# Supplementary material for: Direct arylation of alkyl fluorides using in situ mechanochemically generated calcium-based heavy Grignard reagents
Source: Royal Society of Chemistry journal article supplement (doi:10.1039/d4mr00067f), 2024-01-01

## Direct arylation of alkyl fluorides using *in situ* mechanochemically generated calcium-based heavy Grignard reagents

Pan Gao,<sup>a</sup> Julong Jiang,<sup>b</sup> Yamato Fukuzawa,<sup>a</sup> Satoshi Maeda,<sup>b,c</sup> Koji Kubota,<sup>\*a,c</sup> and Hajime Ito<sup>\*a,c</sup>

<sup>a</sup>Division of Applied Chemistry, Faculty of Engineering, Hokkaido University, Sapporo, Hokkaido, Japan.

<sup>b</sup>Department of Chemistry, Faculty of Science, Hokkaido University, Sapporo, Hokkaido, Japan.

<sup>c</sup>Institute for Chemical Reaction Design and Discovery (WPI-ICReDD), Hokkaido University, Sapporo, Hokkaido, Japan.

### Table of Contents

1. Chemicals and Instrumentation
2. List of Substrates
3. General Procedure for Direct Arylation of Alkyl Fluorides
4. Details of Mechanism Investigations
5. Characterization of Defluoroarylation Products
6. Computational Details
7. References

## 1. Chemicals and Instrumentation.

Liquid additives and solvents were purchased from commercial suppliers and further dried over molecular sieve (MS 4Å). Calcium granular (99%) was purchased from Aldrich (215147-100G). All mechanochemical reactions were carried out using grinding vessels in a Retsch MM 400 (Figure S1). The milling jar (1.5 mL) and two balls (7-mm-diameter), which are made of stainless steel (SUC400B and SUS420J2, respectively), are used for standard ball milling reactions (Figure S2a). Other types of milling jars were also investigated under standard conditions (Figure S2b and S2c). The heat gun Takagi HG-1450B with a temperature control function was used for high-temperature ball-milling reactions (Figure S3). NMR spectra were recorded on JEOL JNM-EC X400P and JNM-ECS400 spectrometers ( $^1\text{H}$ : 396 MHz,  $^{13}\text{C}$ : 100 MHz). Tetramethylsilane ( $^1\text{H}$ ),  $\text{CDCl}_3$  ( $^{13}\text{C}$ ), and fluorobenzene ( $^{19}\text{F}$ ) were employed as external standards, respectively. Multiplicity was recorded as follows: s = singlet, brs = broad singlet, d = doublet, t = triplet, q = quartet, quint = quintet, sext = sextet, hept = heptet and m = multiplet. Dibromomethane was used as an internal standard to determine NMR yields. Thermography was recorded with an NEC Avio Thermo GEAR G120. Recycle preparative gel permeation chromatography (GPC) was conducted with a JAI LaboACE LC-5060 using  $\text{CHCl}_3$  as eluent with JAIGEL-1HR and JAIGEL-2HR. High-resolution mass spectra were recorded at the Global Facility Center, Hokkaido University.

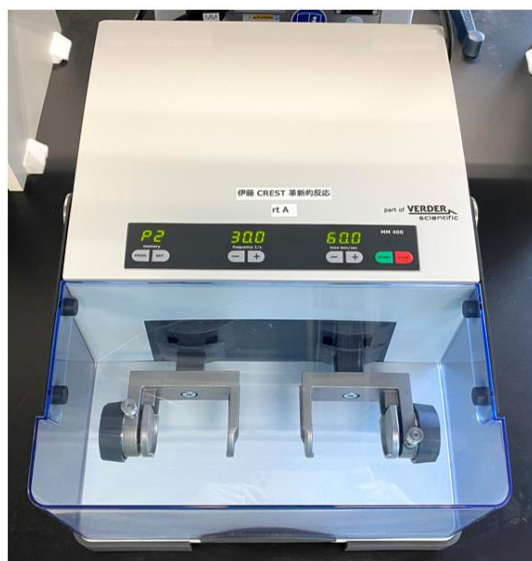

**Figure S1.** Retsch MM400 used in this study.

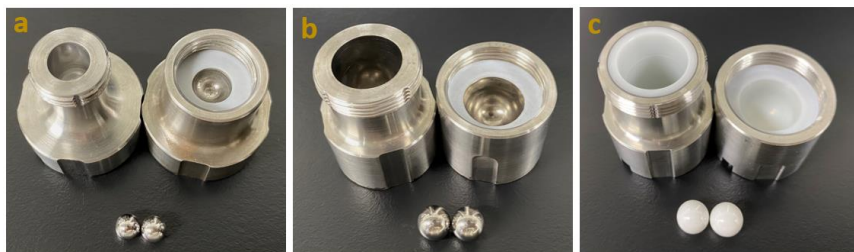

**Figure S2.** (a) 1.5 mL stainless-steel milling jar with two stainless-steel balls (7 mm); (b) 10 mL stainless-steel milling jar with two stainless-steel balls (10 mm); (c) 10 mL zirconium oxide milling jar with two zirconium oxide balls (10 mm).

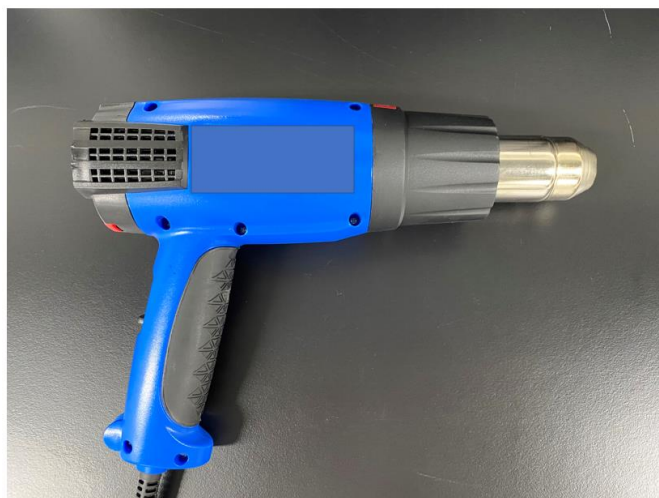

**Figure S3.** The temperature-controllable heat gun Takagi HG-1450B used in this study.

## 2. List of Substrates.

### Aryl iodides

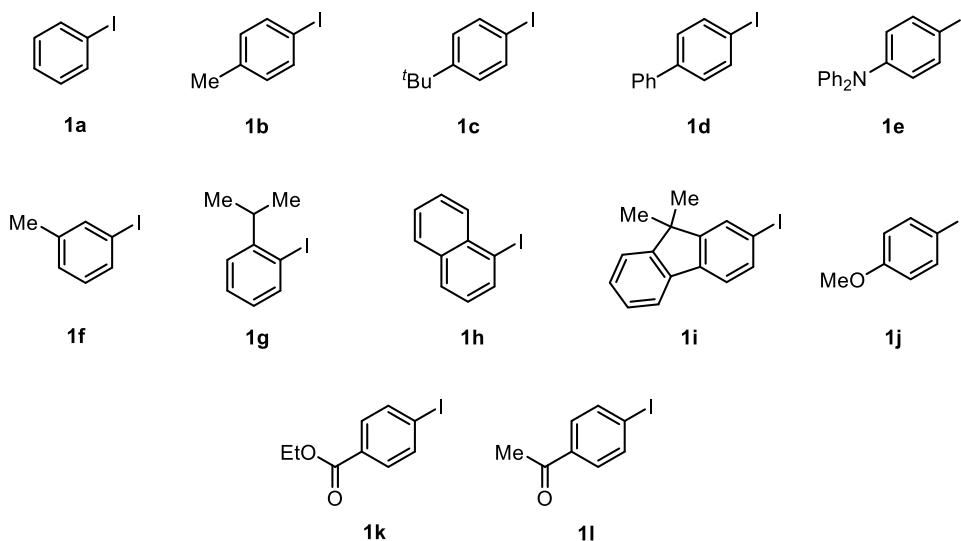

### Alkyl fluorides

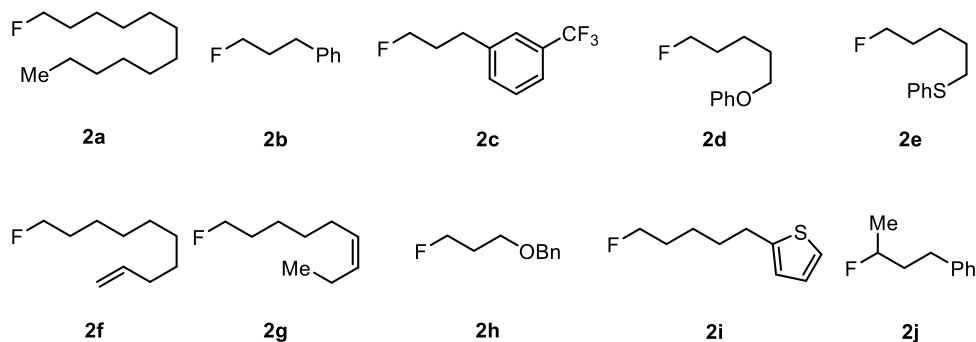

**Figure S4.** List of substrates.

**1a–1l** were purchased from commercial suppliers (Tokyo Chemical Industry Co.) (Figure S4). **2a–2c** and **2f–2h** were prepared from the corresponding alcohols via deoxyfluorination with Ishikawa's reagent.<sup>1</sup> **2d** and **2e** were prepared from 1-bromo-5-fluoropentane via nucleophilic substitution with phenol and thiophenol, respectively. **2i** was prepared from 1-bromo-5-fluoropentane via nucleophilic substitution with 2-lithiothiophene. **2j** was prepared from the corresponding alcohol via deoxyfluorination with PyFluor.<sup>2</sup>



### 3. General Procedure for Direct Arylation of Alkyl Fluorides.

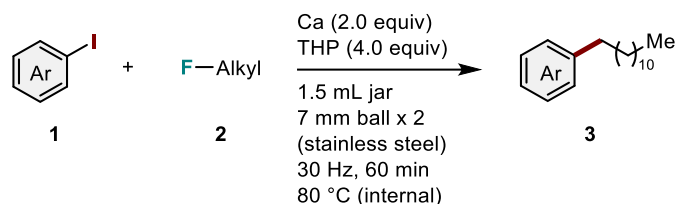

**General procedure:** Commercially available Ca metal granular (1.0 mmol, 2.0 equiv) was placed in a stainless milling jar (1.5 mL) with two stainless balls (7 mm, diameter) in air. An aryl halide (1.5 mmol, 3.0 equiv), an alkyl fluoride (0.5 mmol, 1.0 equiv), and THP (2.0 mmol, 4.0 equiv) were added to the jar. After the jar was closed without purging with inert gas, the jar was placed in the ball mill (Retsch MM 400, 60 min, 30 Hz). A heat gun was set in a downward direction approximately 1 cm above the jar and was turned on (preset temperature: 150 °C, internal temperature in the jar: ca. 80 °C). After grinding for 60 min, the jar was cooled to room temperature, opened in air, and quenched with 1.0 M aq. HCl and then extracted with CH<sub>2</sub>Cl<sub>2</sub> three times. The resultant solution was dried over MgSO<sub>4</sub>, filtrated, and evaporated under a vacuum, after removal of the solvents under reduced pressure. NMR yields of the corresponding products were determined by <sup>1</sup>H NMR analysis with dibromomethane as the internal standard. The crude mixtures were purified by recycling gel permeation chromatography (GPC) using CHCl<sub>3</sub> as the eluent to obtain the desired products with isolated yield.

#### Set-up procedure for high-temperature ball milling

The heat gun was fixed with clamps and placed directly above the ball milling jar (distance between the heat gun and ball milling jar: ca. 1 cm). The set-up procedure for high-temperature ball-milling reactions is shown in Figure S5. After the ball milling jar was closed, the jar was placed in the ball mill (Retsch MM400), and a heat gun was placed directly above the ball milling jar. The mechanochemical generation of organocalcium halide was conducted while applying heated air to the outside of the milling jar (the preset temperature at 120 °C or 80 °C). The temperature inside the milling jar of the mechanochemical reaction was confirmed by thermography immediately after opening the jar.

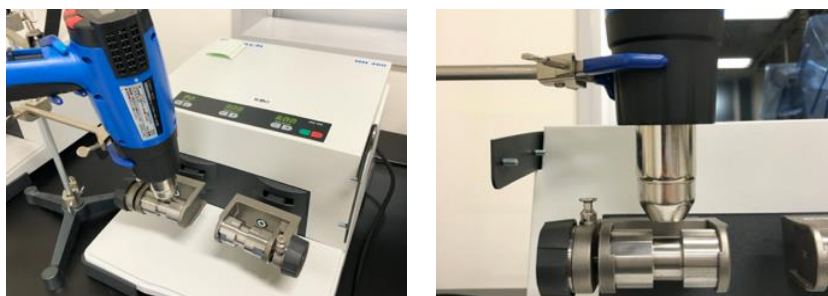

**Figure S5.** The set-up procedure for a heat gun on MM400.

#### Thermography measurements for reaction temperature inside ball milling jars

The temperature inside the milling jar of the mechanochemical reaction was confirmed by thermography immediately after opening the jar. The crude mixtures were prepared under the following conditions: 1.5 mmol of iodobenzene (**1a**); 0.5 mmol of 1-fluorododecane (**2a**); 1.0 mmol of Ca; 2.0 mmol of THP in a stainless-steel ball milling jar (1.5 mL) with two stainless-steel balls (5 mm); the preset temperature of the heat gun: 150 °C; 30 Hz; 1 h. The obtained images revealed that the internal temperature of the ball milling jar was around 80 °C.

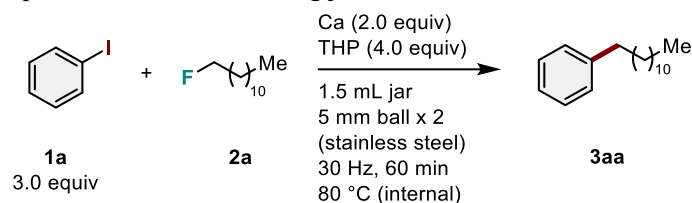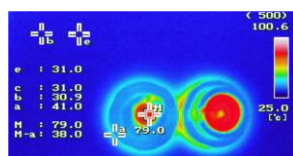

preset Temp.: 150 °C

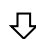

internal Temp.: 80 °C

### Procedure for direct arylation of alkyl fluoride in solution

Commercially available Ca metal granular (1.0 mmol, 2.0 equiv) was placed in an oven-dried reaction vial. After being sealed with a screw cap containing a Teflon<sup>TM</sup>-coated rubber septum, the vial was connected to a nitrogen line through a needle. Iodobenzene (**1a**, 1.5 mmol, 3.0 equiv), 1-fluorododecane (**2a**, 0.5 mmol, 1.0 equiv) and THP (0.25 mL) were added to the vial under a nitrogen atmosphere, and then the reaction mixture was stirred at 80 °C for 60 min. After being cooled to room temperature, the reaction mixture was quenched with 1.0 M aq. HCl and extracted with CH<sub>2</sub>Cl<sub>2</sub> (15 mL×3). The organic layer was separated and dried over MgSO<sub>4</sub>. The desired product of **3aa** was not detected in <sup>1</sup>H NMR analysis, and a significant quantity of calcium metal remained in the reaction vial.

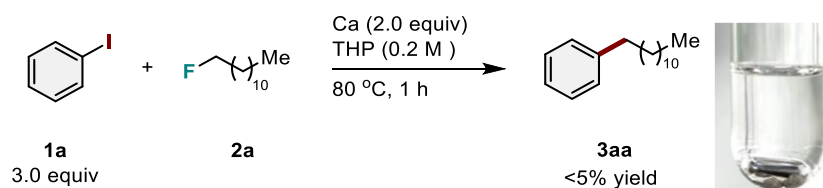

#### 4. Details of Mechanism Investigations.

##### Protonation study of **1h**

Ca metal (1.0 mmol, 2.0 equiv) was placed in a stainless milling jar (1.5 mL) with two stainless balls (5 mm, diameter) in air. 1-Iodonaphthalene (**1h**; 0.5 mmol, 1.0 equiv) and tetrahydropyran (THP) (196  $\mu$ L, 2.0 mmol, 4.0 equiv) were added to the jar. After the jar was closed without purging with inert gas, the jar was placed in the ball mill (Retsch MM 400, 60 min, 30 Hz). A heat gun was set in a downward direction approximately 1 cm above the jar and was turned on (preset temperature: 150  $^{\circ}$ C, internal temperature: ca. 80  $^{\circ}$ C). After grinding for 60 min, the jar was cooled to room temperature, opened in air, and quenched with 1.0 M aq. HCl and extracted with  $\text{CH}_2\text{Cl}_2$  three times. The resultant solution was dried over  $\text{MgSO}_4$  and filtrated. Biphenyl (0.5 mmol) was added to the solution as the internal standard, followed by GC analysis. The conversion of **1h** was >99%, despite low yield of **4** (50%), indicating inconsistent mass balance and the presence of oligomeric side products that cannot be detected by GC.

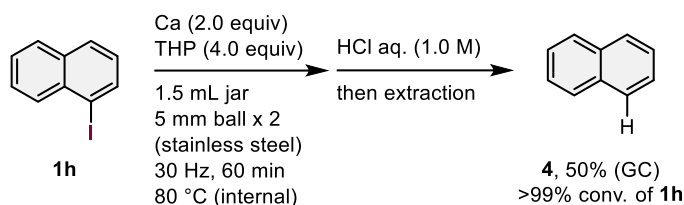

##### Protonation study of **2a**

Ca metal (1.0 mmol, 2.0 equiv) was placed in a stainless milling jar (1.5 mL) with two stainless balls (5 mm, diameter) in air. 1-Fluorododecane (**2a**; 0.5 mmol, 1.0 equiv) and THP (196  $\mu$ L, 2.0 mmol, 4.0 equiv) were added to the jar. After the jar was closed without purging with inert gas, the jar was placed in the ball mill (Retsch MM 400, 60 min, 30 Hz). A heat gun was set in a downward direction approximately 1 cm above the jar and was turned on (preset temperature: 150  $^{\circ}$ C, internal temperature: ca. 80  $^{\circ}$ C). After grinding for 60 min, the jar was cooled to room temperature, opened in air, and quenched with 1.0 M aq. HCl and extracted with  $\text{CH}_2\text{Cl}_2$  three times. The resultant solution was dried over  $\text{MgSO}_4$  and filtrated. Biphenyl (0.5 mmol) was added to the solution as the internal standard, followed by GC analysis. The conversion of **2a** was only 5%, and no protonation product **5** could be detected.

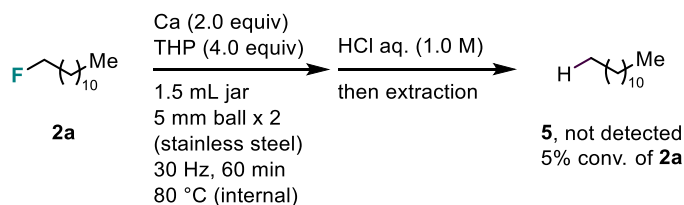

### Reaction using Rieke calcium in solution

Lithium (2.0 mmol, 14.0 mg) and biphenyl (2.2 mmol, 339.2 mg) in dry tetrahydrofuran (THF) (3.0 mL) were stirred under N<sub>2</sub> for 3 h. To a well-suspended solution of CaI<sub>2</sub> (1.6 mmol, 470.2 mg) in dry THF (3.0 mL), the preformed lithium biphenylide was transferred via a disposable syringe at room temperature. The reaction mixture was stirred for 1 h at room temperature. Theoretically, 1.0 mmol Rieke calcium should be generated in situ. This suspension was cooled to -78 °C. Then, 1-iodonaphthalene (**1h**, 1.5 mmol, 381.7 mg) was added via syringe at -78 °C under N<sub>2</sub>, and the mixture was allowed to warm to -10 °C and stirred for 1 hour. Then, iodoethane (**2a**, 0.5 mmol, 94.4 mg) was added at -10 °C. The resulting mixture was gradually warmed to 75 °C and stirred for 12 hours. Finally, the mixture was quenched with water and extracted with CH<sub>2</sub>Cl<sub>2</sub>. The organic solvent was removed under reduced pressure. The crude mixture was analyzed by <sup>1</sup>H NMR with CH<sub>2</sub>Br<sub>2</sub> as an internal standard (21% NMR yield).

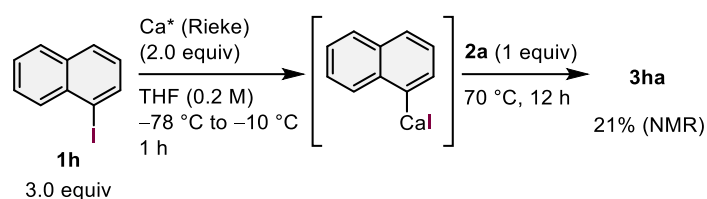

## 5. Characterization of Defluoroarylation Products.

### Dodecylbenzene (3aa).

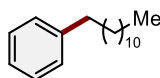

**3aa**

The reaction was conducted according to the general procedure using iodobenzene (**1a**, 306.1 mg, 1.5 mmol) and 1-fluorododecane (**2a**, 94.2 mg, 0.5 mmol). The resulting crude mixture was analyzed by <sup>1</sup>H NMR with dibromomethane as an internal standard to determine the NMR yield of **3aa** (86%). The product **3aa** was isolated as a colorless liquid with a yield of 74% (91.2 mg, 0.37 mmol) through GPC separation. The <sup>1</sup>H and <sup>13</sup>C NMR spectra of product **3aa** were in agreement with the literature.<sup>3</sup> <sup>1</sup>H NMR (399 MHz, CDCl<sub>3</sub>) δ 0.88 (t, *J* = 6.9 Hz, 3H), 1.19–1.38 (m, 18H), 1.61 (quint, *J* = 7.5 Hz, 2H), 2.59 (t, *J* = 7.8 Hz, 2H), 7.13–7.20 (m, 3H), 7.24–7.30 (m, 2H); <sup>13</sup>C NMR (100 MHz, CDCl<sub>3</sub>) 14.1 (CH<sub>3</sub>), 22.7 (CH<sub>2</sub>), 29.4 (CH<sub>2</sub>), 29.5 (CH<sub>2</sub>), 29.60 (CH<sub>2</sub>), 29.65 (CH<sub>2</sub>), 29.68 (CH<sub>2</sub>), 31.5 (CH<sub>2</sub>), 31.9 (CH<sub>2</sub>), 36.0 (CH<sub>2</sub>), 125.5 (CH), 128.2 (CH), 128.4 (CH), 143.0 (C); HRMS-EI (*m/z*): [*M*]<sup>+</sup> calcd for C<sub>18</sub>H<sub>30</sub>, 246.2342; found, 246.2345.

### 1-Dodecyl-4-methylbenzene (3ba).

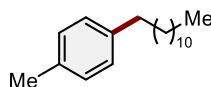

**3ba**

The reaction was conducted according to the general procedure using 4-iodotoluene (**1b**, 327.2 mg, 1.5 mmol) and 1-fluorododecane (**2a**, 94.2 mg, 0.5 mmol). The resulting crude mixture was analyzed by <sup>1</sup>H NMR with dibromomethane as an internal standard to determine the NMR yield of **3ba** (62%). The product **3ba** was isolated as a colorless liquid with a yield of 43% (55.5 mg, 0.21 mmol) through GPC separation. The <sup>1</sup>H and <sup>13</sup>C NMR spectra of product **3ba** were in agreement with the literature.<sup>4</sup> <sup>1</sup>H NMR (399 MHz, CDCl<sub>3</sub>) δ 0.89 (t, *J* = 6.9 Hz, 3H), 1.21–1.38 (m, 18H), 1.60 (quint, *J* = 7.5 Hz, 2H), 2.33 (s, 3H), 2.57 (t, *J* = 7.8 Hz, 2H), 7.04–7.13 (m, 4H); <sup>13</sup>C NMR (100 MHz, CDCl<sub>3</sub>) 14.1 (CH<sub>3</sub>), 21.0 (CH<sub>3</sub>), 22.7 (CH<sub>2</sub>), 29.4 (CH<sub>2</sub>), 29.5 (CH<sub>2</sub>), 29.60 (CH<sub>2</sub>), 29.64 (CH<sub>2</sub>), 29.7 (CH<sub>2</sub>), 31.7 (CH<sub>2</sub>), 31.9 (CH<sub>2</sub>), 35.5 (CH<sub>2</sub>), 128.2 (CH), 128.9 (CH), 134.9 (C), 139.9 (C); HRMS-EI (*m/z*): [*M*]<sup>+</sup> calcd for C<sub>19</sub>H<sub>32</sub>, 260.2499; found, 260.2499.

### 1-(*tert*-Butyl)-4-dodecylbenzene (3ca).

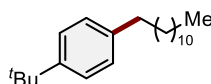

**3ca**

The reaction was conducted according to the general procedure using 1-(*tert*-butyl)-4-iodobenzene (**1c**, 389.8 mg, 1.5 mmol) and 1-fluorododecane (**2a**, 94.1 mg, 0.5 mmol). The resulting crude mixture was analyzed by <sup>1</sup>H NMR with dibromomethane as an internal standard to determine the NMR yield of **3ca** (83%). The product **3ca** was isolated as a colorless liquid with a yield of 62% (93.5 mg, 0.31 mmol) through GPC separation. The <sup>1</sup>H and <sup>13</sup>C NMR spectra of the product **3ca**

were consistent with the literature.<sup>5</sup>

<sup>1</sup>H NMR (399 MHz, CDCl<sub>3</sub>) δ 0.91 (t, *J* = 6.9 Hz, 3H), 1.20–1.42 (m, 27H), 1.63 (quint, *J* = 7.5 Hz, 2H), 2.60 (t, *J* = 8.0 Hz, 2H), 7.14 (d, *J* = 8.2 Hz, 2H), 7.30–7.35 (m, 2H); <sup>13</sup>C NMR (100 MHz, CDCl<sub>3</sub>) 14.1 (CH<sub>3</sub>), 22.7 (CH<sub>3</sub>), 29.4 (CH<sub>2</sub>), 29.50 (CH<sub>2</sub>), 29.55 (CH<sub>2</sub>), 29.62 (CH<sub>2</sub>), 29.66 (CH<sub>2</sub>), 29.70 (CH<sub>2</sub>), 31.4 (CH<sub>2</sub>), 31.5 (CH<sub>2</sub>), 31.9 (CH<sub>2</sub>), 34.3 (C), 35.4 (CH<sub>2</sub>), 125.1 (CH), 128.0 (CH), 139.9 (C), 148.2 (C); HRMS-EI (*m/z*): [M]<sup>+</sup> calcd for C<sub>22</sub>H<sub>38</sub>, 302.2968; found, 302.2966.

#### 4-Dodecyl-1,1'-biphenyl (3da).

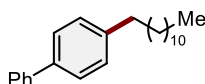

**3da**

The reaction was conducted according to the general procedure, using 4-iodo-1,1'-biphenyl (**1d**, 420.4 mg, 1.5 mmol) and 1-fluorododecane (**2a**, 94.9 mg, 0.5 mmol). The resulting crude mixture was analyzed by <sup>1</sup>H NMR with dibromomethane as an internal standard to determine the NMR yield of **3ca** (74%). The product **3da** was isolated as a colorless liquid with a yield of 65% (106.1 mg, 0.33 mmol) through GPC separation. The <sup>1</sup>H and <sup>13</sup>C NMR spectra of the product **3da** were consistent with the literature.<sup>6</sup>

<sup>1</sup>H NMR (399 MHz, CDCl<sub>3</sub>) δ 0.88 (t, *J* = 6.9 Hz, 3H), 1.19–1.41 (m, 18H), 1.64 (quint, *J* = 7.5 Hz, 2H), 2.64 (t, *J* = 7.8 Hz, 2H), 7.25 (t, *J* = 4.1 Hz, 2H), 7.32 (tt, *J* = 7.3, 1.5 Hz, 1H), 7.39–7.45 (m, 2H), 7.49–7.53 (m, 2H), 7.56–7.61 (m, 2H); <sup>13</sup>C NMR (100 MHz, CDCl<sub>3</sub>) 14.1 (CH<sub>3</sub>), 22.7 (CH<sub>2</sub>), 29.36 (CH<sub>2</sub>), 29.38 (CH<sub>2</sub>), 29.5 (CH<sub>2</sub>), 29.60 (CH<sub>2</sub>), 29.64 (CH<sub>2</sub>), 29.7 (CH<sub>2</sub>), 31.5 (CH<sub>2</sub>), 31.9 (CH<sub>2</sub>), 35.6 (CH<sub>2</sub>), 126.9 (CH), 127.0 (CH), 128.7 (CH), 128.8 (CH), 138.5 (C), 141.2 (C), 142.1 (C); HRMS-EI (*m/z*): [M]<sup>+</sup> calcd for C<sub>24</sub>H<sub>34</sub>, 322.2655; found, 322.2659.

#### 4-Dodecyl-*N,N*-diphenylaniline (3ea).

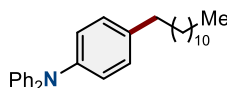

**3ea**

The reaction was conducted according to the general procedure, using 4-iodo-*N,N*-diphenylaniline (**1e**, 557.2 mg, 1.5 mmol), and 1-fluorododecane (**2a**, 94.3 mg, 0.5 mmol). The resulting crude mixture was analyzed by <sup>1</sup>H NMR with dibromomethane as an internal standard to determine the NMR yield of **3ea** (63%). The product **3ea** was isolated as a colorless liquid with a yield of 55% (113.3 mg, 0.27 mmol) through GPC separation.

<sup>1</sup>H NMR (399 MHz, CDCl<sub>3</sub>) δ 0.88 (t, *J* = 6.9 Hz, 3H), 1.20–1.39 (m, 18H), 1.60 (quint, *J* = 7.5 Hz, 2H), 2.55 (t, *J* = 7.8 Hz, 2H), 6.92–7.10 (m, 10H), 7.17–7.26 (m, 4H); <sup>13</sup>C NMR (100 MHz, CDCl<sub>3</sub>) 14.1 (CH<sub>3</sub>), 22.7 (CH<sub>2</sub>), 29.36 (CH<sub>2</sub>), 29.4 (CH<sub>2</sub>), 29.5 (CH<sub>2</sub>), 29.61 (CH<sub>2</sub>), 29.65 (CH<sub>2</sub>), 29.7 (CH<sub>2</sub>), 31.5 (CH<sub>2</sub>), 31.9 (CH<sub>2</sub>), 35.4 (CH<sub>2</sub>), 122.2 (CH), 123.7 (CH), 124.7 (CH), 129.08 (CH), 129.15 (CH), 137.8 (C), 145.3 (C), 148.0 (C); HRMS-EI (*m/z*): [M]<sup>+</sup> calcd for C<sub>30</sub>H<sub>39</sub>N, 413.3077; found, 413.3080.

### 1-Dodecyl-3-methylbenzene (3fa).

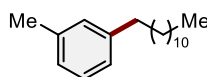

3fa

The reaction was conducted according to the general procedure using 1-iodo-3-methylbenzene (**1f**, 326.7 mg, 1.5 mmol) and 1-fluorododecane (**2a**, 94.6 mg, 0.5 mmol). The resulting crude mixture was analyzed by  $^1\text{H}$  NMR with dibromomethane as an internal standard to determine the NMR yield of **3fa** (88%). The product **3fa** was isolated as a colorless liquid with a yield of 73% (95.9 mg, 0.37 mmol) through GPC separation. The  $^1\text{H}$  and  $^{13}\text{C}$  NMR spectra of product **3fa** were consistent with the literature.<sup>7</sup>

$^1\text{H}$  NMR (399 MHz,  $\text{CDCl}_3$ )  $\delta$  0.92 (t,  $J = 6.9$  Hz, 3H), 1.24–1.41 (m, 18H), 1.63 (quint,  $J = 7.4$  Hz, 2H), 2.36 (s, 3H), 2.60 (t,  $J = 7.8$  Hz, 2H), 6.99–7.06 (m, 3H), 7.20 (t,  $J = 7.5$  Hz, 1H);  $^{13}\text{C}$  NMR (100 MHz,  $\text{CDCl}_3$ ) 14.1 ( $\text{CH}_3$ ), 21.4 ( $\text{CH}_3$ ), 22.7 ( $\text{CH}_2$ ), 29.38 ( $\text{CH}_2$ ), 29.43 ( $\text{CH}_2$ ), 29.55 ( $\text{CH}_2$ ), 29.62 ( $\text{CH}_2$ ), 29.67 ( $\text{CH}_2$ ), 29.70 ( $\text{CH}_2$ ), 31.6 ( $\text{CH}_2$ ), 31.9 ( $\text{CH}_2$ ), 35.9 ( $\text{CH}_2$ ), 125.4 (CH), 126.3 (CH), 128.1 (CH), 129.2 (CH), 137.7 (C), 142.9 (C); HRMS-EI ( $m/z$ ):  $[\text{M}]^+$  calcd for  $\text{C}_{19}\text{H}_{32}$ , 260.2499; found, 260.2499.

### 1-Dodecyl-2-isopropylbenzene (3ga).

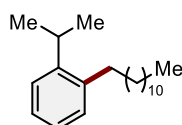

3ga

The reaction was conducted according to the general procedure using 1-iodo-2-isopropylbenzene (**1g**, 369.5 mg, 1.5 mmol) and 1-fluorododecane (**2a**, 94.3 mg, 0.5 mmol). The resulting crude mixture was analyzed by  $^1\text{H}$  NMR with dibromomethane as an internal standard to determine the NMR yield of **3ga** (80%). Product **3ga** was isolated as a colorless liquid with a yield of 67% (97.5 mg, 0.34 mmol) through GPC separation.

$^1\text{H}$  NMR (399 MHz,  $\text{CDCl}_3$ )  $\delta$  0.88 (t,  $J = 6.9$  Hz, 3H), 1.18–1.44 (m, 24H), 1.50–1.61 (m, 2H), 2.62 (t,  $J = 8.0$  Hz, 2H), 3.17 (sept,  $J = 6.8$  Hz, 1H), 7.06–7.20 (m, 3H), 7.23–7.28 (m, 1H);  $^{13}\text{C}$  NMR (100 MHz,  $\text{CDCl}_3$ ) 14.1 ( $\text{CH}_3$ ), 22.7 ( $\text{CH}_2$ ), 24.1 ( $\text{CH}_3$ ), 28.5 (CH), 29.4 ( $\text{CH}_2$ ), 29.56 ( $\text{CH}_2$ ), 29.63 ( $\text{CH}_2$ ), 29.65 ( $\text{CH}_2$ ), 29.67 ( $\text{CH}_2$ ), 29.8 ( $\text{CH}_2$ ), 31.86 ( $\text{CH}_2$ ), 31.93 ( $\text{CH}_2$ ), 33.0 ( $\text{CH}_2$ ), 125.2 (CH), 125.4 (CH), 126.1 (CH), 129.3 (CH), 139.6 (C), 146.4 (C); HRMS-EI ( $m/z$ ):  $[\text{M}]^+$  calcd for  $\text{C}_{21}\text{H}_{36}$ , 288.2812; found, 288.2815.

### 1-Dodecyl-naphthalene (3ha).

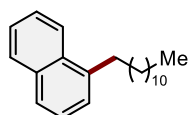

3ha

The reaction was conducted according to the general procedure using 1-iodonaphthalene (**1h**, 381.5 mg, 1.5 mmol) and 1-fluorododecane (**2a**, 94.4 mg, 0.5 mmol). The resulting crude mixture was

analyzed by  $^1\text{H}$  NMR with dibromomethane as an internal standard to determine the NMR yield of **3ha** (69%). The product **3ha** was isolated as a colorless liquid with a yield of 56% (82.9 mg, 0.36 mmol) through GPC separation. The  $^1\text{H}$  and  $^{13}\text{C}$  NMR spectra of product **3ha** were consistent with the literature.<sup>8</sup>

$^1\text{H}$  NMR (399 MHz,  $\text{CDCl}_3$ )  $\delta$  0.91 (t,  $J = 6.9$  Hz, 3H), 1.22–1.51 (m, 18H), 1.77 (quint,  $J = 7.6$  Hz, 2H), 3.08 (t,  $J = 7.8$  Hz, 2H), 7.34 (d,  $J = 5.9$  Hz, 1H), 7.41 (t,  $J = 7.5$  Hz, 1H), 7.46–7.55 (m, 2H), 7.72 (d,  $J = 8.2$  Hz, 1H), 7.85–7.89 (m, 1H), 8.07 (d,  $J = 8.2$  Hz, 1H);  $^{13}\text{C}$  NMR (100 MHz,  $\text{CDCl}_3$ ) 14.1 ( $\text{CH}_3$ ), 22.7 ( $\text{CH}_2$ ), 29.4 ( $\text{CH}_2$ ), 29.56 ( $\text{CH}_2$ ), 29.65 ( $\text{CH}_2$ ), 29.69 ( $\text{CH}_2$ ), 29.9 ( $\text{CH}_2$ ), 30.9 ( $\text{CH}_2$ ), 31.9 ( $\text{CH}_2$ ), 33.1 ( $\text{CH}_2$ ), 123.9 (CH), 125.3 (CH), 125.5 (CH), 125.6 (CH), 125.8 (CH), 126.3 (CH), 128.7 (CH), 131.9 (C), 133.8 (C), 139.0 (C); HRMS-EI (m/z):  $[\text{M}]^+$  calcd for  $\text{C}_{22}\text{H}_{32}$ , 296.2499; found, 296.2501.

### 2-Dodecyl-9,9-dimethyl-9H-fluorene (**3ia**).

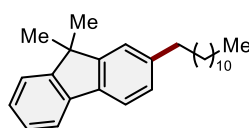

**3ia**

The reaction was conducted according to the general procedure using 2-iodo-9,9-dimethyl-9H-fluorene (**1i**, 480.5 mg, 1.5 mmol) and 1-fluorododecane (**2a**, 94.4 mg, 0.5 mmol). The resulting crude mixture was analyzed by  $^1\text{H}$  NMR with dibromomethane as an internal standard to determine the NMR yield of **3ia** (85%). Product **3ia** was isolated as a colorless liquid with a yield of 72% (130.9 mg, 0.36 mmol) through GPC separation.

$^1\text{H}$  NMR (399 MHz,  $\text{CDCl}_3$ )  $\delta$  0.88 (t,  $J = 6.9$  Hz, 3H), 1.20–1.40 (m, 18H), 1.47 (s, 6H), 1.66 (quint,  $J = 7.6$  Hz, 2H), 2.67 (t,  $J = 8.0$  Hz, 2H), 7.15 (dd,  $J = 7.8, 1.4$  Hz, 1H), 7.21–7.34 (m, 3H), 7.39–7.43 (m, 1H), 7.62 (d,  $J = 7.8$  Hz, 1H), 7.66–7.70 (m, 1H);  $^{13}\text{C}$  NMR (100 MHz,  $\text{CDCl}_3$ ) 14.1 ( $\text{CH}_3$ ), 22.7 ( $\text{CH}_2$ ), 27.2 ( $\text{CH}_3$ ), 29.36 ( $\text{CH}_3$ ), 29.45 ( $\text{CH}_2$ ), 29.53 ( $\text{CH}_2$ ), 29.62 ( $\text{CH}_2$ ), 29.65 ( $\text{CH}_2$ ), 29.67 ( $\text{CH}_2$ ), 31.8 ( $\text{CH}_2$ ), 31.9 ( $\text{CH}_2$ ), 36.3 ( $\text{CH}_2$ ), 46.6 (C), 119.6 (CH), 119.7 (CH), 122.5 (CH), 122.6 (CH), 126.7 (CH), 126.8 (CH), 127.1 (CH), 136.7 (C), 139.3 (C), 142.4 (C), 153.5 (C), 153.7 (C); HRMS-EI (m/z):  $[\text{M}]^+$  calcd for  $\text{C}_{27}\text{H}_{38}$ , 362.2968; found, 362.2974.

### 1,3-Diphenylpropane (**3ab**)

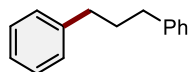

**3ab**

The reaction was conducted according to the general procedure using iodobenzene (**1a**, 306.8 mg, 1.5 mmol) and (3-fluoropropyl)benzene (**2b**, 69.0 mg, 0.5 mmol). The resulting crude mixture was analyzed by  $^1\text{H}$  NMR with dibromomethane as an internal standard to determine the NMR yield of **3ab** (82%). Product **3ab** was isolated as a colorless liquid with a yield of 78% (76.4 mg, 0.39 mmol) through GPC separation. The  $^1\text{H}$  and  $^{13}\text{C}$  NMR spectra of the product **3ab** were consistent with the literature.<sup>9</sup>

$^1\text{H}$  NMR (399 MHz,  $\text{CDCl}_3$ )  $\delta$  1.91–2.01 (m, 2H), 2.65 (t,  $J = 7.8$  Hz, 4H), 7.15–7.22 (m, 6H), 7.24–7.31 (m, 4H);  $^{13}\text{C}$  NMR (100 MHz,  $\text{CDCl}_3$ ) 32.9 ( $\text{CH}_2$ ), 35.4 ( $\text{CH}_2$ ), 125.7 (CH), 128.3 (CH), 128.4



(CH), 142.2 (C); HRMS-EI (m/z):  $[M]^+$  calcd for  $C_{15}H_{16}$ , 196.1247; found, 196.1249.

### 1-(3-Phenylpropyl)-3-(trifluoromethyl)benzene (**3ac**)

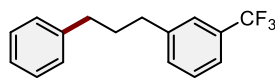

**3ac**

The reaction was conducted according to the general procedure, using iodobenzene (**1a**, 360.8 mg, 1.8 mmol) and 1-(3-fluoropropyl)-3-(trifluoromethyl)benzene (**2c**, 103.0 mg, 0.5 mmol). The resulting crude mixture was analyzed by  $^1H$  NMR with dibromomethane as an internal standard to determine the NMR yield of **3ac** (86%). Product **3ac** was isolated as a colorless liquid with a yield of 69% (91.6 mg, 0.35 mmol) through GPC separation.

$^1H$  NMR (399 MHz,  $CDCl_3$ )  $\delta$  1.92–2.02 (m, 2H), 2.62–2.73 (m, 4H), 7.15–7.23 (m, 3H), 7.25–7.46 (m, 6H);  $^{13}C$  NMR (100 MHz,  $CDCl_3$ ) 32.7 ( $CH_2$ ), 35.2 ( $CH_2$ ), 35.3 ( $CH_2$ ), 122.6 (q,  $J = 3.5$  Hz, CH), 124.3 (q,  $J = 264.0$  Hz, C), 125.1 (q,  $J = 3.5$  Hz, CH), 125.9 (CH), 128.37 (CH), 128.41 (CH), 128.7 (CH), 130.6 (q,  $J = 130.6$  Hz, C), 131.8 (CH), 141.8 (C), 143.1 (C); HRMS-EI (m/z):  $[M]^+$  calcd for  $C_{16}H_{15}F_3$ , 264.1120; found, 264.1126.

### (5-Phenoxypropyl)benzene (**3ad**)

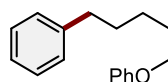

**3ad**

The reaction was conducted according to the general procedure, using iodobenzene (**1a**, 306.8 mg, 1.5 mmol) and [(5-fluoropentyl)oxy]benzene (**2d**, 91.5 mg, 0.5 mmol). The resulting crude mixture was analyzed by  $^1H$  NMR with dibromomethane as an internal standard to determine the NMR yield of **3ad** (78%). Product **3ad** was isolated as a colorless liquid with a yield of 66% (79.5 mg, 0.33 mmol) through GPC separation. The  $^1H$  and  $^{13}C$  NMR spectra of the product **3ad** were consistent with the literature.<sup>10</sup>

$^1H$  NMR (401 MHz,  $CDCl_3$ )  $\delta$  1.49–1.59 (m, 2H), 1.72 (quint,  $J = 7.6$  Hz, 2H), 1.84 (quint,  $J = 7.1$  Hz, 2H), 2.67 (t,  $J = 7.8$  Hz, 2H), 3.97 (t,  $J = 6.4$  Hz, 2H), 6.88–6.99 (m, 3H), 7.18–7.24 (m, 3H), 7.27–7.34 (m, 4H);  $^{13}C$  NMR (100 MHz,  $CDCl_3$ ) 25.7 ( $CH_2$ ), 29.1 ( $CH_2$ ), 31.3 ( $CH_2$ ), 35.8 ( $CH_2$ ), 67.7 ( $CH_2$ ), 114.4 (CH), 120.5 (CH), 125.7 (CH), 128.3 (CH), 128.4 (CH), 129.4 (CH), 142.5 (C), 159.0 (C); HRMS-EI (m/z):  $[M]^+$  calcd for  $C_{17}H_{20}O$ , 240.1509; found, 240.1510.

### Phenyl(5-phenylpentyl)sulfane (**3ae**)

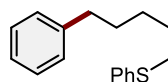

**3ae**

The reaction was conducted according to the general procedure using iodobenzene (**1a**, 359.0 mg, 1.8 mmol) and (5-fluoropentyl)(phenyl)sulfane (**2e**, 99.4 mg, 0.5 mmol). The resulting crude mixture was analyzed by  $^1H$  NMR with dibromomethane as an internal standard to determine the NMR yield of **3ae** (70%). Product **3ae** was isolated as a colorless liquid with a yield of 62% (79.1

mg, 0.31 mmol) through GPC separation. The  $^1\text{H}$  and  $^{13}\text{C}$  NMR spectra of product **3ae** were consistent with the literature.<sup>11</sup>

$^1\text{H}$  NMR (401 MHz,  $\text{CDCl}_3$ )  $\delta$  1.42–1.52 (m, 2H), 1.58–1.73 (m, 4H), 2.60 (t,  $J = 7.8$  Hz, 2H), 2.91 (t,  $J = 7.6$  Hz, 2H), 7.12–7.21 (m, 4H), 7.24–7.34 (m, 6H);  $^{13}\text{C}$  NMR (100 MHz,  $\text{CDCl}_3$ ) 28.4 ( $\text{CH}_2$ ), 29.0 ( $\text{CH}_2$ ), 31.0 ( $\text{CH}_2$ ), 33.4 ( $\text{CH}_2$ ), 35.7 ( $\text{CH}_2$ ), 125.7 (CH), 128.2 (CH), 128.4 (CH), 128.8 (CH), 128.9 (CH), 136.8 (C), 142.4 (C); HRMS-EI (m/z):  $[\text{M}]^+$  calcd for  $\text{C}_{17}\text{H}_{20}\text{S}$ , 256.1280; found, 256.1284.

### Dec-9-en-1-ylbenzene (**3af**)

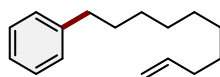

**3af**

The reaction was conducted according to the general procedure, using iodobenzene (**1a**, 306.6 mg, 1.5 mmol) and 10-fluorodec-1-ene (**2f**, 79.2 mg, 0.5 mmol). The resulting crude mixture was analyzed by  $^1\text{H}$  NMR with dibromomethane as an internal standard to determine the NMR yield of **3af** (83%). The product **3af** was isolated as a colorless liquid with a yield of 72% (77.6 mg, 0.36 mmol) through GPC separation. The  $^1\text{H}$  and  $^{13}\text{C}$  NMR spectra of product **3af** were consistent with the literature.<sup>11</sup>

$^1\text{H}$  NMR (399 MHz,  $\text{CDCl}_3$ )  $\delta$  1.25–1.46 (m, 10H), 1.64 (quint,  $J = 7.6$  Hz, 2H), 2.02–2.11 (m, 2H), 2.62 (t,  $J = 7.8$  Hz, 2H), 4.92–5.07 (m, 2H), 5.78–5.90 (m, 1H), 7.15–7.24 (m, 3H), 7.27–7.34 (m, 2H);  $^{13}\text{C}$  NMR (100 MHz,  $\text{CDCl}_3$ ) 28.9 ( $\text{CH}_2$ ), 29.1 ( $\text{CH}_2$ ), 29.3 ( $\text{CH}_2$ ), 29.41 ( $\text{CH}_2$ ), 29.44 ( $\text{CH}_2$ ), 31.5 ( $\text{CH}_2$ ), 33.8 ( $\text{CH}_2$ ), 36.0 ( $\text{CH}_2$ ), 114.1 ( $\text{CH}_2$ ), 125.5 (CH), 128.2 (CH), 128.4 (CH), 139.2 (CH), 142.9 (C); HRMS-EI (m/z):  $[\text{M}]^+$  calcd for  $\text{C}_{16}\text{H}_{24}$ , 216.1873; found, 216.1876.

### (Z)-Non-6-en-1-ylbenzene (**3ag**)

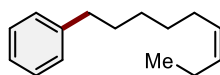

**3ag**

The reaction was conducted according to the general procedure, using iodobenzene (**1a**, 306.2 mg, 1.5 mmol) and (Z)-9-fluoronon-3-ene (**2g**, 72.0 mg, 0.5 mmol). The resulting crude mixture was analyzed by  $^1\text{H}$  NMR with dibromomethane as an internal standard to determine the NMR yield of **3ag** (86%). Product **3ag** was isolated as a colorless liquid with a yield of 73% (73.5 mg, 0.36 mmol) through GPC separation.

$^1\text{H}$  NMR (399 MHz,  $\text{CDCl}_3$ )  $\delta$  0.95 (t,  $J = 7.5$  Hz, 3H), 1.30–1.42 (m, 4H), 1.62 (quint,  $J = 7.6$  Hz, 2H), 1.94–2.10 (m, 4H), 2.60 (t,  $J = 7.8$  Hz, 2H), 5.27–5.43 (m, 2H), 7.14–7.20 (m, 3H), 7.23–7.30 (m, 2H);  $^{13}\text{C}$  NMR (100 MHz,  $\text{CDCl}_3$ ) 14.4 ( $\text{CH}_3$ ), 20.5 ( $\text{CH}_2$ ), 27.0 ( $\text{CH}_2$ ), 29.0 ( $\text{CH}_2$ ), 29.6 ( $\text{CH}_2$ ), 31.4 ( $\text{CH}_2$ ), 36.0 ( $\text{CH}_2$ ), 125.5 (CH), 128.2 (CH), 128.4 (CH), 129.1 (CH), 131.6 (CH), 142.8 (C); HRMS-EI (m/z):  $[\text{M}]^+$  calcd for  $\text{C}_{15}\text{H}_{22}$ , 202.1716; found, 202.1720.

## 6. Computational Details.

The AFIR method<sup>12</sup> was used to suggest the plausible geometry of  $\text{PhCa}(\text{THP})_2$  via a comprehensive and unbiased sampling calculation. The preliminary calculations strongly suggested that either monomeric or dimeric  $\text{PhCa}(\text{THP})_2$  is highly unstable. Therefore, efforts were made to explore the plausible structures of tetrameric  $\text{PhCa}(\text{THP})_2$ . The sampling calculation was conducted using the SC-AFIR method at the semi-empirical GFN1-xTB level of theory<sup>13</sup> as implemented in ORCA 4.0 software package,<sup>14</sup> and a collision energy of  $200 \text{ kJ}\cdot\text{mol}^{-1}$  was applied to the entire molecule for any possible bond rearrangements.<sup>12</sup> The AFIR sampling calculation provided in total 1787 possible isomers and conformers for  $\text{PhCa}(\text{THP})_2$  tetramer, of which the ones having the lowest energies were further optimized at the DFT level of theory with the B3LYP hybrid functional<sup>15</sup> as implemented in Gaussian 16.<sup>16</sup> It is noteworthy that the energy profile shown in this study was generated with the geometries and energies derived from the following DFT calculations. In order to describe the dispersion properly, an explicit dispersion correction term called GD3,<sup>17</sup> was also employed in the DFT calculations. The polarized triple-zeta 6-311G(d,p) basis set<sup>18</sup> was used for C, H, O, and F atoms during both the geometry optimization and the single-point calculation processes. The Stuttgart/Dresden pseudo-potential basis set SDD,<sup>19</sup> as well as a d-polarization function,<sup>20</sup> are used for Ca ( $\zeta = 1.245$ ) and I ( $\zeta = 0.289$ ) atoms. All the minima and transition states were fully optimized without any constraints. Frequency calculations were carried out to characterize all the optimized structures as minima or transition states. Transition states were identified by having one imaginary frequency. An intrinsic reaction coordinate (IRC) calculation<sup>21</sup> was performed for each transition state to ensure that it connected the correct reactants and products. The free energies were computed at 298.15 K and 1 atm. All the geometries shown in this article is visualized by the CYLview software.<sup>22</sup>

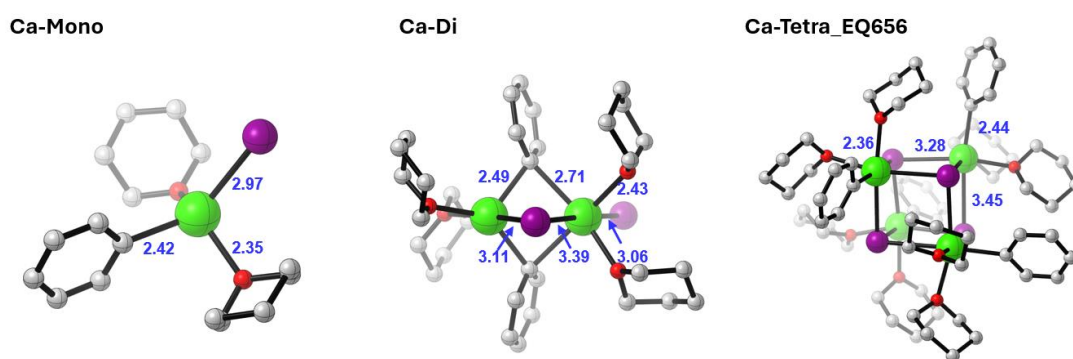

**Figure S6.** Optimized structures of monomeric, dimeric, and tetrameric organocalcium species.

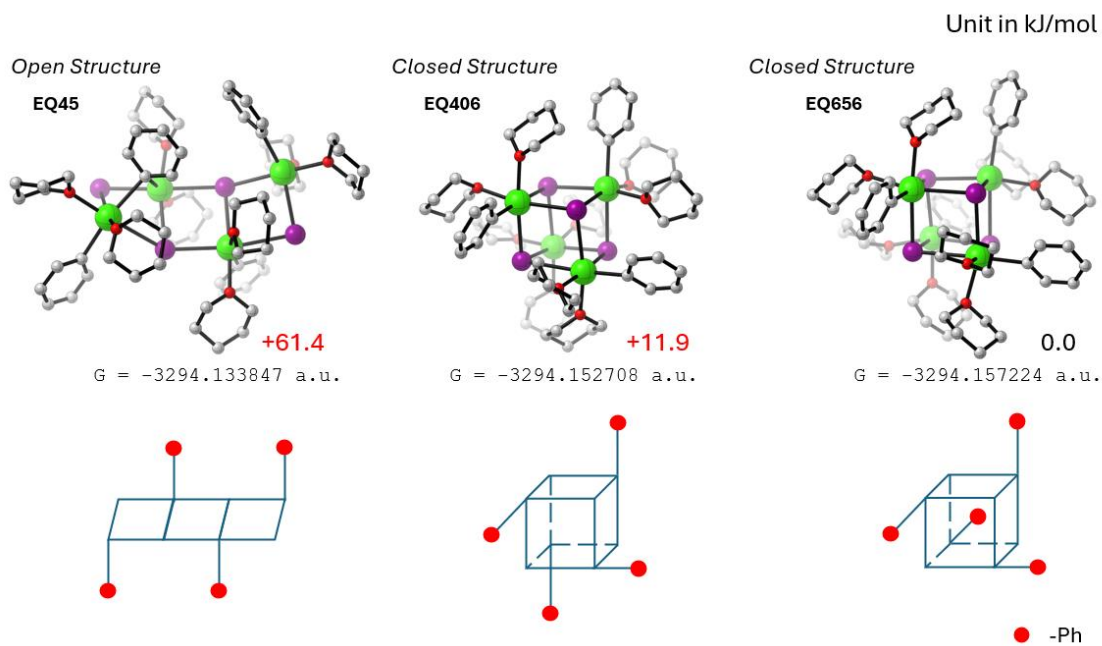

**Figure S7.** Comparison of the stability of tetrameric organocalcium species.

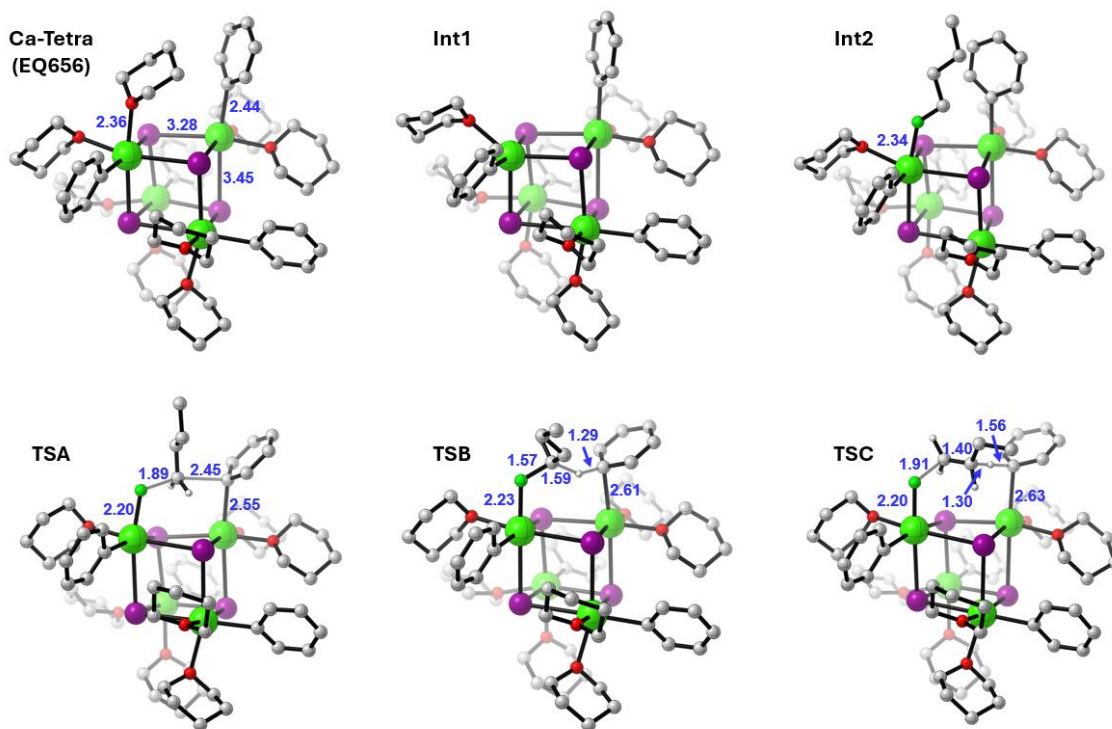

**Figure S8.** Optimized structures of intermediates and transition states along the reaction pathways.

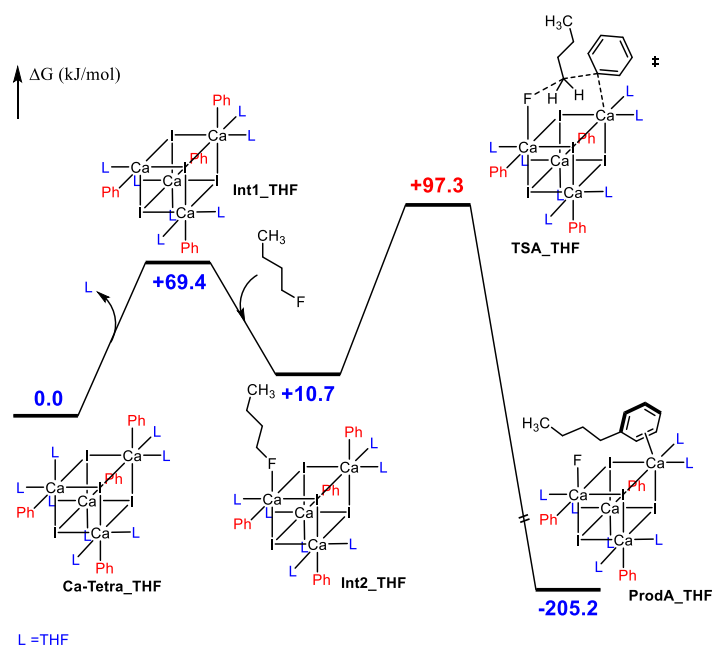

**Figure S9.** Free energy profile of the defluorinated C-C cross-coupling reaction, in which the ligand is tetrahydrofuran (THF).

### Cartesian coordinates of optimized structures

( $E_{el}$ : Electronic Energy;  $G$ : Gibbs Free Energy at 298.15 Kelvin and under 1 atm)

#### Ca-Mono

( $E_{el}$  = -823.837912 a.u.;  $G$  = -823.514358 a.u.)

0 1

|    |                 |                 |                 |
|----|-----------------|-----------------|-----------------|
| Ca | 0.038417000000  | -0.052081000000 | -0.385211000000 |
| I  | 1.066890000000  | -2.491396000000 | 0.954084000000  |
| C  | -0.892282000000 | 2.046554000000  | 0.392005000000  |
| C  | -1.101131000000 | 2.310264000000  | 1.763579000000  |
| C  | -1.302693000000 | 3.084999000000  | -0.473687000000 |
| C  | -1.667652000000 | 3.497124000000  | 2.237082000000  |
| H  | -0.812839000000 | 1.562636000000  | 2.503521000000  |
| C  | -1.871320000000 | 4.280898000000  | -0.027546000000 |
| H  | -1.179672000000 | 2.968384000000  | -1.554049000000 |
| C  | -2.056002000000 | 4.489629000000  | 1.338397000000  |
| H  | -1.806732000000 | 3.650100000000  | 3.303772000000  |
| H  | -2.169659000000 | 5.047236000000  | -0.738002000000 |
| H  | -2.496677000000 | 5.413904000000  | 1.697649000000  |
| C  | 3.196700000000  | -0.049814000000 | -1.456878000000 |
| C  | 2.242833000000  | 2.171272000000  | -1.420752000000 |
| C  | 4.036256000000  | 0.234899000000  | -0.218872000000 |
| H  | 2.874478000000  | -1.091173000000 | -1.488787000000 |
| H  | 3.738434000000  | 0.189625000000  | -2.380358000000 |
| C  | 3.033710000000  | 2.547897000000  | -0.175755000000 |
| H  | 1.268020000000  | 2.657767000000  | -1.435174000000 |
| H  | 2.788219000000  | 2.422816000000  | -2.338935000000 |
| C  | 4.333658000000  | 1.735616000000  | -0.092786000000 |
| H  | 3.484810000000  | -0.123577000000 | 0.656586000000  |
| H  | 4.959766000000  | -0.349149000000 | -0.275321000000 |
| H  | 2.403423000000  | 2.356091000000  | 0.699493000000  |
| H  | 3.236663000000  | 3.622845000000  | -0.194932000000 |
| H  | 4.853911000000  | 1.942438000000  | 0.845797000000  |
| H  | 5.005887000000  | 2.044279000000  | -0.903626000000 |
| O  | 1.976516000000  | 0.741602000000  | -1.440303000000 |
| C  | -3.044149000000 | -0.058400000000 | -1.557632000000 |
| C  | -2.179345000000 | -2.309930000000 | -1.422908000000 |
| C  | -3.903731000000 | -0.254998000000 | -0.316873000000 |
| H  | -2.686273000000 | 0.967886000000  | -1.633328000000 |
| H  | -3.586458000000 | -0.322051000000 | -2.474233000000 |
| C  | -3.005330000000 | -2.608448000000 | -0.178994000000 |
| H  | -1.222704000000 | -2.832764000000 | -1.402061000000 |
| H  | -2.716950000000 | -2.574850000000 | -2.341792000000 |
| C  | -4.267948000000 | -1.735766000000 | -0.138138000000 |

|   |                 |                 |                 |
|---|-----------------|-----------------|-----------------|
| H | -3.340412000000 | 0.112879000000  | 0.547542000000  |
| H | -4.799661000000 | 0.367135000000  | -0.402689000000 |
| H | -2.378572000000 | -2.420846000000 | 0.699383000000  |
| H | -3.258018000000 | -3.672932000000 | -0.167825000000 |
| H | -4.803669000000 | -1.885962000000 | 0.802527000000  |
| H | -4.947989000000 | -2.041750000000 | -0.943477000000 |
| O | -1.855299000000 | -0.893621000000 | -1.490363000000 |

### Ca-Di

( $E_{el}$  = -1647.748994 a.u.;  $G$  = -1647.068063 a.u.)

0 1

|    |                 |                 |                 |
|----|-----------------|-----------------|-----------------|
| Ca | -1.865456000000 | 0.401504000000  | -0.284405000000 |
| I  | -0.668322000000 | -1.748110000000 | -2.186501000000 |
| I  | 3.206963000000  | 1.347666000000  | 1.927030000000  |
| Ca | 1.358387000000  | -0.161213000000 | 0.019095000000  |
| C  | -0.009822000000 | 1.951099000000  | -0.952215000000 |
| C  | 0.517114000000  | 3.086523000000  | -0.292420000000 |
| C  | -0.389395000000 | 2.180424000000  | -2.296009000000 |
| C  | 0.661942000000  | 4.331805000000  | -0.908069000000 |
| H  | 0.861277000000  | 2.993931000000  | 0.733752000000  |
| C  | -0.280840000000 | 3.425421000000  | -2.925721000000 |
| H  | -0.753135000000 | 1.347094000000  | -2.899819000000 |
| C  | 0.250917000000  | 4.508952000000  | -2.229365000000 |
| H  | 1.093302000000  | 5.162632000000  | -0.357344000000 |
| H  | -0.588697000000 | 3.543237000000  | -3.960904000000 |
| H  | 0.352645000000  | 5.475642000000  | -2.711782000000 |
| C  | -0.743657000000 | -0.713632000000 | 1.638553000000  |
| C  | -0.383495000000 | -0.178174000000 | 2.897861000000  |
| C  | -1.511175000000 | -1.900754000000 | 1.701670000000  |
| C  | -0.739615000000 | -0.776456000000 | 4.109646000000  |
| H  | 0.221374000000  | 0.724775000000  | 2.940263000000  |
| C  | -1.896013000000 | -2.506494000000 | 2.901785000000  |
| H  | -1.801560000000 | -2.398164000000 | 0.774449000000  |
| C  | -1.504137000000 | -1.943450000000 | 4.114986000000  |
| H  | -0.417028000000 | -0.335857000000 | 5.048307000000  |
| H  | -2.480167000000 | -3.422520000000 | 2.891117000000  |
| H  | -1.783279000000 | -2.411878000000 | 5.053027000000  |
| C  | 2.130288000000  | -3.551835000000 | -0.218517000000 |
| C  | 2.895591000000  | -2.561902000000 | 1.820058000000  |
| C  | 1.083048000000  | -4.387944000000 | 0.505343000000  |
| H  | 1.789161000000  | -3.274302000000 | -1.214109000000 |
| H  | 3.084520000000  | -4.089634000000 | -0.304405000000 |
| C  | 1.884360000000  | -3.339028000000 | 2.651577000000  |
| H  | 3.114797000000  | -1.582245000000 | 2.242036000000  |

|   |                 |                 |                 |
|---|-----------------|-----------------|-----------------|
| H | 3.838807000000  | -3.114385000000 | 1.713489000000  |
| C | 1.504824000000  | -4.654288000000 | 1.957139000000  |
| H | 0.138515000000  | -3.838551000000 | 0.481077000000  |
| H | 0.932419000000  | -5.323585000000 | -0.042918000000 |
| H | 0.995891000000  | -2.718585000000 | 2.791013000000  |
| H | 2.309991000000  | -3.525278000000 | 3.642714000000  |
| H | 0.698927000000  | -5.154046000000 | 2.501753000000  |
| H | 2.366984000000  | -5.334005000000 | 1.966308000000  |
| C | -3.840931000000 | 3.023698000000  | 0.183172000000  |
| C | -2.895746000000 | 2.385943000000  | 2.304131000000  |
| C | -2.982281000000 | 4.278722000000  | 0.104431000000  |
| H | -4.042156000000 | 2.592817000000  | -0.800031000000 |
| H | -4.804664000000 | 3.223804000000  | 0.670994000000  |
| C | -2.000540000000 | 3.616272000000  | 2.338127000000  |
| H | -2.425775000000 | 1.521353000000  | 2.772644000000  |
| H | -3.860813000000 | 2.576609000000  | 2.792720000000  |
| C | -2.611208000000 | 4.760860000000  | 1.515327000000  |
| H | -2.076213000000 | 4.051842000000  | -0.463291000000 |
| H | -3.528800000000 | 5.052835000000  | -0.443348000000 |
| H | -1.024691000000 | 3.345363000000  | 1.929399000000  |
| H | -1.847375000000 | 3.917218000000  | 3.378876000000  |
| H | -1.909631000000 | 5.596179000000  | 1.453322000000  |
| H | -3.510804000000 | 5.134343000000  | 2.021783000000  |
| O | -3.165609000000 | 1.988645000000  | 0.935102000000  |
| O | 2.377057000000  | -2.314317000000 | 0.484958000000  |
| C | 3.250918000000  | -0.840756000000 | -2.726066000000 |
| C | 3.429830000000  | 1.457555000000  | -2.057339000000 |
| C | 4.723138000000  | -1.108183000000 | -2.439072000000 |
| H | 2.621655000000  | -1.712389000000 | -2.550703000000 |
| H | 3.097934000000  | -0.523144000000 | -3.766052000000 |
| C | 4.918605000000  | 1.314569000000  | -1.769116000000 |
| H | 2.950272000000  | 2.162911000000  | -1.380100000000 |
| H | 3.239768000000  | 1.780124000000  | -3.089049000000 |
| C | 5.535300000000  | 0.184922000000  | -2.606959000000 |
| H | 4.811568000000  | -1.476484000000 | -1.411324000000 |
| H | 5.087918000000  | -1.894871000000 | -3.107677000000 |
| H | 5.036942000000  | 1.105848000000  | -0.701929000000 |
| H | 5.413727000000  | 2.269566000000  | -1.971504000000 |
| H | 6.578100000000  | 0.022985000000  | -2.320599000000 |
| H | 5.536786000000  | 0.470954000000  | -3.666951000000 |
| C | -5.132567000000 | -0.371843000000 | 0.071512000000  |
| C | -4.449135000000 | -0.867754000000 | -2.181007000000 |
| C | -5.322007000000 | -1.846783000000 | 0.401591000000  |
| H | -4.796502000000 | 0.207784000000  | 0.930066000000  |



|   |                 |                 |                 |
|---|-----------------|-----------------|-----------------|
| H | -6.064215000000 | 0.071879000000  | -0.304993000000 |
| C | -4.629194000000 | -2.364168000000 | -1.961968000000 |
| H | -3.623392000000 | -0.662810000000 | -2.862030000000 |
| H | -5.364427000000 | -0.405271000000 | -2.573764000000 |
| C | -5.669494000000 | -2.637253000000 | -0.867322000000 |
| H | -4.394299000000 | -2.225794000000 | 0.842703000000  |
| H | -6.106514000000 | -1.945616000000 | 1.158428000000  |
| H | -3.659713000000 | -2.785998000000 | -1.681983000000 |
| H | -4.921121000000 | -2.827097000000 | -2.909573000000 |
| H | -5.722281000000 | -3.707164000000 | -0.650114000000 |
| H | -6.663937000000 | -2.335035000000 | -1.220249000000 |
| O | -4.111141000000 | -0.197530000000 | -0.939367000000 |
| O | 2.752644000000  | 0.192485000000  | -1.858192000000 |

### Ca-Tetra\_EQ656

( $E_{el} = -3295.552147$  a.u.;  $G = -3294.157224$  a.u.)

0 1

|    |                 |                 |                 |
|----|-----------------|-----------------|-----------------|
| Ca | 1.763270000000  | -2.150917000000 | 0.837352000000  |
| I  | 0.915250000000  | -1.312828000000 | -2.117219000000 |
| I  | -1.268969000000 | -1.646743000000 | 1.759514000000  |
| Ca | -2.235871000000 | -0.845856000000 | -1.458219000000 |
| C  | 1.294346000000  | -4.568935000000 | 0.635739000000  |
| C  | 0.848112000000  | -5.485579000000 | 1.611875000000  |
| C  | 1.490224000000  | -5.144929000000 | -0.641426000000 |
| C  | 0.646597000000  | -6.846796000000 | 1.364003000000  |
| H  | 0.632038000000  | -5.136069000000 | 2.620933000000  |
| C  | 1.289264000000  | -6.499153000000 | -0.923296000000 |
| H  | 1.801607000000  | -4.507453000000 | -1.468867000000 |
| C  | 0.873346000000  | -7.363904000000 | 0.088914000000  |
| H  | 0.305158000000  | -7.502949000000 | 2.160528000000  |
| H  | 1.455946000000  | -6.879822000000 | -1.927667000000 |
| H  | 0.718949000000  | -8.418666000000 | -0.114511000000 |
| C  | -3.084527000000 | -0.599206000000 | -3.736458000000 |
| C  | -2.669206000000 | -1.550346000000 | -4.694832000000 |
| C  | -4.087274000000 | 0.282892000000  | -4.193050000000 |
| C  | -3.195694000000 | -1.626802000000 | -5.987555000000 |
| H  | -1.891194000000 | -2.268626000000 | -4.429214000000 |
| C  | -4.635093000000 | 0.229699000000  | -5.478337000000 |
| H  | -4.462806000000 | 1.058673000000  | -3.525594000000 |
| C  | -4.189808000000 | -0.732448000000 | -6.384947000000 |
| H  | -2.832673000000 | -2.377743000000 | -6.684887000000 |
| H  | -5.406242000000 | 0.936173000000  | -5.775208000000 |
| H  | -4.608088000000 | -0.782308000000 | -7.385279000000 |
| C  | -3.787329000000 | -3.697686000000 | -2.270904000000 |

|   |                 |                 |                 |
|---|-----------------|-----------------|-----------------|
| C | -1.680313000000 | -4.159724000000 | -1.192133000000 |
| C | -4.485858000000 | -4.798714000000 | -1.481296000000 |
| H | -4.438284000000 | -2.851830000000 | -2.490468000000 |
| H | -3.406593000000 | -4.076133000000 | -3.227240000000 |
| C | -2.288977000000 | -5.263701000000 | -0.346149000000 |
| H | -0.887720000000 | -3.643890000000 | -0.658254000000 |
| H | -1.262556000000 | -4.552197000000 | -2.127101000000 |
| C | -3.488413000000 | -5.889993000000 | -1.067990000000 |
| H | -4.943617000000 | -4.363286000000 | -0.587470000000 |
| H | -5.296185000000 | -5.209838000000 | -2.092274000000 |
| H | -2.602028000000 | -4.831797000000 | 0.610645000000  |
| H | -1.515591000000 | -6.002537000000 | -0.129931000000 |
| H | -3.976626000000 | -6.635291000000 | -0.433619000000 |
| H | -3.135421000000 | -6.417267000000 | -1.963392000000 |
| C | 4.815192000000  | -1.297807000000 | -0.436151000000 |
| C | 4.607087000000  | -3.692163000000 | -0.233074000000 |
| C | 5.095893000000  | -1.400393000000 | -1.927151000000 |
| H | 4.259391000000  | -0.391758000000 | -0.202607000000 |
| H | 5.747319000000  | -1.294208000000 | 0.145608000000  |
| C | 4.840588000000  | -3.889102000000 | -1.724008000000 |
| H | 3.922775000000  | -4.432297000000 | 0.178411000000  |
| H | 5.561521000000  | -3.738989000000 | 0.310198000000  |
| C | 5.714420000000  | -2.757590000000 | -2.278833000000 |
| H | 4.153803000000  | -1.265404000000 | -2.464451000000 |
| H | 5.744319000000  | -0.571016000000 | -2.215400000000 |
| H | 3.872036000000  | -3.897998000000 | -2.232277000000 |
| H | 5.300773000000  | -4.869981000000 | -1.880802000000 |
| H | 5.829373000000  | -2.853431000000 | -3.361904000000 |
| H | 6.720885000000  | -2.828465000000 | -1.845281000000 |
| O | 4.001380000000  | -2.404772000000 | 0.036911000000  |
| O | -2.674724000000 | -3.155846000000 | -1.524549000000 |
| C | -4.910355000000 | -1.482378000000 | 0.512870000000  |
| C | -5.070722000000 | 0.670145000000  | -0.556581000000 |
| C | -6.321491000000 | -1.855632000000 | 0.072989000000  |
| H | -4.244238000000 | -2.343907000000 | 0.541548000000  |
| H | -4.911970000000 | -1.008645000000 | 1.498961000000  |
| C | -6.474170000000 | 0.377893000000  | -1.064383000000 |
| H | -4.505463000000 | 1.295927000000  | -1.246422000000 |
| H | -5.089053000000 | 1.163544000000  | 0.417165000000  |
| C | -7.182475000000 | -0.599048000000 | -0.116238000000 |
| H | -6.268282000000 | -2.408904000000 | -0.870583000000 |
| H | -6.758839000000 | -2.525949000000 | 0.820401000000  |
| H | -6.406832000000 | -0.046510000000 | -2.071884000000 |
| H | -7.024706000000 | 1.321055000000  | -1.137348000000 |

|    |                 |                 |                 |
|----|-----------------|-----------------|-----------------|
| H  | -8.170155000000 | -0.866706000000 | -0.502479000000 |
| H  | -7.331346000000 | -0.111100000000 | 0.854004000000  |
| C  | -0.036086000000 | 3.122455000000  | -4.362787000000 |
| C  | 1.278822000000  | 1.225100000000  | -5.057207000000 |
| C  | -1.320448000000 | 2.476060000000  | -4.856162000000 |
| H  | -0.195538000000 | 3.733779000000  | -3.475222000000 |
| H  | 0.425815000000  | 3.745325000000  | -5.141868000000 |
| C  | 0.047923000000  | 0.509746000000  | -5.591203000000 |
| H  | 2.005336000000  | 0.525262000000  | -4.643320000000 |
| H  | 1.772360000000  | 1.821928000000  | -5.836470000000 |
| C  | -1.036828000000 | 1.508151000000  | -6.010660000000 |
| H  | -1.782315000000 | 1.927230000000  | -4.032474000000 |
| H  | -2.022514000000 | 3.259796000000  | -5.158644000000 |
| H  | -0.348930000000 | -0.140536000000 | -4.809871000000 |
| H  | 0.342999000000  | -0.131294000000 | -6.428119000000 |
| H  | -1.948235000000 | 0.974332000000  | -6.283061000000 |
| H  | -0.702673000000 | 2.071349000000  | -6.892899000000 |
| O  | 0.932391000000  | 2.118321000000  | -3.969825000000 |
| O  | -4.311654000000 | -0.560149000000 | -0.425146000000 |
| Ca | 1.641180000000  | 1.796040000000  | -1.738154000000 |
| I  | -1.470956000000 | 2.278122000000  | -0.795850000000 |
| I  | 2.053468000000  | 1.228052000000  | 1.455857000000  |
| Ca | -1.151166000000 | 1.465079000000  | 2.270971000000  |
| C  | 4.064737000000  | 1.822557000000  | -2.130024000000 |
| C  | 5.012345000000  | 2.024546000000  | -1.100788000000 |
| C  | 4.621769000000  | 1.792654000000  | -3.427006000000 |
| C  | 6.384396000000  | 2.164294000000  | -1.328984000000 |
| H  | 4.670864000000  | 2.075864000000  | -0.067314000000 |
| C  | 5.988801000000  | 1.931657000000  | -3.686963000000 |
| H  | 3.968924000000  | 1.651536000000  | -4.288107000000 |
| C  | 6.881791000000  | 2.114450000000  | -2.631594000000 |
| H  | 7.066215000000  | 2.314387000000  | -0.495297000000 |
| H  | 6.359505000000  | 1.894970000000  | -4.708257000000 |
| H  | 7.945146000000  | 2.220695000000  | -2.821101000000 |
| C  | -3.558496000000 | 1.752380000000  | 2.680531000000  |
| C  | -4.168273000000 | 2.905303000000  | 2.134058000000  |
| C  | -4.460673000000 | 0.871653000000  | 3.314401000000  |
| C  | -5.539140000000 | 3.169011000000  | 2.210885000000  |
| H  | -3.553837000000 | 3.622596000000  | 1.589114000000  |
| C  | -5.837388000000 | 1.104441000000  | 3.403394000000  |
| H  | -4.088291000000 | -0.059184000000 | 3.743842000000  |
| C  | -6.384673000000 | 2.261817000000  | 2.850055000000  |
| H  | -5.950844000000 | 4.070414000000  | 1.764045000000  |
| H  | -6.484476000000 | 0.383884000000  | 3.897457000000  |

|   |                 |                 |                 |
|---|-----------------|-----------------|-----------------|
| H | -7.451366000000 | 2.451464000000  | 2.912504000000  |
| C | 0.646891000000  | 1.450035000000  | 5.159586000000  |
| C | -1.330950000000 | 0.093962000000  | 5.357860000000  |
| C | 1.547411000000  | 0.285623000000  | 5.547680000000  |
| H | 1.125172000000  | 2.111072000000  | 4.438187000000  |
| H | 0.356419000000  | 2.038963000000  | 6.041137000000  |
| C | -0.517570000000 | -1.122509000000 | 5.781005000000  |
| H | -2.200529000000 | -0.182154000000 | 4.764747000000  |
| H | -1.673518000000 | 0.669551000000  | 6.228469000000  |
| C | 0.787284000000  | -0.686279000000 | 6.460419000000  |
| H | 1.854442000000  | -0.220781000000 | 4.628173000000  |
| H | 2.447855000000  | 0.671733000000  | 6.036065000000  |
| H | -0.298813000000 | -1.713430000000 | 4.886711000000  |
| H | -1.124388000000 | -1.743533000000 | 6.447152000000  |
| H | 1.404742000000  | -1.554902000000 | 6.705010000000  |
| H | 0.557827000000  | -0.189122000000 | 7.411676000000  |
| C | 2.523107000000  | 4.852818000000  | -2.805889000000 |
| C | 1.398237000000  | 5.030352000000  | -0.688618000000 |
| C | 3.837719000000  | 5.343831000000  | -2.213489000000 |
| H | 2.688866000000  | 4.112499000000  | -3.587208000000 |
| H | 1.930691000000  | 5.681793000000  | -3.217199000000 |
| C | 2.675943000000  | 5.465337000000  | 0.018104000000  |
| H | 0.740629000000  | 4.438336000000  | -0.053580000000 |
| H | 0.828219000000  | 5.897513000000  | -1.049613000000 |
| C | 3.594313000000  | 6.204310000000  | -0.966032000000 |
| H | 4.444255000000  | 4.473164000000  | -1.957340000000 |
| H | 4.378331000000  | 5.908197000000  | -2.979886000000 |
| H | 3.178063000000  | 4.572901000000  | 0.406369000000  |
| H | 2.422755000000  | 6.101689000000  | 0.871470000000  |
| H | 4.545140000000  | 6.454535000000  | -0.488201000000 |
| H | 3.121657000000  | 7.152926000000  | -1.253195000000 |
| O | 1.708377000000  | 4.185925000000  | -1.810995000000 |
| O | -0.549616000000 | 0.971003000000  | 4.519209000000  |
| C | -1.511576000000 | 4.079778000000  | 4.294685000000  |
| C | 0.343491000000  | 4.588646000000  | 2.856929000000  |
| C | -2.201342000000 | 5.395923000000  | 3.961325000000  |
| H | -2.233272000000 | 3.280648000000  | 4.458455000000  |
| H | -0.869643000000 | 4.179591000000  | 5.181073000000  |
| C | -0.275823000000 | 5.911352000000  | 2.423542000000  |
| H | 0.939688000000  | 4.120943000000  | 2.075261000000  |
| H | 0.991020000000  | 4.729694000000  | 3.734296000000  |
| C | -1.182045000000 | 6.460490000000  | 3.534406000000  |
| H | -2.918704000000 | 5.213252000000  | 3.157508000000  |
| H | -2.773335000000 | 5.725064000000  | 4.834400000000  |

|   |                 |                 |                |
|---|-----------------|-----------------|----------------|
| H | -0.858384000000 | 5.741717000000  | 1.511778000000 |
| H | 0.519425000000  | 6.622121000000  | 2.179763000000 |
| H | -1.692468000000 | 7.367741000000  | 3.200613000000 |
| H | -0.562638000000 | 6.742590000000  | 4.395548000000 |
| C | 4.020718000000  | -1.597713000000 | 3.350288000000 |
| C | 2.290455000000  | -3.145260000000 | 3.974116000000 |
| C | 5.074080000000  | -2.697531000000 | 3.343161000000 |
| H | 4.214271000000  | -0.830740000000 | 2.601418000000 |
| H | 3.966192000000  | -1.110054000000 | 4.332055000000 |
| C | 3.254731000000  | -4.322754000000 | 3.964965000000 |
| H | 1.284014000000  | -3.428402000000 | 3.666887000000 |
| H | 2.233211000000  | -2.689601000000 | 4.969833000000 |
| C | 4.677197000000  | -3.842837000000 | 4.285370000000 |
| H | 5.168610000000  | -3.072865000000 | 2.322780000000 |
| H | 6.039683000000  | -2.267292000000 | 3.627312000000 |
| H | 3.216297000000  | -4.790527000000 | 2.977017000000 |
| H | 2.916073000000  | -5.069401000000 | 4.689805000000 |
| H | 5.388458000000  | -4.668814000000 | 4.202581000000 |
| H | 4.718663000000  | -3.490451000000 | 5.324187000000 |
| O | 2.712820000000  | -2.126796000000 | 3.040173000000 |
| O | -0.680476000000 | 3.635575000000  | 3.194325000000 |

### Ca-Tetra\_EQ45

( $E_{el}$  = -3295.520936 a.u.;  $G$  = -3294.133847 a.u.)

0 1

|    |                |                 |                 |
|----|----------------|-----------------|-----------------|
| Ca | 4.482107000000 | -1.277329000000 | -0.308800000000 |
| I  | 4.707700000000 | 1.815308000000  | -0.657728000000 |
| I  | 1.638710000000 | -0.851205000000 | 1.024680000000  |
| Ca | 1.473745000000 | 2.105368000000  | -0.120114000000 |
| C  | 3.563465000000 | -3.316103000000 | -1.333279000000 |
| C  | 2.869012000000 | -4.175423000000 | -0.451592000000 |
| C  | 3.520431000000 | -3.725379000000 | -2.683882000000 |
| C  | 2.197915000000 | -5.328929000000 | -0.863733000000 |
| H  | 2.820346000000 | -3.929412000000 | 0.610160000000  |
| C  | 2.835895000000 | -4.860278000000 | -3.129710000000 |
| H  | 4.044485000000 | -3.139564000000 | -3.439039000000 |
| C  | 2.169103000000 | -5.672302000000 | -2.214309000000 |
| H  | 1.690903000000 | -5.957099000000 | -0.136740000000 |
| H  | 2.825807000000 | -5.114104000000 | -4.186516000000 |
| H  | 1.637509000000 | -6.557966000000 | -2.546308000000 |
| C  | 1.931572000000 | 3.142769000000  | 2.052292000000  |
| C  | 3.130459000000 | 3.012092000000  | 2.787033000000  |
| C  | 0.964785000000 | 3.967982000000  | 2.669235000000  |
| C  | 3.356658000000 | 3.642003000000  | 4.014366000000  |

|   |                 |                 |                 |
|---|-----------------|-----------------|-----------------|
| H | 3.934611000000  | 2.401358000000  | 2.379859000000  |
| C | 1.166890000000  | 4.621647000000  | 3.888834000000  |
| H | 0.000637000000  | 4.112008000000  | 2.180407000000  |
| C | 2.372727000000  | 4.459969000000  | 4.570587000000  |
| H | 4.303350000000  | 3.508028000000  | 4.533194000000  |
| H | 0.384954000000  | 5.248117000000  | 4.311143000000  |
| H | 2.541986000000  | 4.961471000000  | 5.518373000000  |
| C | 2.173585000000  | 5.265775000000  | -0.892049000000 |
| C | -0.067787000000 | 4.798298000000  | -1.652502000000 |
| C | 1.676688000000  | 6.333697000000  | 0.072434000000  |
| H | 3.038457000000  | 4.735020000000  | -0.492204000000 |
| H | 2.442264000000  | 5.694366000000  | -1.867712000000 |
| C | -0.668107000000 | 5.810040000000  | -0.688642000000 |
| H | -0.728038000000 | 3.946377000000  | -1.813371000000 |
| H | 0.153886000000  | 5.263202000000  | -2.624191000000 |
| C | 0.342692000000  | 6.928863000000  | -0.399882000000 |
| H | 1.558902000000  | 5.875741000000  | 1.056775000000  |
| H | 2.444239000000  | 7.109374000000  | 0.159664000000  |
| H | -0.936884000000 | 5.288748000000  | 0.234603000000  |
| H | -1.592341000000 | 6.208088000000  | -1.118644000000 |
| H | -0.052918000000 | 7.615188000000  | 0.353181000000  |
| H | 0.501490000000  | 7.516266000000  | -1.314051000000 |
| C | 5.190871000000  | -2.821000000000 | 2.563937000000  |
| C | 5.541505000000  | -0.436598000000 | 2.775857000000  |
| C | 4.095793000000  | -2.804299000000 | 3.623985000000  |
| H | 4.998395000000  | -3.566249000000 | 1.788734000000  |
| H | 6.172731000000  | -3.029128000000 | 3.008973000000  |
| C | 4.470210000000  | -0.321048000000 | 3.850800000000  |
| H | 5.573943000000  | 0.449894000000  | 2.140879000000  |
| H | 6.535980000000  | -0.598438000000 | 3.211852000000  |
| C | 4.316163000000  | -1.646571000000 | 4.608743000000  |
| H | 3.129639000000  | -2.687620000000 | 3.124926000000  |
| H | 4.089780000000  | -3.768948000000 | 4.141431000000  |
| H | 3.526632000000  | -0.042167000000 | 3.378313000000  |
| H | 4.737214000000  | 0.495025000000  | 4.528205000000  |
| H | 3.482560000000  | -1.584634000000 | 5.313169000000  |
| H | 5.219450000000  | -1.840327000000 | 5.201597000000  |
| O | 5.269200000000  | -1.548932000000 | 1.879978000000  |
| O | 1.161428000000  | 4.251340000000  | -1.123348000000 |
| C | 1.775868000000  | -0.049505000000 | -2.961612000000 |
| C | 1.626138000000  | 2.250768000000  | -3.620169000000 |
| C | 3.075194000000  | -0.234916000000 | -3.737919000000 |
| H | 1.759341000000  | -0.662266000000 | -2.060832000000 |
| H | 0.915867000000  | -0.335800000000 | -3.577284000000 |

|    |                 |                 |                 |
|----|-----------------|-----------------|-----------------|
| C  | 2.945621000000  | 2.179872000000  | -4.378714000000 |
| H  | 1.474971000000  | 3.228979000000  | -3.172405000000 |
| H  | 0.786219000000  | 2.032859000000  | -4.290554000000 |
| C  | 3.177037000000  | 0.757531000000  | -4.900700000000 |
| H  | 3.923244000000  | -0.073179000000 | -3.065145000000 |
| H  | 3.117129000000  | -1.269089000000 | -4.085249000000 |
| H  | 3.756421000000  | 2.466634000000  | -3.702860000000 |
| H  | 2.919274000000  | 2.904272000000  | -5.199444000000 |
| H  | 4.151783000000  | 0.675924000000  | -5.390073000000 |
| H  | 2.418964000000  | 0.515945000000  | -5.656981000000 |
| C  | 7.670671000000  | -0.533214000000 | -1.299172000000 |
| C  | 6.899905000000  | -2.609378000000 | -2.232315000000 |
| C  | 7.759447000000  | 0.119566000000  | -2.672818000000 |
| H  | 7.397585000000  | 0.189152000000  | -0.530570000000 |
| H  | 8.618413000000  | -1.011440000000 | -1.019155000000 |
| C  | 6.932027000000  | -2.051393000000 | -3.649340000000 |
| H  | 6.102549000000  | -3.336741000000 | -2.090185000000 |
| H  | 7.859983000000  | -3.071200000000 | -1.966955000000 |
| C  | 7.980742000000  | -0.935836000000 | -3.765707000000 |
| H  | 6.827250000000  | 0.664588000000  | -2.850326000000 |
| H  | 8.568085000000  | 0.856914000000  | -2.665836000000 |
| H  | 5.938304000000  | -1.657767000000 | -3.889661000000 |
| H  | 7.136830000000  | -2.865258000000 | -4.351470000000 |
| H  | 7.942962000000  | -0.473541000000 | -4.755738000000 |
| H  | 8.982282000000  | -1.370875000000 | -3.656873000000 |
| O  | 6.636730000000  | -1.546544000000 | -1.281795000000 |
| O  | 1.585116000000  | 1.314300000000  | -2.521846000000 |
| Ca | -1.583202000000 | -1.109489000000 | 1.389129000000  |
| I  | -1.701365000000 | 1.868439000000  | 0.278399000000  |
| I  | -4.552968000000 | -1.455047000000 | 2.133773000000  |
| Ca | -4.308013000000 | -0.048027000000 | -0.787804000000 |
| C  | -2.289287000000 | -1.828228000000 | -0.964238000000 |
| C  | -2.995951000000 | -3.027773000000 | -1.216029000000 |
| C  | -1.032973000000 | -1.748197000000 | -1.608530000000 |
| C  | -2.511700000000 | -4.041736000000 | -2.047752000000 |
| H  | -3.958762000000 | -3.182707000000 | -0.729905000000 |
| C  | -0.494078000000 | -2.775287000000 | -2.389622000000 |
| H  | -0.437232000000 | -0.847846000000 | -1.477323000000 |
| C  | -1.244967000000 | -3.926496000000 | -2.621344000000 |
| H  | -3.102717000000 | -4.937651000000 | -2.219741000000 |
| H  | 0.509126000000  | -2.701394000000 | -2.797432000000 |
| H  | -0.834270000000 | -4.729692000000 | -3.223140000000 |
| C  | -5.839442000000 | 1.835797000000  | -0.344265000000 |
| C  | -5.643977000000 | 2.724307000000  | 0.736718000000  |

|   |                 |                 |                 |
|---|-----------------|-----------------|-----------------|
| C | -7.042699000000 | 2.047736000000  | -1.052992000000 |
| C | -6.551879000000 | 3.729298000000  | 1.081110000000  |
| H | -4.743341000000 | 2.632425000000  | 1.343026000000  |
| C | -7.970561000000 | 3.044412000000  | -0.732593000000 |
| H | -7.277337000000 | 1.409419000000  | -1.907746000000 |
| C | -7.724867000000 | 3.894528000000  | 0.343923000000  |
| H | -6.348259000000 | 4.384508000000  | 1.924720000000  |
| H | -8.881243000000 | 3.157527000000  | -1.316619000000 |
| H | -8.435866000000 | 4.672071000000  | 0.605909000000  |
| C | -2.959609000000 | -0.035489000000 | -3.970500000000 |
| C | -4.476525000000 | 1.781491000000  | -3.580882000000 |
| C | -1.753736000000 | 0.896165000000  | -3.984729000000 |
| H | -2.702110000000 | -1.012999000000 | -3.564860000000 |
| H | -3.371351000000 | -0.162903000000 | -4.981656000000 |
| C | -3.345828000000 | 2.800684000000  | -3.556356000000 |
| H | -5.278861000000 | 2.061285000000  | -2.902273000000 |
| H | -4.880337000000 | 1.653890000000  | -4.594797000000 |
| C | -2.162637000000 | 2.315707000000  | -4.404241000000 |
| H | -1.316014000000 | 0.913667000000  | -2.982464000000 |
| H | -1.002554000000 | 0.484109000000  | -4.665867000000 |
| H | -3.036570000000 | 2.936122000000  | -2.515121000000 |
| H | -3.723139000000 | 3.763250000000  | -3.915149000000 |
| H | -1.317146000000 | 3.002777000000  | -4.307024000000 |
| H | -2.450114000000 | 2.314703000000  | -5.463622000000 |
| C | -0.303459000000 | -4.229958000000 | 1.370187000000  |
| C | -1.488908000000 | -3.746064000000 | 3.423885000000  |
| C | -1.204725000000 | -5.423118000000 | 1.083996000000  |
| H | 0.009571000000  | -3.725379000000 | 0.457165000000  |
| H | 0.598029000000  | -4.529199000000 | 1.921328000000  |
| C | -2.439772000000 | -4.914582000000 | 3.209813000000  |
| H | -1.984477000000 | -2.903493000000 | 3.906120000000  |
| H | -0.620879000000 | -4.043112000000 | 4.028934000000  |
| C | -1.758313000000 | -6.015228000000 | 2.385951000000  |
| H | -2.024543000000 | -5.085328000000 | 0.446359000000  |
| H | -0.636912000000 | -6.164473000000 | 0.514643000000  |
| H | -3.325769000000 | -4.540308000000 | 2.688024000000  |
| H | -2.765680000000 | -5.290322000000 | 4.184980000000  |
| H | -2.462594000000 | -6.823292000000 | 2.170144000000  |
| H | -0.938148000000 | -6.455042000000 | 2.968938000000  |
| O | -0.999696000000 | -3.237885000000 | 2.162657000000  |
| O | -4.001903000000 | 0.490092000000  | -3.123944000000 |
| C | -5.999859000000 | -2.219796000000 | -2.786228000000 |
| C | -7.208256000000 | -1.748539000000 | -0.753684000000 |
| C | -7.217304000000 | -1.909844000000 | -3.647916000000 |



|   |                 |                 |                 |
|---|-----------------|-----------------|-----------------|
| H | -5.068194000000 | -1.940613000000 | -3.276429000000 |
| H | -5.951323000000 | -3.289473000000 | -2.540612000000 |
| C | -8.490195000000 | -1.458977000000 | -1.524457000000 |
| H | -7.113977000000 | -1.115974000000 | 0.127797000000  |
| H | -7.156169000000 | -2.798224000000 | -0.436188000000 |
| C | -8.506729000000 | -2.201490000000 | -2.867628000000 |
| H | -7.181964000000 | -0.852498000000 | -3.931949000000 |
| H | -7.168681000000 | -2.501410000000 | -4.567986000000 |
| H | -8.559485000000 | -0.380521000000 | -1.688338000000 |
| H | -9.344829000000 | -1.747926000000 | -0.904862000000 |
| H | -9.384737000000 | -1.915668000000 | -3.453363000000 |
| H | -8.581128000000 | -3.281931000000 | -2.688785000000 |
| C | -2.042331000000 | 0.604904000000  | 4.258563000000  |
| C | -0.050253000000 | -0.739991000000 | 4.427631000000  |
| C | -1.260832000000 | 1.875156000000  | 4.550813000000  |
| H | -2.870665000000 | 0.774282000000  | 3.572128000000  |
| H | -2.446976000000 | 0.152613000000  | 5.173465000000  |
| C | 0.812827000000  | 0.479054000000  | 4.719304000000  |
| H | 0.488174000000  | -1.499415000000 | 3.860567000000  |
| H | -0.423196000000 | -1.194068000000 | 5.356785000000  |
| C | -0.019185000000 | 1.573473000000  | 5.398531000000  |
| H | -0.954953000000 | 2.322521000000  | 3.602548000000  |
| H | -1.920992000000 | 2.589453000000  | 5.053088000000  |
| H | 1.222245000000  | 0.862985000000  | 3.781253000000  |
| H | 1.657726000000  | 0.177566000000  | 5.347442000000  |
| H | 0.582086000000  | 2.474803000000  | 5.521860000000  |
| H | -0.327768000000 | 1.237068000000  | 6.397885000000  |
| O | -1.192691000000 | -0.384807000000 | 3.617121000000  |
| O | -6.040306000000 | -1.468353000000 | -1.561529000000 |

### Ca-Tetra\_EQ406

( $E_{el}$  = -3295.546275 a.u.;  $G$  = -3294.152708 a.u.)

0 1

|    |                |                 |                 |
|----|----------------|-----------------|-----------------|
| Ca | 0.450127000000 | 1.523117000000  | 2.565324000000  |
| I  | 1.928598000000 | 1.909403000000  | -0.241928000000 |
| I  | 0.538449000000 | -1.629530000000 | 2.089359000000  |
| Ca | 2.351701000000 | -1.295020000000 | -0.654562000000 |
| C  | 2.570760000000 | 1.595250000000  | 3.796503000000  |
| C  | 2.948417000000 | 0.808807000000  | 4.907121000000  |
| C  | 3.615031000000 | 2.392436000000  | 3.272999000000  |
| C  | 4.240856000000 | 0.793857000000  | 5.441537000000  |
| H  | 2.213616000000 | 0.156462000000  | 5.378081000000  |
| C  | 4.914822000000 | 2.402553000000  | 3.788884000000  |
| H  | 3.419142000000 | 3.023517000000  | 2.406645000000  |

|   |                 |                 |                 |
|---|-----------------|-----------------|-----------------|
| C | 5.235884000000  | 1.593492000000  | 4.878889000000  |
| H | 4.474173000000  | 0.161309000000  | 6.294371000000  |
| H | 5.677349000000  | 3.035386000000  | 3.341278000000  |
| H | 6.242169000000  | 1.589528000000  | 5.285661000000  |
| C | 3.622648000000  | -1.553168000000 | -2.757010000000 |
| C | 2.981559000000  | -2.097616000000 | -3.893417000000 |
| C | 5.024387000000  | -1.440409000000 | -2.895969000000 |
| C | 3.655224000000  | -2.502852000000 | -5.048575000000 |
| H | 1.899579000000  | -2.220390000000 | -3.885303000000 |
| C | 5.726052000000  | -1.828337000000 | -4.041883000000 |
| H | 5.617188000000  | -1.043043000000 | -2.074726000000 |
| C | 5.040743000000  | -2.368609000000 | -5.129010000000 |
| H | 3.101038000000  | -2.916758000000 | -5.887402000000 |
| H | 6.806260000000  | -1.714937000000 | -4.085581000000 |
| H | 5.575714000000  | -2.677520000000 | -6.021283000000 |
| C | 5.126971000000  | 0.147467000000  | 0.388331000000  |
| C | 4.355748000000  | -1.184997000000 | 2.217982000000  |
| C | 6.571756000000  | -0.279660000000 | 0.608462000000  |
| H | 4.911752000000  | 0.348888000000  | -0.660689000000 |
| H | 4.883698000000  | 1.042873000000  | 0.969075000000  |
| C | 5.762976000000  | -1.667076000000 | 2.542422000000  |
| H | 3.600193000000  | -1.930534000000 | 2.454615000000  |
| H | 4.109177000000  | -0.275366000000 | 2.768186000000  |
| C | 6.803643000000  | -0.637617000000 | 2.082778000000  |
| H | 6.788386000000  | -1.143595000000 | -0.029711000000 |
| H | 7.232358000000  | 0.533898000000  | 0.291974000000  |
| H | 5.942656000000  | -2.628639000000 | 2.048996000000  |
| H | 5.828901000000  | -1.830619000000 | 3.622251000000  |
| H | 7.817260000000  | -1.020606000000 | 2.231930000000  |
| H | 6.700389000000  | 0.264147000000  | 2.695208000000  |
| C | -0.845460000000 | 0.165525000000  | 5.337013000000  |
| C | -2.288898000000 | 1.916806000000  | 4.520063000000  |
| C | -1.966046000000 | -0.859182000000 | 5.267166000000  |
| H | 0.123847000000  | -0.277779000000 | 5.110224000000  |
| H | -0.787571000000 | 0.643521000000  | 6.324076000000  |
| C | -3.472011000000 | 0.964118000000  | 4.428957000000  |
| H | -2.304052000000 | 2.669607000000  | 3.731216000000  |
| H | -2.255389000000 | 2.426484000000  | 5.492988000000  |
| C | -3.334170000000 | -0.187028000000 | 5.433397000000  |
| H | -1.927451000000 | -1.360545000000 | 4.297355000000  |
| H | -1.804011000000 | -1.622170000000 | 6.035295000000  |
| H | -3.515747000000 | 0.554753000000  | 3.418082000000  |
| H | -4.397109000000 | 1.526245000000  | 4.593329000000  |
| H | -4.129380000000 | -0.917363000000 | 5.274955000000  |

|    |                 |                 |                 |
|----|-----------------|-----------------|-----------------|
| H  | -3.435038000000 | 0.199467000000  | 6.456775000000  |
| O  | -1.039851000000 | 1.206578000000  | 4.349289000000  |
| O  | 4.217710000000  | -0.909149000000 | 0.795664000000  |
| C  | 3.008968000000  | -4.360363000000 | 0.689373000000  |
| C  | 2.339432000000  | -4.594877000000 | -1.597210000000 |
| C  | 4.461217000000  | -4.676214000000 | 0.358373000000  |
| H  | 2.903724000000  | -3.668281000000 | 1.522614000000  |
| H  | 2.456208000000  | -5.275932000000 | 0.942730000000  |
| C  | 3.747115000000  | -4.984663000000 | -2.030704000000 |
| H  | 1.823312000000  | -4.032781000000 | -2.373819000000 |
| H  | 1.741415000000  | -5.481234000000 | -1.341799000000 |
| C  | 4.531013000000  | -5.600998000000 | -0.864505000000 |
| H  | 4.977827000000  | -3.734855000000 | 0.146778000000  |
| H  | 4.940811000000  | -5.129906000000 | 1.231523000000  |
| H  | 4.254270000000  | -4.088895000000 | -2.394297000000 |
| H  | 3.674196000000  | -5.681364000000 | -2.871515000000 |
| H  | 5.569925000000  | -5.774491000000 | -1.156505000000 |
| H  | 4.105854000000  | -6.578538000000 | -0.601104000000 |
| C  | -0.407543000000 | 4.658744000000  | 1.701027000000  |
| C  | 0.349898000000  | 4.513949000000  | 3.996518000000  |
| C  | 0.697777000000  | 5.634876000000  | 1.339208000000  |
| H  | -0.647593000000 | 4.001021000000  | 0.870519000000  |
| H  | -1.325506000000 | 5.181273000000  | 1.996455000000  |
| C  | 1.478630000000  | 5.502425000000  | 3.730475000000  |
| H  | 0.646429000000  | 3.752541000000  | 4.719208000000  |
| H  | -0.550901000000 | 5.026909000000  | 4.361024000000  |
| C  | 1.119692000000  | 6.444361000000  | 2.572037000000  |
| H  | 1.548046000000  | 5.064745000000  | 0.950630000000  |
| H  | 0.340930000000  | 6.276616000000  | 0.530565000000  |
| H  | 2.381359000000  | 4.933448000000  | 3.491040000000  |
| H  | 1.680844000000  | 6.061323000000  | 4.650087000000  |
| H  | 1.966252000000  | 7.094442000000  | 2.334354000000  |
| H  | 0.292301000000  | 7.099435000000  | 2.874985000000  |
| O  | -0.005257000000 | 3.794332000000  | 2.795386000000  |
| O  | 2.356438000000  | -3.731449000000 | -0.433675000000 |
| Ca | -0.657526000000 | 2.176458000000  | -2.034667000000 |
| I  | -0.524946000000 | -1.149871000000 | -2.271873000000 |
| I  | -2.468628000000 | 1.414816000000  | 0.554352000000  |
| Ca | -2.218618000000 | -1.774137000000 | 0.511346000000  |
| C  | -1.006884000000 | 4.593327000000  | -1.746162000000 |
| C  | -2.108578000000 | 5.140603000000  | -1.049443000000 |
| C  | -0.140278000000 | 5.558861000000  | -2.302906000000 |
| C  | -2.328022000000 | 6.513226000000  | -0.904657000000 |
| H  | -2.825824000000 | 4.466664000000  | -0.579984000000 |

|   |                 |                 |                 |
|---|-----------------|-----------------|-----------------|
| C | -0.334439000000 | 6.938556000000  | -2.176209000000 |
| H | 0.737689000000  | 5.232863000000  | -2.859968000000 |
| C | -1.434433000000 | 7.423600000000  | -1.470105000000 |
| H | -3.191978000000 | 6.875052000000  | -0.352507000000 |
| H | 0.371879000000  | 7.634779000000  | -2.621416000000 |
| H | -1.593178000000 | 8.491869000000  | -1.362393000000 |
| C | -3.687409000000 | -2.342113000000 | 2.384945000000  |
| C | -3.601721000000 | -3.404424000000 | 3.308961000000  |
| C | -4.907336000000 | -1.630320000000 | 2.434535000000  |
| C | -4.626542000000 | -3.738763000000 | 4.199667000000  |
| H | -2.690123000000 | -4.001855000000 | 3.355764000000  |
| C | -5.950321000000 | -1.939618000000 | 3.312669000000  |
| H | -5.056240000000 | -0.780152000000 | 1.765362000000  |
| C | -5.812975000000 | -3.005035000000 | 4.202684000000  |
| H | -4.502366000000 | -4.566787000000 | 4.893152000000  |
| H | -6.863656000000 | -1.349742000000 | 3.310854000000  |
| H | -6.613870000000 | -3.255202000000 | 4.891063000000  |
| C | -1.647783000000 | -4.573135000000 | -1.389431000000 |
| C | -0.912925000000 | -4.857149000000 | 0.884844000000  |
| C | -2.160800000000 | -6.006770000000 | -1.456380000000 |
| H | -2.254483000000 | -3.888389000000 | -1.979907000000 |
| H | -0.616043000000 | -4.503033000000 | -1.751841000000 |
| C | -1.404425000000 | -6.297131000000 | 0.918215000000  |
| H | -1.016354000000 | -4.372335000000 | 1.853512000000  |
| H | 0.138087000000  | -4.789662000000 | 0.581263000000  |
| C | -1.382049000000 | -6.907186000000 | -0.488879000000 |
| H | -3.224258000000 | -6.020772000000 | -1.196455000000 |
| H | -2.074150000000 | -6.364418000000 | -2.487277000000 |
| H | -2.423958000000 | -6.309230000000 | 1.317953000000  |
| H | -0.777187000000 | -6.870135000000 | 1.608316000000  |
| H | -1.799752000000 | -7.917404000000 | -0.480798000000 |
| H | -0.342985000000 | -6.994629000000 | -0.831110000000 |
| C | -2.544780000000 | 3.313353000000  | -4.533886000000 |
| C | -3.495461000000 | 1.250642000000  | -3.738629000000 |
| C | -3.764144000000 | 4.109561000000  | -4.091132000000 |
| H | -1.629998000000 | 3.894210000000  | -4.422120000000 |
| H | -2.637065000000 | 2.976277000000  | -5.575595000000 |
| C | -4.735693000000 | 1.959439000000  | -3.209197000000 |
| H | -3.208054000000 | 0.386857000000  | -3.139503000000 |
| H | -3.644411000000 | 0.911724000000  | -4.773317000000 |
| C | -5.014616000000 | 3.222082000000  | -4.037250000000 |
| H | -3.553002000000 | 4.530617000000  | -3.105687000000 |
| H | -3.905450000000 | 4.948668000000  | -4.779467000000 |
| H | -4.561968000000 | 2.223022000000  | -2.160359000000 |

|   |                 |                 |                 |
|---|-----------------|-----------------|-----------------|
| H | -5.588410000000 | 1.275480000000  | -3.241503000000 |
| H | -5.856565000000 | 3.777298000000  | -3.615541000000 |
| H | -5.304969000000 | 2.926906000000  | -5.054197000000 |
| O | -2.360816000000 | 2.135923000000  | -3.706985000000 |
| O | -1.692598000000 | -4.063972000000 | -0.038936000000 |
| C | -4.897200000000 | -3.464747000000 | -0.515557000000 |
| C | -4.999069000000 | -1.234845000000 | -1.380199000000 |
| C | -5.456730000000 | -4.054971000000 | -1.803676000000 |
| H | -4.193218000000 | -4.126046000000 | -0.015325000000 |
| H | -5.687896000000 | -3.220328000000 | 0.202015000000  |
| C | -5.558189000000 | -1.707411000000 | -2.716721000000 |
| H | -4.376082000000 | -0.346342000000 | -1.471574000000 |
| H | -5.804697000000 | -1.008156000000 | -0.669975000000 |
| C | -6.327309000000 | -3.024405000000 | -2.536587000000 |
| H | -4.625737000000 | -4.361416000000 | -2.448276000000 |
| H | -6.032471000000 | -4.954719000000 | -1.564905000000 |
| H | -4.724864000000 | -1.849210000000 | -3.413781000000 |
| H | -6.209069000000 | -0.933892000000 | -3.134293000000 |
| H | -6.654835000000 | -3.413763000000 | -3.504360000000 |
| H | -7.232073000000 | -2.833408000000 | -1.946771000000 |
| C | 0.475050000000  | 1.695894000000  | -5.215901000000 |
| C | 2.071396000000  | 2.934347000000  | -3.917847000000 |
| C | 1.486692000000  | 0.597338000000  | -5.505057000000 |
| H | -0.537637000000 | 1.304216000000  | -5.128466000000 |
| H | 0.487100000000  | 2.471643000000  | -5.994356000000 |
| C | 3.147310000000  | 1.879704000000  | -4.129171000000 |
| H | 2.157764000000  | 3.416310000000  | -2.945236000000 |
| H | 2.106344000000  | 3.708841000000  | -4.696012000000 |
| C | 2.922997000000  | 1.132092000000  | -5.449151000000 |
| H | 1.363620000000  | -0.186990000000 | -4.756925000000 |
| H | 1.266182000000  | 0.155341000000  | -6.482544000000 |
| H | 3.119847000000  | 1.166795000000  | -3.300270000000 |
| H | 4.129671000000  | 2.362320000000  | -4.110344000000 |
| H | 3.631427000000  | 0.306447000000  | -5.537983000000 |
| H | 3.096887000000  | 1.812992000000  | -6.293277000000 |
| O | 0.751459000000  | 2.335723000000  | -3.948273000000 |
| O | -4.158430000000 | -2.252762000000 | -0.803823000000 |

### Int1

( $E_{el}$  = -3023.642382 a.u.;  $G$  = -3022.395192 a.u.)

0 1

|    |                 |                 |                 |
|----|-----------------|-----------------|-----------------|
| Ca | 2.270493000000  | -1.392753000000 | 0.793880000000  |
| I  | 1.485759000000  | -0.719040000000 | -2.244835000000 |
| I  | -0.808670000000 | -1.879829000000 | 1.484756000000  |

|    |                 |                 |                 |
|----|-----------------|-----------------|-----------------|
| Ca | -1.681255000000 | -1.382489000000 | -1.841527000000 |
| C  | 2.733733000000  | -3.778318000000 | 0.444959000000  |
| C  | 2.537341000000  | -4.852382000000 | 1.339471000000  |
| C  | 3.290882000000  | -4.158237000000 | -0.797929000000 |
| C  | 2.880189000000  | -6.176215000000 | 1.046701000000  |
| H  | 2.080725000000  | -4.666820000000 | 2.310977000000  |
| C  | 3.637355000000  | -5.472978000000 | -1.122167000000 |
| H  | 3.445310000000  | -3.398781000000 | -1.564619000000 |
| C  | 3.439060000000  | -6.492706000000 | -0.191106000000 |
| H  | 2.704332000000  | -6.961795000000 | 1.777184000000  |
| H  | 4.058859000000  | -5.703948000000 | -2.097068000000 |
| H  | 3.707062000000  | -7.516969000000 | -0.429517000000 |
| C  | -2.308541000000 | -1.114872000000 | -4.163030000000 |
| C  | -1.393605000000 | -1.537905000000 | -5.152934000000 |
| C  | -3.530464000000 | -0.622787000000 | -4.669227000000 |
| C  | -1.663907000000 | -1.485189000000 | -6.523633000000 |
| H  | -0.418447000000 | -1.922876000000 | -4.849364000000 |
| C  | -3.827755000000 | -0.559476000000 | -6.033746000000 |
| H  | -4.292379000000 | -0.263901000000 | -3.976781000000 |
| C  | -2.890516000000 | -0.994632000000 | -6.970141000000 |
| H  | -0.921519000000 | -1.822572000000 | -7.242872000000 |
| H  | -4.786409000000 | -0.170789000000 | -6.368802000000 |
| H  | -3.111763000000 | -0.949615000000 | -8.032053000000 |
| C  | -1.881484000000 | -4.449182000000 | -3.091938000000 |
| C  | 0.012411000000  | -4.282393000000 | -1.605223000000 |
| C  | -2.227699000000 | -5.837601000000 | -2.567558000000 |
| H  | -2.758379000000 | -3.872205000000 | -3.385849000000 |
| H  | -1.217532000000 | -4.505550000000 | -3.963121000000 |
| C  | -0.254165000000 | -5.655661000000 | -1.014305000000 |
| H  | 0.431959000000  | -3.607649000000 | -0.864315000000 |
| H  | 0.709838000000  | -4.335512000000 | -2.448990000000 |
| C  | -0.973985000000 | -6.546598000000 | -2.034788000000 |
| H  | -2.965035000000 | -5.739725000000 | -1.763654000000 |
| H  | -2.698493000000 | -6.412150000000 | -3.371812000000 |
| H  | -0.870682000000 | -5.533968000000 | -0.116537000000 |
| H  | 0.697727000000  | -6.087458000000 | -0.698747000000 |
| H  | -1.237963000000 | -7.510087000000 | -1.589595000000 |
| H  | -0.294723000000 | -6.758077000000 | -2.870190000000 |
| C  | 4.907286000000  | 0.547024000000  | -0.194243000000 |
| C  | 5.598122000000  | -1.676591000000 | 0.450411000000  |
| C  | 5.532461000000  | 0.394089000000  | -1.569870000000 |
| H  | 4.009631000000  | 1.159464000000  | -0.234894000000 |
| H  | 5.608695000000  | 1.008097000000  | 0.514535000000  |
| C  | 6.247330000000  | -1.919128000000 | -0.905234000000 |

|    |                 |                 |                 |
|----|-----------------|-----------------|-----------------|
| H  | 5.167098000000  | -2.591020000000 | 0.858639000000  |
| H  | 6.329563000000  | -1.265526000000 | 1.160021000000  |
| C  | 6.702618000000  | -0.594838000000 | -1.530199000000 |
| H  | 4.761351000000  | 0.042011000000  | -2.261224000000 |
| H  | 5.844964000000  | 1.380045000000  | -1.918622000000 |
| H  | 5.519955000000  | -2.412970000000 | -1.554890000000 |
| H  | 7.084985000000  | -2.611484000000 | -0.772383000000 |
| H  | 7.097747000000  | -0.760433000000 | -2.536067000000 |
| H  | 7.521145000000  | -0.170782000000 | -0.933414000000 |
| O  | 4.501274000000  | -0.737304000000 | 0.351825000000  |
| O  | -1.219120000000 | -3.670247000000 | -2.068904000000 |
| C  | -4.062792000000 | -3.114265000000 | -0.209701000000 |
| C  | -4.924579000000 | -1.046866000000 | -1.103119000000 |
| C  | -5.184901000000 | -3.915459000000 | -0.859346000000 |
| H  | -3.127434000000 | -3.672101000000 | -0.170695000000 |
| H  | -4.329490000000 | -2.802772000000 | 0.804996000000  |
| C  | -6.071517000000 | -1.761964000000 | -1.801299000000 |
| H  | -4.576526000000 | -0.181925000000 | -1.667084000000 |
| H  | -5.203887000000 | -0.714510000000 | -0.101751000000 |
| C  | -6.435787000000 | -3.044354000000 | -1.041013000000 |
| H  | -4.843942000000 | -4.277663000000 | -1.835284000000 |
| H  | -5.399532000000 | -4.793074000000 | -0.240584000000 |
| H  | -5.770624000000 | -2.000051000000 | -2.827115000000 |
| H  | -6.927542000000 | -1.082295000000 | -1.855838000000 |
| H  | -7.215553000000 | -3.599461000000 | -1.570135000000 |
| H  | -6.836899000000 | -2.775818000000 | -0.056651000000 |
| O  | -3.776450000000 | -1.927460000000 | -0.981964000000 |
| Ca | 1.047114000000  | 2.302496000000  | -1.610146000000 |
| I  | -2.087297000000 | 1.787908000000  | -1.092729000000 |
| I  | 1.467772000000  | 1.893861000000  | 1.497615000000  |
| Ca | -1.787547000000 | 1.081808000000  | 1.977226000000  |
| C  | 3.305068000000  | 3.036566000000  | -2.111741000000 |
| C  | 4.077935000000  | 3.783689000000  | -1.195700000000 |
| C  | 3.899167000000  | 2.871258000000  | -3.381563000000 |
| C  | 5.329521000000  | 4.323459000000  | -1.507953000000 |
| H  | 3.695810000000  | 3.947342000000  | -0.187038000000 |
| C  | 5.142435000000  | 3.409437000000  | -3.725188000000 |
| H  | 3.381265000000  | 2.285934000000  | -4.143309000000 |
| C  | 5.865873000000  | 4.141048000000  | -2.783019000000 |
| H  | 5.885696000000  | 4.887284000000  | -0.763305000000 |
| H  | 5.552987000000  | 3.252064000000  | -4.719011000000 |
| H  | 6.834363000000  | 4.559408000000  | -3.037529000000 |
| C  | -4.131696000000 | 0.422398000000  | 2.207625000000  |
| C  | -5.141056000000 | 1.267264000000  | 1.694589000000  |

|   |                 |                 |                 |
|---|-----------------|-----------------|-----------------|
| C | -4.606845000000 | -0.815049000000 | 2.694387000000  |
| C | -6.498163000000 | 0.930716000000  | 1.675991000000  |
| H | -4.858747000000 | 2.222257000000  | 1.251649000000  |
| C | -5.956892000000 | -1.180713000000 | 2.688791000000  |
| H | -3.893220000000 | -1.548983000000 | 3.071775000000  |
| C | -6.913491000000 | -0.302214000000 | 2.179533000000  |
| H | -7.229491000000 | 1.619637000000  | 1.261183000000  |
| H | -6.264185000000 | -2.150508000000 | 3.072329000000  |
| H | -7.963287000000 | -0.576865000000 | 2.168584000000  |
| C | -0.359300000000 | 1.865684000000  | 4.967195000000  |
| C | -1.987287000000 | 0.113699000000  | 5.204579000000  |
| C | 0.768740000000  | 0.957863000000  | 5.438456000000  |
| H | -0.020452000000 | 2.586941000000  | 4.224330000000  |
| H | -0.811332000000 | 2.409139000000  | 5.808473000000  |
| C | -0.936856000000 | -0.875258000000 | 5.693312000000  |
| H | -2.778991000000 | -0.358985000000 | 4.626394000000  |
| H | -2.448896000000 | 0.651322000000  | 6.044016000000  |
| C | 0.220718000000  | -0.129693000000 | 6.373480000000  |
| H | 1.223606000000  | 0.503709000000  | 4.553142000000  |
| H | 1.536721000000  | 1.560269000000  | 5.933831000000  |
| H | -0.570138000000 | -1.439048000000 | 4.829438000000  |
| H | -1.405120000000 | -1.588562000000 | 6.378352000000  |
| H | 1.012616000000  | -0.825875000000 | 6.663853000000  |
| H | -0.139529000000 | 0.335229000000  | 7.299903000000  |
| C | 0.973955000000  | 4.895722000000  | -3.746174000000 |
| C | -0.595851000000 | 5.270825000000  | -1.970251000000 |
| C | 1.846313000000  | 6.062226000000  | -3.304124000000 |
| H | 1.576282000000  | 4.094289000000  | -4.170492000000 |
| H | 0.218250000000  | 5.203747000000  | -4.479824000000 |
| C | 0.214472000000  | 6.439181000000  | -1.421005000000 |
| H | -1.123747000000 | 4.720203000000  | -1.193363000000 |
| H | -1.339745000000 | 5.610250000000  | -2.702250000000 |
| C | 1.016297000000  | 7.108465000000  | -2.547124000000 |
| H | 2.642094000000  | 5.668392000000  | -2.666631000000 |
| H | 2.321809000000  | 6.501369000000  | -4.186340000000 |
| H | 0.897103000000  | 6.061919000000  | -0.651012000000 |
| H | -0.461792000000 | 7.153666000000  | -0.940673000000 |
| H | 1.664799000000  | 7.890053000000  | -2.142828000000 |
| H | 0.319139000000  | 7.598605000000  | -3.238734000000 |
| O | 0.273076000000  | 4.315225000000  | -2.613776000000 |
| O | -1.389295000000 | 1.091364000000  | 4.323208000000  |
| C | -2.973408000000 | 3.770606000000  | 3.581063000000  |
| C | -1.487013000000 | 4.521389000000  | 1.840732000000  |
| C | -4.102404000000 | 4.656723000000  | 3.069782000000  |



|   |                 |                 |                |
|---|-----------------|-----------------|----------------|
| H | -3.349091000000 | 2.834216000000  | 3.991521000000 |
| H | -2.382087000000 | 4.286812000000  | 4.350339000000 |
| C | -2.562746000000 | 5.407368000000  | 1.228093000000 |
| H | -0.816361000000 | 4.099468000000  | 1.093480000000 |
| H | -0.879172000000 | 5.078477000000  | 2.566873000000 |
| C | -3.549413000000 | 5.869049000000  | 2.309068000000 |
| H | -4.741382000000 | 4.060199000000  | 2.414244000000 |
| H | -4.715733000000 | 4.970764000000  | 3.920135000000 |
| H | -3.086935000000 | 4.832177000000  | 0.457610000000 |
| H | -2.087338000000 | 6.262780000000  | 0.738443000000 |
| H | -4.364900000000 | 6.445396000000  | 1.864596000000 |
| H | -3.031390000000 | 6.537458000000  | 3.008850000000 |
| C | 3.913112000000  | -0.468550000000 | 3.640643000000 |
| C | 2.397359000000  | -2.305696000000 | 4.023512000000 |
| C | 5.101752000000  | -1.291562000000 | 4.124487000000 |
| H | 4.184217000000  | 0.219098000000  | 2.840511000000 |
| H | 3.479007000000  | 0.112771000000  | 4.463618000000 |
| C | 3.526270000000  | -3.210083000000 | 4.496133000000 |
| H | 1.615766000000  | -2.851676000000 | 3.495848000000 |
| H | 1.937270000000  | -1.781097000000 | 4.868442000000 |
| C | 4.650084000000  | -2.370563000000 | 5.117828000000 |
| H | 5.576537000000  | -1.767237000000 | 3.262709000000 |
| H | 5.838283000000  | -0.618924000000 | 4.575427000000 |
| H | 3.902966000000  | -3.776180000000 | 3.639284000000 |
| H | 3.126410000000  | -3.931901000000 | 5.215241000000 |
| H | 5.493280000000  | -3.005258000000 | 5.402364000000 |
| H | 4.285992000000  | -1.892845000000 | 6.036685000000 |
| O | 2.881607000000  | -1.314528000000 | 3.090265000000 |
| O | -2.076694000000 | 3.391005000000  | 2.511623000000 |

## Int2

( $E_{el}$  = -3281.457485 a.u.;  $G$  = -3280.089275 a.u.)

0 1

|    |                 |                 |                |
|----|-----------------|-----------------|----------------|
| Ca | -2.202187000000 | -1.869226000000 | 0.657846000000 |
| I  | -1.332893000000 | 0.864196000000  | 2.024359000000 |
| I  | 0.907613000000  | -2.565739000000 | 0.417205000000 |
| Ca | 1.859146000000  | 0.324738000000  | 1.946350000000 |
| C  | -2.316943000000 | -3.205706000000 | 2.738381000000 |
| C  | -2.043694000000 | -4.570136000000 | 2.976204000000 |
| C  | -2.682041000000 | -2.487805000000 | 3.901787000000 |
| C  | -2.152921000000 | -5.178101000000 | 4.230188000000 |
| H  | -1.714314000000 | -5.207185000000 | 2.155775000000 |
| C  | -2.788513000000 | -3.063389000000 | 5.171340000000 |
| H  | -2.882646000000 | -1.419475000000 | 3.826126000000 |

|   |                |                |                |
|---|----------------|----------------|----------------|
| C | -2.53265000000 | -4.42371200000 | 5.33989600000  |
| H | -1.93272300000 | -6.23630200000 | 4.34547100000  |
| H | -3.07206300000 | -2.45422500000 | 6.02570500000  |
| H | -2.61883100000 | -4.88538000000 | 6.31826500000  |
| C | 2.41274200000  | 2.41304000000  | 3.10252300000  |
| C | 2.25415600000  | 2.46151200000  | 4.50584800000  |
| C | 3.01100500000  | 3.56576800000  | 2.54522500000  |
| C | 2.67192800000  | 3.53889300000  | 5.29386300000  |
| H | 1.78129400000  | 1.62144200000  | 5.01613900000  |
| C | 3.43887600000  | 4.65649900000  | 3.30860200000  |
| H | 3.14967800000  | 3.62171600000  | 1.46532300000  |
| C | 3.27720500000  | 4.64330500000  | 4.69417200000  |
| H | 2.52844600000  | 3.52004500000  | 6.37137100000  |
| H | 3.90060400000  | 5.51513500000  | 2.82706600000  |
| H | 3.60873000000  | 5.48388900000  | 5.29534900000  |
| C | 2.93975600000  | -1.10177300000 | 4.77411300000  |
| C | 0.67912200000  | -1.80179400000 | 4.27926200000  |
| C | 3.37803000000  | -2.54102900000 | 5.01952500000  |
| H | 3.73126700000  | -0.49569300000 | 4.33308200000  |
| H | 2.61912700000  | -0.62409200000 | 5.70885600000  |
| C | 1.02633800000  | -3.26297700000 | 4.50235600000  |
| H | -0.07008000000 | -1.68826200000 | 3.50018100000  |
| H | 0.29792500000  | -1.33206500000 | 5.19449600000  |
| C | 2.19268200000  | -3.39542300000 | 5.48914200000  |
| H | 3.77878800000  | -2.95180800000 | 4.08751400000  |
| H | 4.19026600000  | -2.54427800000 | 5.75387600000  |
| H | 1.29320600000  | -3.70421600000 | 3.53686200000  |
| H | 0.13325400000  | -3.78069200000 | 4.85670600000  |
| H | 2.49277400000  | -4.44182300000 | 5.59354500000  |
| H | 1.87117700000  | -3.05645000000 | 6.48241100000  |
| C | -4.97208800000 | 0.06553400000  | 0.19174200000  |
| C | -5.36457800000 | -1.61408900000 | 1.88533600000  |
| C | -5.35994400000 | 1.18262000000  | 1.14686300000  |
| H | -4.18855400000 | 0.38792700000  | -0.49206000000 |
| H | -5.83490600000 | -0.26963500000 | -0.40037300000 |
| C | -5.73283900000 | -0.55623200000 | 2.91545500000  |
| H | -4.85857600000 | -2.46584900000 | 2.33699900000  |
| H | -6.26481500000 | -1.96426800000 | 1.36047300000  |
| C | -6.32537400000 | 0.67688300000  | 2.22345500000  |
| H | -4.45055100000 | 1.57334900000  | 1.60911300000  |
| H | -5.79255400000 | 1.99865100000  | 0.56571400000  |
| H | -4.83176500000 | -0.27782800000 | 3.46938500000  |
| H | -6.43437600000 | -0.99522400000 | 3.63219600000  |
| H | -6.53100700000 | 1.46692200000  | 2.95073100000  |

|    |                 |                 |                 |
|----|-----------------|-----------------|-----------------|
| H  | -7.286482000000 | 0.410454000000  | 1.763621000000  |
| O  | -4.443357000000 | -1.091193000000 | 0.897871000000  |
| O  | 1.842413000000  | -1.051239000000 | 3.839211000000  |
| C  | 4.588144000000  | -1.667889000000 | 1.392614000000  |
| C  | 5.066407000000  | 0.695631000000  | 1.265481000000  |
| C  | 5.887746000000  | -1.940479000000 | 2.138469000000  |
| H  | 3.784126000000  | -2.330846000000 | 1.710807000000  |
| H  | 4.716420000000  | -1.779457000000 | 0.313198000000  |
| C  | 6.381503000000  | 0.517582000000  | 2.011499000000  |
| H  | 4.596687000000  | 1.648193000000  | 1.504876000000  |
| H  | 5.208127000000  | 0.621033000000  | 0.183167000000  |
| C  | 6.946775000000  | -0.889996000000 | 1.780550000000  |
| H  | 5.698554000000  | -1.922634000000 | 3.217528000000  |
| H  | 6.230736000000  | -2.947397000000 | 1.881089000000  |
| H  | 6.206767000000  | 0.686893000000  | 3.079999000000  |
| H  | 7.083877000000  | 1.285711000000  | 1.672415000000  |
| H  | 7.855077000000  | -1.043133000000 | 2.370683000000  |
| H  | 7.217914000000  | -1.004433000000 | 0.725548000000  |
| O  | 4.111260000000  | -0.323442000000 | 1.662298000000  |
| Ca | -1.142908000000 | 2.546049000000  | -0.691686000000 |
| I  | 2.002070000000  | 1.728078000000  | -0.980372000000 |
| I  | -1.613971000000 | -0.190747000000 | -2.339859000000 |
| Ca | 1.587705000000  | -1.136679000000 | -2.323388000000 |
| C  | -3.483645000000 | 3.201893000000  | -0.873799000000 |
| C  | -4.385844000000 | 2.759734000000  | -1.866361000000 |
| C  | -3.997777000000 | 4.205593000000  | -0.024626000000 |
| C  | -5.684304000000 | 3.259786000000  | -2.003560000000 |
| H  | -4.066333000000 | 1.987145000000  | -2.566204000000 |
| C  | -5.290249000000 | 4.726181000000  | -0.138720000000 |
| H  | -3.366445000000 | 4.605177000000  | 0.771177000000  |
| C  | -6.143590000000 | 4.250480000000  | -1.134528000000 |
| H  | -6.338367000000 | 2.882124000000  | -2.785797000000 |
| H  | -5.635377000000 | 5.496966000000  | 0.545777000000  |
| H  | -7.149510000000 | 4.646114000000  | -1.232398000000 |
| C  | 3.985515000000  | -1.676340000000 | -2.258772000000 |
| C  | 4.937068000000  | -0.630789000000 | -2.272420000000 |
| C  | 4.547665000000  | -2.962254000000 | -2.098877000000 |
| C  | 6.313947000000  | -0.833859000000 | -2.136860000000 |
| H  | 4.592845000000  | 0.398649000000  | -2.371394000000 |
| C  | 5.918756000000  | -3.196237000000 | -1.952814000000 |
| H  | 3.893844000000  | -3.833427000000 | -2.065410000000 |
| C  | 6.812691000000  | -2.125637000000 | -1.971172000000 |
| H  | 6.996909000000  | 0.012060000000  | -2.150717000000 |
| H  | 6.291562000000  | -4.209060000000 | -1.822775000000 |

|   |                 |                 |                 |
|---|-----------------|-----------------|-----------------|
| H | 7.878697000000  | -2.295300000000 | -1.858425000000 |
| C | 0.029674000000  | -3.056474000000 | -4.682659000000 |
| C | 1.113297000000  | -4.413484000000 | -3.019023000000 |
| C | -1.325176000000 | -3.688602000000 | -4.393602000000 |
| H | -0.062138000000 | -2.006601000000 | -4.956154000000 |
| H | 0.553588000000  | -3.587640000000 | -5.489467000000 |
| C | -0.197655000000 | -5.088835000000 | -2.643381000000 |
| H | 1.765958000000  | -4.299020000000 | -2.155195000000 |
| H | 1.651190000000  | -4.973634000000 | -3.795360000000 |
| C | -1.152285000000 | -5.109944000000 | -3.843852000000 |
| H | -1.837120000000 | -3.063557000000 | -3.658450000000 |
| H | -1.925150000000 | -3.684487000000 | -5.309329000000 |
| H | -0.642849000000 | -4.521387000000 | -1.822188000000 |
| H | 0.008980000000  | -6.099280000000 | -2.277433000000 |
| H | -2.121049000000 | -5.531695000000 | -3.561401000000 |
| H | -0.743293000000 | -5.761246000000 | -4.626780000000 |
| C | -1.329558000000 | 5.524114000000  | -2.197453000000 |
| C | 0.057624000000  | 4.068517000000  | -3.505875000000 |
| C | -2.389736000000 | 5.590205000000  | -3.288954000000 |
| H | -1.773766000000 | 5.571238000000  | -1.205019000000 |
| H | -0.591058000000 | 6.330872000000  | -2.296363000000 |
| C | -0.953287000000 | 4.024126000000  | -4.645666000000 |
| H | 0.618072000000  | 3.142152000000  | -3.397409000000 |
| H | 0.781029000000  | 4.882729000000  | -3.648332000000 |
| C | -1.775167000000 | 5.321698000000  | -4.670274000000 |
| H | -3.156088000000 | 4.845056000000  | -3.062666000000 |
| H | -2.869383000000 | 6.573472000000  | -3.257647000000 |
| H | -1.613870000000 | 3.163657000000  | -4.492082000000 |
| H | -0.428113000000 | 3.873048000000  | -5.594473000000 |
| H | -2.558859000000 | 5.264383000000  | -5.430405000000 |
| H | -1.118052000000 | 6.154867000000  | -4.951980000000 |
| O | -0.612526000000 | 4.265808000000  | -2.249131000000 |
| O | 0.870364000000  | -3.077382000000 | -3.510916000000 |
| C | 2.732475000000  | -0.948098000000 | -5.436893000000 |
| C | 1.182752000000  | 0.866098000000  | -5.110723000000 |
| C | 3.878980000000  | 0.012286000000  | -5.720518000000 |
| H | 3.079453000000  | -1.837140000000 | -4.911003000000 |
| H | 2.219673000000  | -1.246615000000 | -6.361942000000 |
| C | 2.268091000000  | 1.909739000000  | -5.340978000000 |
| H | 0.428352000000  | 1.187174000000  | -4.393048000000 |
| H | 0.671294000000  | 0.614689000000  | -6.050477000000 |
| C | 3.356160000000  | 1.347820000000  | -6.266660000000 |
| H | 4.428784000000  | 0.169471000000  | -4.789414000000 |
| H | 4.568249000000  | -0.460196000000 | -6.427291000000 |

|   |                 |                 |                 |
|---|-----------------|-----------------|-----------------|
| H | 2.699979000000  | 2.180000000000  | -4.371682000000 |
| H | 1.817914000000  | 2.812119000000  | -5.765870000000 |
| H | 4.175592000000  | 2.063567000000  | -6.372187000000 |
| H | 2.934206000000  | 1.196904000000  | -7.268855000000 |
| C | -4.065866000000 | -3.275841000000 | -1.881255000000 |
| C | -3.026607000000 | -4.894233000000 | -0.450193000000 |
| C | -5.444055000000 | -3.559894000000 | -1.298070000000 |
| H | -3.949388000000 | -2.235435000000 | -2.182737000000 |
| H | -3.868416000000 | -3.911802000000 | -2.753510000000 |
| C | -4.342298000000 | -5.235728000000 | 0.232942000000  |
| H | -2.177124000000 | -4.982460000000 | 0.224089000000  |
| H | -2.850388000000 | -5.541759000000 | -1.318184000000 |
| C | -5.516666000000 | -4.982114000000 | -0.723210000000 |
| H | -5.635450000000 | -2.828648000000 | -0.511541000000 |
| H | -6.197783000000 | -3.410314000000 | -2.077595000000 |
| H | -4.428124000000 | -4.620500000000 | 1.133184000000  |
| H | -4.316650000000 | -6.279595000000 | 0.559683000000  |
| H | -6.469570000000 | -5.137374000000 | -0.210372000000 |
| H | -5.477522000000 | -5.708048000000 | -1.545597000000 |
| O | -3.026674000000 | -3.521355000000 | -0.906806000000 |
| O | 1.748678000000  | -0.340485000000 | -4.563685000000 |
| F | -0.585191000000 | 4.291374000000  | 0.769927000000  |
| C | -0.481417000000 | 4.479887000000  | 2.210809000000  |
| H | -1.491769000000 | 4.317533000000  | 2.587399000000  |
| H | 0.191639000000  | 3.698060000000  | 2.559414000000  |
| C | 0.047444000000  | 5.863496000000  | 2.475109000000  |
| H | 1.055122000000  | 5.935951000000  | 2.056692000000  |
| H | -0.584840000000 | 6.601348000000  | 1.968969000000  |
| C | 0.093126000000  | 6.143024000000  | 3.984173000000  |
| H | -0.926749000000 | 6.138055000000  | 4.387151000000  |
| H | 0.637341000000  | 5.335100000000  | 4.480602000000  |
| C | 0.771398000000  | 7.476287000000  | 4.304336000000  |
| H | 1.808355000000  | 7.471082000000  | 3.957101000000  |
| H | 0.781625000000  | 7.665309000000  | 5.381001000000  |
| H | 0.256814000000  | 8.312965000000  | 3.820766000000  |

### TSA

( $E_{el}$  = -3281.431396 a.u.;  $G$  = -3280.063980 a.u.)

0 1

|    |                 |                 |                 |
|----|-----------------|-----------------|-----------------|
| Ca | -1.595700000000 | -1.616421000000 | -1.753100000000 |
| I  | -0.687027000000 | -2.257177000000 | 1.205916000000  |
| I  | 1.371840000000  | -0.416872000000 | -2.242007000000 |
| Ca | 2.265717000000  | -1.032731000000 | 0.951358000000  |
| C  | -0.734673000000 | -3.736846000000 | -2.709795000000 |

|   |                 |                 |                 |
|---|-----------------|-----------------|-----------------|
| C | -0.122606000000 | -3.937053000000 | -3.966326000000 |
| C | -0.826136000000 | -4.912155000000 | -1.928103000000 |
| C | 0.314116000000  | -5.181590000000 | -4.429478000000 |
| H | 0.044055000000  | -3.085432000000 | -4.625686000000 |
| C | -0.389547000000 | -6.169079000000 | -2.357547000000 |
| H | -1.246134000000 | -4.851072000000 | -0.924627000000 |
| C | 0.173733000000  | -6.312398000000 | -3.625219000000 |
| H | 0.771561000000  | -5.269922000000 | -5.411626000000 |
| H | -0.489560000000 | -7.034442000000 | -1.707347000000 |
| H | 0.508490000000  | -7.283804000000 | -3.974785000000 |
| C | 2.942951000000  | -1.852431000000 | 3.272247000000  |
| C | 2.740835000000  | -3.237329000000 | 3.440534000000  |
| C | 4.189644000000  | -1.363550000000 | 3.712843000000  |
| C | 3.704338000000  | -4.080831000000 | 3.998073000000  |
| H | 1.794186000000  | -3.675976000000 | 3.126783000000  |
| C | 5.174994000000  | -2.189033000000 | 4.258863000000  |
| H | 4.405829000000  | -0.299221000000 | 3.636378000000  |
| C | 4.930017000000  | -3.555444000000 | 4.406783000000  |
| H | 3.502161000000  | -5.141463000000 | 4.118538000000  |
| H | 6.125741000000  | -1.771832000000 | 4.578888000000  |
| H | 5.684797000000  | -4.201863000000 | 4.842298000000  |
| C | 4.319916000000  | -3.634850000000 | 0.474695000000  |
| C | 2.266087000000  | -3.907231000000 | -0.768769000000 |
| C | 5.151840000000  | -4.146113000000 | -0.695849000000 |
| H | 4.841732000000  | -2.879373000000 | 1.063395000000  |
| H | 4.046444000000  | -4.451736000000 | 1.150834000000  |
| C | 3.011756000000  | -4.405664000000 | -1.992870000000 |
| H | 1.379053000000  | -3.345174000000 | -1.046532000000 |
| H | 1.957891000000  | -4.733195000000 | -0.116867000000 |
| C | 4.323244000000  | -5.086292000000 | -1.582354000000 |
| H | 5.501955000000  | -3.296652000000 | -1.290017000000 |
| H | 6.039163000000  | -4.650721000000 | -0.299666000000 |
| H | 3.212875000000  | -3.549997000000 | -2.646381000000 |
| H | 2.357516000000  | -5.083671000000 | -2.543563000000 |
| H | 4.897276000000  | -5.385513000000 | -2.463782000000 |
| H | 4.095253000000  | -6.003865000000 | -1.025195000000 |
| C | -4.655063000000 | -1.876775000000 | -0.207007000000 |
| C | -4.100489000000 | -3.877987000000 | -1.435679000000 |
| C | -4.808850000000 | -2.659709000000 | 1.086898000000  |
| H | -4.259579000000 | -0.880665000000 | -0.017033000000 |
| H | -5.615431000000 | -1.779599000000 | -0.732156000000 |
| C | -4.182552000000 | -4.732623000000 | -0.179047000000 |
| H | -3.350154000000 | -4.241664000000 | -2.136162000000 |
| H | -5.077037000000 | -3.850276000000 | -1.939803000000 |

|    |                 |                 |                 |
|----|-----------------|-----------------|-----------------|
| C  | -5.180386000000 | -4.120201000000 | 0.811220000000  |
| H  | -3.866298000000 | -2.607769000000 | 1.636012000000  |
| H  | -5.556215000000 | -2.160291000000 | 1.706119000000  |
| H  | -3.189316000000 | -4.783050000000 | 0.277149000000  |
| H  | -4.466022000000 | -5.751060000000 | -0.463727000000 |
| H  | -5.197831000000 | -4.688894000000 | 1.744748000000  |
| H  | -6.192306000000 | -4.173013000000 | 0.387595000000  |
| O  | -3.719124000000 | -2.517564000000 | -1.119485000000 |
| O  | 3.102376000000  | -3.006628000000 | 0.011226000000  |
| C  | 4.955850000000  | -0.349989000000 | -0.919826000000 |
| C  | 4.883006000000  | 1.084808000000  | 1.010589000000  |
| C  | 6.449402000000  | -0.592106000000 | -0.743940000000 |
| H  | 4.438907000000  | -1.215920000000 | -1.329640000000 |
| H  | 4.764997000000  | 0.510156000000  | -1.567274000000 |
| C  | 6.368543000000  | 0.894747000000  | 1.276671000000  |
| H  | 4.314224000000  | 1.214188000000  | 1.930034000000  |
| H  | 4.693182000000  | 1.948374000000  | 0.368415000000  |
| C  | 7.109648000000  | 0.597063000000  | -0.033253000000 |
| H  | 6.599687000000  | -1.504578000000 | -0.156633000000 |
| H  | 6.896382000000  | -0.760535000000 | -1.729168000000 |
| H  | 6.501417000000  | 0.067768000000  | 1.983321000000  |
| H  | 6.757763000000  | 1.801902000000  | 1.749208000000  |
| H  | 8.166552000000  | 0.391091000000  | 0.158568000000  |
| H  | 7.058323000000  | 1.479758000000  | -0.680010000000 |
| O  | 4.327739000000  | -0.091365000000 | 0.361774000000  |
| Ca | -1.682338000000 | 0.575146000000  | 2.574129000000  |
| I  | 1.231138000000  | 1.943102000000  | 1.693196000000  |
| I  | -2.288288000000 | 1.485793000000  | -0.683760000000 |
| Ca | 0.762576000000  | 2.555600000000  | -1.365930000000 |
| C  | -4.069641000000 | 0.140773000000  | 2.838565000000  |
| C  | -5.124529000000 | 0.702959000000  | 2.087131000000  |
| C  | -4.488361000000 | -0.639058000000 | 3.939472000000  |
| C  | -6.475521000000 | 0.505170000000  | 2.387914000000  |
| H  | -4.888210000000 | 1.322465000000  | 1.221542000000  |
| C  | -5.831491000000 | -0.853729000000 | 4.264506000000  |
| H  | -3.736716000000 | -1.107140000000 | 4.576500000000  |
| C  | -6.835648000000 | -0.280756000000 | 3.483591000000  |
| H  | -7.247913000000 | 0.961579000000  | 1.773096000000  |
| H  | -6.097914000000 | -1.466180000000 | 5.122331000000  |
| H  | -7.881348000000 | -0.441041000000 | 3.726857000000  |
| C  | 3.111752000000  | 3.272375000000  | -1.602603000000 |
| C  | 3.638225000000  | 4.137245000000  | -0.615428000000 |
| C  | 4.062015000000  | 2.844020000000  | -2.554419000000 |
| C  | 4.974547000000  | 4.546606000000  | -0.573354000000 |

|   |                 |                |                 |
|---|-----------------|----------------|-----------------|
| H | 2.985937000000  | 4.488660000000 | 0.184396000000  |
| C | 5.405489000000  | 3.234124000000 | -2.539036000000 |
| H | 3.758146000000  | 2.150944000000 | -3.339793000000 |
| C | 5.869391000000  | 4.093097000000 | -1.542871000000 |
| H | 5.321162000000  | 5.209136000000 | 0.215765000000  |
| H | 6.091925000000  | 2.865996000000 | -3.297648000000 |
| H | 6.909575000000  | 4.402031000000 | -1.521523000000 |
| C | -1.186320000000 | 3.556058000000 | -3.956134000000 |
| C | 0.933753000000  | 2.714464000000 | -4.731199000000 |
| C | -1.950773000000 | 2.570808000000 | -4.829168000000 |
| H | -1.702676000000 | 3.747666000000 | -3.016375000000 |
| H | -1.027202000000 | 4.511632000000 | -4.475496000000 |
| C | 0.256554000000  | 1.705126000000 | -5.648985000000 |
| H | 1.865208000000  | 2.332611000000 | -4.317970000000 |
| H | 1.147751000000  | 3.653974000000 | -5.258354000000 |
| C | -1.126942000000 | 2.214472000000 | -6.073852000000 |
| H | -2.137052000000 | 1.673196000000 | -4.233555000000 |
| H | -2.919149000000 | 3.003506000000 | -5.099911000000 |
| H | 0.160690000000  | 0.759750000000 | -5.106075000000 |
| H | 0.898295000000  | 1.524101000000 | -6.516726000000 |
| H | -1.643903000000 | 1.467051000000 | -6.681519000000 |
| H | -1.012068000000 | 3.105325000000 | -6.704675000000 |
| C | -2.500512000000 | 2.765775000000 | 4.916952000000  |
| C | -2.038127000000 | 3.933790000000 | 2.867571000000  |
| C | -3.983615000000 | 3.110946000000 | 4.844731000000  |
| H | -2.320469000000 | 1.784568000000 | 5.356750000000  |
| H | -1.939570000000 | 3.514567000000 | 5.493108000000  |
| C | -3.504119000000 | 4.302467000000 | 2.674732000000  |
| H | -1.520545000000 | 3.763081000000 | 1.924136000000  |
| H | -1.497656000000 | 4.718376000000 | 3.415144000000  |
| C | -4.205699000000 | 4.399386000000 | 4.038176000000  |
| H | -4.509214000000 | 2.279527000000 | 4.370121000000  |
| H | -4.373721000000 | 3.215100000000 | 5.862324000000  |
| H | -3.979218000000 | 3.526867000000 | 2.066225000000  |
| H | -3.573695000000 | 5.247983000000 | 2.126207000000  |
| H | -5.275301000000 | 4.580841000000 | 3.903845000000  |
| H | -3.801545000000 | 5.257969000000 | 4.591166000000  |
| O | -1.917929000000 | 2.703015000000 | 3.594419000000  |
| O | 0.098505000000  | 3.017346000000 | -3.593558000000 |
| C | 0.689200000000  | 5.836532000000 | -1.885873000000 |
| C | -1.215434000000 | 5.329112000000 | -0.513945000000 |
| C | 1.161415000000  | 6.917235000000 | -0.921509000000 |
| H | 1.528386000000  | 5.326247000000 | -2.357809000000 |
| H | 0.033858000000  | 6.254451000000 | -2.662805000000 |



|   |                 |                 |                 |
|---|-----------------|-----------------|-----------------|
| C | -0.814395000000 | 6.358823000000  | 0.533728000000  |
| H | -1.724968000000 | 4.466506000000  | -0.088260000000 |
| H | -1.879666000000 | 5.776391000000  | -1.267273000000 |
| C | -0.013700000000 | 7.493843000000  | -0.119688000000 |
| H | 1.898967000000  | 6.476027000000  | -0.245865000000 |
| H | 1.673620000000  | 7.699297000000  | -1.490436000000 |
| H | -0.206493000000 | 5.861037000000  | 1.296191000000  |
| H | -1.713580000000 | 6.740698000000  | 1.027263000000  |
| H | 0.346818000000  | 8.195782000000  | 0.636846000000  |
| H | -0.672852000000 | 8.059794000000  | -0.790402000000 |
| C | -4.077420000000 | -0.322469000000 | -3.723692000000 |
| C | -2.270890000000 | -1.248409000000 | -5.004874000000 |
| C | -5.011013000000 | -1.459592000000 | -4.118156000000 |
| H | -4.275856000000 | 0.050557000000  | -2.719547000000 |
| H | -4.160996000000 | 0.518552000000  | -4.424086000000 |
| C | -3.098661000000 | -2.453460000000 | -5.425844000000 |
| H | -1.215098000000 | -1.490768000000 | -4.895919000000 |
| H | -2.367972000000 | -0.428846000000 | -5.727481000000 |
| C | -4.588277000000 | -2.082827000000 | -5.456434000000 |
| H | -4.978504000000 | -2.213412000000 | -3.330502000000 |
| H | -6.035604000000 | -1.077374000000 | -4.166360000000 |
| H | -2.909632000000 | -3.261882000000 | -4.713181000000 |
| H | -2.756550000000 | -2.800751000000 | -6.405459000000 |
| H | -5.198612000000 | -2.962852000000 | -5.675781000000 |
| H | -4.766972000000 | -1.363011000000 | -6.265719000000 |
| O | -2.699208000000 | -0.759114000000 | -3.714235000000 |
| O | -0.052596000000 | 4.808167000000  | -1.185943000000 |
| F | -0.747080000000 | -0.053827000000 | 4.461131000000  |
| C | 0.965264000000  | -0.825449000000 | 4.282596000000  |
| H | 0.542163000000  | -1.528518000000 | 3.593971000000  |
| H | 1.367924000000  | 0.094102000000  | 3.900472000000  |
| C | 1.203468000000  | -1.214831000000 | 5.703296000000  |
| H | 2.275460000000  | -1.376229000000 | 5.848938000000  |
| H | 0.930620000000  | -0.352040000000 | 6.320506000000  |
| C | 0.410479000000  | -2.451940000000 | 6.129183000000  |
| H | -0.650533000000 | -2.259493000000 | 5.947026000000  |
| H | 0.698917000000  | -3.291819000000 | 5.488335000000  |
| C | 0.642497000000  | -2.818364000000 | 7.595881000000  |
| H | 1.698613000000  | -3.037189000000 | 7.783785000000  |
| H | 0.062717000000  | -3.699828000000 | 7.882278000000  |
| H | 0.349640000000  | -1.997717000000 | 8.258683000000  |

**ProdA**

( $E_{el}$  = -3281.554988 a.u.;  $G$  = -3280.180200 a.u.)

0 1

|    |                 |                 |                 |
|----|-----------------|-----------------|-----------------|
| Ca | 3.011619000000  | -0.356412000000 | -0.320620000000 |
| I  | 0.840406000000  | 0.689482000000  | -2.425172000000 |
| I  | 0.847092000000  | -2.680619000000 | 0.463376000000  |
| Ca | -1.244402000000 | -1.487173000000 | -1.616633000000 |
| C  | 4.013535000000  | -2.031684000000 | -1.856126000000 |
| C  | 4.533977000000  | -3.316961000000 | -1.590498000000 |
| C  | 4.088294000000  | -1.659319000000 | -3.219145000000 |
| C  | 5.112754000000  | -4.138592000000 | -2.562164000000 |
| H  | 4.481932000000  | -3.721939000000 | -0.580049000000 |
| C  | 4.646978000000  | -2.463372000000 | -4.217494000000 |
| H  | 3.679660000000  | -0.698004000000 | -3.529292000000 |
| C  | 5.177481000000  | -3.710402000000 | -3.888048000000 |
| H  | 5.504022000000  | -5.115526000000 | -2.289749000000 |
| H  | 4.673834000000  | -2.116944000000 | -5.247459000000 |
| H  | 5.624805000000  | -4.339910000000 | -4.650590000000 |
| C  | -4.334547000000 | 0.811642000000  | -3.019337000000 |
| C  | -2.980537000000 | 0.730043000000  | -3.384036000000 |
| C  | -5.207358000000 | -0.180324000000 | -3.479021000000 |
| C  | -2.523663000000 | -0.323354000000 | -4.182272000000 |
| H  | -2.308442000000 | 1.514693000000  | -3.047848000000 |
| C  | -4.753986000000 | -1.234763000000 | -4.272731000000 |
| H  | -6.257356000000 | -0.127621000000 | -3.207257000000 |
| C  | -3.409174000000 | -1.312650000000 | -4.626052000000 |
| H  | -1.483107000000 | -0.344604000000 | -4.492448000000 |
| H  | -5.451013000000 | -1.991637000000 | -4.615567000000 |
| H  | -3.054451000000 | -2.118343000000 | -5.257421000000 |
| C  | -1.249748000000 | -4.027914000000 | -3.855406000000 |
| C  | 0.966521000000  | -3.127883000000 | -3.469922000000 |
| C  | -0.765890000000 | -5.448678000000 | -3.590770000000 |
| H  | -2.274799000000 | -3.873446000000 | -3.519604000000 |
| H  | -1.188363000000 | -3.790557000000 | -4.925774000000 |
| C  | 1.527398000000  | -4.509081000000 | -3.189551000000 |
| H  | 1.459862000000  | -2.371014000000 | -2.865973000000 |
| H  | 1.073412000000  | -2.849913000000 | -4.525089000000 |
| C  | 0.723997000000  | -5.584402000000 | -3.929273000000 |
| H  | -0.926214000000 | -5.686758000000 | -2.534726000000 |
| H  | -1.376522000000 | -6.142933000000 | -4.177399000000 |
| H  | 1.494383000000  | -4.683075000000 | -2.109714000000 |
| H  | 2.578918000000  | -4.514977000000 | -3.480891000000 |
| H  | 1.085390000000  | -6.582857000000 | -3.669339000000 |
| H  | 0.863681000000  | -5.467520000000 | -5.011603000000 |
| C  | 4.099891000000  | 2.815309000000  | -0.820881000000 |
| C  | 5.531531000000  | 1.232075000000  | -1.959076000000 |

|    |                |                |                |
|----|----------------|----------------|----------------|
| C  | 3.83476000000  | 3.57142800000  | -2.11119200000 |
| H  | 3.22586100000  | 2.82785700000  | -0.17298800000 |
| H  | 4.94774600000  | 3.24623200000  | -0.27166300000 |
| C  | 5.29382300000  | 1.91143300000  | -3.30039800000 |
| H  | 5.65948500000  | 0.15523200000  | -2.06116400000 |
| H  | 6.42074200000  | 1.65544100000  | -1.47078600000 |
| C  | 4.99489700000  | 3.40172900000  | -3.09741800000 |
| H  | 2.90769600000  | 3.19435700000  | -2.55053900000 |
| H  | 3.66114300000  | 4.61996600000  | -1.86460800000 |
| H  | 4.44787200000  | 1.42559200000  | -3.79549400000 |
| H  | 6.17483800000  | 1.75691600000  | -3.93191900000 |
| H  | 4.75659200000  | 3.88076400000  | -4.05075600000 |
| H  | 5.88985400000  | 3.90277100000  | -2.70492900000 |
| O  | 4.40333300000  | 1.41110900000  | -1.07031600000 |
| O  | -0.45496400000 | -3.06084500000 | -3.13578000000 |
| C  | -2.62471700000 | -4.28539200000 | -0.41814700000 |
| C  | -4.29558200000 | -2.62892500000 | -0.94464000000 |
| C  | -3.51547100000 | -5.41586100000 | -0.91273100000 |
| H  | -1.56771500000 | -4.48472000000 | -0.59103800000 |
| H  | -2.76666700000 | -4.09831300000 | 0.64836400000  |
| C  | -5.25093900000 | -3.68682600000 | -1.47485500000 |
| H  | -4.39884400000 | -1.68418600000 | -1.47519600000 |
| H  | -4.44385700000 | -2.45050500000 | 0.12411300000  |
| C  | -4.99605600000 | -5.03391500000 | -0.78552200000 |
| H  | -3.27587400000 | -5.63933100000 | -1.95842600000 |
| H  | -3.29146000000 | -6.31176500000 | -0.32610300000 |
| H  | -5.11144100000 | -3.77870200000 | -2.55795300000 |
| H  | -6.27781400000 | -3.34633700000 | -1.30808100000 |
| H  | -5.63199800000 | -5.81351700000 | -1.21426200000 |
| H  | -5.24937800000 | -4.95053500000 | 0.27637500000  |
| O  | -2.91677500000 | -3.05071000000 | -1.13794500000 |
| Ca | -0.57946200000 | 2.93743700000  | -0.38350000000 |
| I  | -2.58377300000 | 0.34213200000  | 0.48255900000  |
| I  | 1.35141900000  | 1.41833900000  | 1.93187800000  |
| Ca | -0.74339600000 | -0.97065400000 | 2.67910700000  |
| C  | 1.08100900000  | 4.76183600000  | -0.41819800000 |
| C  | 2.03046300000  | 5.14231800000  | 0.55483400000  |
| C  | 1.02753600000  | 5.61658100000  | -1.54365100000 |
| C  | 2.86406000000  | 6.25788700000  | 0.42610100000  |
| H  | 2.13723000000  | 4.53815400000  | 1.45715500000  |
| C  | 1.84823200000  | 6.73838700000  | -1.69959500000 |
| H  | 0.31373300000  | 5.40033200000  | -2.33909300000 |
| C  | 2.77757800000  | 7.06287800000  | -0.71074200000 |
| H  | 3.57956800000  | 6.50282000000  | 1.20810700000  |

|   |                 |                 |                 |
|---|-----------------|-----------------|-----------------|
| H | 1.766595000000  | 7.358892000000  | -2.588724000000 |
| H | 3.419940000000  | 7.931079000000  | -0.821541000000 |
| C | -2.351632000000 | -2.813369000000 | 3.014218000000  |
| C | -3.733812000000 | -2.564448000000 | 2.848333000000  |
| C | -2.036600000000 | -4.174868000000 | 3.221501000000  |
| C | -4.712348000000 | -3.563401000000 | 2.881382000000  |
| H | -4.069961000000 | -1.545419000000 | 2.657976000000  |
| C | -2.990892000000 | -5.197090000000 | 3.252913000000  |
| H | -0.995374000000 | -4.472369000000 | 3.344707000000  |
| C | -4.341645000000 | -4.893139000000 | 3.081575000000  |
| H | -5.760925000000 | -3.308579000000 | 2.746589000000  |
| H | -2.684755000000 | -6.228405000000 | 3.409332000000  |
| H | -5.091242000000 | -5.677696000000 | 3.106488000000  |
| C | 1.344659000000  | -0.651090000000 | 5.352666000000  |
| C | 1.402651000000  | -2.873299000000 | 4.421662000000  |
| C | 2.841859000000  | -0.468163000000 | 5.137598000000  |
| H | 0.799856000000  | 0.282144000000  | 5.212156000000  |
| H | 1.130148000000  | -1.041711000000 | 6.356887000000  |
| C | 2.892735000000  | -2.765654000000 | 4.130409000000  |
| H | 0.885661000000  | -3.466584000000 | 3.668850000000  |
| H | 1.213798000000  | -3.319286000000 | 5.407004000000  |
| C | 3.563221000000  | -1.821864000000 | 5.136777000000  |
| H | 2.985693000000  | 0.030290000000  | 4.176690000000  |
| H | 3.234831000000  | 0.192684000000  | 5.916835000000  |
| H | 3.014138000000  | -2.373871000000 | 3.116706000000  |
| H | 3.338819000000  | -3.764584000000 | 4.158564000000  |
| H | 4.622019000000  | -1.689798000000 | 4.896379000000  |
| H | 3.521600000000  | -2.265991000000 | 6.139484000000  |
| C | -3.363418000000 | 4.168063000000  | 0.986049000000  |
| C | -1.420549000000 | 5.108014000000  | 2.044559000000  |
| C | -3.552849000000 | 5.394510000000  | 0.105120000000  |
| H | -3.670498000000 | 3.253599000000  | 0.483082000000  |
| H | -3.927034000000 | 4.258965000000  | 1.924900000000  |
| C | -1.549940000000 | 6.401112000000  | 1.247548000000  |
| H | -0.374330000000 | 4.860438000000  | 2.225881000000  |
| H | -1.947364000000 | 5.176348000000  | 3.007825000000  |
| C | -3.001765000000 | 6.640881000000  | 0.811287000000  |
| H | -3.027821000000 | 5.206281000000  | -0.835696000000 |
| H | -4.617890000000 | 5.506727000000  | -0.124780000000 |
| H | -0.899720000000 | 6.322440000000  | 0.372797000000  |
| H | -1.174778000000 | 7.229657000000  | 1.856972000000  |
| H | -3.058006000000 | 7.511886000000  | 0.152756000000  |
| H | -3.621171000000 | 6.865504000000  | 1.690644000000  |
| O | -1.967201000000 | 3.981588000000  | 1.319728000000  |

|   |                |                |                |
|---|----------------|----------------|----------------|
| O | 0.78620000000  | -1.56802000000 | 4.38764200000  |
| C | -2.15547300000 | -0.05551400000 | 5.52418200000  |
| C | -1.95045200000 | 1.89722700000  | 4.11065200000  |
| C | -3.67024400000 | 0.08410700000  | 5.58757000000  |
| H | -1.84998300000 | -1.10273700000 | 5.52950400000  |
| H | -1.67260600000 | 0.46412000000  | 6.36362300000  |
| C | -3.45661600000 | 2.11424200000  | 4.11661400000  |
| H | -1.50816100000 | 2.18680900000  | 3.15917300000  |
| H | -1.46105000000 | 2.46558600000  | 4.91297400000  |
| C | -4.08664700000 | 1.54850200000  | 5.39603600000  |
| H | -4.10566400000 | -0.54231100000 | 4.80444700000  |
| H | -4.02159300000 | -0.30544900000 | 6.54825600000  |
| H | -3.87858500000 | 1.62210700000  | 3.23503100000  |
| H | -3.65642500000 | 3.18515900000  | 4.01849200000  |
| H | -5.17586300000 | 1.63405600000  | 5.35736700000  |
| H | -3.75173500000 | 2.13951500000  | 6.25846800000  |
| C | 5.12772100000  | 0.41212800000  | 2.26995900000  |
| C | 5.31346400000  | -1.87442000000 | 1.57994900000  |
| C | 6.46503600000  | 0.77336500000  | 1.63657500000  |
| H | 4.41649900000  | 1.23640100000  | 2.23627800000  |
| H | 5.25497700000  | 0.10892100000  | 3.31697000000  |
| C | 6.64006300000  | -1.62683400000 | 0.87726500000  |
| H | 4.72461300000  | -2.64438800000 | 1.08609000000  |
| H | 5.46561200000  | -2.16909900000 | 2.62640400000  |
| C | 7.38015900000  | -0.45633900000 | 1.54076000000  |
| H | 6.26956900000  | 1.17331700000  | 0.64040600000  |
| H | 6.93352100000  | 1.56924600000  | 2.22402600000  |
| H | 6.43103600000  | -1.41331800000 | -0.17522700000 |
| H | 7.23944900000  | -2.54174100000 | 0.90622800000  |
| H | 8.28912500000  | -0.21229800000 | 0.98455800000  |
| H | 7.69593200000  | -0.75283100000 | 2.54933900000  |
| O | 4.49696300000  | -0.68136600000 | 1.56387500000  |
| O | -1.63063600000 | 0.49718500000  | 4.29566400000  |
| F | -1.99739600000 | 3.33717200000  | -1.84476600000 |
| C | -4.83111600000 | 1.96623400000  | -2.18392300000 |
| H | -3.98941600000 | 2.37101800000  | -1.62166100000 |
| H | -5.57935400000 | 1.59959800000  | -1.47257400000 |
| C | -5.43646000000 | 3.11263300000  | -3.02142400000 |
| H | -6.30283000000 | 2.74687700000  | -3.58882300000 |
| H | -5.81934200000 | 3.86794500000  | -2.32356800000 |
| C | -4.42906900000 | 3.77390200000  | -3.96891000000 |
| H | -3.52322600000 | 4.01241200000  | -3.40405300000 |
| H | -4.12720700000 | 3.05140500000  | -4.73581200000 |
| C | -4.99409400000 | 5.02610600000  | -4.64350600000 |

|   |                 |                |                 |
|---|-----------------|----------------|-----------------|
| H | -5.897072000000 | 4.798971000000 | -5.221294000000 |
| H | -4.265686000000 | 5.473298000000 | -5.325776000000 |
| H | -5.260273000000 | 5.785713000000 | -3.900694000000 |

### TSB

( $E_{el} = -3281.406577$  a.u.;  $G = -3280.043307$  a.u.)

0 1

|    |                 |                 |                 |
|----|-----------------|-----------------|-----------------|
| Ca | 1.468844000000  | -1.690414000000 | 1.724848000000  |
| I  | 1.396521000000  | -1.722213000000 | -1.440086000000 |
| I  | -1.746915000000 | -1.211952000000 | 1.629837000000  |
| Ca | -1.715791000000 | -1.205049000000 | -1.654093000000 |
| C  | 0.974017000000  | -4.096948000000 | 2.047328000000  |
| C  | 0.207968000000  | -4.725461000000 | 3.052788000000  |
| C  | 1.527588000000  | -4.996765000000 | 1.106546000000  |
| C  | 0.038410000000  | -6.109831000000 | 3.149455000000  |
| H  | -0.300124000000 | -4.118039000000 | 3.801645000000  |
| C  | 1.368995000000  | -6.384450000000 | 1.169671000000  |
| H  | 2.103756000000  | -4.601730000000 | 0.270166000000  |
| C  | 0.628641000000  | -6.951515000000 | 2.206780000000  |
| H  | -0.558965000000 | -6.532986000000 | 3.953012000000  |
| H  | 1.822340000000  | -7.021979000000 | 0.414976000000  |
| H  | 0.504609000000  | -8.027631000000 | 2.273016000000  |
| C  | -1.279906000000 | -1.123402000000 | -4.226800000000 |
| C  | -1.141697000000 | -2.491067000000 | -4.545348000000 |
| C  | -2.418673000000 | -0.470721000000 | -4.741914000000 |
| C  | -2.090856000000 | -3.170556000000 | -5.309398000000 |
| H  | -0.264765000000 | -3.026214000000 | -4.188868000000 |
| C  | -3.387814000000 | -1.144279000000 | -5.484694000000 |
| H  | -2.531304000000 | 0.595752000000  | -4.561926000000 |
| C  | -3.225406000000 | -2.501535000000 | -5.770554000000 |
| H  | -1.950707000000 | -4.221188000000 | -5.546124000000 |
| H  | -4.260304000000 | -0.614132000000 | -5.854346000000 |
| H  | -3.968624000000 | -3.028236000000 | -6.359485000000 |
| C  | -3.110777000000 | -4.233718000000 | -2.253382000000 |
| C  | -1.340216000000 | -4.353066000000 | -0.611783000000 |
| C  | -3.995730000000 | -5.167381000000 | -1.434536000000 |
| H  | -3.686228000000 | -3.487541000000 | -2.801950000000 |
| H  | -2.515912000000 | -4.799351000000 | -2.979545000000 |
| C  | -2.164309000000 | -5.259697000000 | 0.282465000000  |
| H  | -0.703981000000 | -3.696014000000 | -0.026791000000 |
| H  | -0.704092000000 | -4.925049000000 | -1.297275000000 |
| C  | -3.144924000000 | -6.090573000000 | -0.552485000000 |
| H  | -4.665023000000 | -4.574102000000 | -0.804833000000 |
| H  | -4.625536000000 | -5.740855000000 | -2.122671000000 |

|    |                 |                 |                 |
|----|-----------------|-----------------|-----------------|
| H  | -2.705998000000 | -4.635846000000 | 1.001468000000  |
| H  | -1.482578000000 | -5.890878000000 | 0.854466000000  |
| H  | -3.784744000000 | -6.699704000000 | 0.091885000000  |
| H  | -2.581012000000 | -6.784907000000 | -1.188232000000 |
| C  | 4.727557000000  | -1.010381000000 | 1.026033000000  |
| C  | 4.468541000000  | -3.298160000000 | 1.756720000000  |
| C  | 5.371642000000  | -1.452892000000 | -0.277613000000 |
| H  | 4.130050000000  | -0.112346000000 | 0.879784000000  |
| H  | 5.483256000000  | -0.807623000000 | 1.797344000000  |
| C  | 5.059771000000  | -3.830638000000 | 0.459319000000  |
| H  | 3.702553000000  | -3.956776000000 | 2.163344000000  |
| H  | 5.261270000000  | -3.162905000000 | 2.506166000000  |
| C  | 6.051365000000  | -2.817380000000 | -0.124972000000 |
| H  | 4.597189000000  | -1.501200000000 | -1.046409000000 |
| H  | 6.075879000000  | -0.681122000000 | -0.593074000000 |
| H  | 4.246805000000  | -4.008726000000 | -0.250884000000 |
| H  | 5.536776000000  | -4.795344000000 | 0.660582000000  |
| H  | 6.431864000000  | -3.161233000000 | -1.090450000000 |
| H  | 6.917373000000  | -2.728181000000 | 0.544521000000  |
| O  | 3.820648000000  | -2.020075000000 | 1.552683000000  |
| O  | -2.202108000000 | -3.490858000000 | -1.411079000000 |
| C  | -4.841583000000 | -1.612750000000 | -0.557197000000 |
| C  | -4.735993000000 | 0.228327000000  | -2.100635000000 |
| C  | -6.155217000000 | -2.102886000000 | -1.152142000000 |
| H  | -4.220835000000 | -2.427375000000 | -0.189339000000 |
| H  | -5.014066000000 | -0.909069000000 | 0.261657000000  |
| C  | -6.037958000000 | -0.185950000000 | -2.768240000000 |
| H  | -4.043994000000 | 0.683562000000  | -2.804876000000 |
| H  | -4.903876000000 | 0.928328000000  | -1.279006000000 |
| C  | -6.934231000000 | -0.936811000000 | -1.775221000000 |
| H  | -5.945249000000 | -2.859371000000 | -1.916370000000 |
| H  | -6.737811000000 | -2.589778000000 | -0.363176000000 |
| H  | -5.807962000000 | -0.822727000000 | -3.629839000000 |
| H  | -6.537467000000 | 0.712564000000  | -3.143513000000 |
| H  | -7.839715000000 | -1.300559000000 | -2.269253000000 |
| H  | -7.245716000000 | -0.246107000000 | -0.984308000000 |
| O  | -4.045647000000 | -0.937233000000 | -1.565311000000 |
| Ca | 1.909085000000  | 1.452244000000  | -1.836353000000 |
| I  | -1.327659000000 | 1.949130000000  | -1.685224000000 |
| I  | 1.550061000000  | 1.687381000000  | 1.505489000000  |
| Ca | -1.722496000000 | 1.957016000000  | 1.466335000000  |
| C  | 4.327947000000  | 1.522286000000  | -1.511512000000 |
| C  | 5.056322000000  | 2.058994000000  | -0.427719000000 |
| C  | 5.121912000000  | 1.141915000000  | -2.616674000000 |

|   |                 |                 |                 |
|---|-----------------|-----------------|-----------------|
| C | 6.447534000000  | 2.197498000000  | -0.427171000000 |
| H | 4.518638000000  | 2.385389000000  | 0.463099000000  |
| C | 6.514243000000  | 1.269898000000  | -2.644818000000 |
| H | 4.638512000000  | 0.724642000000  | -3.500339000000 |
| C | 7.186136000000  | 1.798961000000  | -1.542540000000 |
| H | 6.957720000000  | 2.617138000000  | 0.436894000000  |
| H | 7.076075000000  | 0.958013000000  | -3.521727000000 |
| H | 8.266605000000  | 1.902994000000  | -1.553816000000 |
| C | -4.168206000000 | 2.085229000000  | 1.175089000000  |
| C | -4.659087000000 | 3.037245000000  | 0.251597000000  |
| C | -5.168816000000 | 1.265385000000  | 1.739500000000  |
| C | -6.010591000000 | 3.173029000000  | -0.079822000000 |
| H | -3.953300000000 | 3.689343000000  | -0.263804000000 |
| C | -6.528283000000 | 1.375361000000  | 1.427992000000  |
| H | -4.885274000000 | 0.481070000000  | 2.442428000000  |
| C | -6.956964000000 | 2.336267000000  | 0.512461000000  |
| H | -6.326162000000 | 3.921068000000  | -0.802656000000 |
| H | -7.252721000000 | 0.711074000000  | 1.892895000000  |
| H | -8.009134000000 | 2.430060000000  | 0.263555000000  |
| C | -0.736136000000 | 2.664074000000  | 4.636343000000  |
| C | -2.695655000000 | 1.265141000000  | 4.631046000000  |
| C | 0.031564000000  | 1.668924000000  | 5.495221000000  |
| H | -0.083854000000 | 3.172789000000  | 3.927852000000  |
| H | -1.245071000000 | 3.417285000000  | 5.254346000000  |
| C | -2.016875000000 | 0.220447000000  | 5.507618000000  |
| H | -3.381941000000 | 0.817456000000  | 3.915209000000  |
| H | -3.252668000000 | 1.993232000000  | 5.236079000000  |
| C | -0.937974000000 | 0.874608000000  | 6.380668000000  |
| H | 0.566188000000  | 0.992558000000  | 4.822673000000  |
| H | 0.773823000000  | 2.205327000000  | 6.094852000000  |
| H | -1.567071000000 | -0.534632000000 | 4.855604000000  |
| H | -2.774390000000 | -0.279949000000 | 6.118666000000  |
| H | -0.403420000000 | 0.120105000000  | 6.963944000000  |
| H | -1.411320000000 | 1.551189000000  | 7.103774000000  |
| C | 2.814698000000  | 4.309429000000  | -3.314064000000 |
| C | 1.492010000000  | 4.778163000000  | -1.365478000000 |
| C | 4.067261000000  | 4.897874000000  | -2.675645000000 |
| H | 3.039926000000  | 3.468432000000  | -3.968018000000 |
| H | 2.262222000000  | 5.064366000000  | -3.890212000000 |
| C | 2.688540000000  | 5.348060000000  | -0.612922000000 |
| H | 0.785521000000  | 4.272105000000  | -0.708217000000 |
| H | 0.948858000000  | 5.565840000000  | -1.906040000000 |
| C | 3.701466000000  | 5.937789000000  | -1.606205000000 |
| H | 4.639714000000  | 4.084522000000  | -2.225106000000 |



|   |                 |                 |                 |
|---|-----------------|-----------------|-----------------|
| H | 4.686314000000  | 5.345584000000  | -3.459746000000 |
| H | 3.152833000000  | 4.539671000000  | -0.039472000000 |
| H | 2.345684000000  | 6.107417000000  | 0.097977000000  |
| H | 4.600025000000  | 6.272062000000  | -1.080745000000 |
| H | 3.261752000000  | 6.823328000000  | -2.084478000000 |
| O | 1.915630000000  | 3.783842000000  | -2.307934000000 |
| O | -1.725672000000 | 1.985099000000  | 3.841321000000  |
| C | -2.651261000000 | 4.941870000000  | 2.575632000000  |
| C | -0.401823000000 | 5.199665000000  | 1.778228000000  |
| C | -3.139481000000 | 6.117918000000  | 1.739937000000  |
| H | -3.414532000000 | 4.169741000000  | 2.666891000000  |
| H | -2.340953000000 | 5.266451000000  | 3.578604000000  |
| C | -0.786787000000 | 6.367169000000  | 0.879131000000  |
| H | 0.409648000000  | 4.598661000000  | 1.371587000000  |
| H | -0.092973000000 | 5.557046000000  | 2.770998000000  |
| C | -1.999119000000 | 7.107094000000  | 1.461905000000  |
| H | -3.539451000000 | 5.728276000000  | 0.799857000000  |
| H | -3.967106000000 | 6.605500000000  | 2.264223000000  |
| H | -1.027782000000 | 5.976769000000  | -0.114902000000 |
| H | 0.071101000000  | 7.037731000000  | 0.769966000000  |
| H | -2.332345000000 | 7.894741000000  | 0.781079000000  |
| H | -1.704803000000 | 7.599136000000  | 2.397777000000  |
| C | 3.031119000000  | -0.409818000000 | 4.490970000000  |
| C | 1.261382000000  | -1.932131000000 | 5.050356000000  |
| C | 4.097516000000  | -1.399372000000 | 4.941500000000  |
| H | 3.361185000000  | 0.207145000000  | 3.656034000000  |
| H | 2.736545000000  | 0.255938000000  | 5.312441000000  |
| C | 2.239035000000  | -3.011736000000 | 5.490671000000  |
| H | 0.356118000000  | -2.348700000000 | 4.611404000000  |
| H | 0.976673000000  | -1.288622000000 | 5.891778000000  |
| C | 3.540404000000  | -2.370138000000 | 5.992941000000  |
| H | 4.436350000000  | -1.954587000000 | 4.065734000000  |
| H | 4.956043000000  | -0.843863000000 | 5.331961000000  |
| H | 2.429664000000  | -3.667704000000 | 4.636171000000  |
| H | 1.773027000000  | -3.623502000000 | 6.269106000000  |
| H | 4.280250000000  | -3.138836000000 | 6.231181000000  |
| H | 3.340418000000  | -1.822939000000 | 6.923310000000  |
| O | 1.846956000000  | -1.096904000000 | 4.027185000000  |
| O | -1.514965000000 | 4.300488000000  | 1.945848000000  |
| F | 1.976447000000  | 1.333442000000  | -4.057694000000 |
| C | 1.041486000000  | 0.286718000000  | -4.754610000000 |
| H | -0.211701000000 | -0.413031000000 | -4.072579000000 |
| H | 0.640542000000  | 0.912538000000  | -5.561849000000 |
| C | 2.000337000000  | -0.740608000000 | -5.295659000000 |

|   |                |                 |                 |
|---|----------------|-----------------|-----------------|
| H | 2.483881000000 | -1.259202000000 | -4.457164000000 |
| H | 1.379420000000 | -1.497919000000 | -5.795769000000 |
| C | 3.077157000000 | -0.233460000000 | -6.268172000000 |
| H | 2.587214000000 | 0.205348000000  | -7.146028000000 |
| H | 3.626999000000 | 0.578730000000  | -5.782918000000 |
| C | 4.052702000000 | -1.329783000000 | -6.704762000000 |
| H | 4.575085000000 | -1.751995000000 | -5.840021000000 |
| H | 4.809698000000 | -0.948163000000 | -7.396605000000 |
| H | 3.526984000000 | -2.150594000000 | -7.204546000000 |

## TSC

( $E_{el}$  = -3281.409037 a.u.;  $G$  = -3280.043231 a.u.)

0 1

|    |                 |                 |                 |
|----|-----------------|-----------------|-----------------|
| Ca | -1.819971000000 | -1.901132000000 | -1.135088000000 |
| I  | -0.800704000000 | -1.772674000000 | 1.857502000000  |
| I  | 1.205232000000  | -1.150704000000 | -1.957710000000 |
| Ca | 2.325345000000  | -1.021015000000 | 1.295317000000  |
| C  | -1.247656000000 | -4.288969000000 | -1.498514000000 |
| C  | -0.850295000000 | -4.951104000000 | -2.680398000000 |
| C  | -1.325942000000 | -5.138881000000 | -0.369835000000 |
| C  | -0.589146000000 | -6.322770000000 | -2.753902000000 |
| H  | -0.723292000000 | -4.382154000000 | -3.601033000000 |
| C  | -1.062579000000 | -6.511446000000 | -0.407952000000 |
| H  | -1.597377000000 | -4.714437000000 | 0.596410000000  |
| C  | -0.700116000000 | -7.115446000000 | -1.611732000000 |
| H  | -0.292415000000 | -6.773171000000 | -3.697691000000 |
| H  | -1.142150000000 | -7.108921000000 | 0.496644000000  |
| H  | -0.500192000000 | -8.181135000000 | -1.657410000000 |
| C  | 3.451045000000  | -0.861171000000 | 3.667786000000  |
| C  | 4.102450000000  | -2.087795000000 | 3.901395000000  |
| C  | 4.247105000000  | 0.291626000000  | 3.821386000000  |
| C  | 5.460022000000  | -2.171020000000 | 4.221759000000  |
| H  | 3.532369000000  | -3.012746000000 | 3.837407000000  |
| C  | 5.602991000000  | 0.233385000000  | 4.139522000000  |
| H  | 3.784519000000  | 1.270842000000  | 3.698726000000  |
| C  | 6.216616000000  | -1.005769000000 | 4.335012000000  |
| H  | 5.925124000000  | -3.137893000000 | 4.392327000000  |
| H  | 6.183426000000  | 1.146025000000  | 4.237450000000  |
| H  | 7.270320000000  | -1.059800000000 | 4.587289000000  |
| C  | 4.118374000000  | -3.929496000000 | 1.132631000000  |
| C  | 1.859462000000  | -4.200370000000 | 0.312214000000  |
| C  | 4.685823000000  | -4.723909000000 | -0.038785000000 |
| H  | 4.793238000000  | -3.140266000000 | 1.461410000000  |
| H  | 3.926390000000  | -4.591614000000 | 1.986790000000  |

|    |                 |                 |                 |
|----|-----------------|-----------------|-----------------|
| C  | 2.344655000000  | -4.963185000000 | -0.905536000000 |
| H  | 0.984188000000  | -3.602810000000 | 0.077346000000  |
| H  | 1.605514000000  | -4.875905000000 | 1.137702000000  |
| C  | 3.646382000000  | -5.706911000000 | -0.590688000000 |
| H  | 4.994623000000  | -4.034582000000 | -0.829416000000 |
| H  | 5.587143000000  | -5.243116000000 | 0.303628000000  |
| H  | 2.497050000000  | -4.250066000000 | -1.722127000000 |
| H  | 1.554355000000  | -5.646112000000 | -1.219184000000 |
| H  | 4.031223000000  | -6.210667000000 | -1.481525000000 |
| H  | 3.447668000000  | -6.487305000000 | 0.154940000000  |
| C  | -4.784479000000 | -1.482854000000 | 0.519703000000  |
| C  | -4.499240000000 | -3.772277000000 | -0.189035000000 |
| C  | -4.963512000000 | -1.905397000000 | 1.968961000000  |
| H  | -4.278660000000 | -0.521749000000 | 0.452074000000  |
| H  | -5.752052000000 | -1.405475000000 | 0.005041000000  |
| C  | -4.619070000000 | -4.282280000000 | 1.239739000000  |
| H  | -3.820212000000 | -4.376301000000 | -0.788505000000 |
| H  | -5.487959000000 | -3.757509000000 | -0.669342000000 |
| C  | -5.499767000000 | -3.337420000000 | 2.066329000000  |
| H  | -3.997264000000 | -1.831208000000 | 2.473963000000  |
| H  | -5.626915000000 | -1.189137000000 | 2.456676000000  |
| H  | -3.618063000000 | -4.340020000000 | 1.677326000000  |
| H  | -5.025513000000 | -5.298630000000 | 1.216889000000  |
| H  | -5.537442000000 | -3.657913000000 | 3.110901000000  |
| H  | -6.529204000000 | -3.373728000000 | 1.685529000000  |
| O  | -3.963567000000 | -2.427599000000 | -0.222962000000 |
| O  | 2.877667000000  | -3.269182000000 | 0.790594000000  |
| C  | 4.800274000000  | -1.111004000000 | -0.975570000000 |
| C  | 5.047505000000  | 0.784610000000  | 0.477451000000  |
| C  | 6.284167000000  | -1.442184000000 | -0.883961000000 |
| H  | 4.180662000000  | -1.997275000000 | -1.092517000000 |
| H  | 4.593588000000  | -0.433187000000 | -1.808592000000 |
| C  | 6.538114000000  | 0.534939000000  | 0.641535000000  |
| H  | 4.605390000000  | 1.207867000000  | 1.375867000000  |
| H  | 4.835638000000  | 1.448590000000  | -0.362113000000 |
| C  | 7.102612000000  | -0.176701000000 | -0.594545000000 |
| H  | 6.440368000000  | -2.175860000000 | -0.085231000000 |
| H  | 6.598568000000  | -1.910164000000 | -1.822806000000 |
| H  | 6.698943000000  | -0.070561000000 | 1.539115000000  |
| H  | 7.034629000000  | 1.497661000000  | 0.798151000000  |
| H  | 8.157296000000  | -0.427391000000 | -0.448574000000 |
| H  | 7.041245000000  | 0.498235000000  | -1.454864000000 |
| O  | 4.345038000000  | -0.471183000000 | 0.242706000000  |
| Ca | -1.658782000000 | 1.377630000000  | 2.494968000000  |

|    |                 |                 |                 |
|----|-----------------|-----------------|-----------------|
| I  | 1.453807000000  | 2.045436000000  | 1.280822000000  |
| I  | -2.206096000000 | 1.439364000000  | -0.907621000000 |
| Ca | 0.865731000000  | 1.991977000000  | -1.860882000000 |
| C  | -4.083034000000 | 1.279041000000  | 2.753562000000  |
| C  | -5.102752000000 | 1.644056000000  | 1.848293000000  |
| C  | -4.545264000000 | 0.915048000000  | 4.038625000000  |
| C  | -6.462147000000 | 1.632711000000  | 2.174191000000  |
| H  | -4.831758000000 | 1.947131000000  | 0.836779000000  |
| C  | -5.898346000000 | 0.894416000000  | 4.391991000000  |
| H  | -3.821252000000 | 0.633106000000  | 4.803685000000  |
| C  | -6.867349000000 | 1.251019000000  | 3.454052000000  |
| H  | -7.206368000000 | 1.921794000000  | 1.435594000000  |
| H  | -6.199166000000 | 0.600803000000  | 5.394581000000  |
| H  | -7.920347000000 | 1.237748000000  | 3.717581000000  |
| C  | 3.238341000000  | 2.483035000000  | -2.321130000000 |
| C  | 3.837364000000  | 3.520349000000  | -1.568913000000 |
| C  | 4.129460000000  | 1.816128000000  | -3.188758000000 |
| C  | 5.187842000000  | 3.868769000000  | -1.664343000000 |
| H  | 3.232996000000  | 4.068996000000  | -0.845789000000 |
| C  | 5.485630000000  | 2.139422000000  | -3.305526000000 |
| H  | 3.766379000000  | 0.986784000000  | -3.796624000000 |
| C  | 6.023073000000  | 3.173278000000  | -2.539170000000 |
| H  | 5.592161000000  | 4.671809000000  | -1.053386000000 |
| H  | 6.124691000000  | 1.584562000000  | -3.988090000000 |
| H  | 7.074146000000  | 3.430868000000  | -2.620555000000 |
| C  | -1.060144000000 | 2.412500000000  | -4.626225000000 |
| C  | 0.930964000000  | 1.161010000000  | -5.141266000000 |
| C  | -1.952188000000 | 1.335093000000  | -5.226416000000 |
| H  | -1.532105000000 | 2.895363000000  | -3.772155000000 |
| H  | -0.803621000000 | 3.179110000000  | -5.371062000000 |
| C  | 0.122707000000  | 0.039773000000  | -5.781405000000 |
| H  | 1.817154000000  | 0.783826000000  | -4.635048000000 |
| H  | 1.244986000000  | 1.904303000000  | -5.886437000000 |
| C  | -1.202653000000 | 0.580964000000  | -6.332632000000 |
| H  | -2.229398000000 | 0.647441000000  | -4.423008000000 |
| H  | -2.869043000000 | 1.796459000000  | -5.607052000000 |
| H  | -0.068947000000 | -0.721681000000 | -5.019445000000 |
| H  | 0.721476000000  | -0.426260000000 | -6.570040000000 |
| H  | -1.814567000000 | -0.231384000000 | -6.734069000000 |
| H  | -1.001192000000 | 1.263232000000  | -7.168432000000 |
| C  | -2.185362000000 | 4.318656000000  | 3.929387000000  |
| C  | -1.599285000000 | 4.650521000000  | 1.624685000000  |
| C  | -3.633761000000 | 4.722011000000  | 3.678486000000  |
| H  | -2.089633000000 | 3.546539000000  | 4.691770000000  |

|   |                 |                 |                 |
|---|-----------------|-----------------|-----------------|
| H | -1.571464000000 | 5.182520000000  | 4.220098000000  |
| C | -3.026508000000 | 5.032669000000  | 1.250606000000  |
| H | -1.081269000000 | 4.125018000000  | 0.822749000000  |
| H | -1.006392000000 | 5.536060000000  | 1.892443000000  |
| C | -3.740131000000 | 5.653135000000  | 2.461418000000  |
| H | -4.218816000000 | 3.815996000000  | 3.505257000000  |
| H | -4.028082000000 | 5.207069000000  | 4.577261000000  |
| H | -3.552392000000 | 4.128512000000  | 0.929210000000  |
| H | -3.010339000000 | 5.727630000000  | 0.404521000000  |
| H | -4.789641000000 | 5.847694000000  | 2.225195000000  |
| H | -3.278411000000 | 6.622225000000  | 2.694113000000  |
| O | -1.595318000000 | 3.744753000000  | 2.737007000000  |
| O | 0.161482000000  | 1.838411000000  | -4.125742000000 |
| C | 1.066931000000  | 4.961975000000  | -3.346340000000 |
| C | -0.867666000000 | 5.076076000000  | -1.935702000000 |
| C | 1.640110000000  | 6.244809000000  | -2.759483000000 |
| H | 1.853383000000  | 4.260328000000  | -3.620979000000 |
| H | 0.440443000000  | 5.170692000000  | -4.224768000000 |
| C | -0.377737000000 | 6.349106000000  | -1.257641000000 |
| H | -1.456730000000 | 4.442059000000  | -1.275910000000 |
| H | -1.485581000000 | 5.315949000000  | -2.812953000000 |
| C | 0.524592000000  | 7.145189000000  | -2.211087000000 |
| H | 2.337089000000  | 5.974432000000  | -1.961604000000 |
| H | 2.219786000000  | 6.759354000000  | -3.532052000000 |
| H | 0.180429000000  | 6.071686000000  | -0.357660000000 |
| H | -1.239272000000 | 6.944118000000  | -0.939300000000 |
| H | 0.948326000000  | 8.015171000000  | -1.702489000000 |
| H | -0.080223000000 | 7.526998000000  | -3.043580000000 |
| C | -4.294044000000 | -0.913133000000 | -3.283260000000 |
| C | -2.653678000000 | -2.311424000000 | -4.342118000000 |
| C | -5.351486000000 | -2.006375000000 | -3.356968000000 |
| H | -4.402139000000 | -0.287553000000 | -2.398132000000 |
| H | -4.334288000000 | -0.264259000000 | -4.167630000000 |
| C | -3.616282000000 | -3.486744000000 | -4.429735000000 |
| H | -1.621541000000 | -2.630532000000 | -4.202522000000 |
| H | -2.706134000000 | -1.689337000000 | -5.244088000000 |
| C | -5.062341000000 | -2.977159000000 | -4.511096000000 |
| H | -5.349608000000 | -2.545461000000 | -2.408745000000 |
| H | -6.335826000000 | -1.540996000000 | -3.469159000000 |
| H | -3.471631000000 | -4.113732000000 | -3.545051000000 |
| H | -3.361702000000 | -4.095998000000 | -5.302358000000 |
| H | -5.765651000000 | -3.813771000000 | -4.490142000000 |
| H | -5.212353000000 | -2.460185000000 | -5.467763000000 |
| O | -2.965000000000 | -1.477445000000 | -3.204414000000 |

|   |                 |                 |                 |
|---|-----------------|-----------------|-----------------|
| O | 0.245864000000  | 4.272256000000  | -2.370801000000 |
| F | -1.028085000000 | 1.429342000000  | 4.598216000000  |
| C | 0.793710000000  | 0.991574000000  | 4.968797000000  |
| H | 1.092672000000  | 1.584364000000  | 4.115836000000  |
| H | 0.855317000000  | 1.503180000000  | 5.923967000000  |
| C | 0.915526000000  | -0.405239000000 | 4.911953000000  |
| H | 0.418948000000  | -0.816314000000 | 4.033853000000  |
| H | 2.069675000000  | -0.602613000000 | 4.341904000000  |
| C | 0.655086000000  | -1.237425000000 | 6.158611000000  |
| H | 1.244542000000  | -0.841937000000 | 6.994092000000  |
| H | -0.398850000000 | -1.136821000000 | 6.443957000000  |
| C | 0.985233000000  | -2.719149000000 | 5.948316000000  |
| H | 0.419644000000  | -3.123481000000 | 5.102795000000  |
| H | 0.735626000000  | -3.311387000000 | 6.832756000000  |
| H | 2.048123000000  | -2.857700000000 | 5.737067000000  |

### THP

( $E_{el}$  = -271.8561745 a.u.;  $G$  = -271.738775 a.u.)

0 1

|   |                 |                 |                 |
|---|-----------------|-----------------|-----------------|
| O | 0.000030000000  | -1.399511000000 | -0.284886000000 |
| C | 1.181614000000  | -0.770768000000 | 0.201495000000  |
| C | -1.181581000000 | -0.770818000000 | 0.201495000000  |
| H | -1.215845000000 | -0.842471000000 | 1.302058000000  |
| H | -2.016676000000 | -1.347556000000 | -0.200564000000 |
| H | 2.016735000000  | -1.347470000000 | -0.200564000000 |
| H | 1.215882000000  | -0.842421000000 | 1.302058000000  |
| C | 1.257970000000  | 0.696879000000  | -0.224395000000 |
| C | -1.258000000000 | 0.696825000000  | -0.224395000000 |
| H | -2.163351000000 | 1.155480000000  | 0.186802000000  |
| C | -0.000032000000 | 1.447634000000  | 0.236592000000  |
| H | -0.000033000000 | 1.512757000000  | 1.332300000000  |
| H | -0.000054000000 | 2.473941000000  | -0.141550000000 |
| H | 2.163300000000  | 1.155574000000  | 0.186801000000  |
| H | 1.333227000000  | 0.739897000000  | -1.316505000000 |
| H | -1.333260000000 | 0.739842000000  | -1.316506000000 |

### nBuF

( $E_{el}$  = -257.7722970 a.u.;  $G$  = -257.677259 a.u.)

0 1

|   |                |                 |                 |
|---|----------------|-----------------|-----------------|
| C | 2.497918000000 | -0.296865000000 | 0.000061000000  |
| H | 2.550465000000 | -0.941009000000 | 0.882991000000  |
| H | 2.550992000000 | -0.940710000000 | -0.883032000000 |
| H | 3.383304000000 | 0.344163000000  | 0.000431000000  |
| C | 1.209392000000 | 0.530265000000  | -0.000214000000 |

|   |                 |                 |                 |
|---|-----------------|-----------------|-----------------|
| H | 1.197453000000  | 1.188182000000  | -0.877527000000 |
| H | 1.197555000000  | 1.189037000000  | 0.876434000000  |
| C | -0.051595000000 | -0.341125000000 | 0.000117000000  |
| H | -0.058099000000 | -0.993679000000 | -0.879668000000 |
| H | -0.057626000000 | -0.993762000000 | 0.879831000000  |
| C | -1.325920000000 | 0.480690000000  | 0.000262000000  |
| H | -1.392394000000 | 1.113768000000  | 0.891679000000  |
| H | -1.392047000000 | 1.114386000000  | -0.890745000000 |
| F | -2.439819000000 | -0.368685000000 | -0.000195000000 |

### Ca-Tetra\_THF

( $E_{el}$  = -2980.868506 a.u.;  $G$  = -2979.712567 a.u.)

0 1

|    |                 |                 |                 |
|----|-----------------|-----------------|-----------------|
| C  | 3.874778000000  | -5.550342000000 | 0.789168000000  |
| C  | 2.744456000000  | -4.733031000000 | 0.681541000000  |
| C  | 2.515626000000  | -3.606037000000 | 1.501154000000  |
| C  | 3.548283000000  | -3.350563000000 | 2.430866000000  |
| C  | 4.693893000000  | -4.143608000000 | 2.557125000000  |
| C  | 4.856789000000  | -5.260537000000 | 1.737534000000  |
| H  | 3.994636000000  | -6.409342000000 | 0.133620000000  |
| H  | 2.015002000000  | -4.987076000000 | -0.087782000000 |
| H  | 3.465651000000  | -2.482773000000 | 3.086354000000  |
| H  | 5.457000000000  | -3.894679000000 | 3.290844000000  |
| H  | 5.736755000000  | -5.889100000000 | 1.829826000000  |
| Ca | 0.448731000000  | -2.275055000000 | 1.548550000000  |
| I  | 2.005409000000  | 0.539507000000  | 1.865777000000  |
| O  | 0.346181000000  | -2.528473000000 | 3.910009000000  |
| C  | 0.518198000000  | -1.519497000000 | 4.921857000000  |
| C  | 0.732982000000  | -3.793583000000 | 4.503673000000  |
| C  | 1.820354000000  | -1.909102000000 | 5.616664000000  |
| H  | -0.342011000000 | -1.544398000000 | 5.603128000000  |
| H  | 0.556767000000  | -0.557062000000 | 4.415834000000  |
| C  | 1.820315000000  | -3.457005000000 | 5.544883000000  |
| H  | -0.153597000000 | -4.239607000000 | 4.966266000000  |
| H  | 1.088136000000  | -4.428548000000 | 3.693938000000  |
| H  | 2.662259000000  | -1.499042000000 | 5.056241000000  |
| H  | 1.873253000000  | -1.530350000000 | 6.638826000000  |
| H  | 1.579169000000  | -3.903804000000 | 6.511266000000  |
| H  | 2.790668000000  | -3.836181000000 | 5.225538000000  |
| O  | -1.080199000000 | -4.049233000000 | 1.611654000000  |
| C  | -2.284854000000 | -4.147758000000 | 2.419254000000  |
| C  | -1.021643000000 | -5.164656000000 | 0.666504000000  |
| C  | -3.203799000000 | -5.072387000000 | 1.635537000000  |
| H  | -2.675309000000 | -3.140478000000 | 2.555612000000  |

|    |                 |                 |                 |
|----|-----------------|-----------------|-----------------|
| H  | -2.010771000000 | -4.567645000000 | 3.393914000000  |
| C  | -2.207596000000 | -6.061961000000 | 1.015011000000  |
| H  | -1.109394000000 | -4.743688000000 | -0.335434000000 |
| H  | -0.049538000000 | -5.644657000000 | 0.782812000000  |
| H  | -3.947736000000 | -5.554542000000 | 2.272357000000  |
| H  | -3.719525000000 | -4.515036000000 | 0.853519000000  |
| H  | -2.611112000000 | -6.556233000000 | 0.131243000000  |
| H  | -1.914005000000 | -6.825217000000 | 1.742402000000  |
| C  | -3.733088000000 | 5.973773000000  | 0.243347000000  |
| C  | -2.625078000000 | 5.126205000000  | 0.342414000000  |
| C  | -2.567340000000 | 4.021310000000  | 1.219464000000  |
| C  | -3.730159000000 | 3.837141000000  | 2.000282000000  |
| C  | -4.851814000000 | 4.668211000000  | 1.924445000000  |
| C  | -4.855635000000 | 5.747575000000  | 1.040002000000  |
| H  | -3.725189000000 | 6.807917000000  | -0.453734000000 |
| H  | -1.775229000000 | 5.332917000000  | -0.309154000000 |
| H  | -3.779684000000 | 2.989870000000  | 2.685206000000  |
| H  | -5.722457000000 | 4.475504000000  | 2.546948000000  |
| H  | -5.720068000000 | 6.400532000000  | 0.971666000000  |
| Ca | -0.622438000000 | 2.543971000000  | 1.410012000000  |
| I  | -2.204955000000 | -0.250027000000 | 1.680059000000  |
| O  | -0.654383000000 | 2.887373000000  | 3.766790000000  |
| C  | -1.007877000000 | 1.952976000000  | 4.803403000000  |
| C  | -0.977798000000 | 4.210549000000  | 4.267377000000  |
| C  | -2.326442000000 | 2.488814000000  | 5.357054000000  |
| H  | -0.212831000000 | 1.941330000000  | 5.560277000000  |
| H  | -1.089035000000 | 0.970631000000  | 4.342334000000  |
| C  | -2.194363000000 | 4.024672000000  | 5.195360000000  |
| H  | -0.104282000000 | 4.592985000000  | 4.805930000000  |
| H  | -1.184161000000 | 4.835292000000  | 3.399915000000  |
| H  | -3.151498000000 | 2.110439000000  | 4.751485000000  |
| H  | -2.493731000000 | 2.181958000000  | 6.390941000000  |
| H  | -2.026833000000 | 4.518780000000  | 6.154210000000  |
| H  | -3.090191000000 | 4.448411000000  | 4.742468000000  |
| O  | 1.043299000000  | 4.200778000000  | 1.465676000000  |
| C  | 1.495459000000  | 4.918981000000  | 0.268874000000  |
| C  | 2.041714000000  | 4.333931000000  | 2.507153000000  |
| C  | 2.903678000000  | 5.430207000000  | 0.587975000000  |
| H  | 0.774201000000  | 5.711434000000  | 0.060583000000  |
| H  | 1.504275000000  | 4.203202000000  | -0.551274000000 |
| C  | 3.343962000000  | 4.525613000000  | 1.748979000000  |
| H  | 1.793719000000  | 5.206301000000  | 3.124247000000  |
| H  | 1.998092000000  | 3.433200000000  | 3.117971000000  |
| H  | 3.560750000000  | 5.349086000000  | -0.276247000000 |



|    |                 |                 |                 |
|----|-----------------|-----------------|-----------------|
| H  | 2.872244000000  | 6.475158000000  | 0.910633000000  |
| H  | 4.130086000000  | 4.967800000000  | 2.363987000000  |
| H  | 3.691765000000  | 3.565585000000  | 1.362832000000  |
| C  | -5.814119000000 | -3.881908000000 | -0.861996000000 |
| C  | -4.987116000000 | -2.753461000000 | -0.865614000000 |
| C  | -3.681014000000 | -2.747237000000 | -1.404470000000 |
| C  | -3.266277000000 | -3.986358000000 | -1.941799000000 |
| C  | -4.072641000000 | -5.128818000000 | -1.955824000000 |
| C  | -5.357068000000 | -5.079705000000 | -1.412401000000 |
| H  | -6.810496000000 | -3.831771000000 | -0.430118000000 |
| H  | -5.380363000000 | -1.838656000000 | -0.419922000000 |
| H  | -2.267570000000 | -4.067630000000 | -2.372259000000 |
| H  | -3.704066000000 | -6.056179000000 | -2.388092000000 |
| H  | -5.990755000000 | -5.960768000000 | -1.416734000000 |
| Ca | -2.422528000000 | -0.651751000000 | -1.521556000000 |
| I  | 0.403528000000  | -2.153279000000 | -1.665382000000 |
| O  | -4.270427000000 | 0.758785000000  | -1.496542000000 |
| C  | -4.383773000000 | 1.944549000000  | -0.650319000000 |
| C  | -5.370241000000 | 0.710177000000  | -2.444010000000 |
| C  | -5.357877000000 | 2.851692000000  | -1.382768000000 |
| H  | -3.392126000000 | 2.370762000000  | -0.524026000000 |
| H  | -4.757165000000 | 1.634398000000  | 0.327888000000  |
| C  | -6.316385000000 | 1.835356000000  | -2.022872000000 |
| H  | -4.954453000000 | 0.871844000000  | -3.442477000000 |
| H  | -5.810182000000 | -0.287644000000 | -2.396857000000 |
| H  | -5.838115000000 | 3.556403000000  | -0.704364000000 |
| H  | -4.831217000000 | 3.425595000000  | -2.150264000000 |
| H  | -7.032824000000 | 1.471555000000  | -1.280574000000 |
| H  | -6.876654000000 | 2.237685000000  | -2.868816000000 |
| O  | -2.759893000000 | -0.595223000000 | -3.912397000000 |
| C  | -3.564503000000 | -1.589996000000 | -4.592380000000 |
| C  | -1.755267000000 | -0.210035000000 | -4.870865000000 |
| C  | -2.552755000000 | -2.447343000000 | -5.368133000000 |
| H  | -4.256218000000 | -1.066216000000 | -5.263296000000 |
| H  | -4.118956000000 | -2.134365000000 | -3.831734000000 |
| C  | -1.301423000000 | -1.533184000000 | -5.498217000000 |
| H  | -2.213622000000 | 0.458050000000  | -5.610735000000 |
| H  | -0.986509000000 | 0.341429000000  | -4.333848000000 |
| H  | -2.316129000000 | -3.348511000000 | -4.802024000000 |
| H  | -2.952096000000 | -2.750660000000 | -6.337316000000 |
| H  | -0.977408000000 | -1.399901000000 | -6.531999000000 |
| H  | -0.469790000000 | -1.950464000000 | -4.928730000000 |
| C  | 5.763106000000  | 3.955646000000  | -1.467295000000 |
| C  | 4.978039000000  | 2.864758000000  | -1.079151000000 |

|    |                 |                 |                 |
|----|-----------------|-----------------|-----------------|
| C  | 3.693030000000  | 2.599653000000  | -1.600903000000 |
| C  | 3.253198000000  | 3.546753000000  | -2.554411000000 |
| C  | 4.014034000000  | 4.646673000000  | -2.962798000000 |
| C  | 5.282721000000  | 4.853827000000  | -2.420018000000 |
| H  | 6.745799000000  | 4.107844000000  | -1.028253000000 |
| H  | 5.399979000000  | 2.195327000000  | -0.328797000000 |
| H  | 2.264430000000  | 3.430817000000  | -2.999072000000 |
| H  | 3.619694000000  | 5.343429000000  | -3.698380000000 |
| H  | 5.883245000000  | 5.703185000000  | -2.729303000000 |
| Ca | 2.423834000000  | 0.507539000000  | -1.315454000000 |
| I  | -0.423627000000 | 2.017434000000  | -1.787345000000 |
| O  | 2.982189000000  | 0.006045000000  | -3.582449000000 |
| C  | 4.194654000000  | 0.519805000000  | -4.191592000000 |
| C  | 2.007090000000  | -0.092942000000 | -4.636135000000 |
| C  | 3.729965000000  | 1.437938000000  | -5.342096000000 |
| H  | 4.778648000000  | -0.332742000000 | -4.555502000000 |
| H  | 4.744764000000  | 1.044059000000  | -3.413101000000 |
| C  | 2.202148000000  | 1.192626000000  | -5.434249000000 |
| H  | 2.211232000000  | -0.990763000000 | -5.233041000000 |
| H  | 1.034615000000  | -0.199668000000 | -4.162552000000 |
| H  | 4.235661000000  | 1.175075000000  | -6.273276000000 |
| H  | 3.947483000000  | 2.480568000000  | -5.113288000000 |
| H  | 1.844873000000  | 1.103453000000  | -6.461700000000 |
| H  | 1.656877000000  | 2.004196000000  | -4.948265000000 |
| O  | 4.128414000000  | -1.023310000000 | -0.882372000000 |
| C  | 5.106766000000  | -0.919860000000 | 0.183027000000  |
| C  | 4.325854000000  | -2.286272000000 | -1.589078000000 |
| C  | 6.318268000000  | -1.655229000000 | -0.367072000000 |
| H  | 4.706217000000  | -1.403802000000 | 1.076299000000  |
| H  | 5.262915000000  | 0.140675000000  | 0.376553000000  |
| C  | 5.663087000000  | -2.849175000000 | -1.083158000000 |
| H  | 4.320794000000  | -2.045873000000 | -2.653065000000 |
| H  | 3.487157000000  | -2.942123000000 | -1.358573000000 |
| H  | 6.856002000000  | -1.015583000000 | -1.073069000000 |
| H  | 7.007413000000  | -1.963939000000 | 0.420852000000  |
| H  | 6.275660000000  | -3.240399000000 | -1.897393000000 |
| H  | 5.477746000000  | -3.655230000000 | -0.372878000000 |

### Intl\_THF

( $E_{el}$  = -2748.298434 a.u.;  $G$  = -2747.253022 a.u.)

0 1

|   |                |                 |                 |
|---|----------------|-----------------|-----------------|
| C | 3.179686000000 | -5.185311000000 | -2.546226000000 |
| C | 3.031041000000 | -3.899129000000 | -2.016721000000 |
| C | 2.221434000000 | -2.903459000000 | -2.605366000000 |

|    |                 |                 |                 |
|----|-----------------|-----------------|-----------------|
| C  | 1.553933000000  | -3.319136000000 | -3.779151000000 |
| C  | 1.678291000000  | -4.599060000000 | -4.329592000000 |
| C  | 2.501341000000  | -5.541177000000 | -3.712710000000 |
| H  | 3.820000000000  | -5.911447000000 | -2.051463000000 |
| H  | 3.566282000000  | -3.673102000000 | -1.093959000000 |
| H  | 0.887175000000  | -2.620061000000 | -4.285763000000 |
| H  | 1.136061000000  | -4.863800000000 | -5.234099000000 |
| H  | 2.611253000000  | -6.536139000000 | -4.132159000000 |
| Ca | 1.971156000000  | -0.618858000000 | -1.759461000000 |
| I  | -1.234176000000 | -0.664148000000 | -2.126680000000 |
| O  | 2.215507000000  | 0.352607000000  | -3.902431000000 |
| C  | 1.220948000000  | 1.119816000000  | -4.610435000000 |
| C  | 3.035017000000  | -0.308769000000 | -4.902395000000 |
| C  | 0.800099000000  | 0.195783000000  | -5.746925000000 |
| H  | 1.676372000000  | 2.050232000000  | -4.972129000000 |
| H  | 0.426563000000  | 1.354456000000  | -3.904708000000 |
| C  | 2.121287000000  | -0.514062000000 | -6.130494000000 |
| H  | 3.887905000000  | 0.339197000000  | -5.127734000000 |
| H  | 3.384525000000  | -1.240427000000 | -4.459735000000 |
| H  | 0.071106000000  | -0.522356000000 | -5.365861000000 |
| H  | 0.348653000000  | 0.735779000000  | -6.580823000000 |
| H  | 2.568233000000  | -0.065824000000 | -7.020016000000 |
| H  | 1.963318000000  | -1.574058000000 | -6.328711000000 |
| O  | 4.224619000000  | -0.067575000000 | -1.482198000000 |
| C  | 4.874602000000  | 1.159651000000  | -1.915485000000 |
| C  | 5.159432000000  | -0.880148000000 | -0.703466000000 |
| C  | 6.101205000000  | 1.287210000000  | -1.024414000000 |
| H  | 4.158368000000  | 1.972067000000  | -1.802540000000 |
| H  | 5.138966000000  | 1.049941000000  | -2.973205000000 |
| C  | 6.509623000000  | -0.179094000000 | -0.825898000000 |
| H  | 4.801874000000  | -0.890669000000 | 0.326372000000  |
| H  | 5.139063000000  | -1.889812000000 | -1.115156000000 |
| H  | 6.884402000000  | 1.894081000000  | -1.482309000000 |
| H  | 5.825430000000  | 1.733878000000  | -0.069092000000 |
| H  | 7.119570000000  | -0.323559000000 | 0.066357000000  |
| H  | 7.062270000000  | -0.550902000000 | -1.694171000000 |
| C  | -3.957586000000 | 6.103662000000  | 1.096258000000  |
| C  | -3.637669000000 | 4.817654000000  | 0.650943000000  |
| C  | -2.317986000000 | 4.388711000000  | 0.389003000000  |
| C  | -1.328179000000 | 5.365253000000  | 0.635313000000  |
| C  | -1.618460000000 | 6.658902000000  | 1.079447000000  |
| C  | -2.941950000000 | 7.035959000000  | 1.307462000000  |
| H  | -4.993047000000 | 6.381265000000  | 1.277708000000  |
| H  | -4.465442000000 | 4.123194000000  | 0.493384000000  |

|    |                 |                 |                 |
|----|-----------------|-----------------|-----------------|
| H  | -0.280800000000 | 5.115693000000  | 0.463053000000  |
| H  | -0.816693000000 | 7.374159000000  | 1.246041000000  |
| H  | -3.177848000000 | 8.038872000000  | 1.649143000000  |
| Ca | -1.905176000000 | 2.248136000000  | -0.676873000000 |
| I  | 1.315064000000  | 2.517812000000  | -0.730691000000 |
| O  | -2.181077000000 | 3.350724000000  | -2.803274000000 |
| C  | -1.105700000000 | 4.009740000000  | -3.507641000000 |
| C  | -3.307705000000 | 4.267599000000  | -2.870325000000 |
| C  | -1.192325000000 | 5.466490000000  | -3.055232000000 |
| H  | -1.273862000000 | 3.898250000000  | -4.586783000000 |
| H  | -0.177251000000 | 3.513332000000  | -3.231811000000 |
| C  | -2.706459000000 | 5.682751000000  | -2.800307000000 |
| H  | -3.831341000000 | 4.085204000000  | -3.815580000000 |
| H  | -3.966348000000 | 4.034254000000  | -2.036566000000 |
| H  | -0.640904000000 | 5.592928000000  | -2.123052000000 |
| H  | -0.781089000000 | 6.150382000000  | -3.799829000000 |
| H  | -3.160166000000 | 6.331547000000  | -3.552147000000 |
| H  | -2.869945000000 | 6.118432000000  | -1.815492000000 |
| O  | -4.129234000000 | 1.571234000000  | -1.050731000000 |
| C  | -4.959028000000 | 0.999838000000  | 0.018856000000  |
| C  | -4.637316000000 | 1.133508000000  | -2.338581000000 |
| C  | -6.031823000000 | 0.165889000000  | -0.681311000000 |
| H  | -5.351392000000 | 1.824908000000  | 0.615242000000  |
| H  | -4.312279000000 | 0.377253000000  | 0.634423000000  |
| C  | -5.378792000000 | -0.157220000000 | -2.033060000000 |
| H  | -5.306595000000 | 1.907805000000  | -2.731593000000 |
| H  | -3.784469000000 | 1.020826000000  | -3.007243000000 |
| H  | -6.275445000000 | -0.727476000000 | -0.108639000000 |
| H  | -6.944349000000 | 0.751393000000  | -0.829103000000 |
| H  | -6.100927000000 | -0.420306000000 | -2.808208000000 |
| H  | -4.667791000000 | -0.977895000000 | -1.917280000000 |
| C  | 5.923870000000  | 3.285208000000  | 2.168819000000  |
| C  | 4.554544000000  | 3.038060000000  | 2.027771000000  |
| C  | 3.970419000000  | 1.767777000000  | 2.230468000000  |
| C  | 4.888475000000  | 0.750087000000  | 2.575784000000  |
| C  | 6.262899000000  | 0.967898000000  | 2.715862000000  |
| C  | 6.786889000000  | 2.245119000000  | 2.515599000000  |
| H  | 6.320298000000  | 4.283510000000  | 2.003962000000  |
| H  | 3.920582000000  | 3.877357000000  | 1.741062000000  |
| H  | 4.520651000000  | -0.263415000000 | 2.740804000000  |
| H  | 6.924384000000  | 0.147242000000  | 2.982395000000  |
| H  | 7.851181000000  | 2.426718000000  | 2.624766000000  |
| Ca | 1.577418000000  | 1.333714000000  | 2.162501000000  |
| I  | 1.825498000000  | -1.661138000000 | 1.302124000000  |

|    |                 |                 |                 |
|----|-----------------|-----------------|-----------------|
| O  | 1.511067000000  | 1.331232000000  | 4.537726000000  |
| C  | 2.690144000000  | 1.643961000000  | 5.330843000000  |
| C  | 0.809913000000  | 0.326265000000  | 5.304832000000  |
| C  | 3.162786000000  | 0.287806000000  | 5.882043000000  |
| H  | 2.383719000000  | 2.329657000000  | 6.127900000000  |
| H  | 3.405890000000  | 2.127704000000  | 4.670400000000  |
| C  | 1.917020000000  | -0.633361000000 | 5.746397000000  |
| H  | 0.321305000000  | 0.814796000000  | 6.155776000000  |
| H  | 0.043897000000  | -0.104942000000 | 4.664403000000  |
| H  | 3.995115000000  | -0.089752000000 | 5.287814000000  |
| H  | 3.498015000000  | 0.380820000000  | 6.916196000000  |
| H  | 1.664060000000  | -1.148436000000 | 6.674563000000  |
| H  | 2.082537000000  | -1.385787000000 | 4.972201000000  |
| C  | -6.011006000000 | -3.562627000000 | 0.154152000000  |
| C  | -4.668809000000 | -3.233954000000 | -0.064300000000 |
| C  | -3.903406000000 | -2.444392000000 | 0.821104000000  |
| C  | -4.615585000000 | -1.997907000000 | 1.958304000000  |
| C  | -5.956092000000 | -2.309798000000 | 2.204371000000  |
| C  | -6.662001000000 | -3.102480000000 | 1.298472000000  |
| H  | -6.549861000000 | -4.174219000000 | -0.564926000000 |
| H  | -4.207599000000 | -3.617571000000 | -0.974966000000 |
| H  | -4.107220000000 | -1.367041000000 | 2.688210000000  |
| H  | -6.452209000000 | -1.933686000000 | 3.095568000000  |
| H  | -7.702660000000 | -3.351984000000 | 1.478466000000  |
| Ca | -1.468635000000 | -2.126747000000 | 0.713533000000  |
| I  | -1.607288000000 | 0.736519000000  | 2.207843000000  |
| O  | -1.271732000000 | -3.460063000000 | 2.685498000000  |
| C  | -2.283453000000 | -4.447810000000 | 3.016077000000  |
| C  | -0.755873000000 | -2.975624000000 | 3.940579000000  |
| C  | -2.910417000000 | -3.976721000000 | 4.345397000000  |
| H  | -1.787744000000 | -5.419539000000 | 3.116252000000  |
| H  | -2.988478000000 | -4.471251000000 | 2.187505000000  |
| C  | -2.003776000000 | -2.804754000000 | 4.801027000000  |
| H  | -0.060888000000 | -3.717681000000 | 4.353220000000  |
| H  | -0.208243000000 | -2.059151000000 | 3.732879000000  |
| H  | -2.917039000000 | -4.787032000000 | 5.076887000000  |
| H  | -3.936357000000 | -3.644677000000 | 4.190305000000  |
| H  | -1.780637000000 | -2.827931000000 | 5.869143000000  |
| H  | -2.472016000000 | -1.846438000000 | 4.566450000000  |
| O  | -0.787354000000 | -4.051058000000 | -0.404219000000 |
| C  | -1.246832000000 | -4.470652000000 | -1.714407000000 |
| C  | 0.203791000000  | -5.009927000000 | 0.069009000000  |
| C  | -1.238800000000 | -5.988094000000 | -1.622434000000 |
| H  | -0.549541000000 | -4.098722000000 | -2.468453000000 |

|   |                 |                 |                 |
|---|-----------------|-----------------|-----------------|
| H | -2.228677000000 | -4.025582000000 | -1.869955000000 |
| C | 0.050950000000  | -6.255467000000 | -0.823343000000 |
| H | -0.018494000000 | -5.185467000000 | 1.122068000000  |
| H | 1.190947000000  | -4.557044000000 | -0.024597000000 |
| H | -2.121022000000 | -6.332214000000 | -1.075418000000 |
| H | -1.229064000000 | -6.461946000000 | -2.605338000000 |
| H | -0.003857000000 | -7.174593000000 | -0.237563000000 |
| H | 0.902148000000  | -6.327117000000 | -1.501178000000 |

### Int2\_THF

( $E_{el}$  = -3006.112998 a.u.;  $G$  = -3004.952644 a.u.)

0 1

|    |                 |                 |                 |
|----|-----------------|-----------------|-----------------|
| C  | 2.763672000000  | -6.053965000000 | 0.710554000000  |
| C  | 1.764861000000  | -5.078383000000 | 0.624928000000  |
| C  | 1.598682000000  | -4.047039000000 | 1.574782000000  |
| C  | 2.544653000000  | -4.072861000000 | 2.624014000000  |
| C  | 3.560514000000  | -5.028568000000 | 2.732220000000  |
| C  | 3.670748000000  | -6.032946000000 | 1.770885000000  |
| H  | 2.839878000000  | -6.827947000000 | -0.049406000000 |
| H  | 1.097075000000  | -5.121302000000 | -0.235767000000 |
| H  | 2.509025000000  | -3.295836000000 | 3.387815000000  |
| H  | 4.265212000000  | -4.991065000000 | 3.559513000000  |
| H  | 4.449935000000  | -6.784875000000 | 1.845065000000  |
| Ca | -0.080318000000 | -2.248827000000 | 1.529942000000  |
| I  | 2.081873000000  | 0.102576000000  | 1.939866000000  |
| O  | -0.421261000000 | -2.536285000000 | 3.854684000000  |
| C  | -0.075845000000 | -1.668708000000 | 4.949247000000  |
| C  | -0.524095000000 | -3.881316000000 | 4.384450000000  |
| C  | 0.918625000000  | -2.480562000000 | 5.777715000000  |
| H  | -0.984532000000 | -1.422833000000 | 5.513054000000  |
| H  | 0.344954000000  | -0.761084000000 | 4.519812000000  |
| C  | 0.463517000000  | -3.947215000000 | 5.566706000000  |
| H  | -1.558708000000 | -4.047779000000 | 4.702404000000  |
| H  | -0.273455000000 | -4.560120000000 | 3.570876000000  |
| H  | 1.925815000000  | -2.332387000000 | 5.385373000000  |
| H  | 0.916497000000  | -2.182928000000 | 6.827640000000  |
| H  | -0.025760000000 | -4.348943000000 | 6.455841000000  |
| H  | 1.311140000000  | -4.588074000000 | 5.325018000000  |
| O  | -2.008831000000 | -3.547309000000 | 1.324647000000  |
| C  | -3.326433000000 | -3.306451000000 | 1.904784000000  |
| C  | -2.056676000000 | -4.718606000000 | 0.464264000000  |
| C  | -4.215452000000 | -4.452330000000 | 1.413748000000  |
| H  | -3.675785000000 | -2.332227000000 | 1.568709000000  |
| H  | -3.195950000000 | -3.296639000000 | 2.990254000000  |

|    |                 |                 |                 |
|----|-----------------|-----------------|-----------------|
| C  | -3.207041000000 | -5.543351000000 | 1.021697000000  |
| H  | -2.251714000000 | -4.387920000000 | -0.558640000000 |
| H  | -1.080398000000 | -5.198892000000 | 0.523069000000  |
| H  | -4.921593000000 | -4.778252000000 | 2.179608000000  |
| H  | -4.780442000000 | -4.130870000000 | 0.539173000000  |
| H  | -3.606331000000 | -6.242754000000 | 0.285267000000  |
| H  | -2.876229000000 | -6.110306000000 | 1.897432000000  |
| C  | -2.494142000000 | 6.348142000000  | -0.329080000000 |
| C  | -1.489762000000 | 5.416621000000  | -0.048225000000 |
| C  | -1.598031000000 | 4.439572000000  | 0.966337000000  |
| C  | -2.808283000000 | 4.485785000000  | 1.693561000000  |
| C  | -3.826925000000 | 5.409339000000  | 1.439574000000  |
| C  | -3.673469000000 | 6.346243000000  | 0.417069000000  |
| H  | -2.362559000000 | 7.072665000000  | -1.128676000000 |
| H  | -0.593762000000 | 5.441544000000  | -0.668760000000 |
| H  | -5.534559000000 | 3.511448000000  | 0.083257000000  |
| H  | -4.741557000000 | 5.395017000000  | 2.027657000000  |
| H  | -4.459153000000 | 7.065005000000  | 0.206637000000  |
| Ca | 0.066225000000  | 2.684870000000  | 1.324755000000  |
| I  | -2.165203000000 | 0.383778000000  | 1.569044000000  |
| O  | 0.000065000000  | 3.057522000000  | 3.672763000000  |
| C  | -0.494021000000 | 2.154944000000  | 4.679383000000  |
| C  | -0.221804000000 | 4.405901000000  | 4.163554000000  |
| C  | -1.784385000000 | 2.812376000000  | 5.157534000000  |
| H  | 0.251641000000  | 2.065774000000  | 5.480143000000  |
| H  | -0.637952000000 | 1.187056000000  | 4.203876000000  |
| C  | -1.465321000000 | 4.325550000000  | 5.074459000000  |
| H  | 0.671890000000  | 4.719978000000  | 4.712488000000  |
| H  | -0.363991000000 | 5.039465000000  | 3.289410000000  |
| H  | -2.591542000000 | 2.549910000000  | 4.471030000000  |
| H  | -2.069188000000 | 2.491477000000  | 6.161035000000  |
| H  | -1.247405000000 | 4.741629000000  | 6.060006000000  |
| H  | -2.297768000000 | 4.883257000000  | 4.646020000000  |
| O  | 2.062434000000  | 3.912390000000  | 1.483612000000  |
| C  | 2.773917000000  | 4.463977000000  | 0.324945000000  |
| C  | 2.980450000000  | 3.806205000000  | 2.600913000000  |
| C  | 4.236615000000  | 4.609818000000  | 0.755615000000  |
| H  | 2.296474000000  | 5.408010000000  | 0.055437000000  |
| H  | 2.664257000000  | 3.750099000000  | -0.489523000000 |
| C  | 4.342126000000  | 3.645815000000  | 1.946849000000  |
| H  | 2.916200000000  | 4.724307000000  | 3.197983000000  |
| H  | 2.661743000000  | 2.958687000000  | 3.205826000000  |
| H  | 4.916688000000  | 4.349254000000  | -0.053523000000 |
| H  | 4.445469000000  | 5.634947000000  | 1.075911000000  |

|    |                 |                 |                 |
|----|-----------------|-----------------|-----------------|
| H  | 5.166043000000  | 3.885380000000  | 2.621752000000  |
| H  | 4.462644000000  | 2.621622000000  | 1.588155000000  |
| C  | -6.350447000000 | -2.271407000000 | -0.765053000000 |
| C  | -5.234804000000 | -1.431746000000 | -0.684069000000 |
| C  | -4.027975000000 | -1.668590000000 | -1.376748000000 |
| C  | -4.021636000000 | -2.858177000000 | -2.138572000000 |
| C  | -5.118133000000 | -3.722099000000 | -2.233919000000 |
| C  | -6.298594000000 | -3.422457000000 | -1.552571000000 |
| H  | -7.258267000000 | -2.030964000000 | -0.217590000000 |
| H  | -5.315039000000 | -0.550444000000 | -0.048921000000 |
| H  | -3.118221000000 | -3.129361000000 | -2.686252000000 |
| H  | -5.056182000000 | -4.624592000000 | -2.837448000000 |
| H  | -7.159027000000 | -4.079899000000 | -1.625088000000 |
| Ca | -2.216362000000 | -0.038254000000 | -1.611910000000 |
| I  | 0.116118000000  | -2.178731000000 | -1.668094000000 |
| O  | -2.531490000000 | -0.178120000000 | -3.954275000000 |
| C  | -3.885777000000 | -0.101072000000 | -4.466195000000 |
| C  | -1.734538000000 | -0.798608000000 | -4.979438000000 |
| C  | -4.066630000000 | -1.345540000000 | -5.355567000000 |
| H  | -3.985908000000 | 0.832566000000  | -5.029172000000 |
| H  | -4.553410000000 | -0.084830000000 | -3.606761000000 |
| C  | -2.630991000000 | -1.901310000000 | -5.543818000000 |
| H  | -1.477900000000 | -0.045511000000 | -5.735293000000 |
| H  | -0.825801000000 | -1.166261000000 | -4.506458000000 |
| H  | -4.701718000000 | -2.078930000000 | -4.859475000000 |
| H  | -4.527767000000 | -1.076820000000 | -6.307679000000 |
| H  | -2.394614000000 | -2.125095000000 | -6.585518000000 |
| H  | -2.499068000000 | -2.813728000000 | -4.960849000000 |
| C  | 6.791831000000  | 2.381308000000  | -1.079041000000 |
| C  | 5.717059000000  | 1.537284000000  | -0.779506000000 |
| C  | 4.448731000000  | 1.640097000000  | -1.390950000000 |
| C  | 4.348678000000  | 2.684471000000  | -2.338747000000 |
| C  | 5.404873000000  | 3.541850000000  | -2.661942000000 |
| C  | 6.640151000000  | 3.389506000000  | -2.030801000000 |
| H  | 7.745797000000  | 2.255131000000  | -0.573378000000 |
| H  | 5.888048000000  | 0.764678000000  | -0.029018000000 |
| H  | 3.398076000000  | 2.847647000000  | -2.847546000000 |
| H  | 5.266606000000  | 4.329972000000  | -3.398065000000 |
| H  | 7.467872000000  | 4.048478000000  | -2.272410000000 |
| Ca | 2.643337000000  | -0.024032000000 | -1.243220000000 |
| I  | 0.292587000000  | 2.103276000000  | -1.835422000000 |
| O  | 3.008086000000  | -0.477166000000 | -3.551499000000 |
| C  | 4.324251000000  | -0.343649000000 | -4.147057000000 |
| C  | 2.050213000000  | -0.206152000000 | -4.593820000000 |



|   |                |                |                |
|---|----------------|----------------|----------------|
| C | 4.18092000000  | 0.71758900000  | -5.25736200000 |
| H | 4.61747900000  | -1.32000300000 | -4.54848400000 |
| H | 5.00462000000  | -0.04860500000 | -3.35022500000 |
| C | 2.65550800000  | 0.97262500000  | -5.35005600000 |
| H | 1.94342900000  | -1.09936000000 | -5.22241800000 |
| H | 1.09926100000  | 0.01340500000  | -4.11262700000 |
| H | 4.58452400000  | 0.34464000000  | -6.20073100000 |
| H | 4.71604300000  | 1.62814500000  | -4.98994700000 |
| H | 2.29496200000  | 1.03445900000  | -6.37831300000 |
| H | 2.39071400000  | 1.89876700000  | -4.83704700000 |
| O | 3.89360600000  | -1.94527100000 | -0.82448700000 |
| C | 4.73790600000  | -2.16448800000 | 0.33412200000  |
| C | 3.90276200000  | -3.15916000000 | -1.62847600000 |
| C | 5.87837800000  | -3.00532300000 | -0.21722900000 |
| H | 4.16201800000  | -2.69528100000 | 1.09589700000  |
| H | 5.02963600000  | -1.18519600000 | 0.71097500000  |
| C | 5.14490900000  | -3.95646400000 | -1.18405500000 |
| H | 3.92817600000  | -2.83916100000 | -2.67020000000 |
| H | 2.97704400000  | -3.70268700000 | -1.43851600000 |
| H | 6.58448500000  | -2.36585200000 | -0.75390600000 |
| H | 6.41553900000  | -3.53891200000 | 0.56850100000  |
| H | 5.76858800000  | -4.24890800000 | -2.03048400000 |
| H | 4.83205100000  | -4.85815800000 | -0.65652500000 |
| C | -6.36098500000 | 1.98926200000  | -1.23544900000 |
| H | -6.70343700000 | 2.69915400000  | -1.99869900000 |
| H | -5.99791300000 | 1.10520700000  | -1.76664700000 |
| C | -7.53191300000 | 1.59260800000  | -0.33436400000 |
| H | -7.94292100000 | 2.46299600000  | 0.18710600000  |
| H | -7.21308700000 | 0.87073100000  | 0.42304800000  |
| H | -8.33828800000 | 1.13188700000  | -0.91059600000 |
| C | -5.20337200000 | 2.61345900000  | -0.45035900000 |
| H | -4.83576900000 | 1.92098500000  | 0.31472400000  |
| H | -2.98605600000 | 3.74765800000  | 2.47569900000  |
| C | -4.04341700000 | 3.03978500000  | -1.30868200000 |
| H | -4.32702800000 | 3.70960700000  | -2.12018300000 |
| H | -3.20856800000 | 3.44714900000  | -0.74461500000 |
| F | -3.51517100000 | 1.85704400000  | -1.98827100000 |

### TSA\_THF

( $E_{el}$  = -3006.084265 a.u.;  $G$  = -3004.919677 a.u.)

0 1

|   |                |               |                |
|---|----------------|---------------|----------------|
| C | -6.35406700000 | 2.41560600000 | -1.48882200000 |
| C | -5.32351000000 | 1.52627200000 | -1.16527400000 |
| C | -4.06126000000 | 1.52925300000 | -1.79865200000 |

|    |                 |                 |                 |
|----|-----------------|-----------------|-----------------|
| C  | -3.910505000000 | 2.538933000000  | -2.775537000000 |
| C  | -4.917517000000 | 3.449067000000  | -3.114416000000 |
| C  | -6.155888000000 | 3.382226000000  | -2.475498000000 |
| H  | -7.308376000000 | 2.360732000000  | -0.971096000000 |
| H  | -5.519958000000 | 0.802301000000  | -0.374326000000 |
| H  | -2.958237000000 | 2.627821000000  | -3.299908000000 |
| H  | -4.740929000000 | 4.206314000000  | -3.874715000000 |
| H  | -6.948790000000 | 4.076476000000  | -2.734494000000 |
| Ca | -2.353584000000 | -0.229543000000 | -1.574809000000 |
| I  | 0.132019000000  | 1.884952000000  | -1.912115000000 |
| O  | -2.467856000000 | -0.569568000000 | -3.926138000000 |
| C  | -1.450496000000 | -0.279536000000 | -4.900813000000 |
| C  | -3.744384000000 | -0.468633000000 | -4.605704000000 |
| C  | -2.030291000000 | 0.878467000000  | -5.709505000000 |
| H  | -1.276426000000 | -1.172385000000 | -5.515071000000 |
| H  | -0.543042000000 | -0.029758000000 | -4.355308000000 |
| C  | -3.554214000000 | 0.596631000000  | -5.704993000000 |
| H  | -3.987396000000 | -1.451033000000 | -5.024052000000 |
| H  | -4.482509000000 | -0.191802000000 | -3.855243000000 |
| H  | -1.813647000000 | 1.817475000000  | -5.197351000000 |
| H  | -1.610111000000 | 0.932018000000  | -6.715420000000 |
| H  | -3.896436000000 | 0.219114000000  | -6.670437000000 |
| H  | -4.119270000000 | 1.497863000000  | -5.469085000000 |
| O  | -3.763898000000 | -2.099973000000 | -1.573626000000 |
| C  | -3.560206000000 | -3.341801000000 | -2.303973000000 |
| C  | -4.898030000000 | -2.241046000000 | -0.659506000000 |
| C  | -4.310624000000 | -4.394739000000 | -1.502578000000 |
| H  | -2.487458000000 | -3.515376000000 | -2.371862000000 |
| H  | -3.972661000000 | -3.216297000000 | -3.311417000000 |
| C  | -5.514587000000 | -3.600776000000 | -0.977694000000 |
| H  | -4.503901000000 | -2.200233000000 | 0.356194000000  |
| H  | -5.567239000000 | -1.398177000000 | -0.833656000000 |
| H  | -4.595324000000 | -5.253875000000 | -2.112699000000 |
| H  | -3.697702000000 | -4.742942000000 | -0.671273000000 |
| H  | -5.957477000000 | -4.058212000000 | -0.093041000000 |
| H  | -6.284682000000 | -3.504712000000 | -1.749612000000 |
| C  | 6.871737000000  | -1.425179000000 | -0.911281000000 |
| C  | 5.579975000000  | -1.245415000000 | -0.405998000000 |
| C  | 4.458985000000  | -1.925655000000 | -0.921682000000 |
| C  | 4.725276000000  | -2.826240000000 | -1.972578000000 |
| C  | 6.006933000000  | -3.038604000000 | -2.480683000000 |
| C  | 7.087766000000  | -2.329322000000 | -1.950954000000 |
| H  | 7.708199000000  | -0.875545000000 | -0.489255000000 |
| H  | 5.449439000000  | -0.550743000000 | 0.423351000000  |

|    |                 |                 |                 |
|----|-----------------|-----------------|-----------------|
| H  | 5.040614000000  | -4.118673000000 | 0.499563000000  |
| H  | 6.170630000000  | -3.755334000000 | -3.280813000000 |
| H  | 8.088502000000  | -2.487375000000 | -2.338922000000 |
| Ca | 2.586600000000  | -0.197283000000 | -1.185716000000 |
| I  | 0.226683000000  | -2.321568000000 | -1.589684000000 |
| O  | 3.152437000000  | -0.170087000000 | -3.495126000000 |
| C  | 2.317936000000  | -0.664063000000 | -4.564545000000 |
| C  | 4.521403000000  | -0.120426000000 | -3.989034000000 |
| C  | 3.178138000000  | -1.729544000000 | -5.229319000000 |
| H  | 2.077007000000  | 0.162878000000  | -5.244415000000 |
| H  | 1.403844000000  | -1.045306000000 | -4.114190000000 |
| C  | 4.591232000000  | -1.112807000000 | -5.168060000000 |
| H  | 4.731971000000  | 0.903422000000  | -4.306488000000 |
| H  | 5.171006000000  | -0.385990000000 | -3.157532000000 |
| H  | 3.132684000000  | -2.645556000000 | -4.637409000000 |
| H  | 2.854828000000  | -1.956655000000 | -6.246525000000 |
| H  | 4.825353000000  | -0.586660000000 | -6.096105000000 |
| H  | 5.358152000000  | -1.868213000000 | -5.001871000000 |
| O  | 3.869767000000  | 1.786857000000  | -1.178534000000 |
| C  | 4.390838000000  | 2.465463000000  | 0.017764000000  |
| C  | 3.849029000000  | 2.735942000000  | -2.277720000000 |
| C  | 4.577186000000  | 3.934983000000  | -0.370971000000 |
| H  | 5.317287000000  | 1.966091000000  | 0.307932000000  |
| H  | 3.646720000000  | 2.349270000000  | 0.801886000000  |
| C  | 3.672125000000  | 4.082804000000  | -1.602529000000 |
| H  | 4.804589000000  | 2.673658000000  | -2.811717000000 |
| H  | 3.037620000000  | 2.446933000000  | -2.943590000000 |
| H  | 4.287424000000  | 4.598688000000  | 0.441756000000  |
| H  | 5.618698000000  | 4.137532000000  | -0.638110000000 |
| H  | 3.955603000000  | 4.917562000000  | -2.246354000000 |
| H  | 2.633446000000  | 4.209008000000  | -1.292410000000 |
| C  | -2.875769000000 | -6.584191000000 | 1.208675000000  |
| C  | -1.857790000000 | -5.625786000000 | 1.157828000000  |
| C  | -2.022148000000 | -4.293007000000 | 1.597887000000  |
| C  | -3.310130000000 | -4.000652000000 | 2.100937000000  |
| C  | -4.344647000000 | -4.939530000000 | 2.166735000000  |
| C  | -4.129595000000 | -6.242415000000 | 1.716110000000  |
| H  | -2.694559000000 | -7.596021000000 | 0.854948000000  |
| H  | -0.892792000000 | -5.937516000000 | 0.758266000000  |
| H  | -3.521226000000 | -2.993332000000 | 2.460493000000  |
| H  | -5.315816000000 | -4.659448000000 | 2.568605000000  |
| H  | -4.925025000000 | -6.979554000000 | 1.761832000000  |
| Ca | -0.146467000000 | -2.719325000000 | 1.689996000000  |
| I  | -2.255554000000 | -0.143447000000 | 1.594254000000  |

|    |                 |                 |                 |
|----|-----------------|-----------------|-----------------|
| O  | -0.232624000000 | -2.708373000000 | 4.068922000000  |
| C  | -0.925049000000 | -3.748058000000 | 4.802310000000  |
| C  | -0.250476000000 | -1.555000000000 | 4.926928000000  |
| C  | -2.089934000000 | -3.026793000000 | 5.502638000000  |
| H  | -0.220444000000 | -4.185212000000 | 5.518749000000  |
| H  | -1.239479000000 | -4.499101000000 | 4.080532000000  |
| C  | -1.672938000000 | -1.528705000000 | 5.494618000000  |
| H  | 0.504679000000  | -1.685430000000 | 5.712202000000  |
| H  | 0.022294000000  | -0.694925000000 | 4.319174000000  |
| H  | -3.013488000000 | -3.176063000000 | 4.943318000000  |
| H  | -2.238478000000 | -3.410391000000 | 6.513523000000  |
| H  | -1.706626000000 | -1.072889000000 | 6.486012000000  |
| H  | -2.323348000000 | -0.957114000000 | 4.830472000000  |
| C  | 2.381128000000  | 6.529399000000  | 1.321419000000  |
| C  | 1.522883000000  | 5.495947000000  | 0.931152000000  |
| C  | 1.492381000000  | 4.226710000000  | 1.548954000000  |
| C  | 2.421495000000  | 4.080356000000  | 2.605229000000  |
| C  | 3.291968000000  | 5.093706000000  | 3.018907000000  |
| C  | 3.271886000000  | 6.332151000000  | 2.376342000000  |
| H  | 2.358207000000  | 7.485659000000  | 0.805025000000  |
| H  | 0.851277000000  | 5.701552000000  | 0.097077000000  |
| H  | 2.479059000000  | 3.127689000000  | 3.132457000000  |
| H  | 3.986732000000  | 4.919613000000  | 3.836879000000  |
| H  | 3.941588000000  | 7.126910000000  | 2.688670000000  |
| Ca | -0.227566000000 | 2.481241000000  | 1.242496000000  |
| I  | 1.904336000000  | 0.158153000000  | 1.943089000000  |
| O  | -1.029995000000 | 3.038615000000  | 3.424184000000  |
| C  | -0.851794000000 | 4.375608000000  | 3.958313000000  |
| C  | -1.047433000000 | 2.153499000000  | 4.559612000000  |
| C  | 0.028179000000  | 4.208518000000  | 5.215264000000  |
| H  | -1.841691000000 | 4.778602000000  | 4.199715000000  |
| H  | -0.386077000000 | 4.972869000000  | 3.177394000000  |
| C  | 0.084440000000  | 2.675197000000  | 5.440043000000  |
| H  | -2.025182000000 | 2.222706000000  | 5.052936000000  |
| H  | -0.917806000000 | 1.142373000000  | 4.183283000000  |
| H  | -0.415990000000 | 4.724360000000  | 6.068745000000  |
| H  | 1.023060000000  | 4.618446000000  | 5.044514000000  |
| H  | -0.036954000000 | 2.391508000000  | 6.486870000000  |
| H  | 1.034536000000  | 2.273052000000  | 5.082019000000  |
| O  | -2.069907000000 | 3.742752000000  | 0.589012000000  |
| C  | -2.097960000000 | 4.709921000000  | -0.491905000000 |
| C  | -3.399682000000 | 3.640295000000  | 1.187257000000  |
| C  | -3.200167000000 | 5.677967000000  | -0.091144000000 |
| H  | -2.332689000000 | 4.188567000000  | -1.421874000000 |

|   |                 |                 |                 |
|---|-----------------|-----------------|-----------------|
| H | -1.104414000000 | 5.152199000000  | -0.555527000000 |
| C | -4.245894000000 | 4.727274000000  | 0.514283000000  |
| H | -3.267094000000 | 3.788260000000  | 2.260496000000  |
| H | -3.780554000000 | 2.637205000000  | 1.000253000000  |
| H | -2.827074000000 | 6.385397000000  | 0.655550000000  |
| H | -3.585682000000 | 6.239653000000  | -0.943704000000 |
| H | -4.910905000000 | 5.223575000000  | 1.223344000000  |
| H | -4.852298000000 | 4.286722000000  | -0.276780000000 |
| C | 4.783801000000  | -3.388059000000 | 2.527570000000  |
| H | 5.158007000000  | -2.382044000000 | 2.309477000000  |
| H | 3.953798000000  | -3.271183000000 | 3.231049000000  |
| C | 5.895925000000  | -4.230388000000 | 3.154053000000  |
| H | 6.742839000000  | -4.334547000000 | 2.468096000000  |
| H | 5.539115000000  | -5.236492000000 | 3.396367000000  |
| H | 6.267847000000  | -3.777373000000 | 4.076997000000  |
| C | 4.241248000000  | -4.001529000000 | 1.235715000000  |
| H | 3.840976000000  | -5.002981000000 | 1.425653000000  |
| H | 3.901575000000  | -3.396644000000 | -2.400985000000 |
| C | 3.126621000000  | -3.205819000000 | 0.636959000000  |
| H | 2.911742000000  | -2.229700000000 | 1.021558000000  |
| H | 2.645978000000  | -3.521881000000 | -0.270058000000 |
| F | 1.705493000000  | -3.874956000000 | 1.653997000000  |

### ProdA\_THF

( $E_{el}$  = -3006.203140 a.u.;  $G$  = -3005.034866 a.u.)

0 1

|    |                |                 |                 |
|----|----------------|-----------------|-----------------|
| C  | 6.068150000000 | 3.715382000000  | -0.277415000000 |
| C  | 4.703932000000 | 3.418904000000  | -0.180357000000 |
| C  | 4.104235000000 | 2.284776000000  | -0.770734000000 |
| C  | 5.014386000000 | 1.443329000000  | -1.450984000000 |
| C  | 6.382218000000 | 1.711217000000  | -1.564263000000 |
| C  | 6.916538000000 | 2.861494000000  | -0.982326000000 |
| H  | 6.470379000000 | 4.608377000000  | 0.193993000000  |
| H  | 4.085504000000 | 4.115137000000  | 0.387176000000  |
| H  | 4.644843000000 | 0.536365000000  | -1.927892000000 |
| H  | 7.031678000000 | 1.027612000000  | -2.105813000000 |
| H  | 7.975437000000 | 3.082852000000  | -1.067516000000 |
| Ca | 1.669295000000 | 2.080079000000  | -1.049765000000 |
| I  | 2.113019000000 | -1.198251000000 | -1.449669000000 |
| O  | 2.110849000000 | 2.679355000000  | -3.335670000000 |
| C  | 2.673657000000 | 1.756303000000  | -4.298985000000 |
| C  | 2.668227000000 | 3.985629000000  | -3.615853000000 |
| C  | 4.032241000000 | 2.344506000000  | -4.736202000000 |
| H  | 1.975818000000 | 1.666757000000  | -5.138786000000 |

|    |                 |                 |                 |
|----|-----------------|-----------------|-----------------|
| H  | 2.760487000000  | 0.789547000000  | -3.803098000000 |
| C  | 4.112970000000  | 3.710390000000  | -4.016075000000 |
| H  | 2.089858000000  | 4.445773000000  | -4.426921000000 |
| H  | 2.561868000000  | 4.580370000000  | -2.710432000000 |
| H  | 4.857655000000  | 1.701047000000  | -4.433156000000 |
| H  | 4.066491000000  | 2.458410000000  | -5.821718000000 |
| H  | 4.517051000000  | 4.498691000000  | -4.653768000000 |
| H  | 4.729027000000  | 3.628471000000  | -3.121431000000 |
| O  | 0.854039000000  | 4.305870000000  | -0.911960000000 |
| C  | -0.194945000000 | 4.902053000000  | -1.734752000000 |
| C  | 1.107457000000  | 5.160955000000  | 0.251992000000  |
| C  | -0.834928000000 | 5.968298000000  | -0.857952000000 |
| H  | -0.876389000000 | 4.107961000000  | -2.033281000000 |
| H  | 0.278078000000  | 5.329125000000  | -2.625737000000 |
| C  | 0.356461000000  | 6.457815000000  | -0.024353000000 |
| H  | 0.715151000000  | 4.647748000000  | 1.129352000000  |
| H  | 2.187955000000  | 5.278625000000  | 0.342429000000  |
| H  | -1.301118000000 | 6.759436000000  | -1.447604000000 |
| H  | -1.590234000000 | 5.524247000000  | -0.209012000000 |
| H  | 0.041836000000  | 6.943531000000  | 0.899124000000  |
| H  | 0.978049000000  | 7.152439000000  | -0.598679000000 |
| C  | -3.796463000000 | -3.298061000000 | -1.229454000000 |
| C  | -4.115854000000 | -1.937720000000 | -1.167011000000 |
| C  | -4.864711000000 | -1.333236000000 | -2.190756000000 |
| C  | -5.290454000000 | -2.129345000000 | -3.260042000000 |
| C  | -4.980540000000 | -3.489131000000 | -3.317895000000 |
| C  | -4.222489000000 | -4.078715000000 | -2.307333000000 |
| H  | -3.248347000000 | -3.750898000000 | -0.409756000000 |
| H  | -3.854191000000 | -1.334834000000 | -0.299367000000 |
| H  | -7.406698000000 | -0.133327000000 | -2.365687000000 |
| H  | -5.328608000000 | -4.086867000000 | -4.153763000000 |
| H  | -3.980189000000 | -5.134670000000 | -2.346593000000 |
| Ca | -0.926075000000 | -1.862986000000 | -1.589886000000 |
| I  | -1.441995000000 | 1.192872000000  | -1.833227000000 |
| O  | -0.848801000000 | -1.803929000000 | -3.949422000000 |
| C  | -0.087591000000 | -0.831008000000 | -4.713649000000 |
| C  | -2.001684000000 | -2.137489000000 | -4.756473000000 |
| C  | -1.123522000000 | -0.031462000000 | -5.529809000000 |
| H  | 0.614457000000  | -1.377934000000 | -5.350997000000 |
| H  | 0.470226000000  | -0.231161000000 | -4.000021000000 |
| C  | -2.455432000000 | -0.791401000000 | -5.309646000000 |
| H  | -1.687806000000 | -2.829531000000 | -5.547827000000 |
| H  | -2.729034000000 | -2.631897000000 | -4.116557000000 |
| H  | -1.196439000000 | 0.993703000000  | -5.167158000000 |

|    |                 |                 |                 |
|----|-----------------|-----------------|-----------------|
| H  | -0.843949000000 | -0.005778000000 | -6.584707000000 |
| H  | -3.044630000000 | -0.895656000000 | -6.221793000000 |
| H  | -3.064195000000 | -0.282614000000 | -4.560642000000 |
| O  | -0.358866000000 | -4.093340000000 | -1.848693000000 |
| C  | -0.272953000000 | -5.074207000000 | -0.754694000000 |
| C  | 0.447113000000  | -4.544495000000 | -2.978510000000 |
| C  | 0.313537000000  | -6.322717000000 | -1.396537000000 |
| H  | -1.277711000000 | -5.199892000000 | -0.352703000000 |
| H  | 0.381363000000  | -4.666919000000 | 0.015763000000  |
| C  | 1.255977000000  | -5.722255000000 | -2.448097000000 |
| H  | -0.237482000000 | -4.836551000000 | -3.780850000000 |
| H  | 1.057024000000  | -3.705039000000 | -3.312092000000 |
| H  | 0.835456000000  | -6.933478000000 | -0.661104000000 |
| H  | -0.468493000000 | -6.921808000000 | -1.873983000000 |
| H  | 1.528325000000  | -6.423249000000 | -3.239130000000 |
| H  | 2.166499000000  | -5.366466000000 | -1.961513000000 |
| C  | -4.013044000000 | 5.647044000000  | 1.245361000000  |
| C  | -3.697290000000 | 4.290361000000  | 1.112858000000  |
| C  | -2.558835000000 | 3.692621000000  | 1.701794000000  |
| C  | -1.760672000000 | 4.584729000000  | 2.452128000000  |
| C  | -2.057941000000 | 5.942052000000  | 2.612299000000  |
| C  | -3.189620000000 | 6.482513000000  | 2.000520000000  |
| H  | -4.900514000000 | 6.053511000000  | 0.766367000000  |
| H  | -4.373992000000 | 3.671866000000  | 0.522262000000  |
| H  | -0.859346000000 | 4.209699000000  | 2.939340000000  |
| H  | -1.411237000000 | 6.579154000000  | 3.211842000000  |
| H  | -3.428415000000 | 7.535295000000  | 2.114795000000  |
| Ca | -2.234507000000 | 1.264494000000  | 1.376345000000  |
| I  | 0.960774000000  | 1.647703000000  | 1.996264000000  |
| O  | -2.505424000000 | 0.632648000000  | 3.697519000000  |
| C  | -3.704886000000 | -0.149481000000 | 3.923765000000  |
| C  | -2.573708000000 | 1.721322000000  | 4.647268000000  |
| C  | -4.805451000000 | 0.898574000000  | 4.118437000000  |
| H  | -3.547994000000 | -0.768395000000 | 4.816485000000  |
| H  | -3.852068000000 | -0.777420000000 | 3.048304000000  |
| C  | -4.051713000000 | 2.142420000000  | 4.670295000000  |
| H  | -2.234924000000 | 1.347924000000  | 5.622114000000  |
| H  | -1.899848000000 | 2.502298000000  | 4.300095000000  |
| H  | -5.247785000000 | 1.118725000000  | 3.146490000000  |
| H  | -5.590034000000 | 0.544539000000  | 4.789704000000  |
| H  | -4.369867000000 | 2.414247000000  | 5.678625000000  |
| H  | -4.197916000000 | 3.002520000000  | 4.016174000000  |
| C  | 3.385110000000  | -5.862509000000 | 0.602504000000  |
| C  | 3.242030000000  | -4.474874000000 | 0.708146000000  |

|    |                 |                 |                 |
|----|-----------------|-----------------|-----------------|
| C  | 2.383392000000  | -3.847669000000 | 1.637487000000  |
| C  | 1.652095000000  | -4.747972000000 | 2.445374000000  |
| C  | 1.768148000000  | -6.138604000000 | 2.359065000000  |
| C  | 2.648165000000  | -6.704372000000 | 1.435865000000  |
| H  | 4.068520000000  | -6.289300000000 | -0.127843000000 |
| H  | 3.818629000000  | -3.860318000000 | 0.016548000000  |
| H  | 0.933568000000  | -4.352874000000 | 3.164265000000  |
| H  | 1.176772000000  | -6.780809000000 | 3.006995000000  |
| H  | 2.755854000000  | -7.782306000000 | 1.365457000000  |
| Ca | 1.932254000000  | -1.429600000000 | 1.821000000000  |
| I  | -1.214285000000 | -2.075344000000 | 1.450486000000  |
| O  | 1.553678000000  | -1.430581000000 | 4.149229000000  |
| C  | 2.200953000000  | -2.388289000000 | 5.025306000000  |
| C  | 0.359036000000  | -0.975470000000 | 4.829128000000  |
| C  | 1.070494000000  | -3.031102000000 | 5.860463000000  |
| H  | 2.917645000000  | -1.849779000000 | 5.653508000000  |
| H  | 2.732119000000  | -3.094643000000 | 4.387874000000  |
| C  | -0.200267000000 | -2.253748000000 | 5.439940000000  |
| H  | 0.645397000000  | -0.238814000000 | 5.589715000000  |
| H  | -0.293425000000 | -0.501040000000 | 4.099823000000  |
| H  | 1.271086000000  | -2.915445000000 | 6.927492000000  |
| H  | 0.978688000000  | -4.097204000000 | 5.651112000000  |
| H  | -0.874824000000 | -2.056814000000 | 6.274889000000  |
| H  | -0.751990000000 | -2.799505000000 | 4.671882000000  |
| O  | 4.127174000000  | -0.622946000000 | 1.889032000000  |
| C  | 5.191627000000  | -1.289062000000 | 1.154969000000  |
| C  | 4.628582000000  | 0.627908000000  | 2.459843000000  |
| C  | 6.473219000000  | -0.764813000000 | 1.785823000000  |
| H  | 5.113693000000  | -1.005133000000 | 0.102077000000  |
| H  | 5.034265000000  | -2.361582000000 | 1.264454000000  |
| C  | 6.108730000000  | 0.698910000000  | 2.077910000000  |
| H  | 4.464786000000  | 0.570724000000  | 3.539062000000  |
| H  | 4.050019000000  | 1.449130000000  | 2.041942000000  |
| H  | 6.690243000000  | -1.310295000000 | 2.709224000000  |
| H  | 7.329492000000  | -0.861143000000 | 1.116025000000  |
| H  | 6.713519000000  | 1.137788000000  | 2.873359000000  |
| H  | 6.229408000000  | 1.304541000000  | 1.180099000000  |
| C  | -7.004060000000 | -0.274751000000 | -0.238818000000 |
| H  | -6.898975000000 | -1.365275000000 | -0.278405000000 |
| H  | -6.231380000000 | 0.078702000000  | 0.449654000000  |
| C  | -8.399893000000 | 0.083765000000  | 0.276439000000  |
| H  | -9.183317000000 | -0.275229000000 | -0.400518000000 |
| H  | -8.517129000000 | 1.168426000000  | 0.370825000000  |
| H  | -8.585202000000 | -0.354963000000 | 1.261225000000  |



|   |                 |                 |                 |
|---|-----------------|-----------------|-----------------|
| C | -6.723112000000 | 0.308904000000  | -1.628269000000 |
| H | -6.932908000000 | 1.385181000000  | -1.616106000000 |
| H | -5.882233000000 | -1.679743000000 | -4.051574000000 |
| C | -5.261203000000 | 0.119815000000  | -2.087763000000 |
| H | -4.609372000000 | 0.613507000000  | -1.366120000000 |
| H | -5.122070000000 | 0.605733000000  | -3.060375000000 |
| F | -4.063682000000 | 0.389146000000  | 0.917316000000  |

## 7. References.

1. Takaoka, A.; Iwakiri, H.; Ishikawa, N. *Bull. Chem. Soc. Jpn* **1979**, *52*, 3377–3380.
2. Nielsen, M. K.; Ugaz, C. R.; Li, W.; Doyle, A. G. *J. Am. Chem. Soc.* **2015**, *137*, 9571–9574.
3. Li, X.; Jin, J.; Chen, P.; Liu, G. *Nat. Chem.* **2022**, *14*, 425–432.
4. Komeyama, K.; Ohata, R.; Kiguchi, S.; Osaka, I. *Chem. Commun.*, **2017**, *53*, 6401–6404.
5. Yang, C.-T.; Zhang, Z.-Q.; Liu, Y.-C.; Liu, L. *Angew. Chem. Int. Ed.* **2011**, *50*, 3904–3907.
6. Bica, K.; Gaertner, P. *Org. Lett.* **2006**, *8*, 733–735.
7. Shrestha, B.; Giri, R. *Beilstein J. Org. Chem.* **2015**, *11*, 2400–2407.
8. Ho, Y. A.; Leiendecker, M.; Liu, X.; Wang, C.; Alandini, N.; Rueping, M. *Org. Lett.* **2018**, *20*, 5644–5647.
9. Zhang, X.-Y.; Du, H.-Z.; Zhai, D.-D.; Guan, B.-T. *Org. Chem. Front.* **2020**, *7*, 1991–1996.
10. Gao, Y.; Yang, C.; Bai, S.; Liu, X.; Wu, Q.; Wang, J.; Jiang, C.; Qi, X. *Chem* **2020**, *6*, 675–688.
11. Aragón, J.; Sun, S.; Pascual, D.; Jaworski, S.; Lloret-Fillol, J. *Angew. Chem. Int. Ed.* **2022**, *61*, e202114365.
12. (a) Maeda, S.; Ohno, K.; Morokuma, K. *Phys. Chem. Chem. Phys.* **2013**, *15*, 3683–3701; (b) Maeda, S.; Harabuchi, Y.; Takagi, M.; Taketsugu, T.; Morokuma, K. *Chem. Rec.* **2016**, *16*, 2232–2248; (c) Maeda, S.; Harabuchi, Y.; Takagi, M.; Saita, K.; Suzuki, K.; Ichino, T.; Sumiya, Y.; Sugiyama, K.; Ono, Y. *J. Comput. Chem.* **2018**, *39*, 233–251; (d) Maeda, S.; Harabuchi, Y.; *WIREs Comput. Mol. Sci.* **2021**, *11*, e1538.
13. Grimme, S.; Bannwarth, C.; Shushkov, P. *J. Chem. Theory Comput.* **2017**, *13*, 1989–2009.
14. Neese, F. *WIREs Comput. Mol. Sci.* **2018**, *8*, e1327.
15. (a) Becke, A. D. *Phys. Rev. A* **1988**, *38*, 3098–3100; (b) Becke, A. D. *J. Chem. Phys.* **1993**, *98*, 1372–1377; (c) Becke, A. D. *J. Chem. Phys.* **1993**, *98*, 5648–5652; (d) Lee, C.; Yang, W.; Parr, R. G. *Phys. Rev. B* **1988**, *37*, 785–789.
16. Gaussian 16, Revision C.01, Frisch, M. J.; Trucks, G. W.; Schlegel, H. B.; Scuseria, G. E.; Robb, M. A.; Cheeseman, J. R.; Scalmani, G.; Barone, V.; Petersson, G. A.; Nakatsuji, H.; Li, X.; Caricato, M.; Marenich, A. V.; Bloino, J.; Janesko, B. G.; Gomperts, R.; Mennucci, B.; Hratchian, H. P.; Ortiz, J. V.; Izmaylov, A. F.; Sonnenberg, J. L.; Williams-Young, D.; Ding, F.; Lipparini, F.; Egidi, F.; Goings, J.; Peng, B.; Petrone, A.; Henderson, T.; Ranasinghe, D.; Zakrzewski, V. G.; Gao, J.; Rega, N.; Zheng, G.; Liang, W.; Hada, M.; Ehara, M.; Toyota, K.; Fukuda, R.; Hasegawa, J.; Ishida, M.; Nakajima, T.; Honda, Y.; Kitao, O.; Nakai, H.; Vreven, T.; Throssell, K.; Montgomery, J. A.; Peralta, J. E.; Ogliaro, F.; Bearpark, M. J.; Heyd, J. J.; Brothers, E. N.; Kudin, K. N.; Staroverov, V. N.; Keith, T. A.; Kobayashi, R.; Normand, J.; Raghavachari, K.; Rendell, A. P.; Burant, J. C.; Iyengar, S. S.; Tomasi, J.; Cossi, M.; Millam, J. M.; Klene, M.; Adamo, C.; Cammi, R.; Ochterski, J. W.; Martin, R. L.; Morokuma, K.; Farkas, O.; Foresman, J. B.; Fox, D. J. Gaussian, Inc., Wallingford CT, 2016.
17. (a) Grimme, S.; Antony, J.; Ehrlich, S.; Krieg, H. *J. Chem. Phys.* **2010**, *132*, 154104. (b) Grimme, S.; Ehrlich, S.; Goerigk, L. *J. Comput. Chem.* **2011**, *32*, 1456–1465.
18. (a) McLean, A. D.; Chandler, G. S. *J. Chem. Phys.* **1980**, *72*, 5639–5648; (b) Krishnan, R.; Binkley, J. S.; Seeger, R.; Pople, J. A. *J. Chem. Phys.* **1980**, *72*, 650–654.
19. (a) Dolg, M.; Wedig, U.; Stoll, H.; Preuss, H. *J. Chem. Phys.* **1987**, *86*, 866–872; (b) Igel-Mann, G.; Stoll, H.; Preuss, H. *Mol. Phys.* **1988**, *65*, 1321–1328; (c) Bergner, A.; Dolg, M.; Kuechle, W.; Stoll, H.; Preuss, H. *Mol. Phys.* **1993**, *80*, 1431–1441.

20. Höllwarth, A.; Böhme, M.; Dapprich, S.; Ehlers, A. W.; Gobbi, A.; Jonas, V.; Köhler, K. F.; Stegmann, R.; Veldkamp, A.; Frenking, G. *Chem. Phys. Lett.* **1993**, *208*, 237–240.
21. Fukui, K. *Acc. Chem. Res.* **1981**, *14*, 363–368.
22. CYLview, 1.0b; Legault, C. Y. Université de Sherbrooke, 2009.

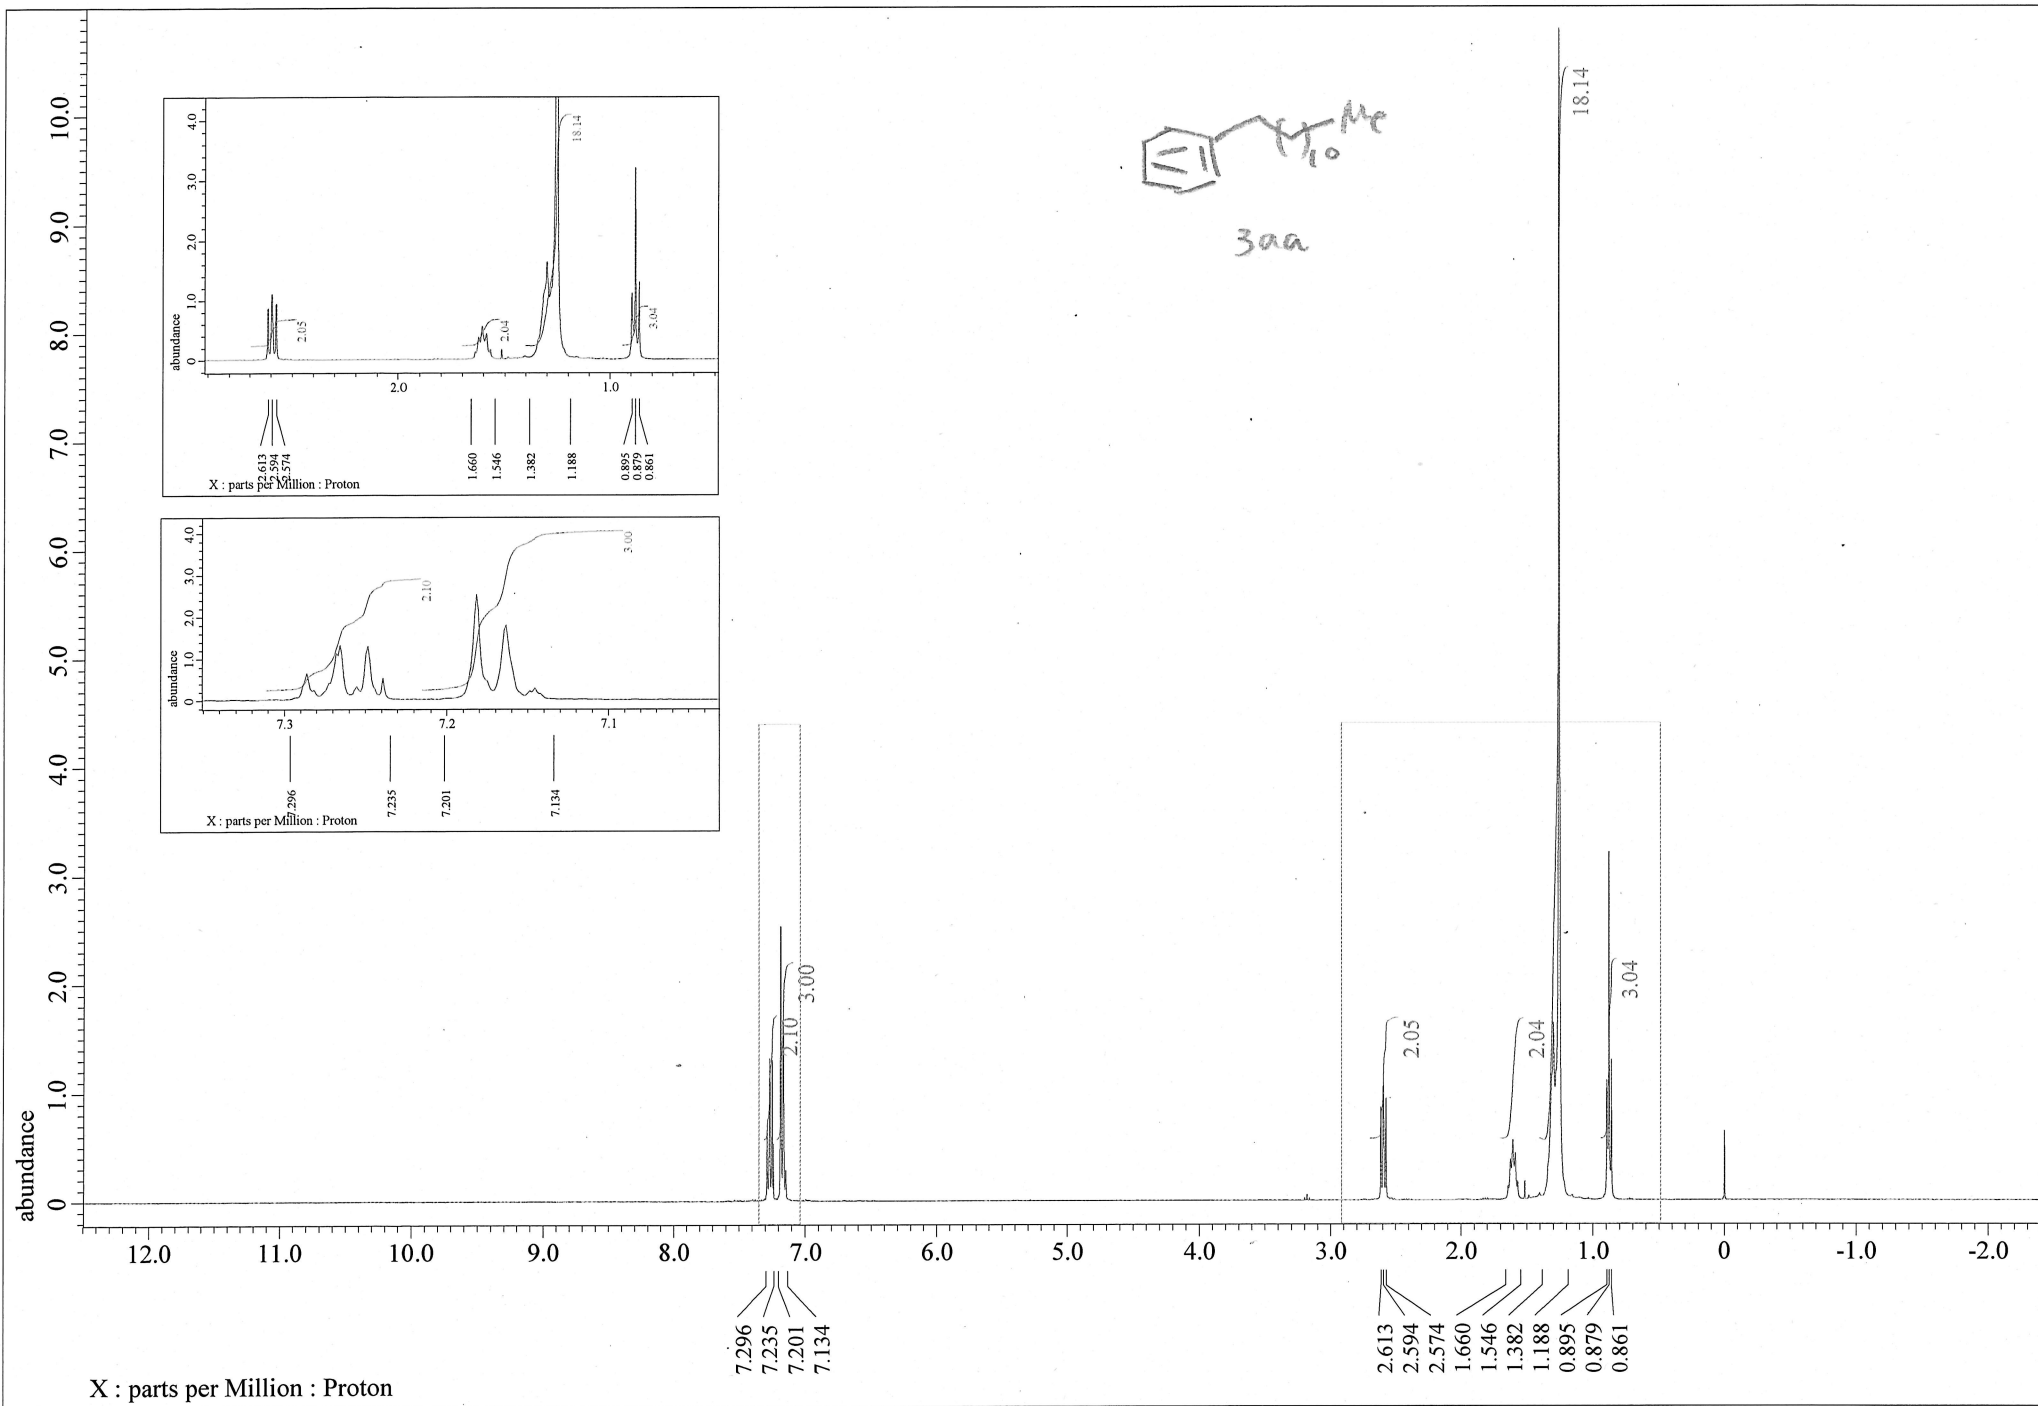

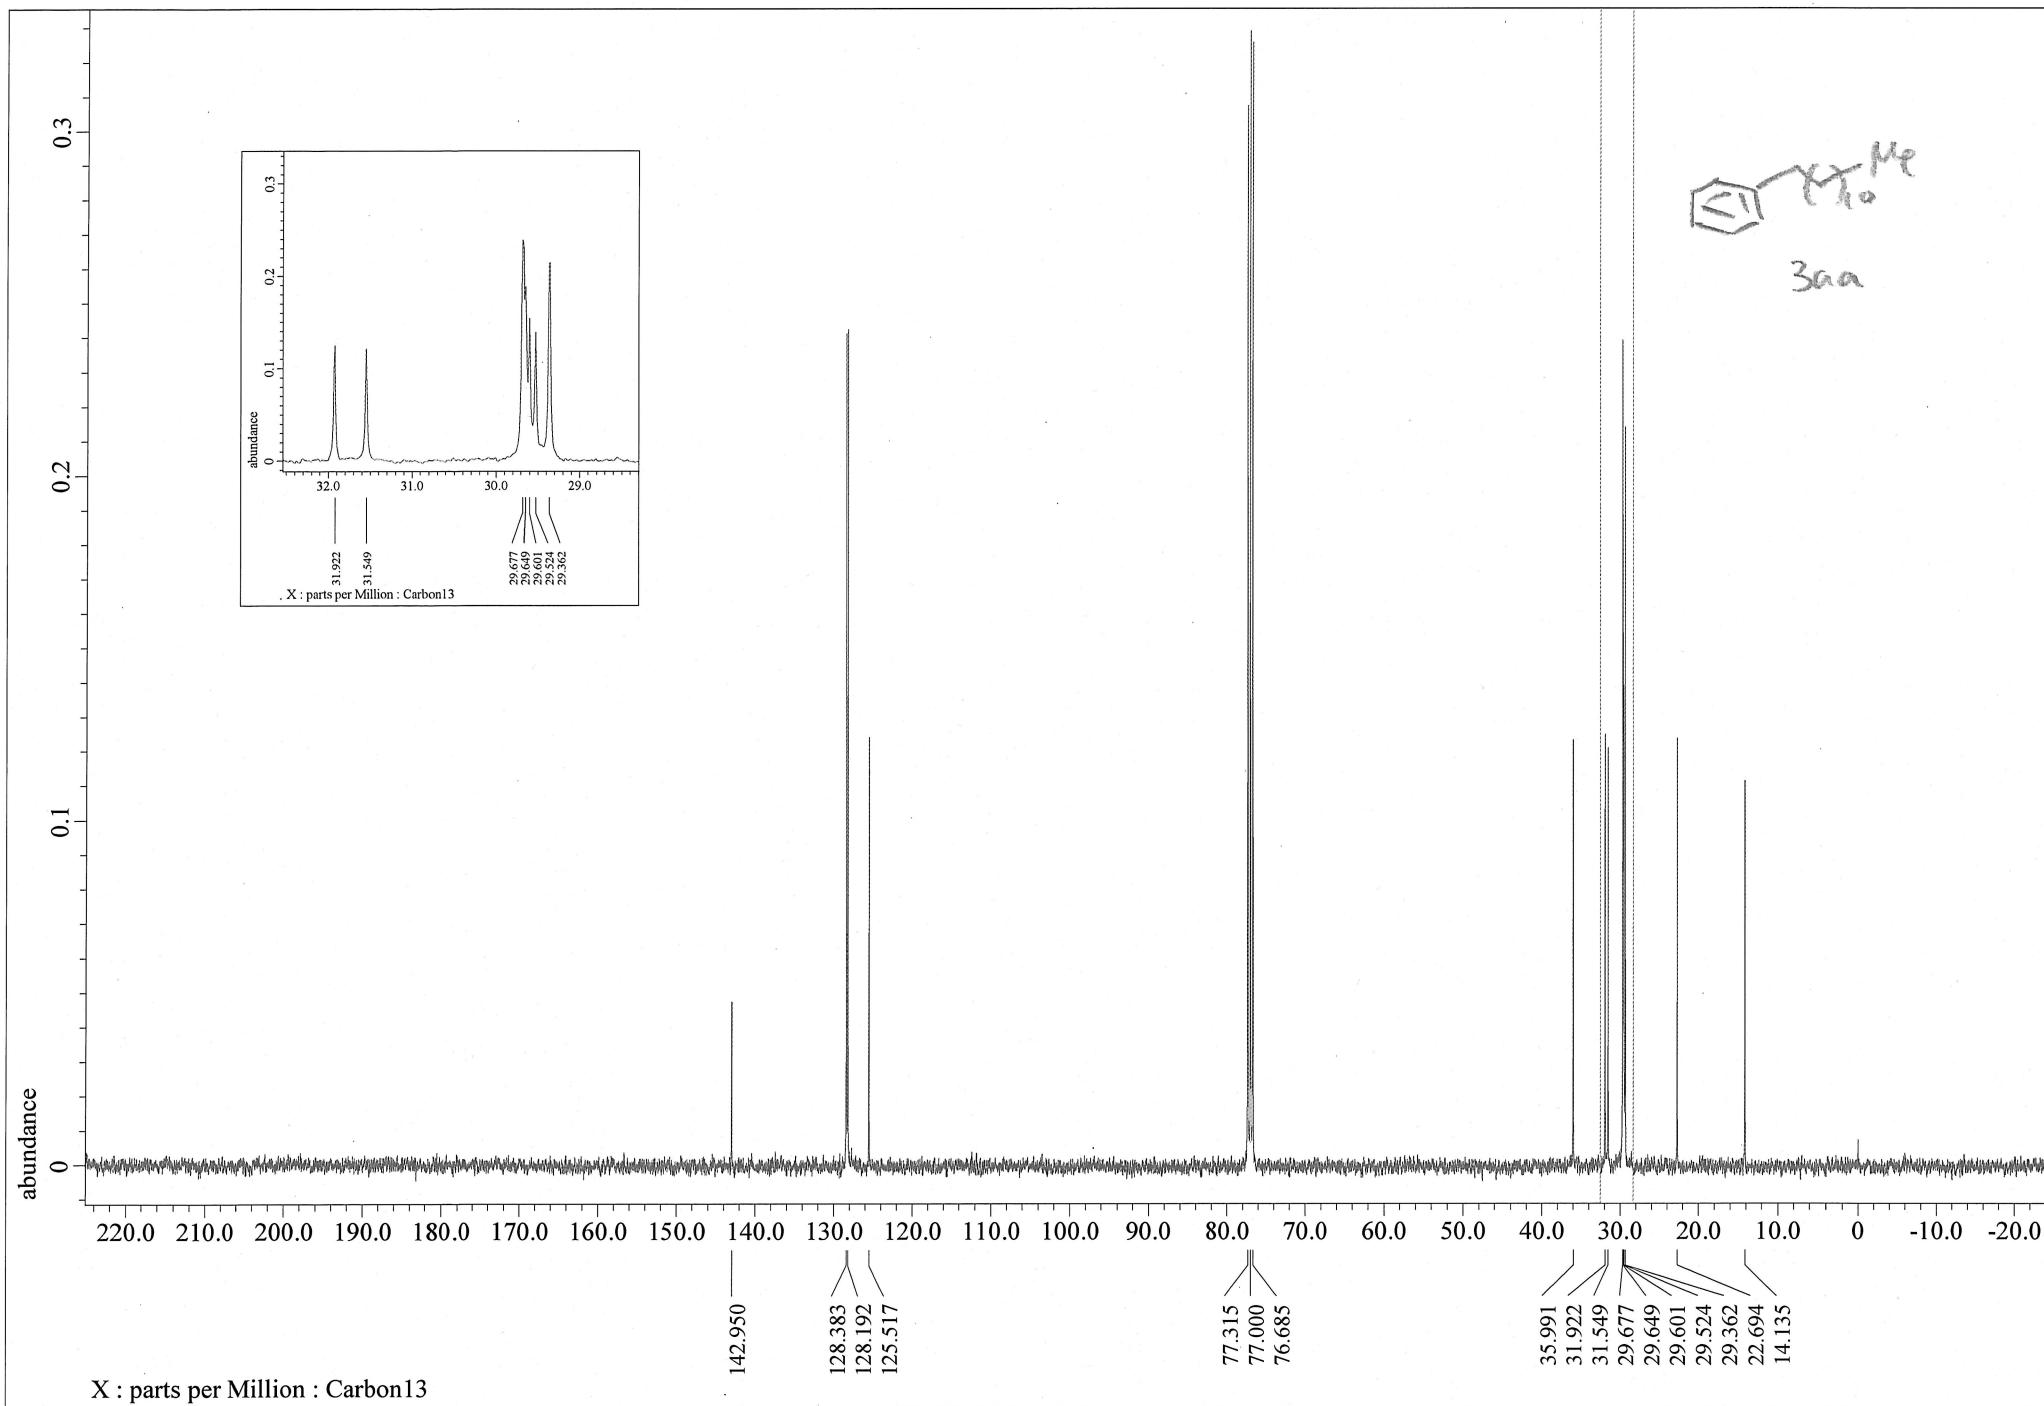

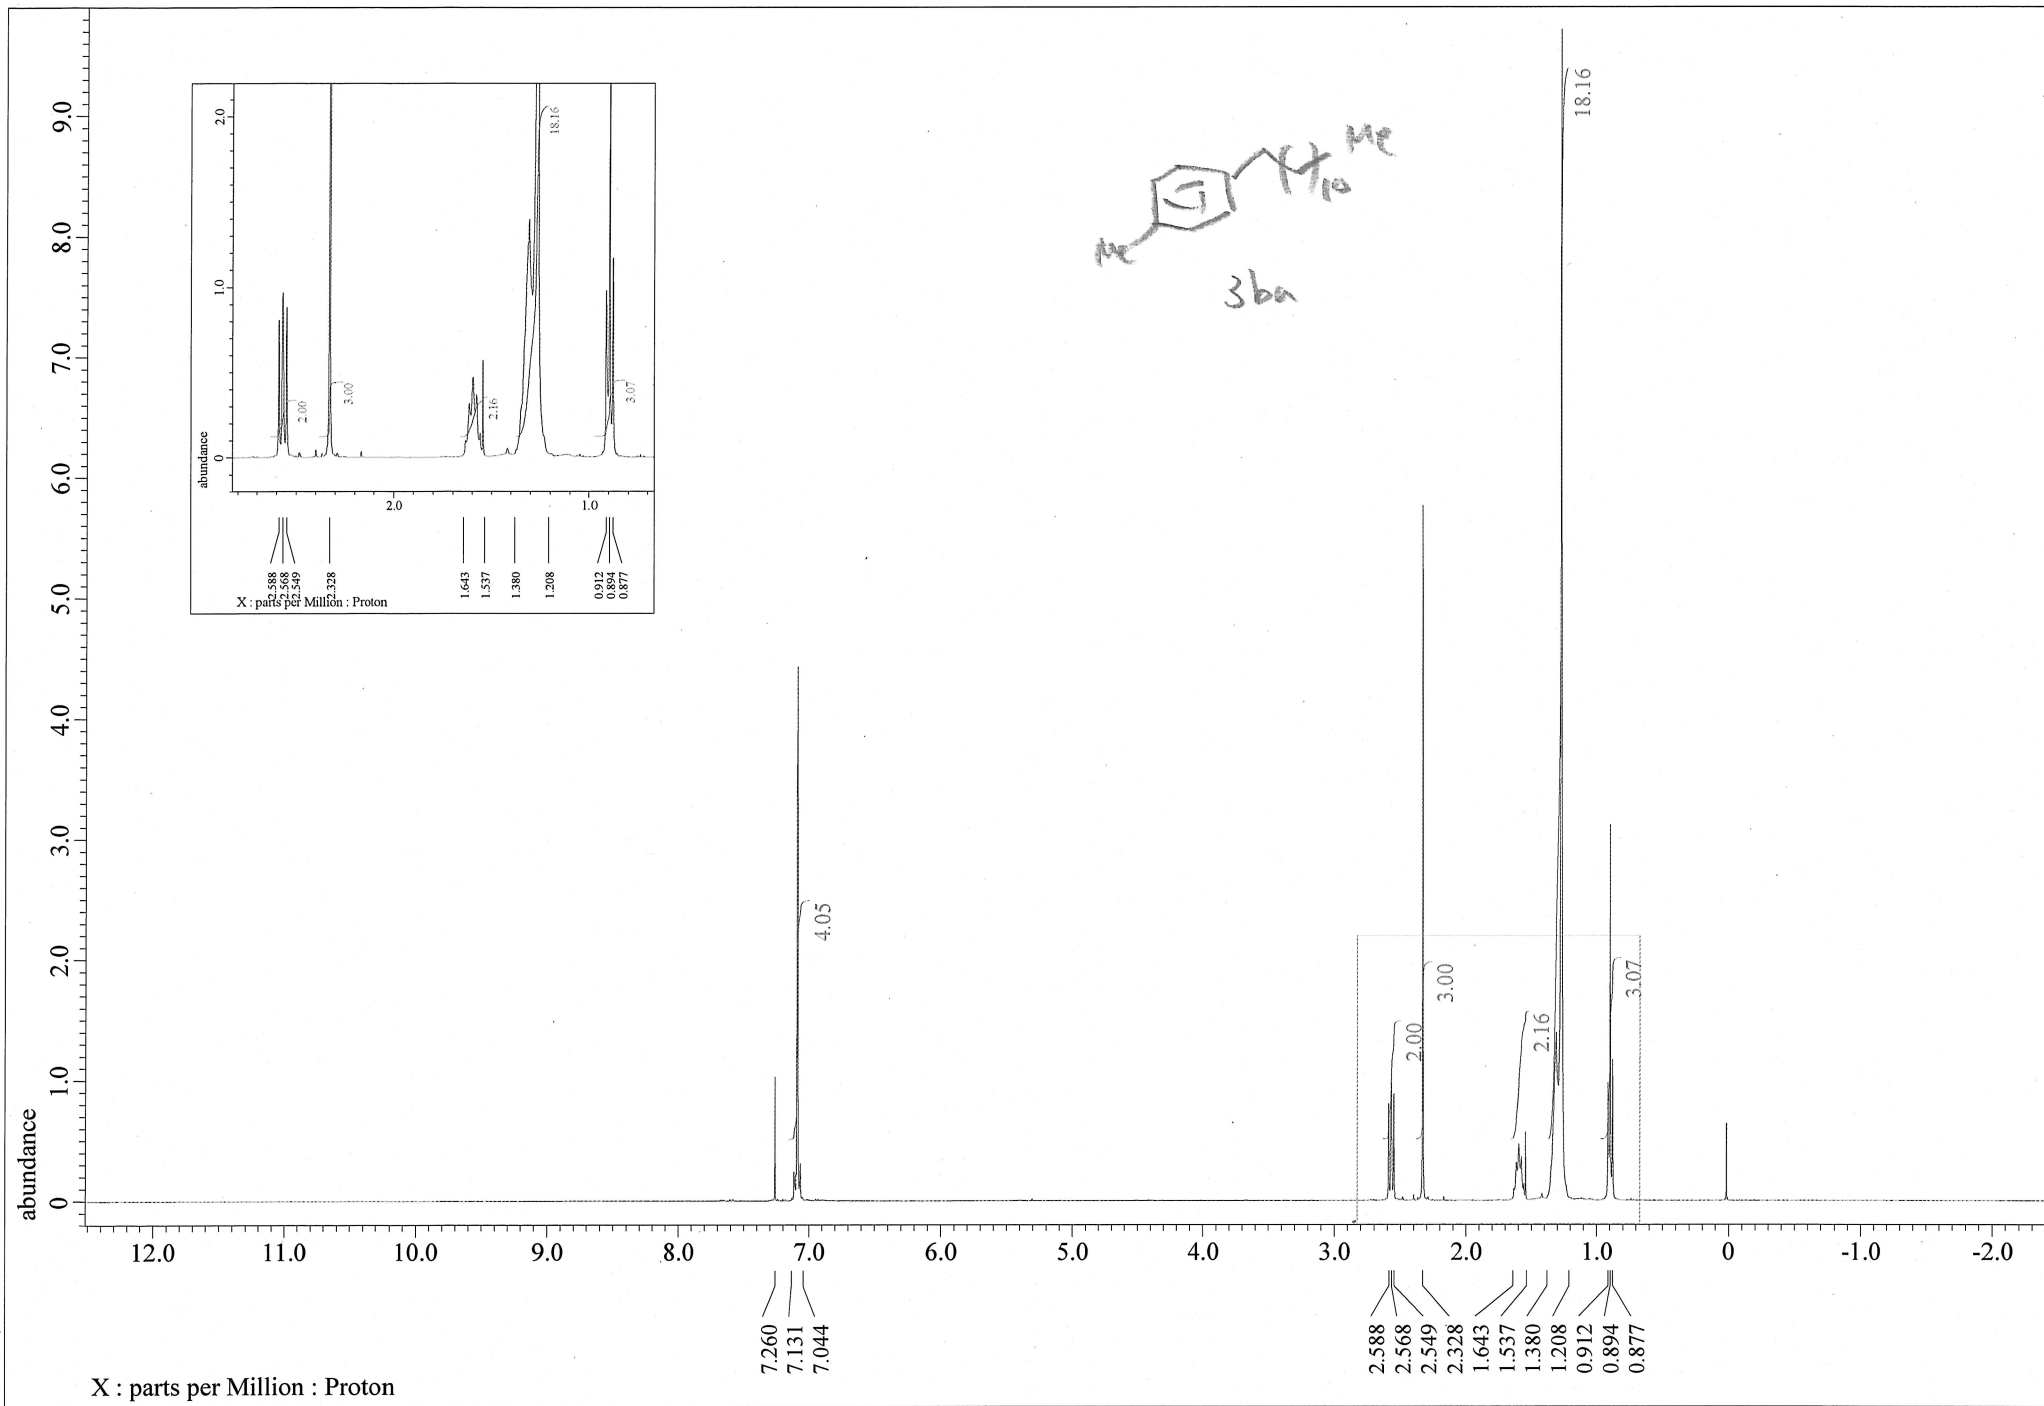

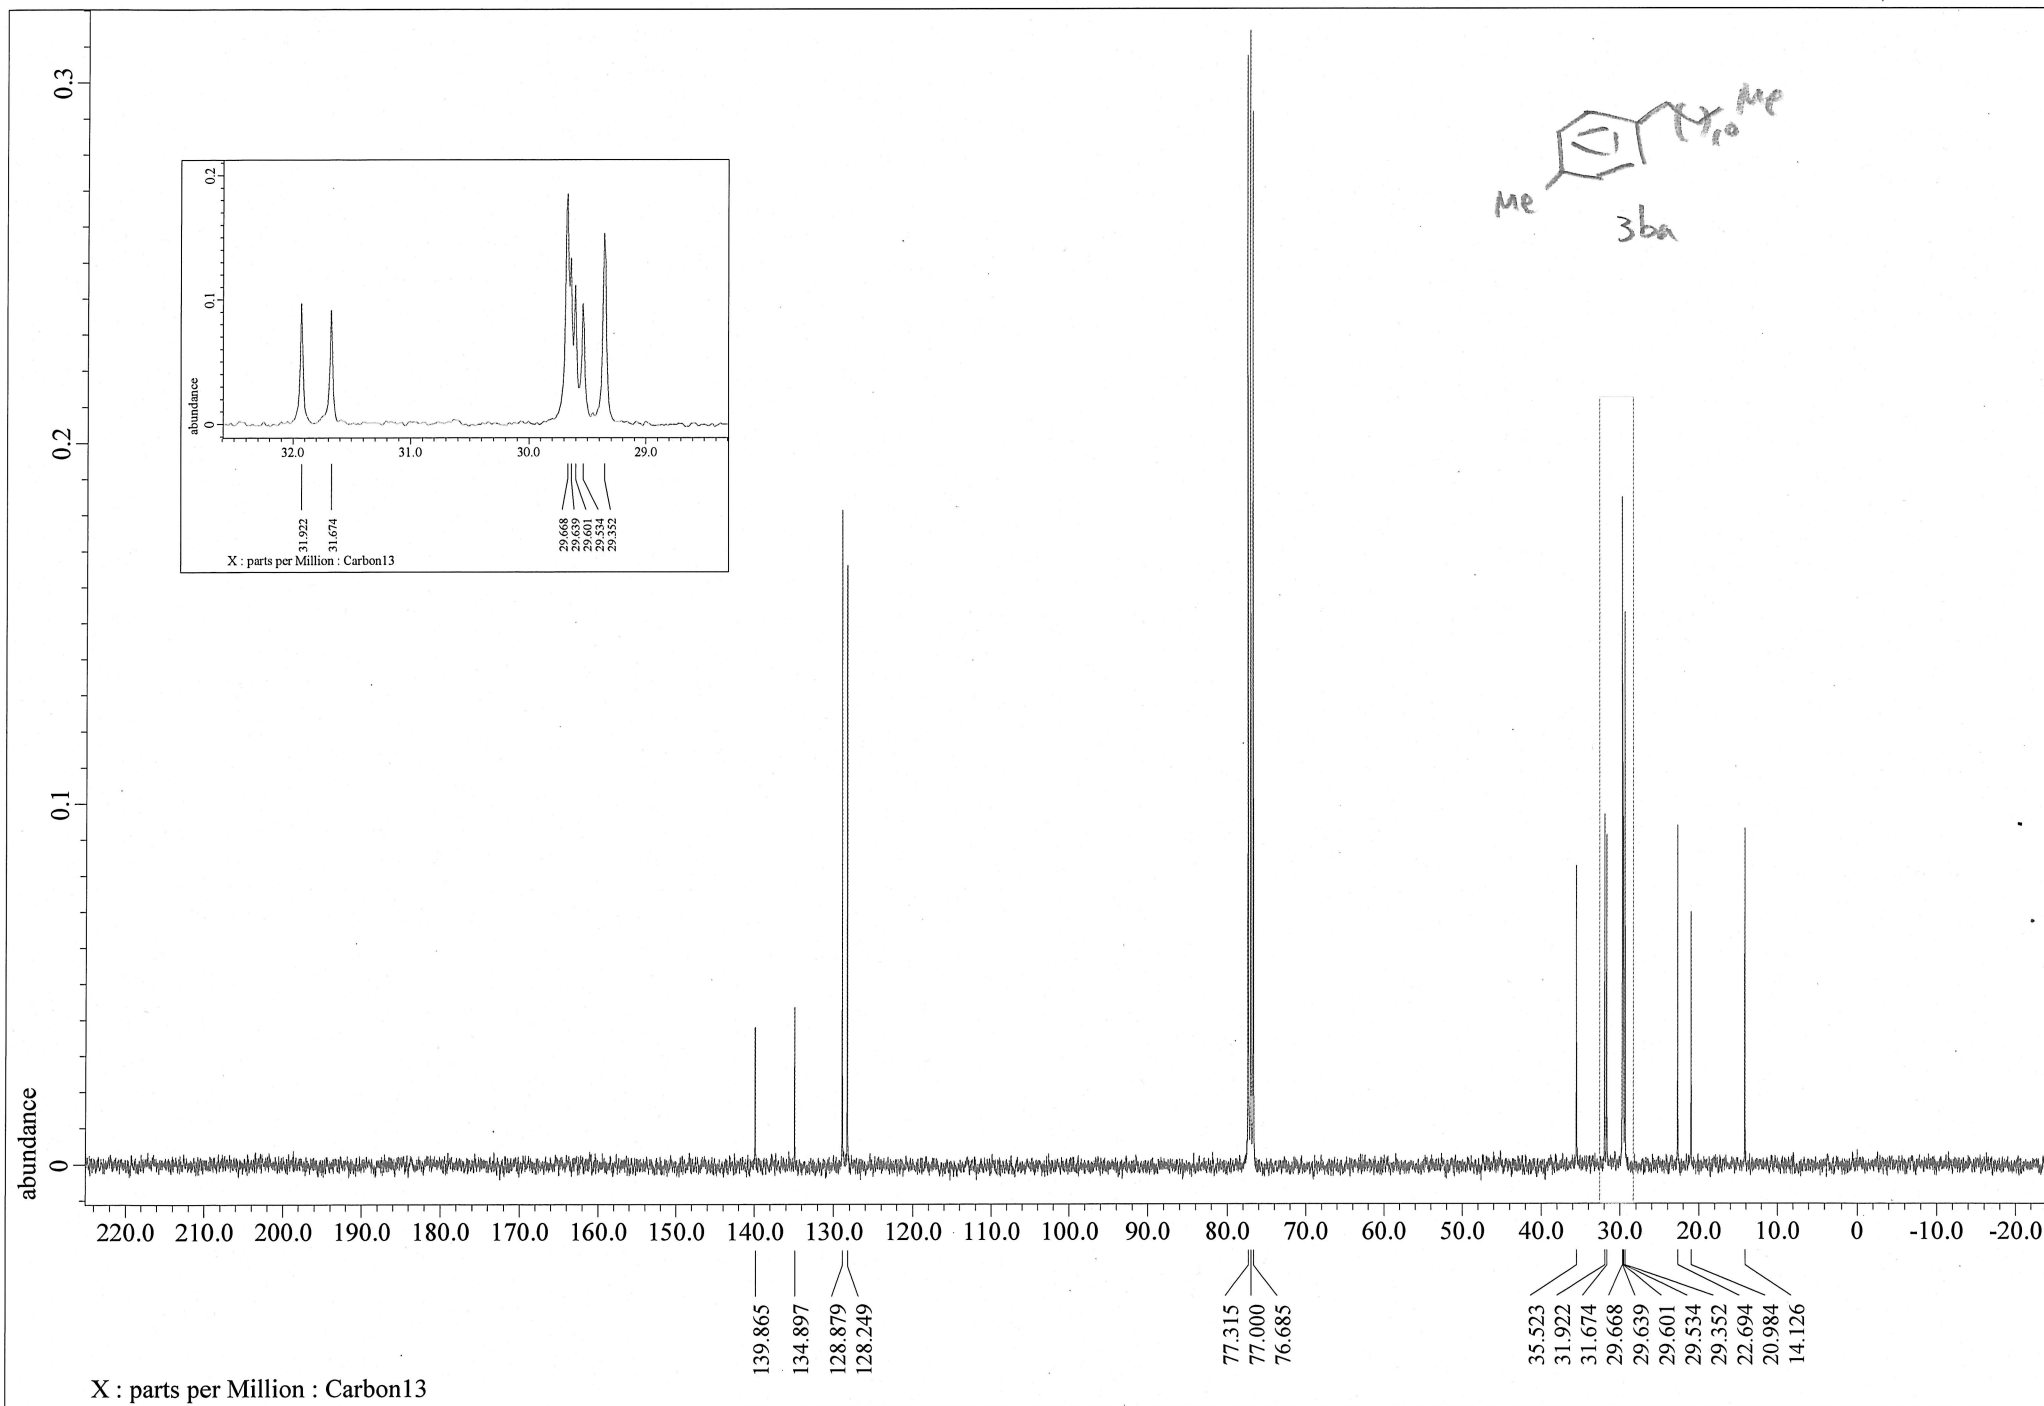

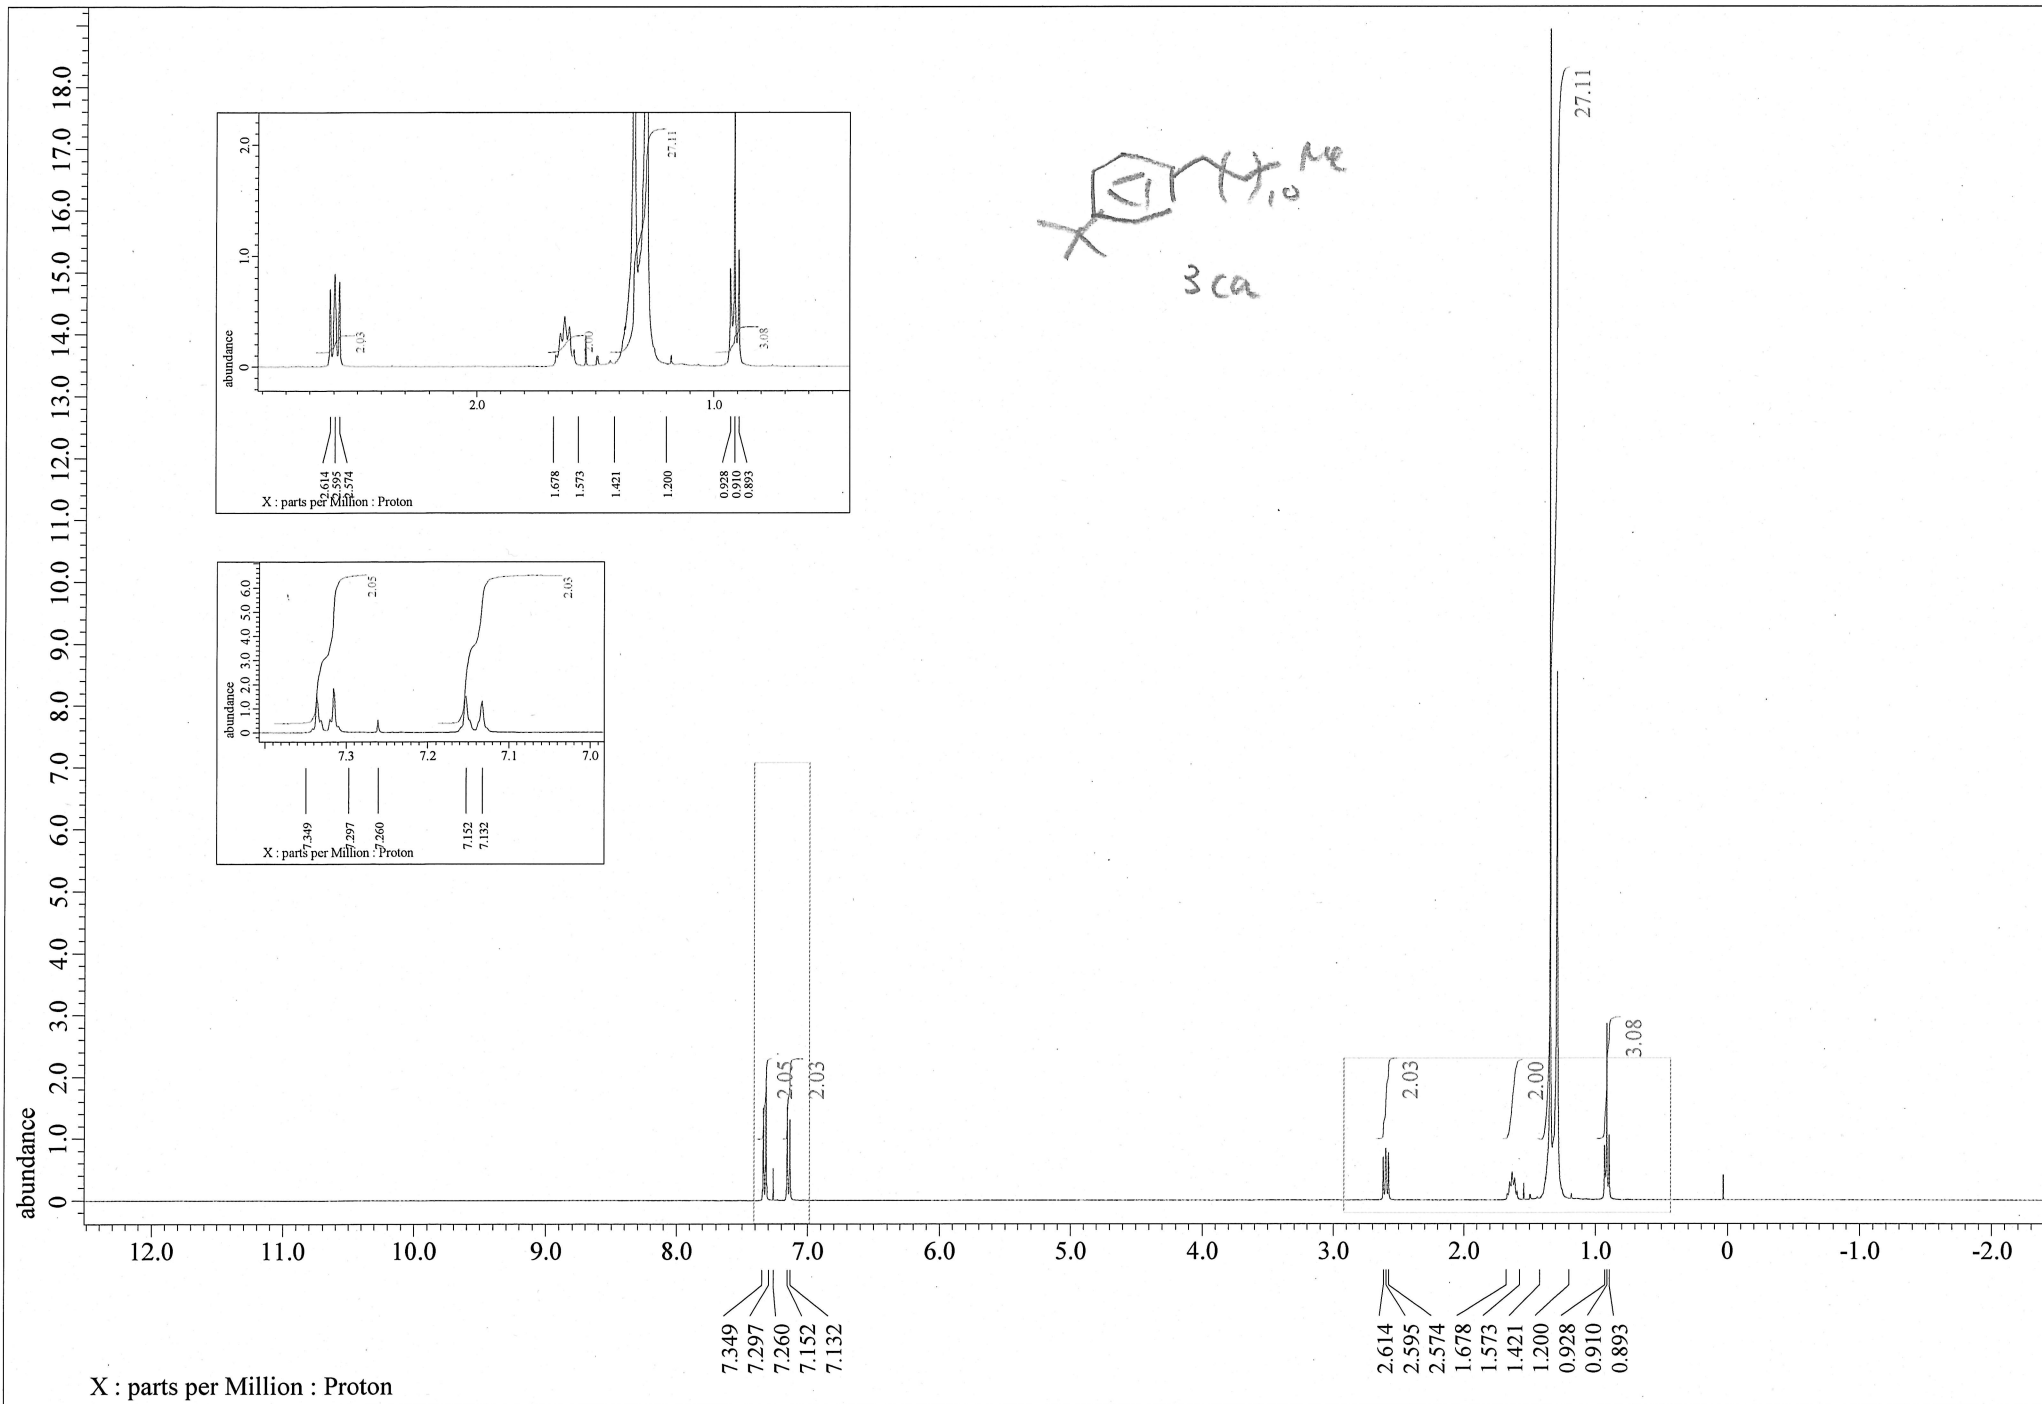



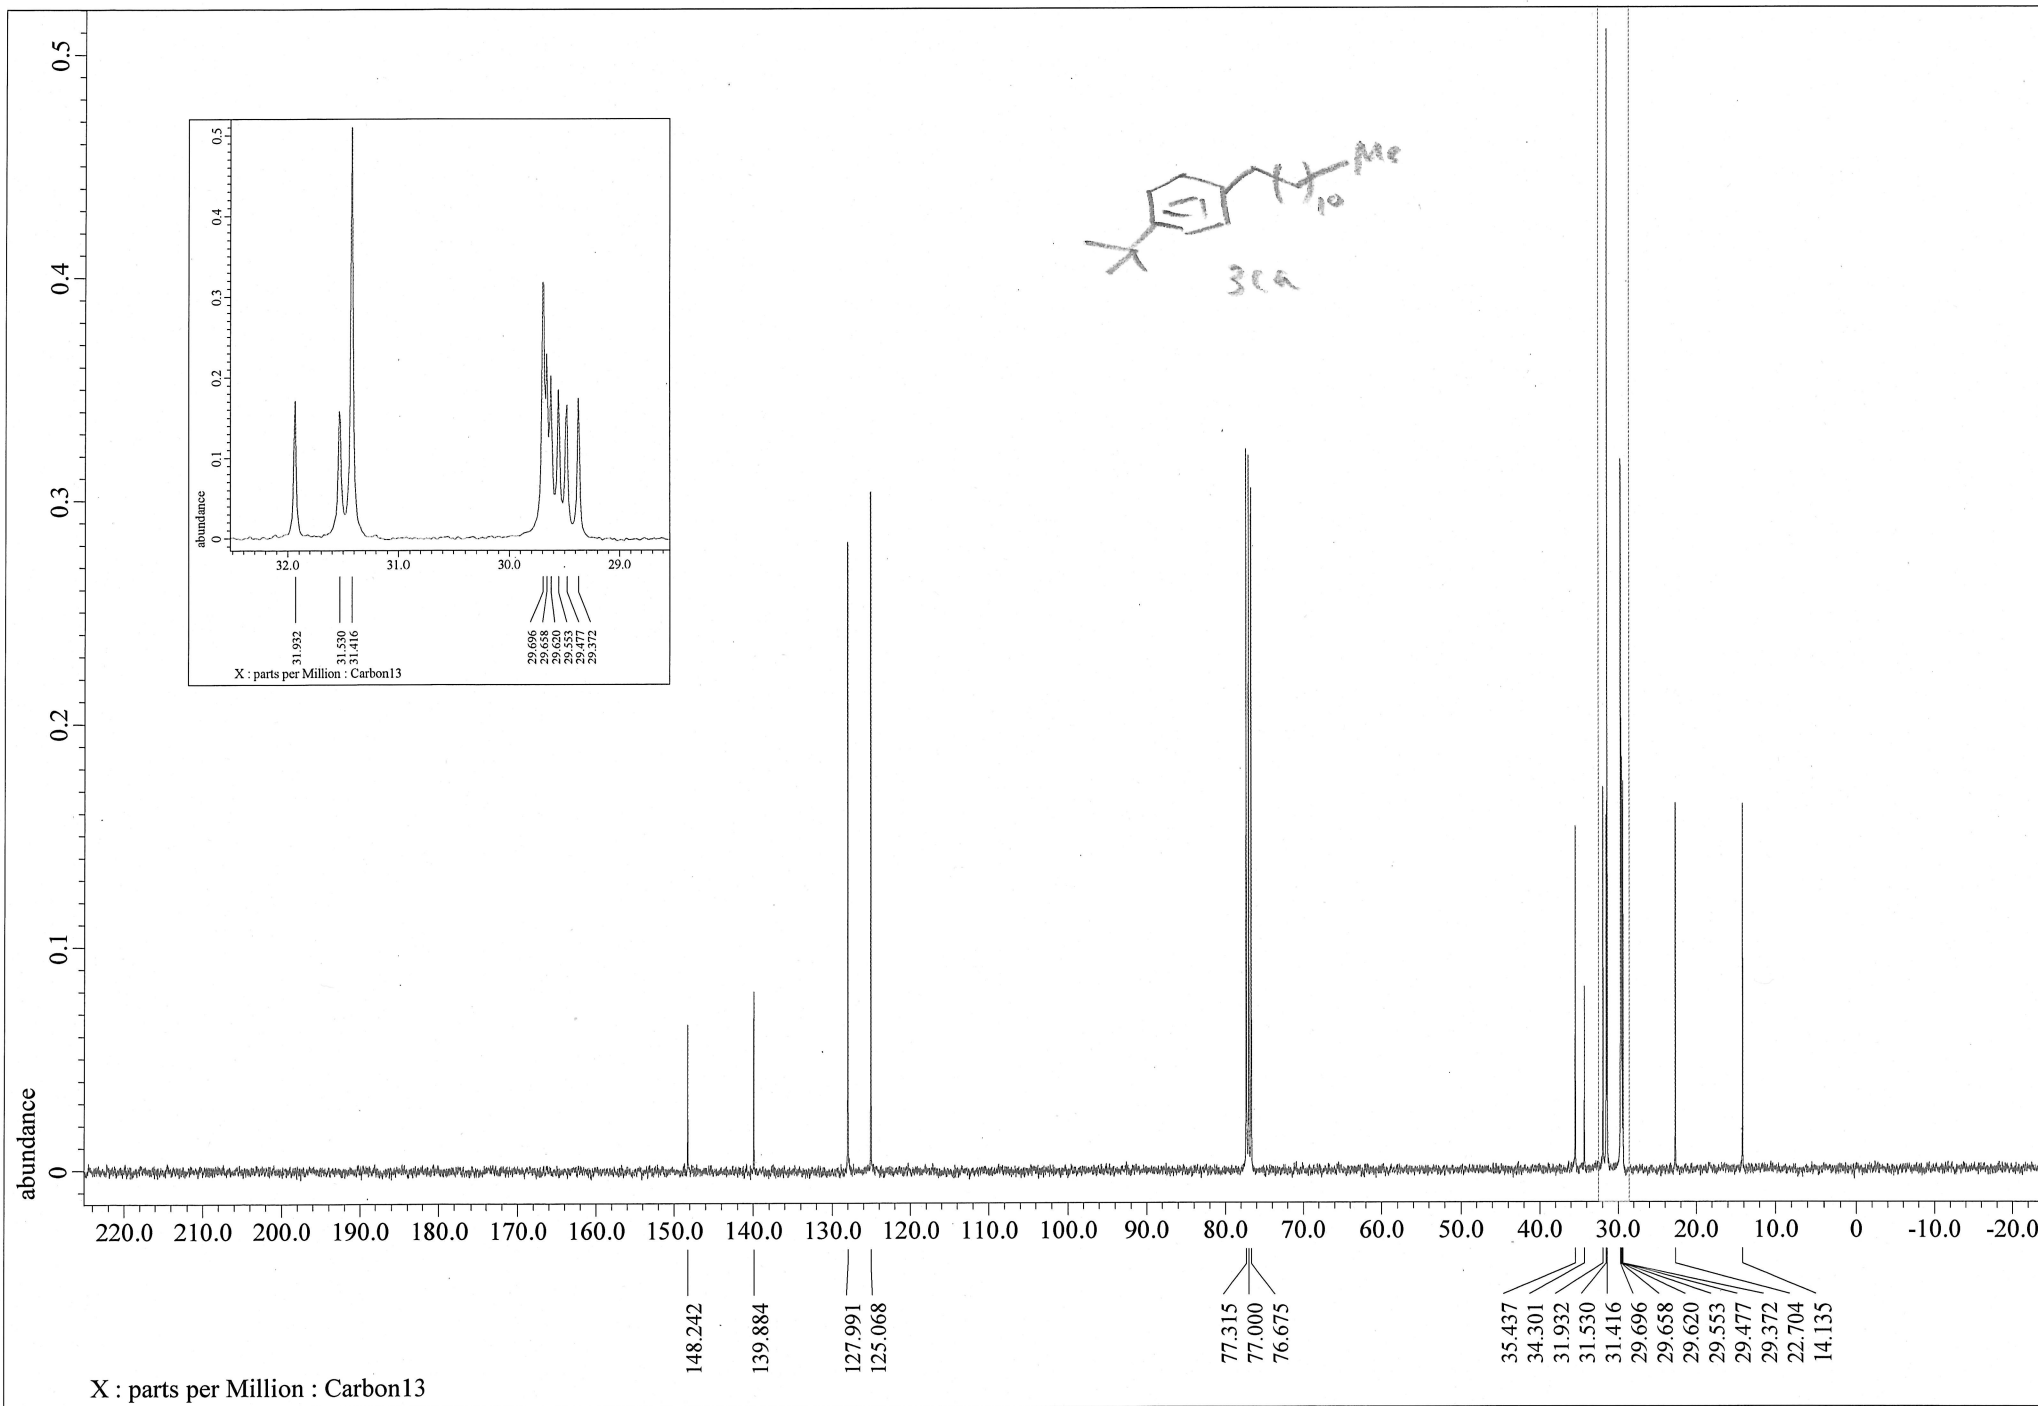

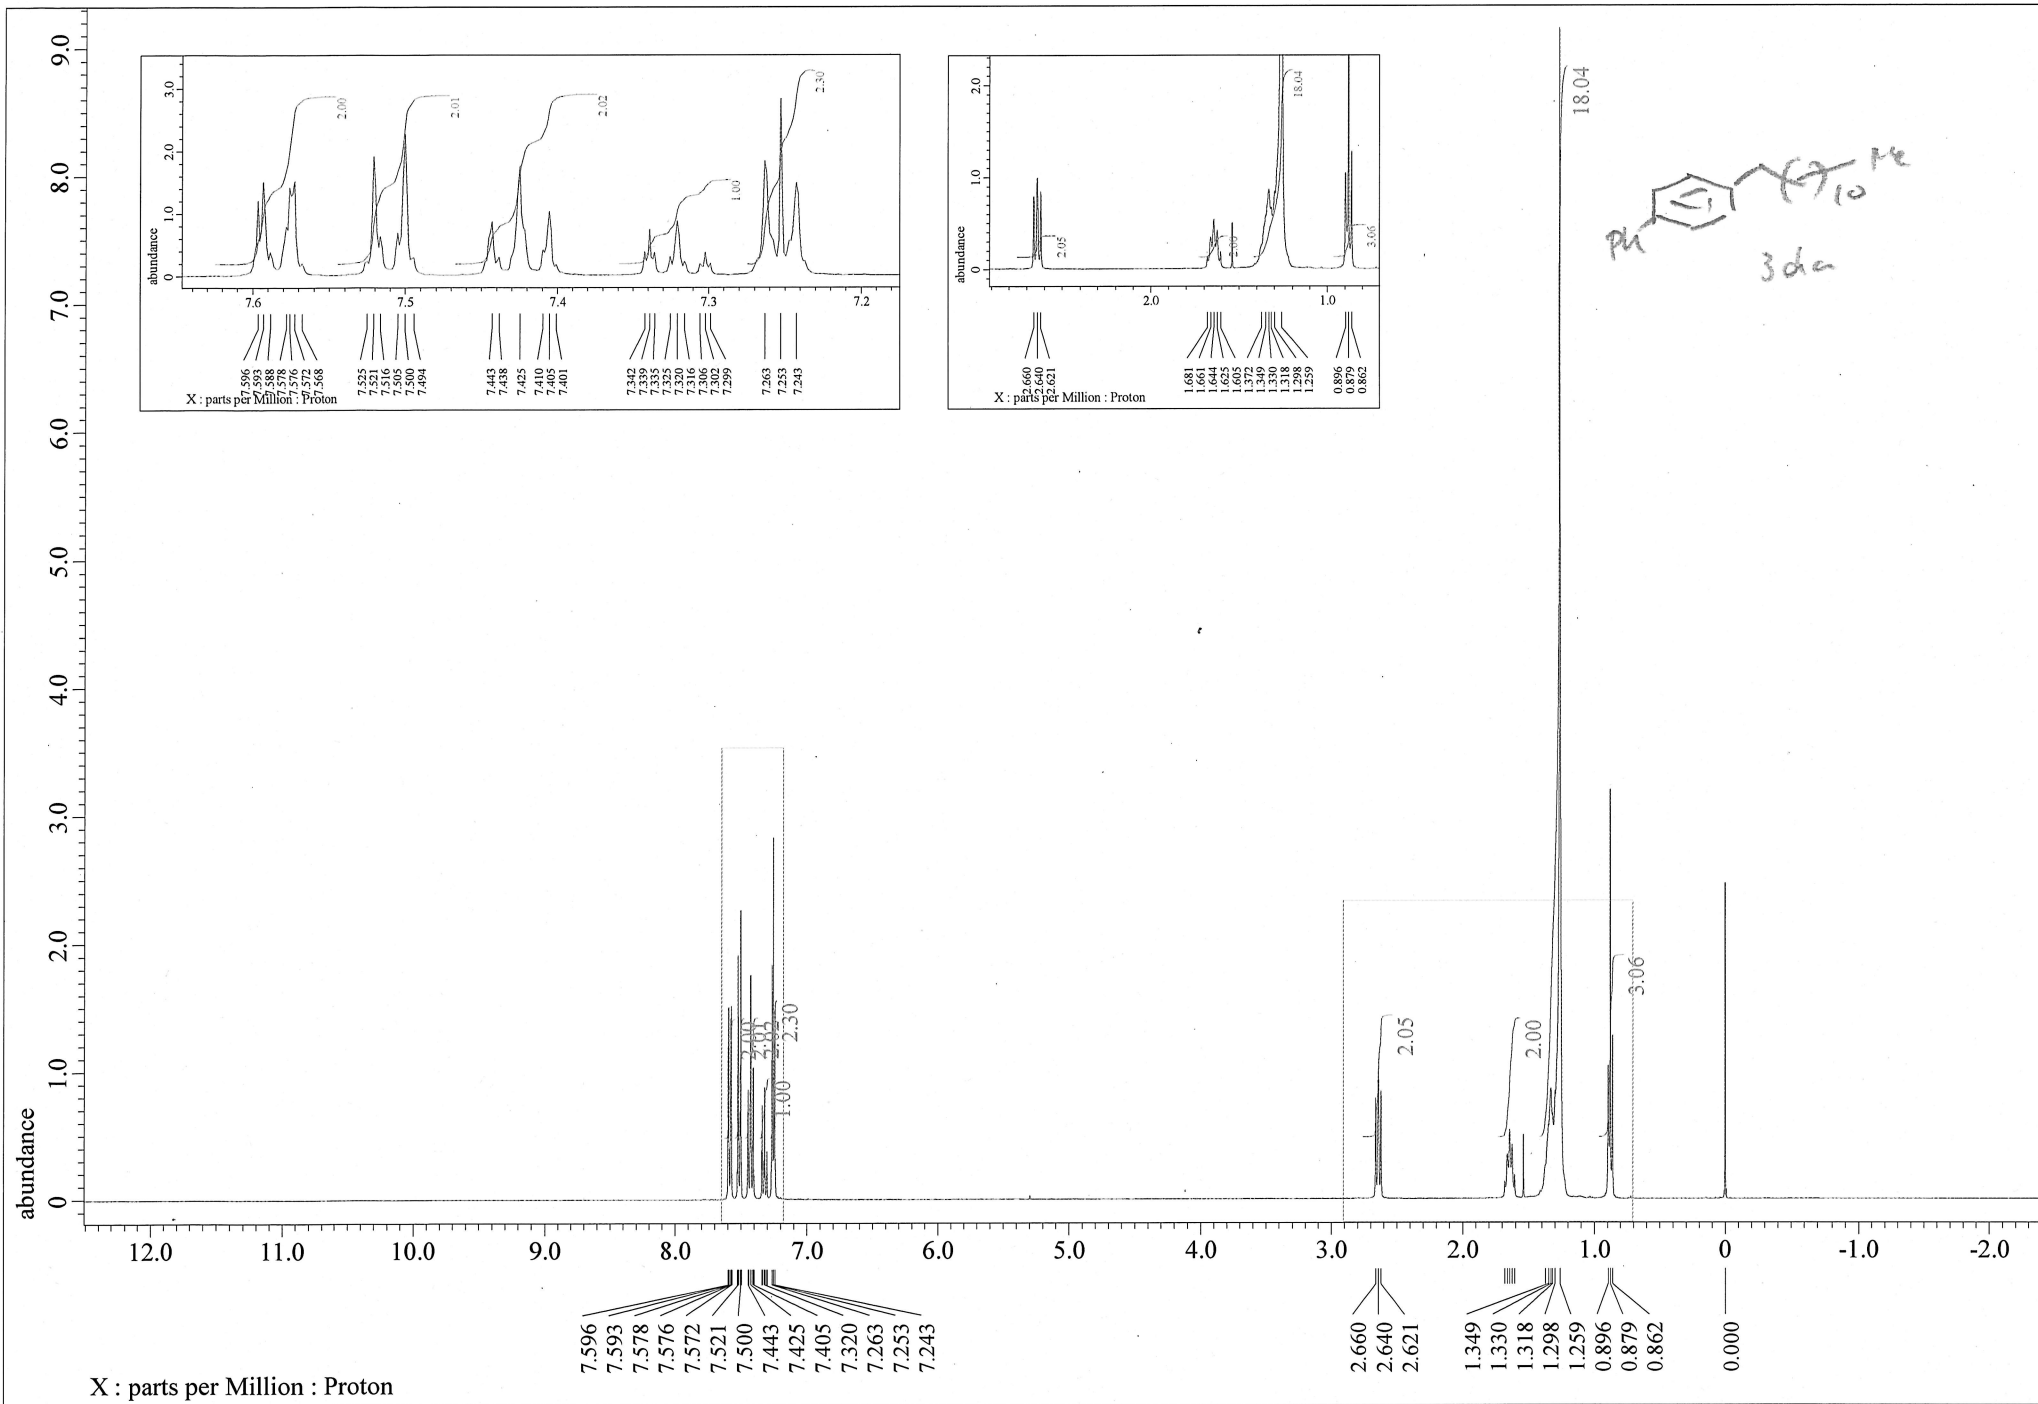

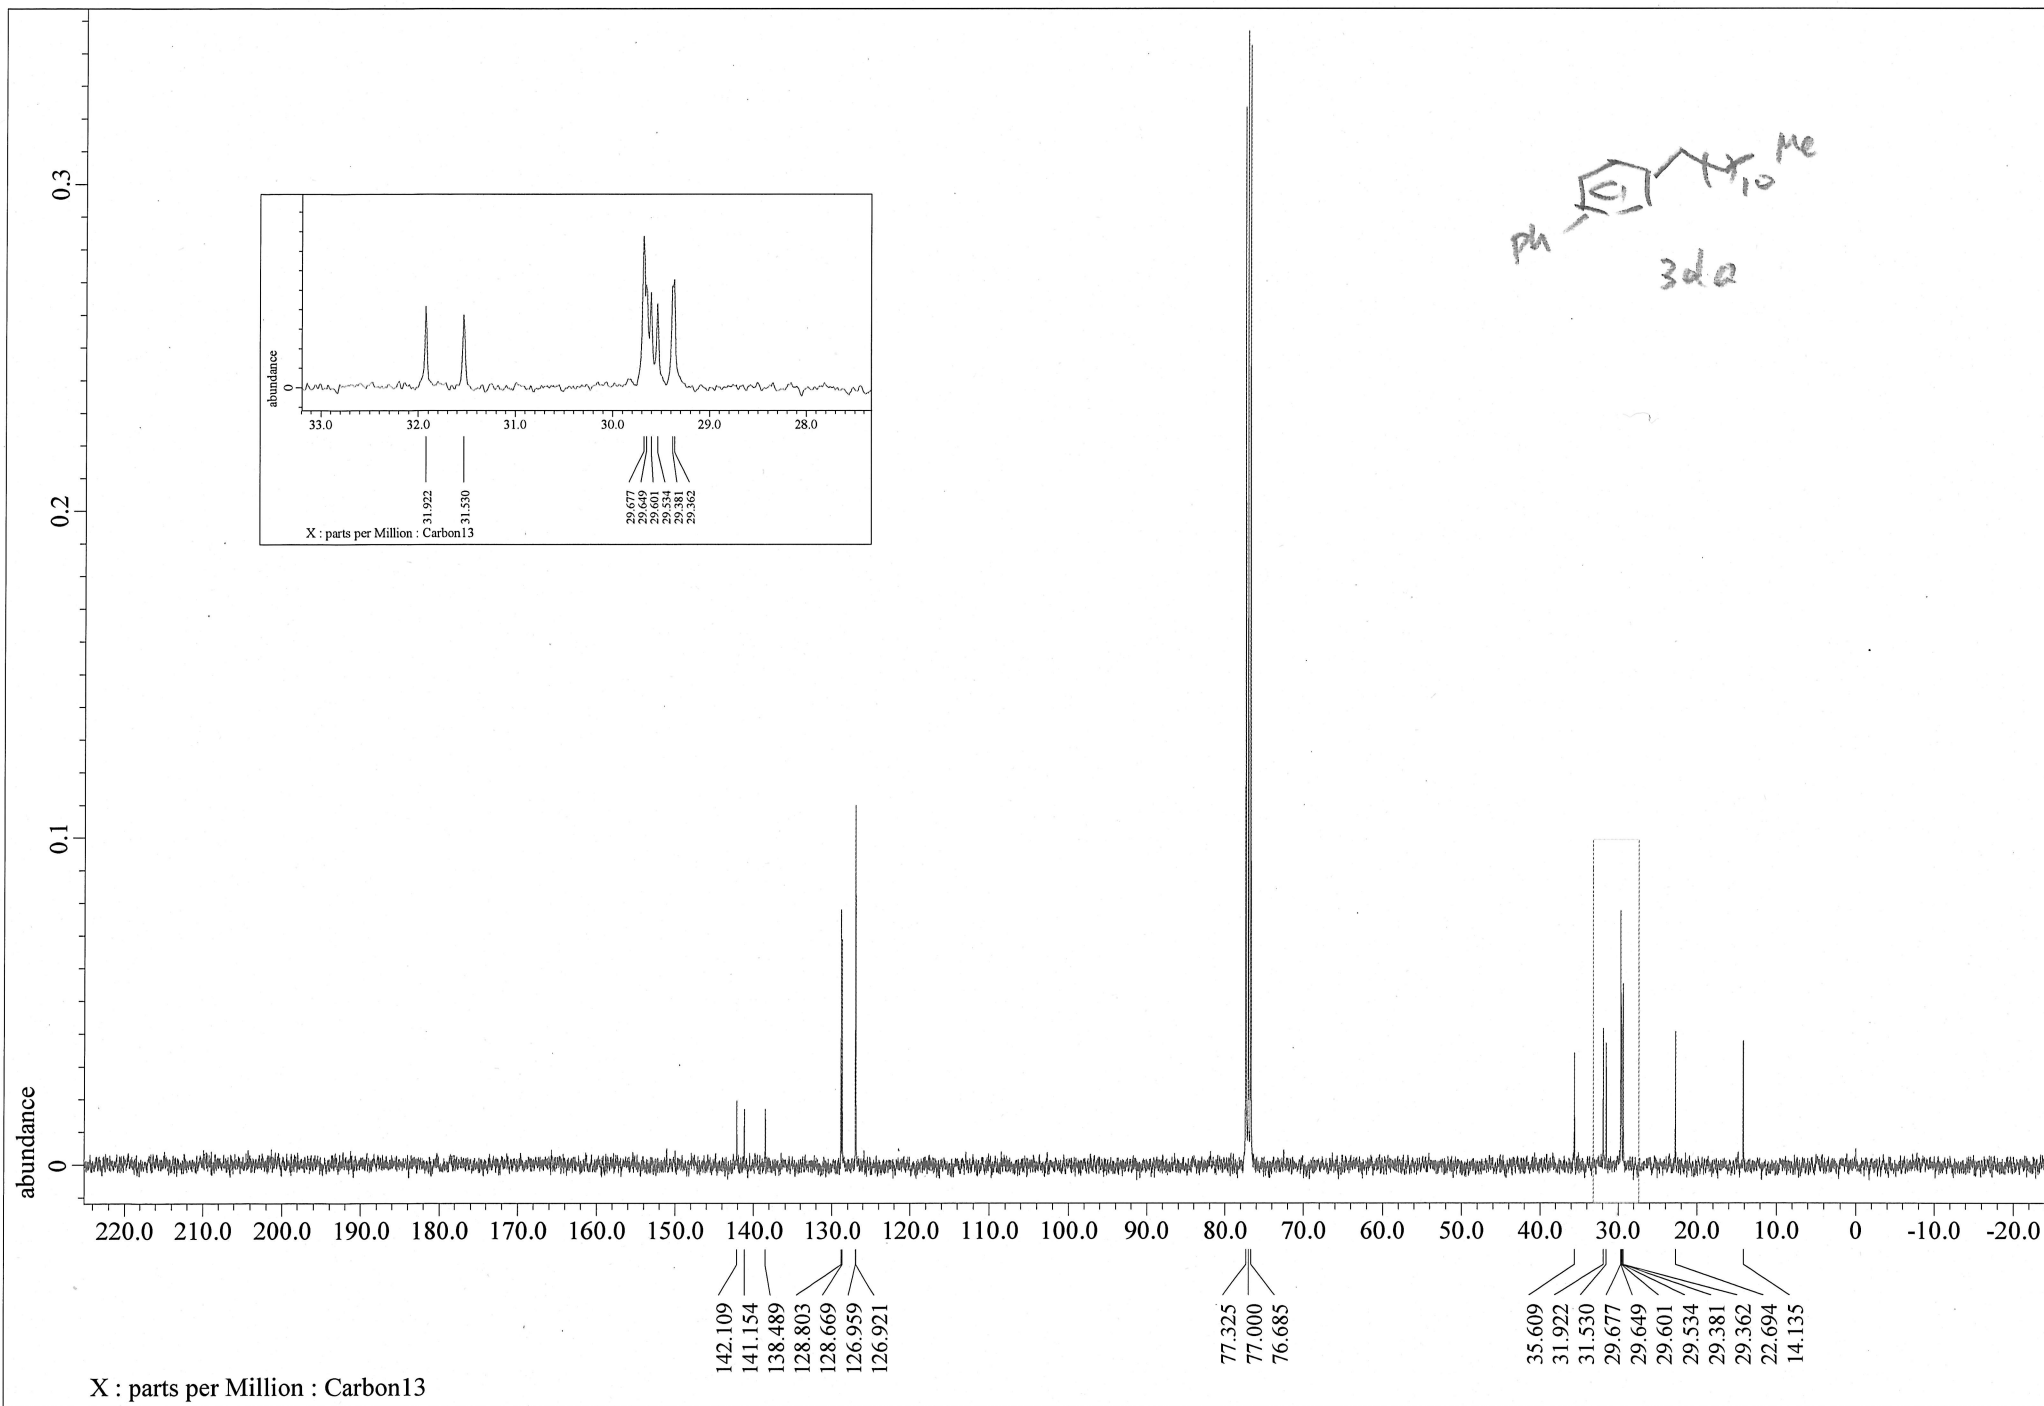

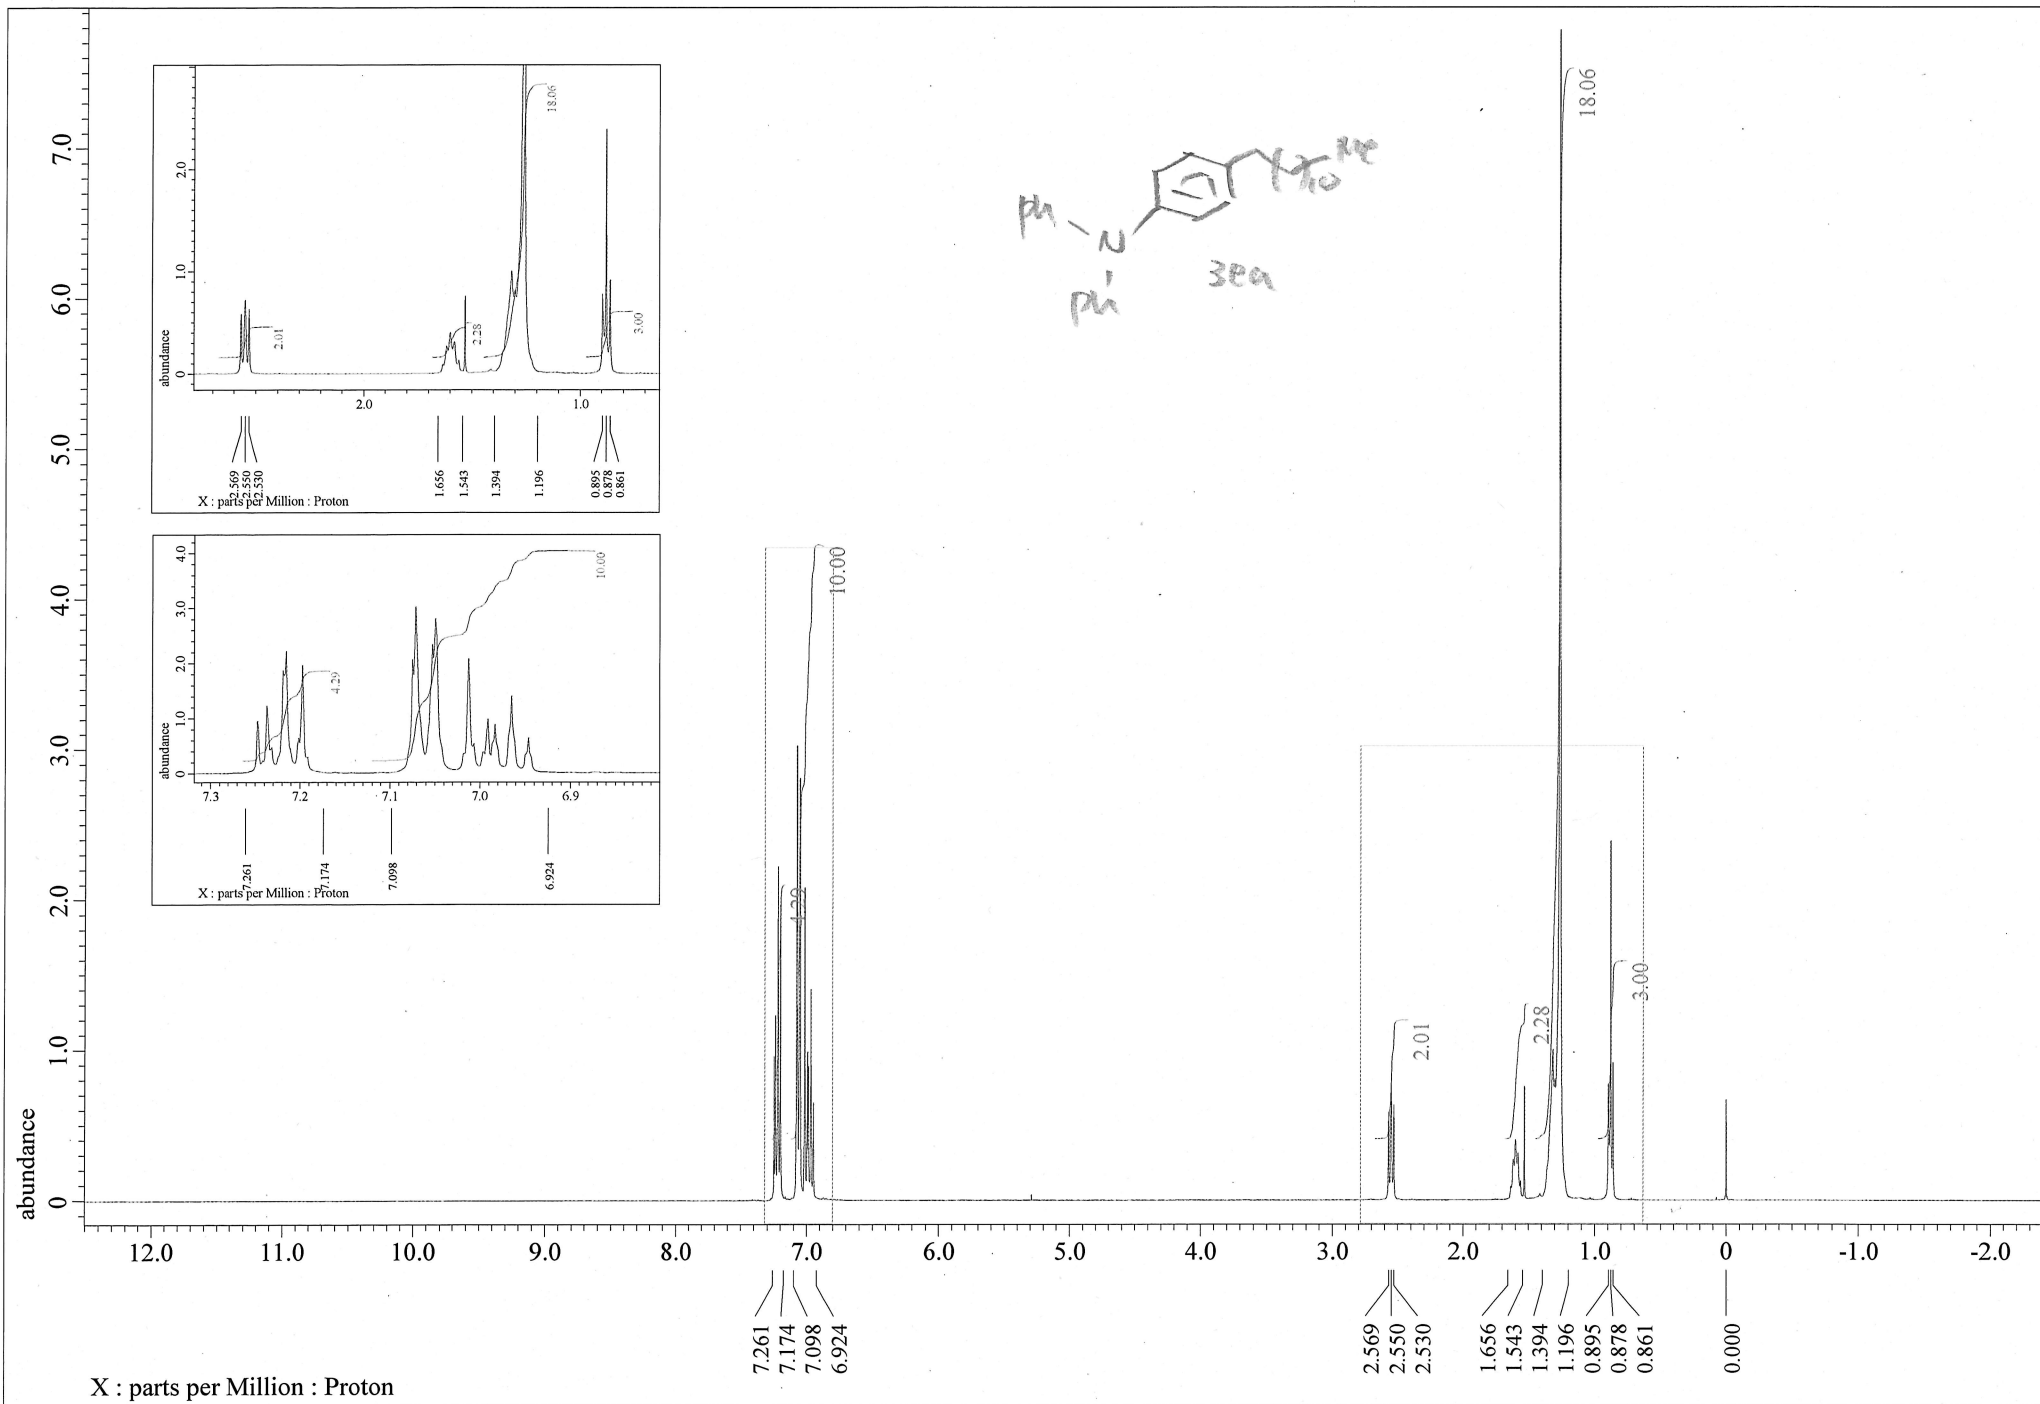

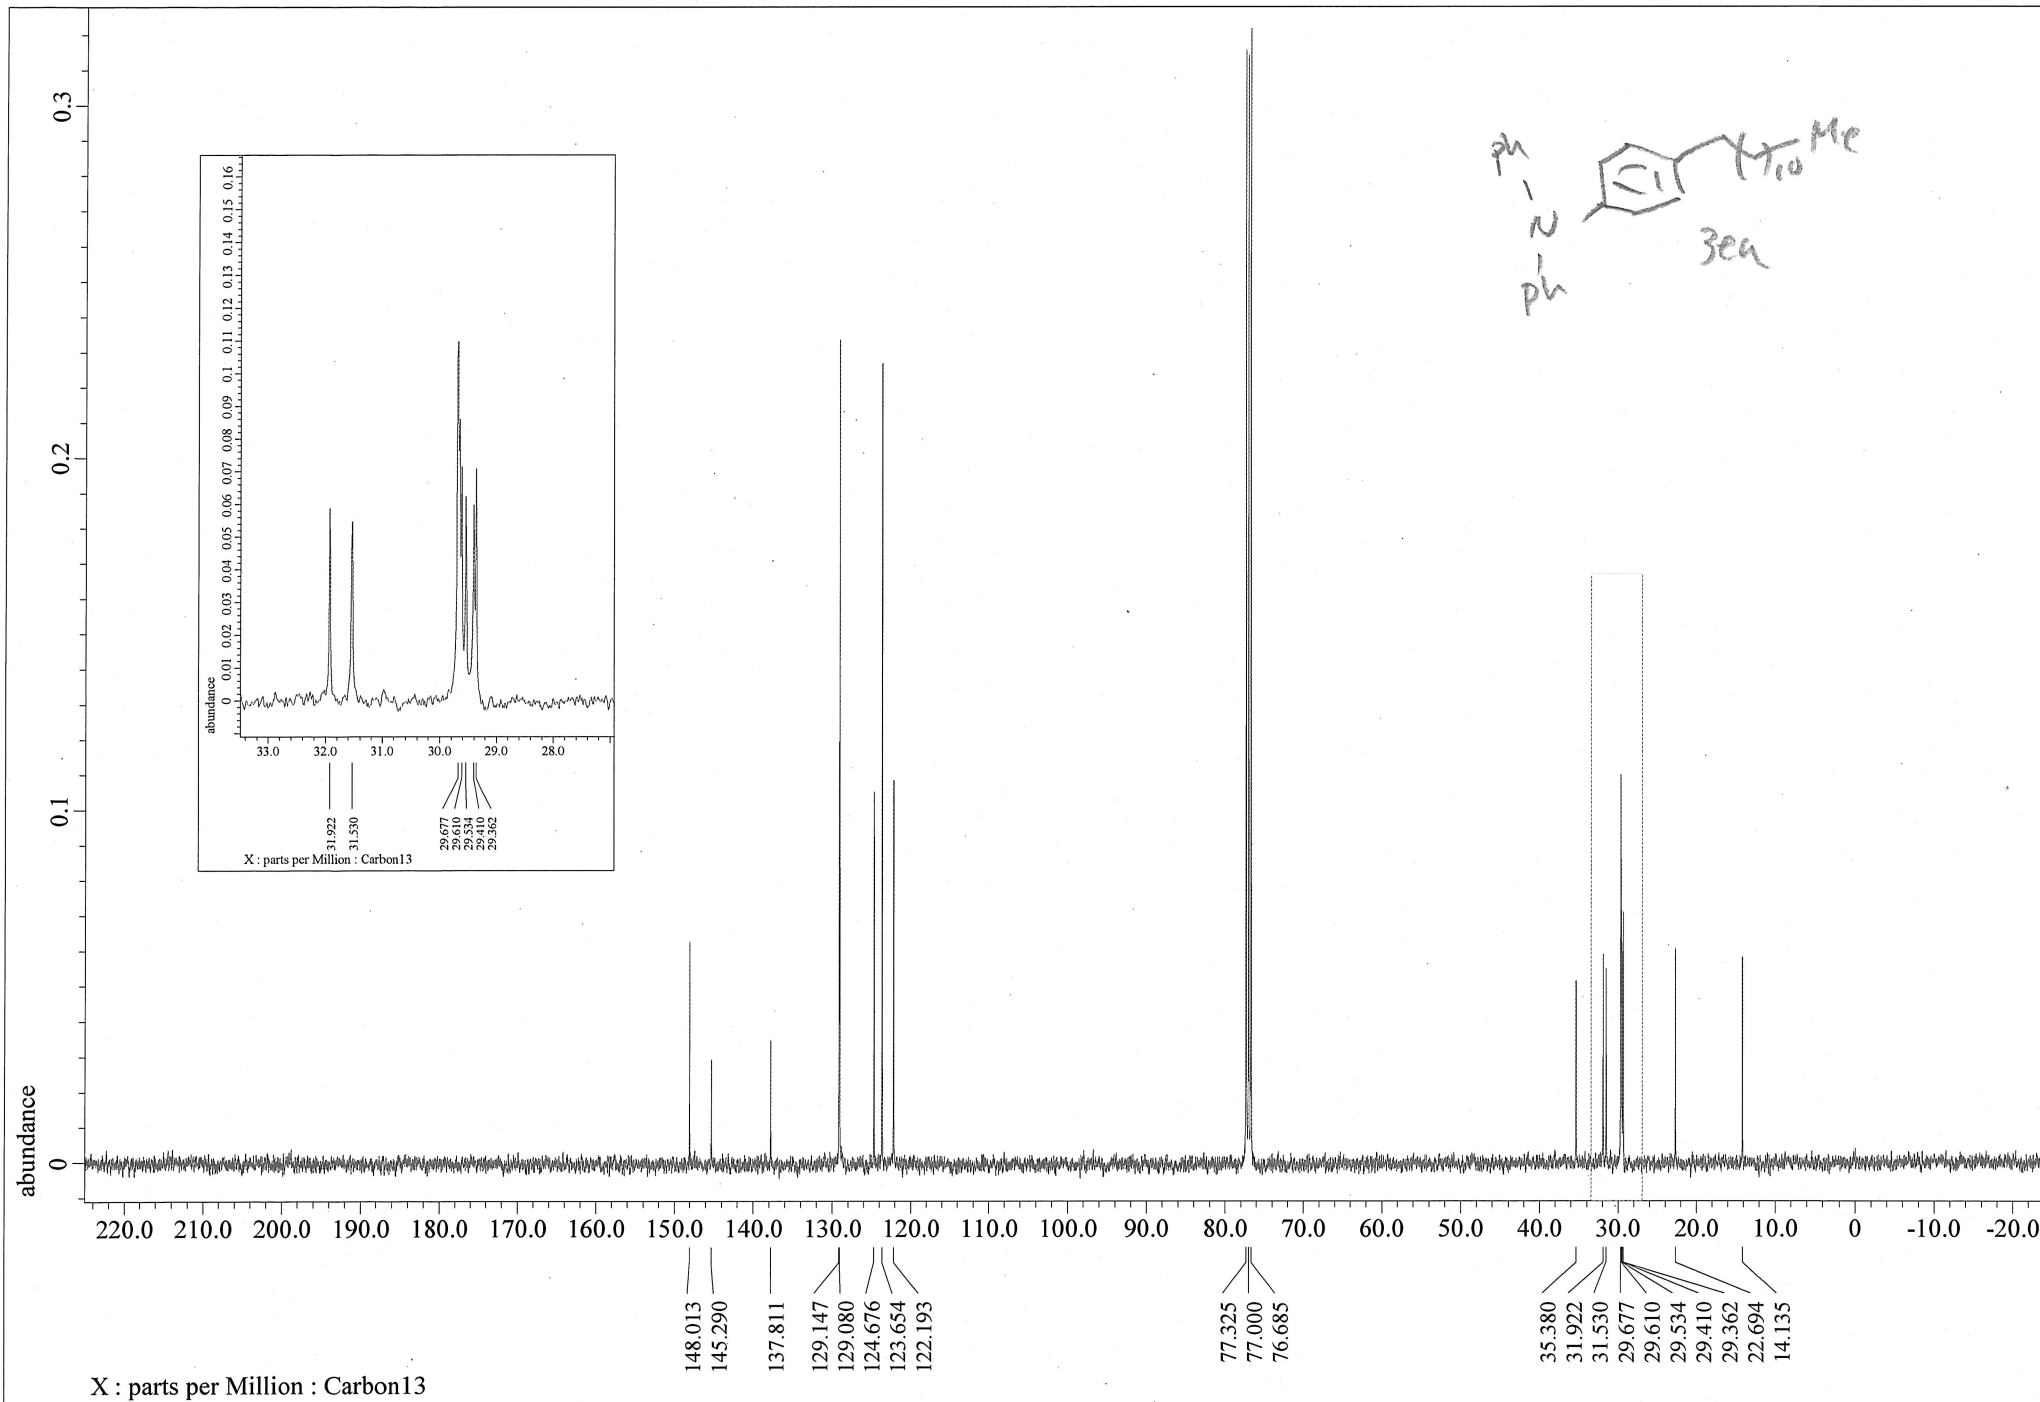

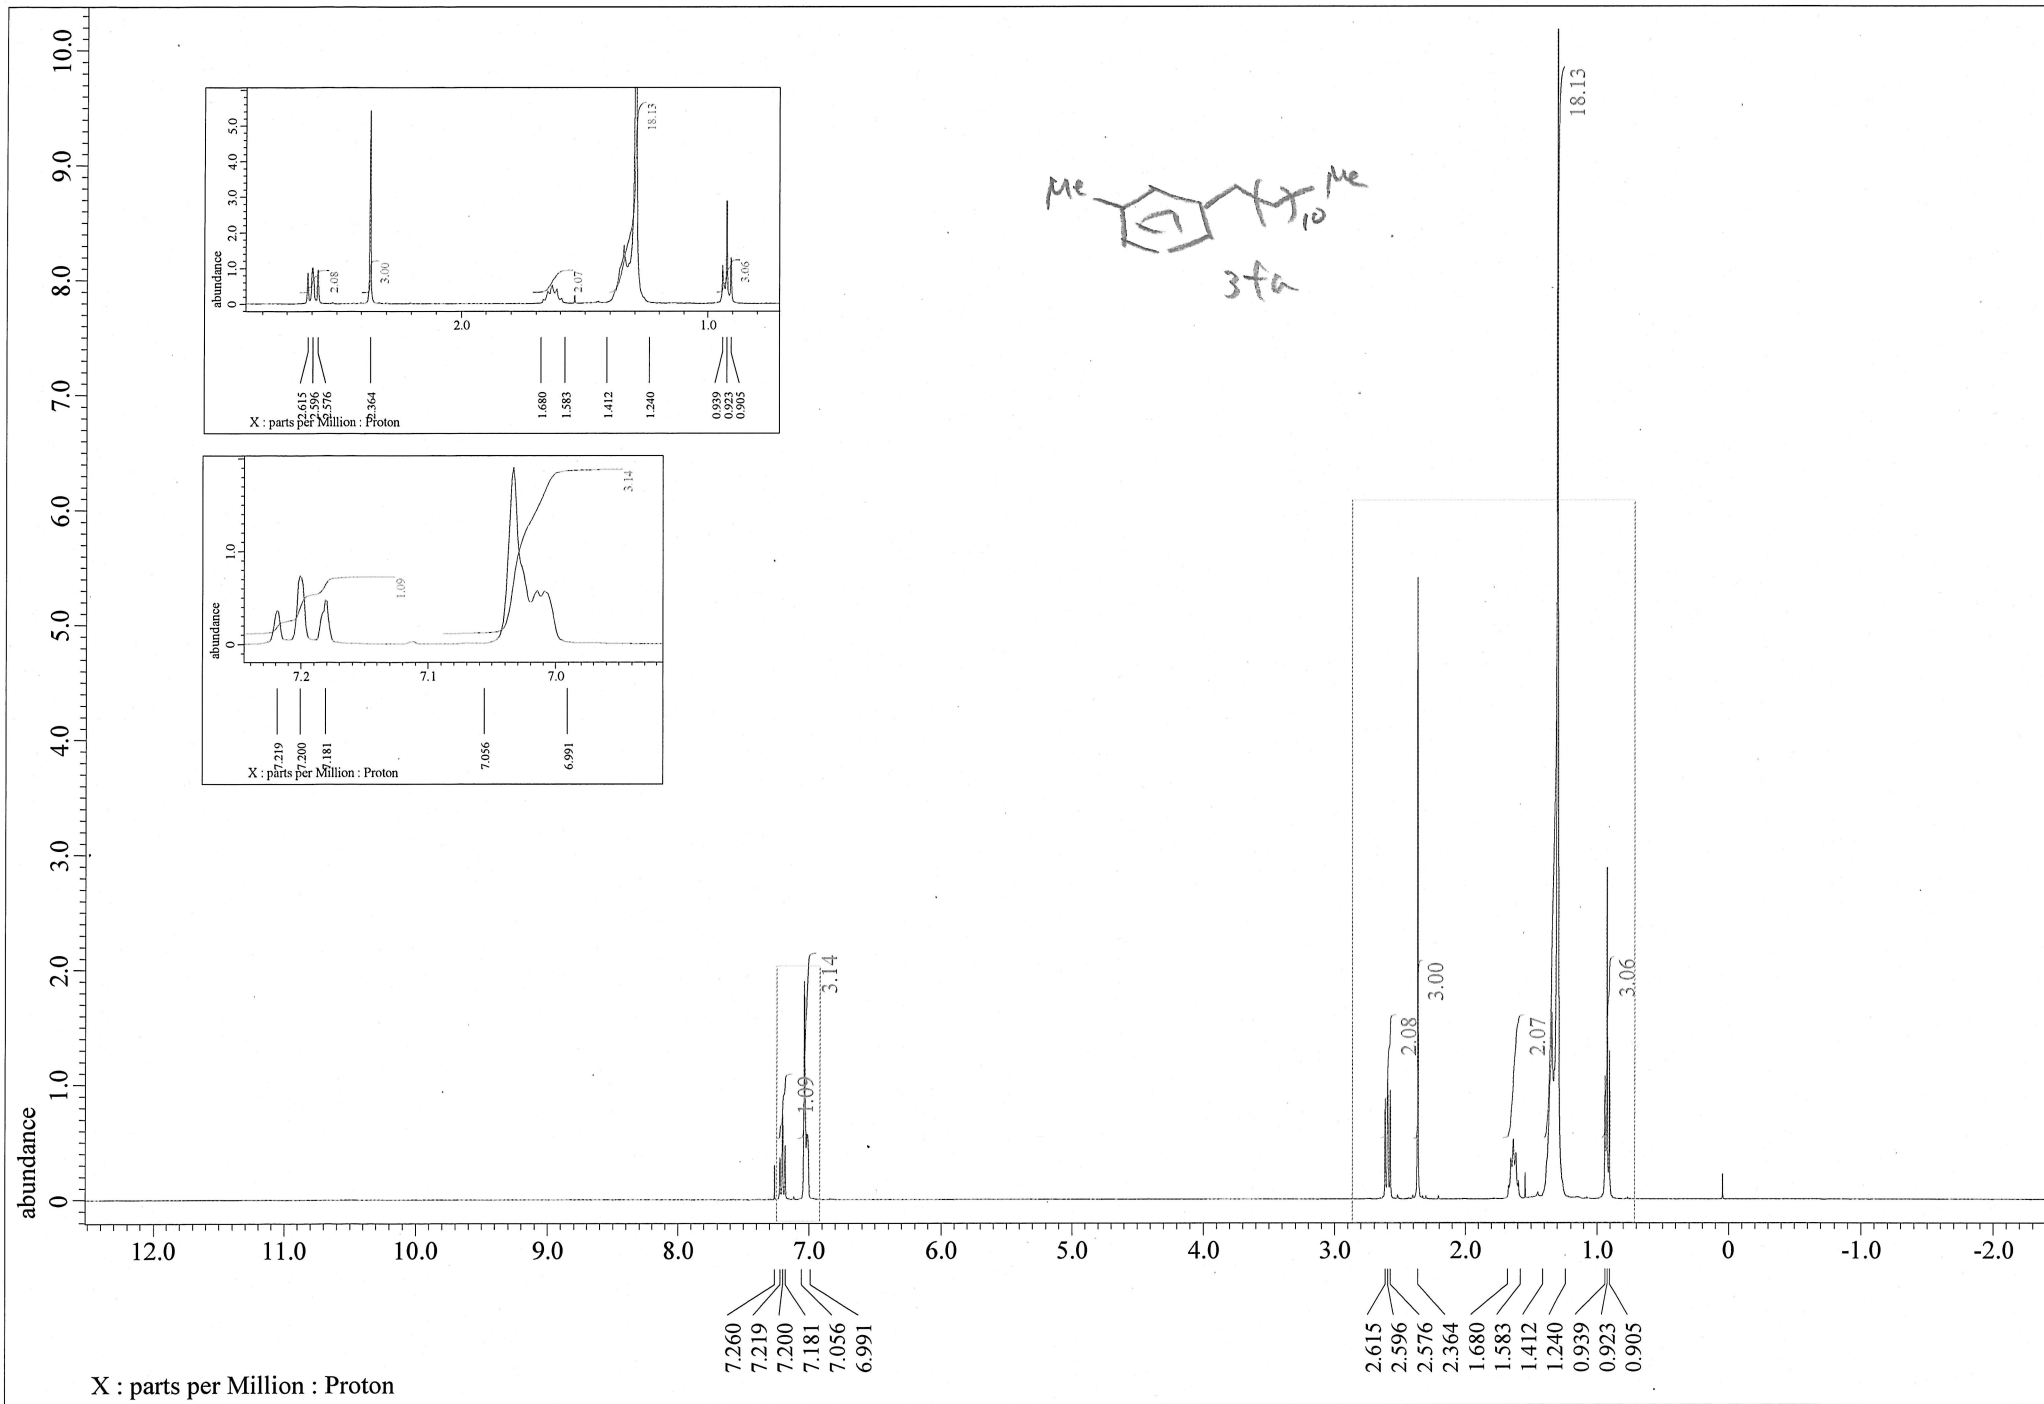

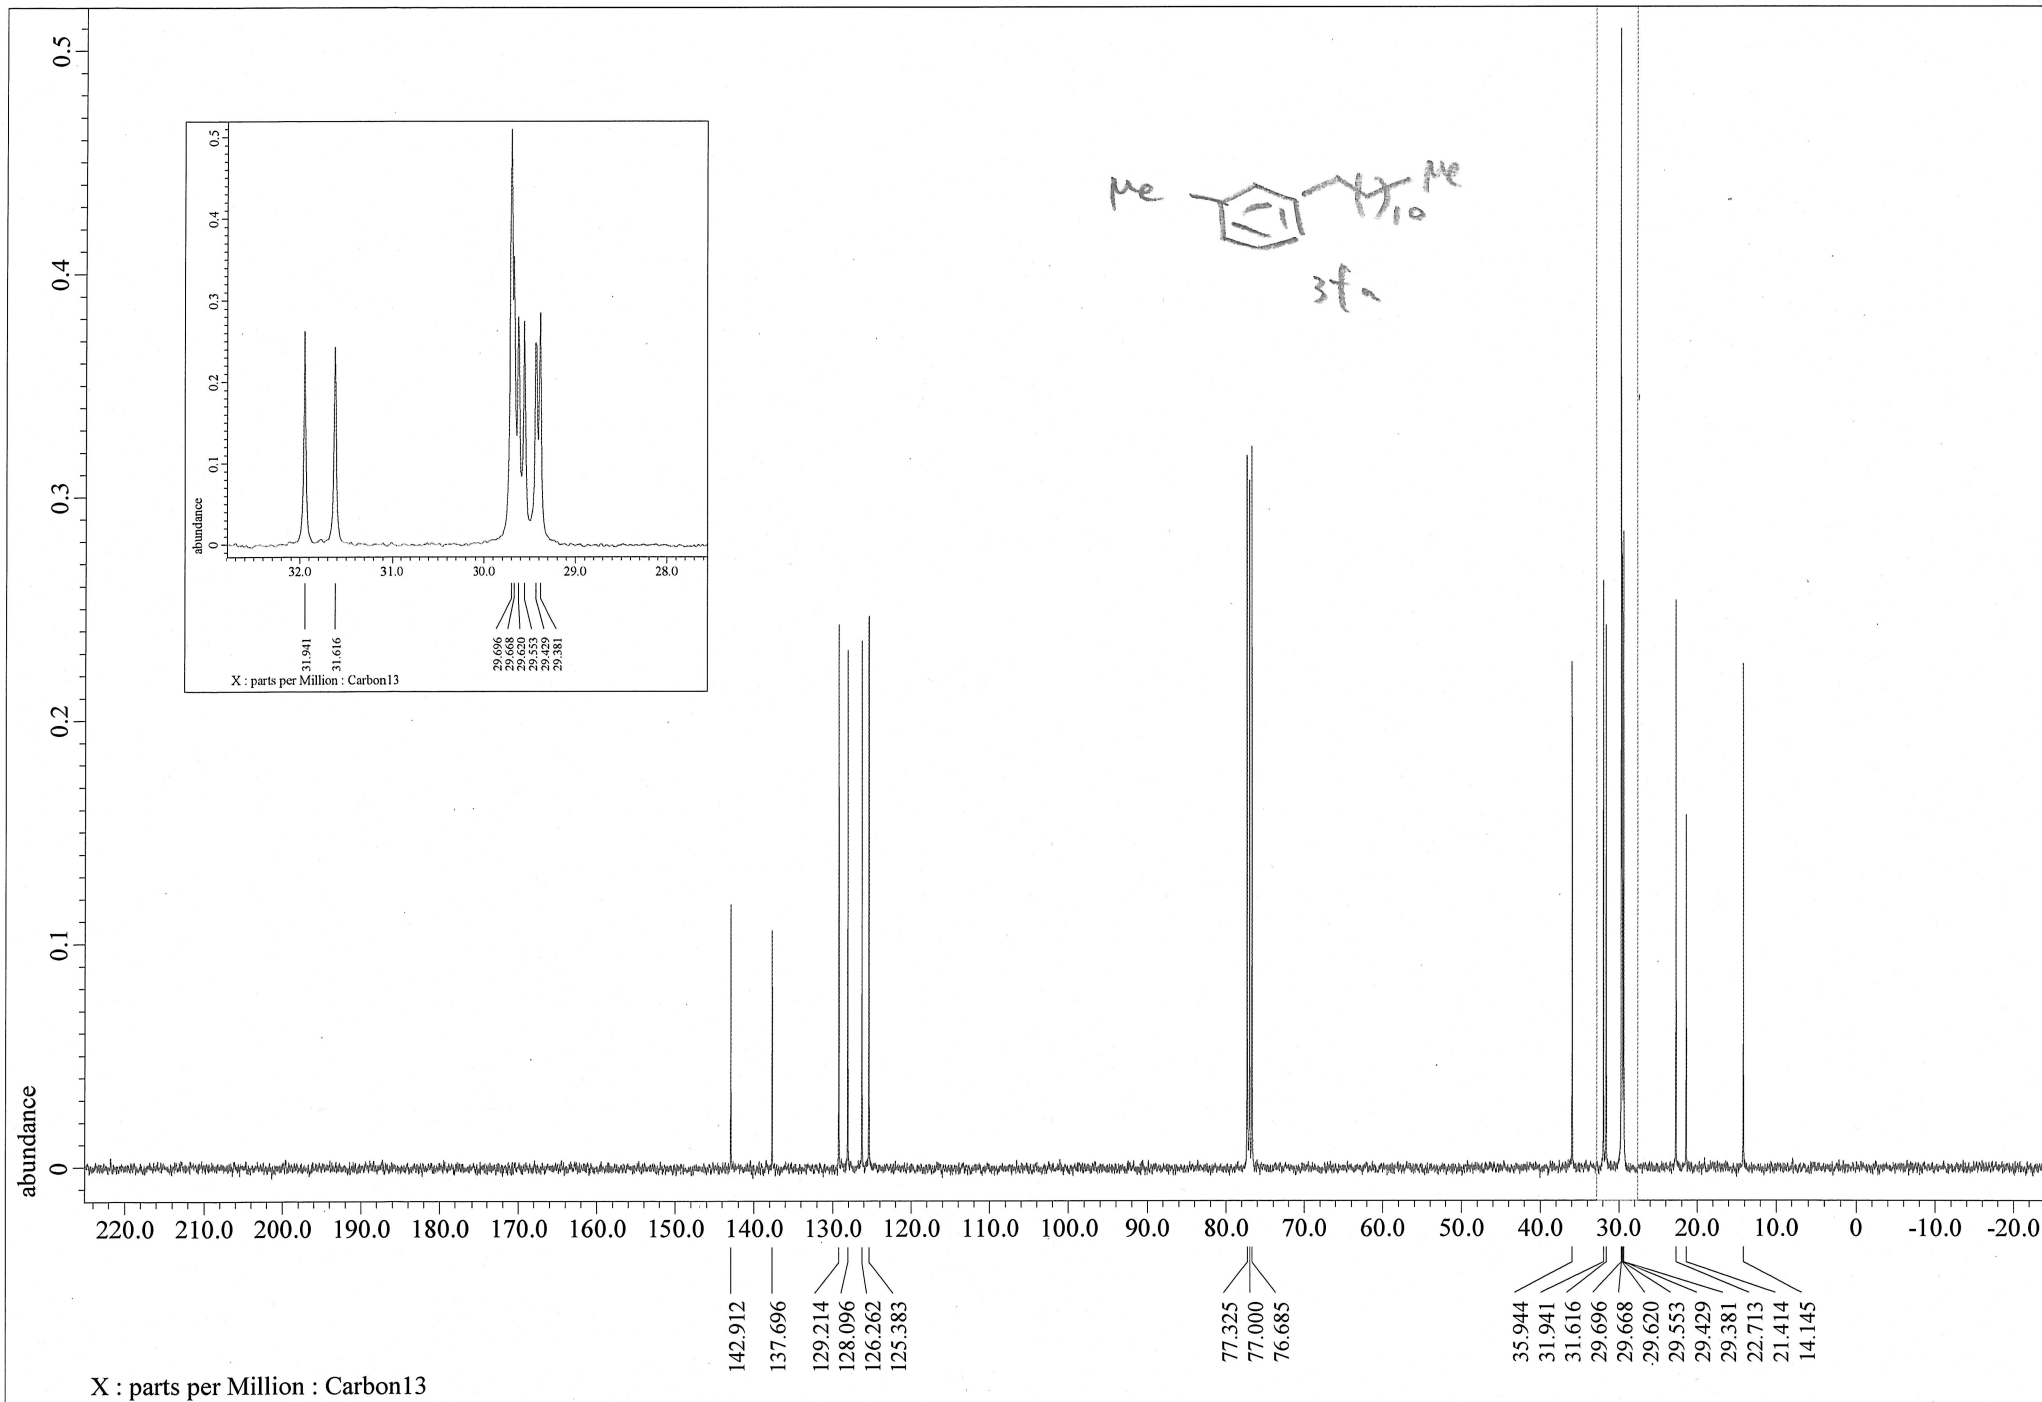

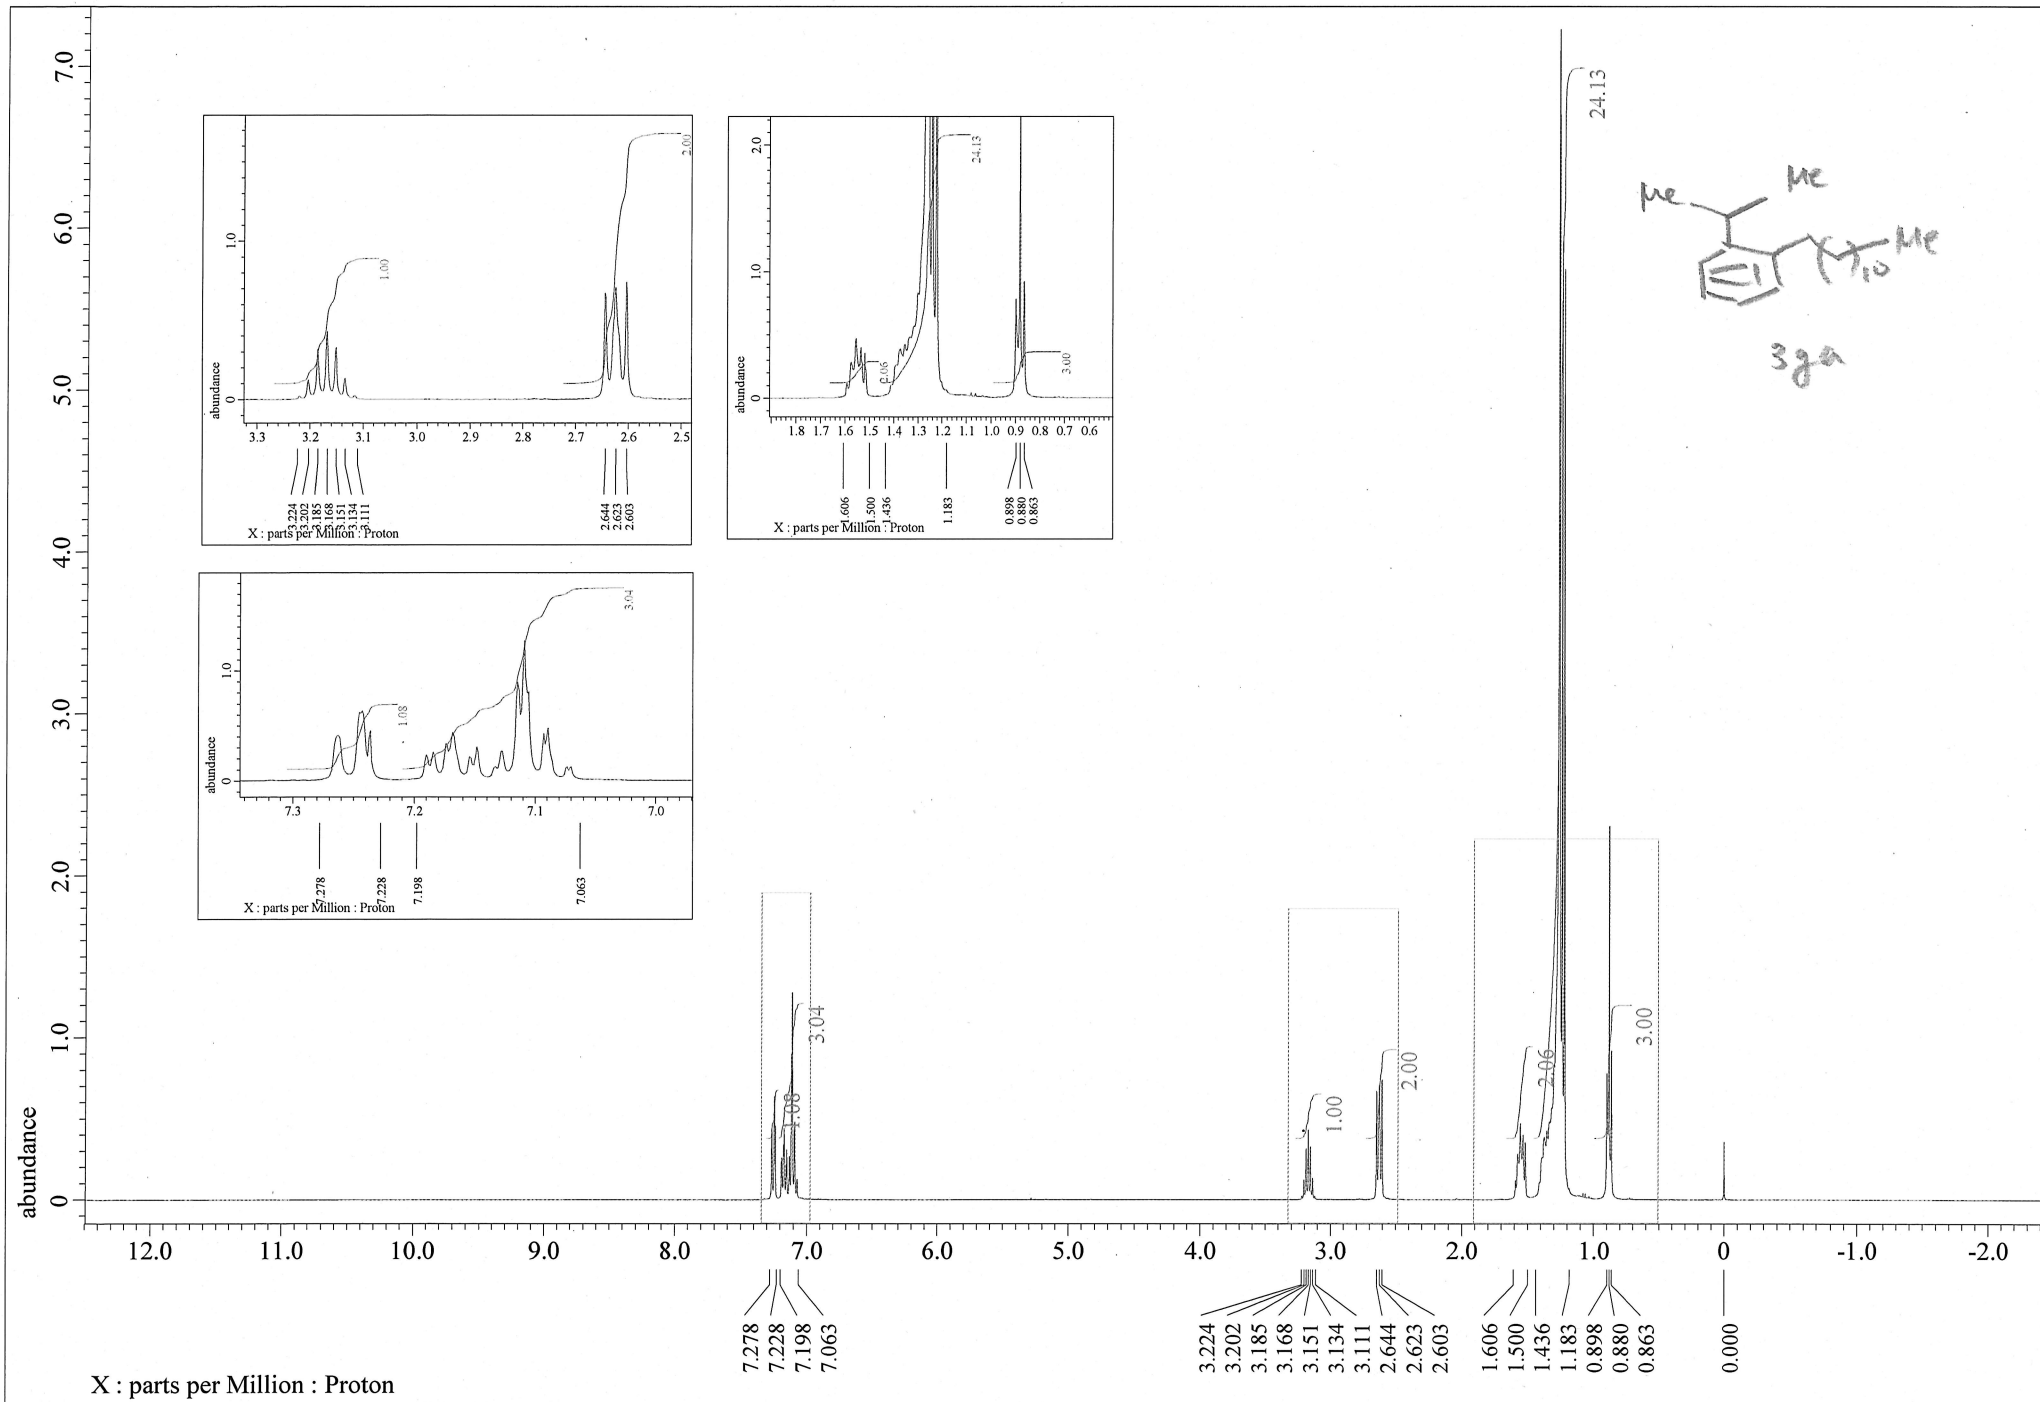



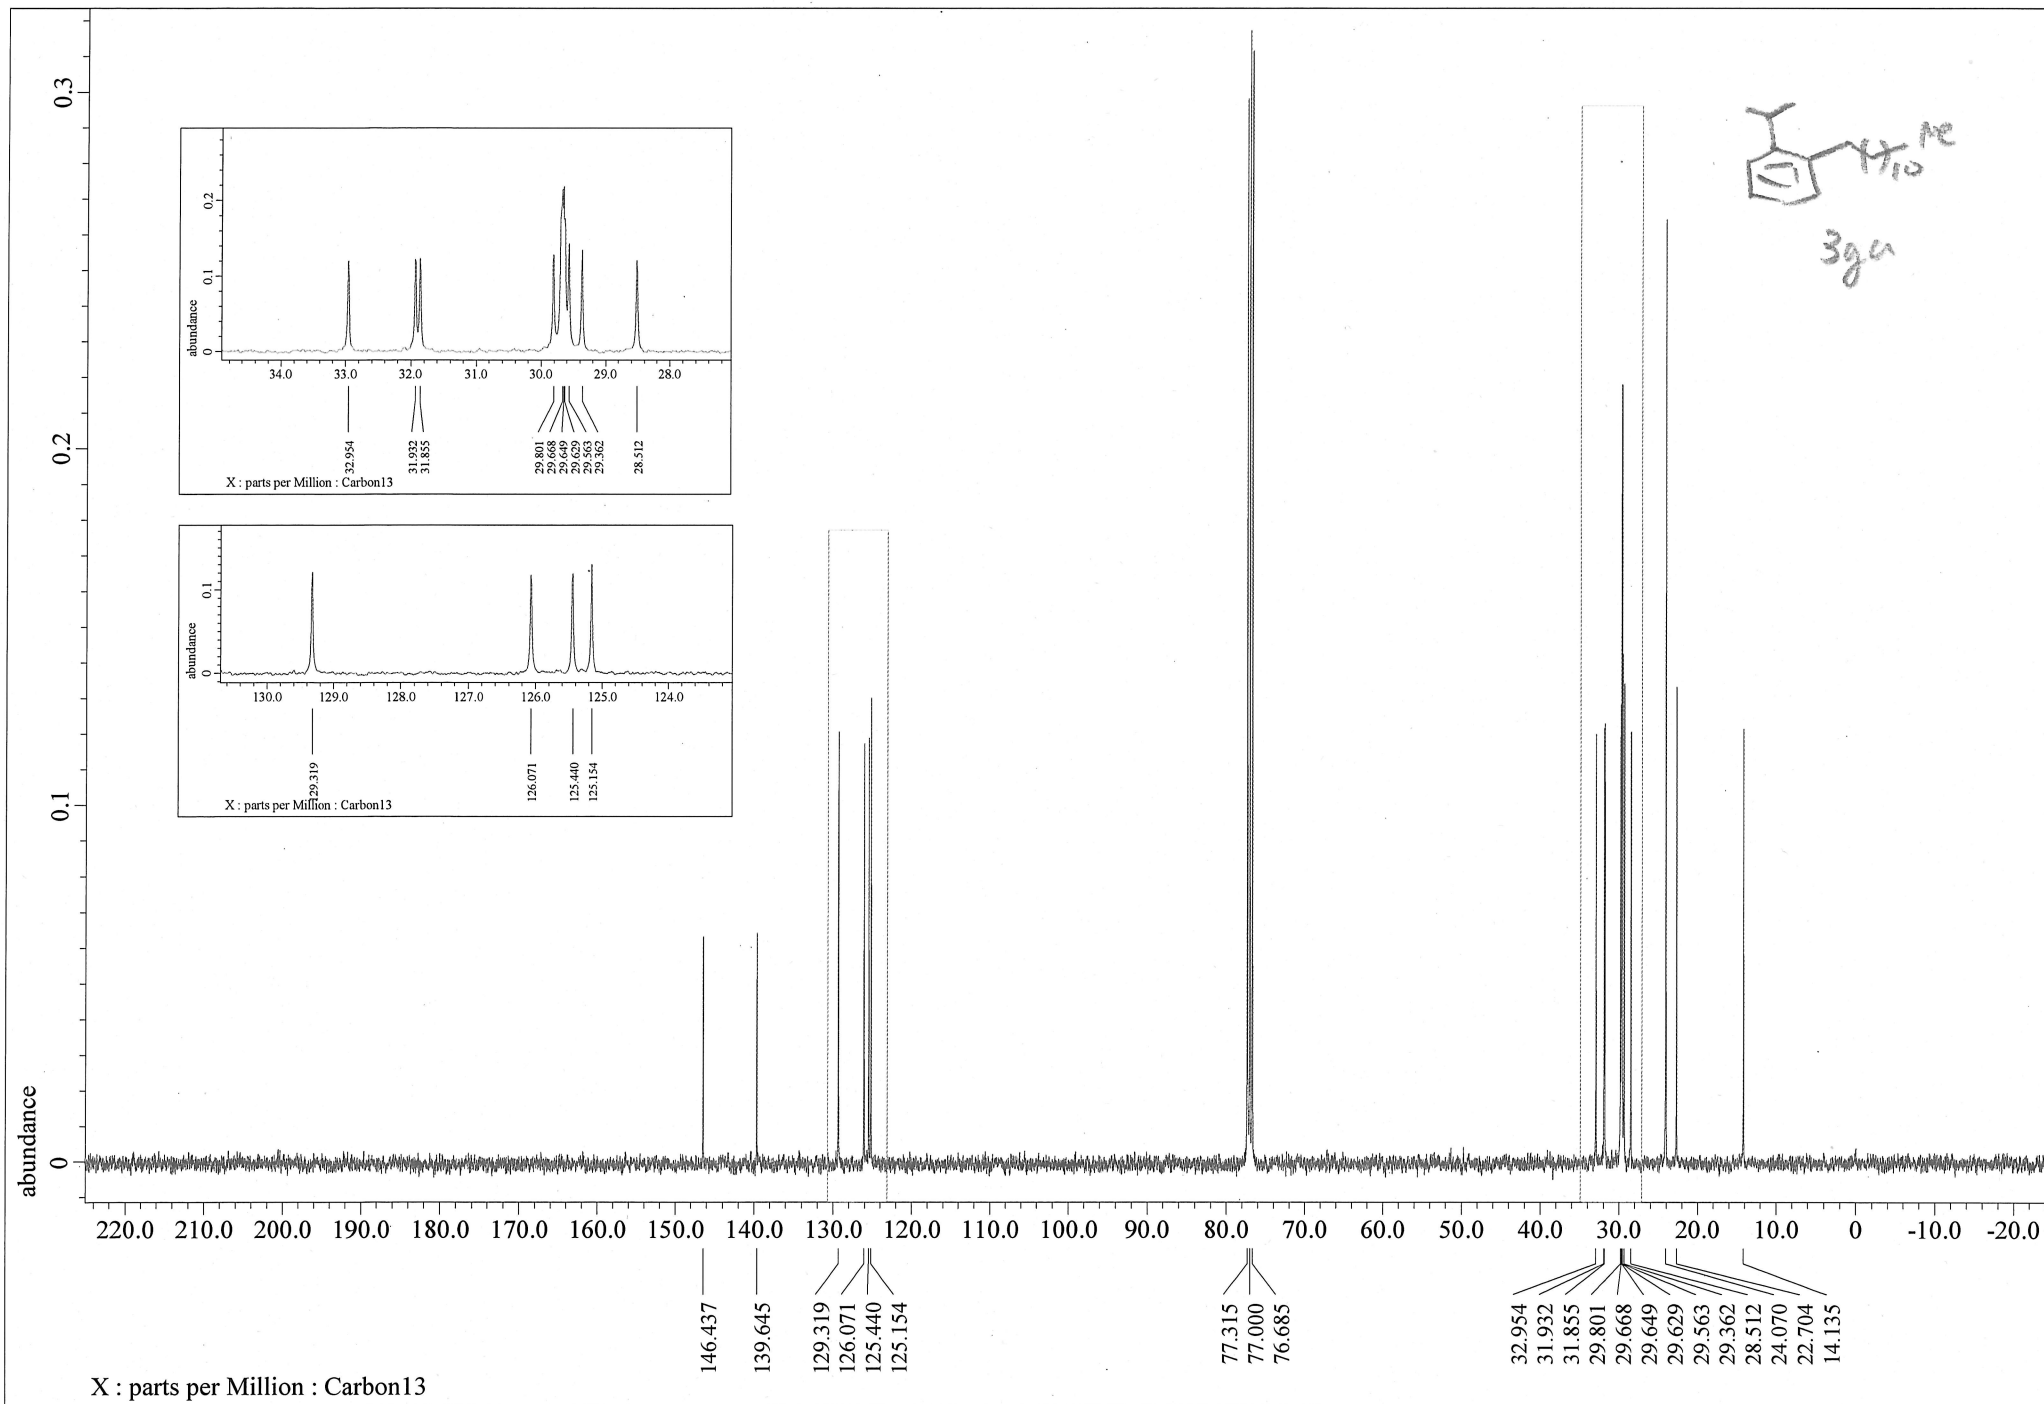

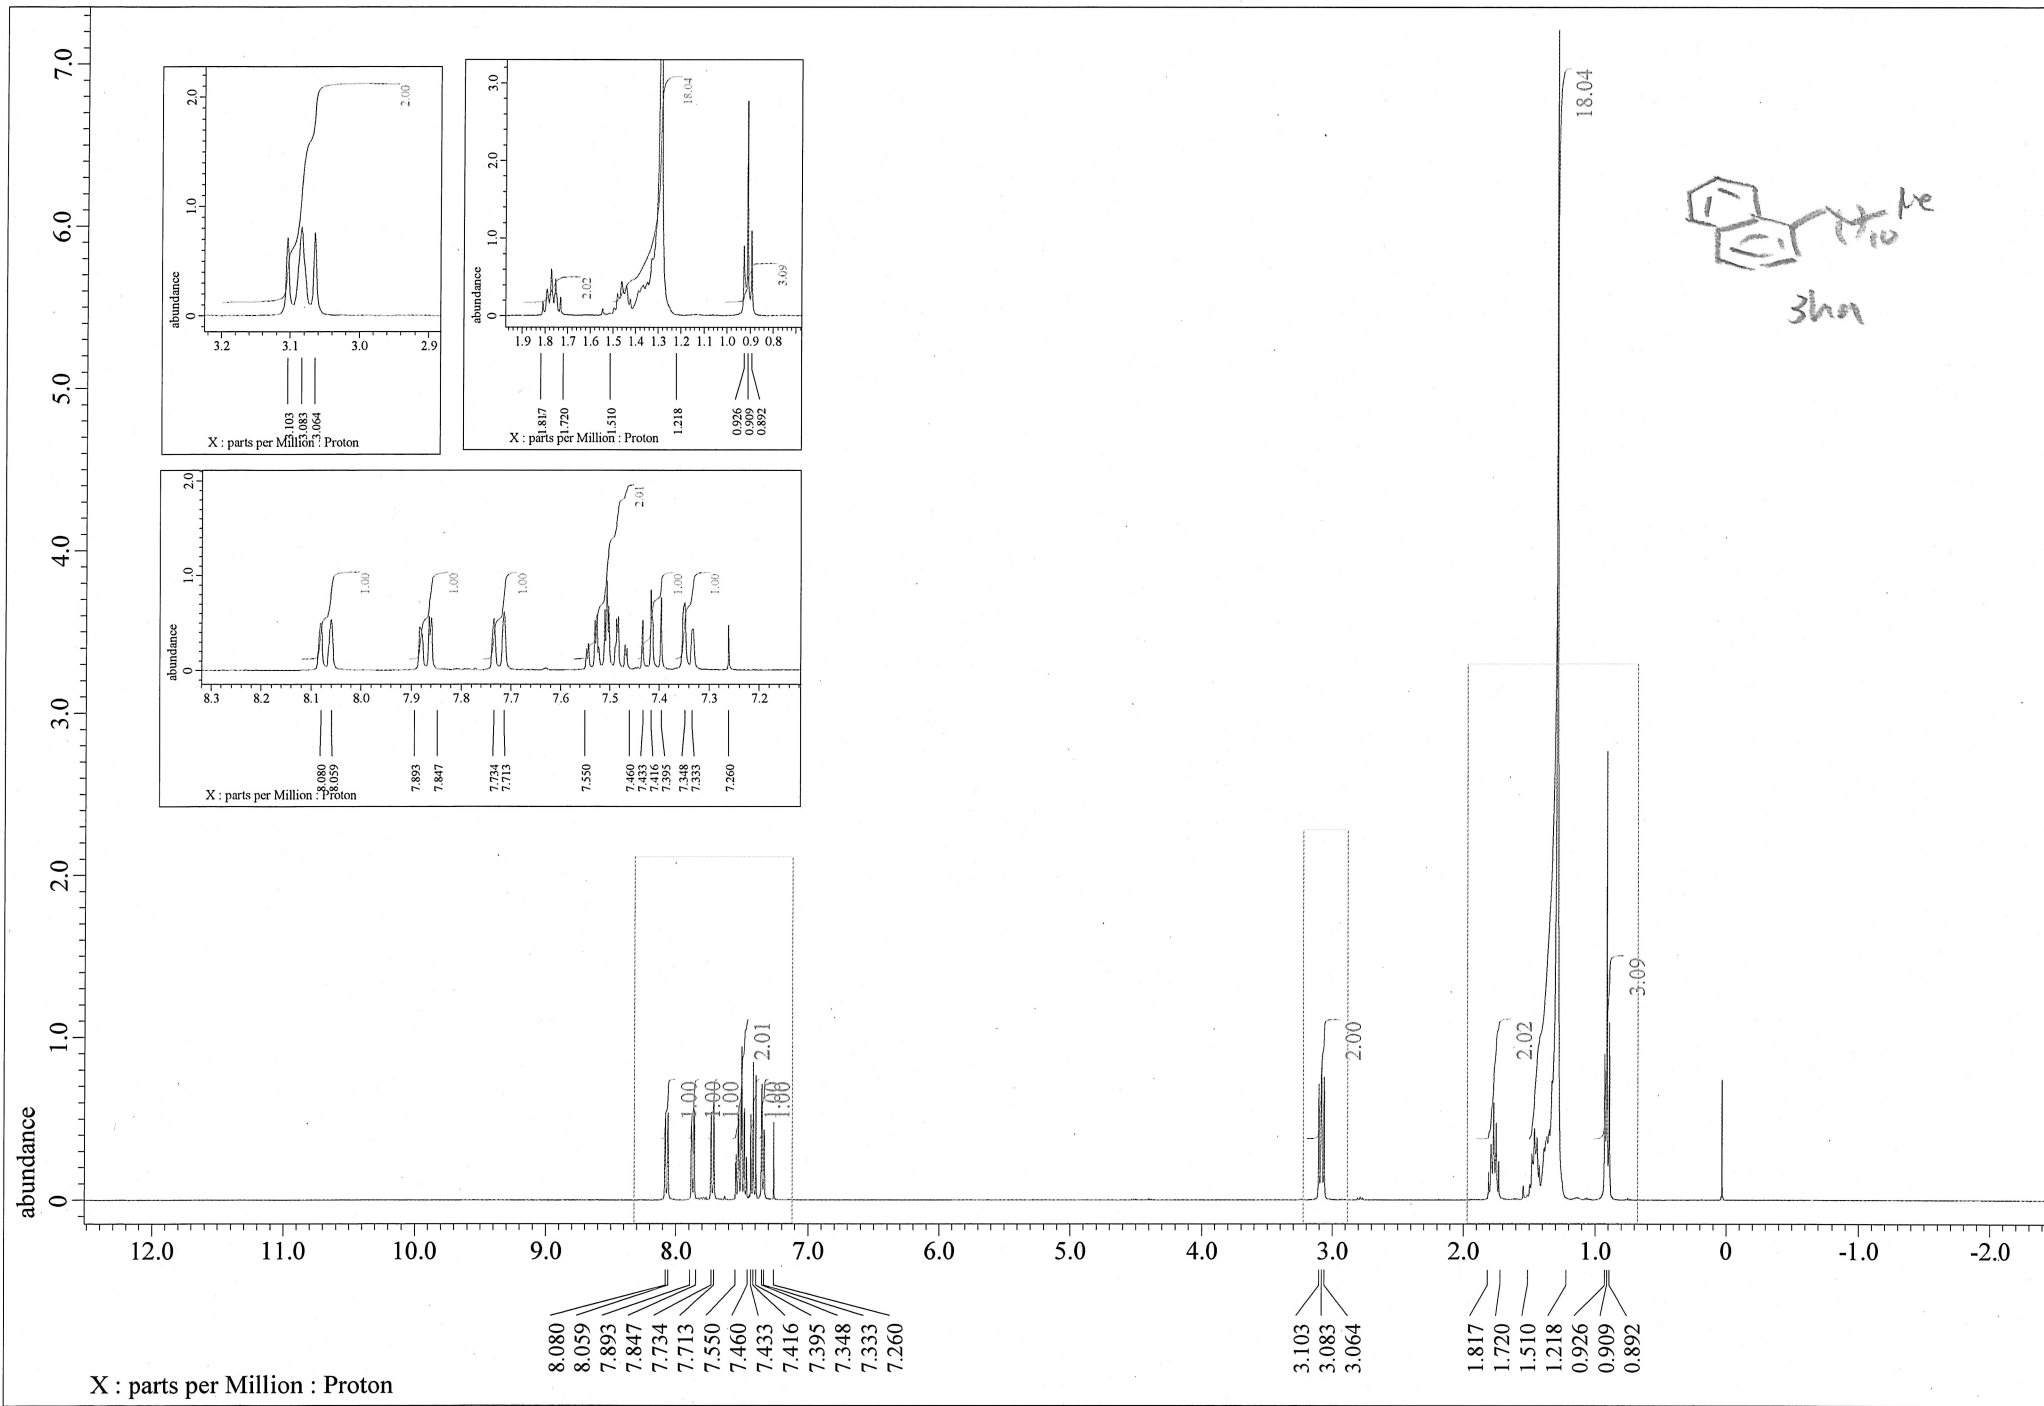

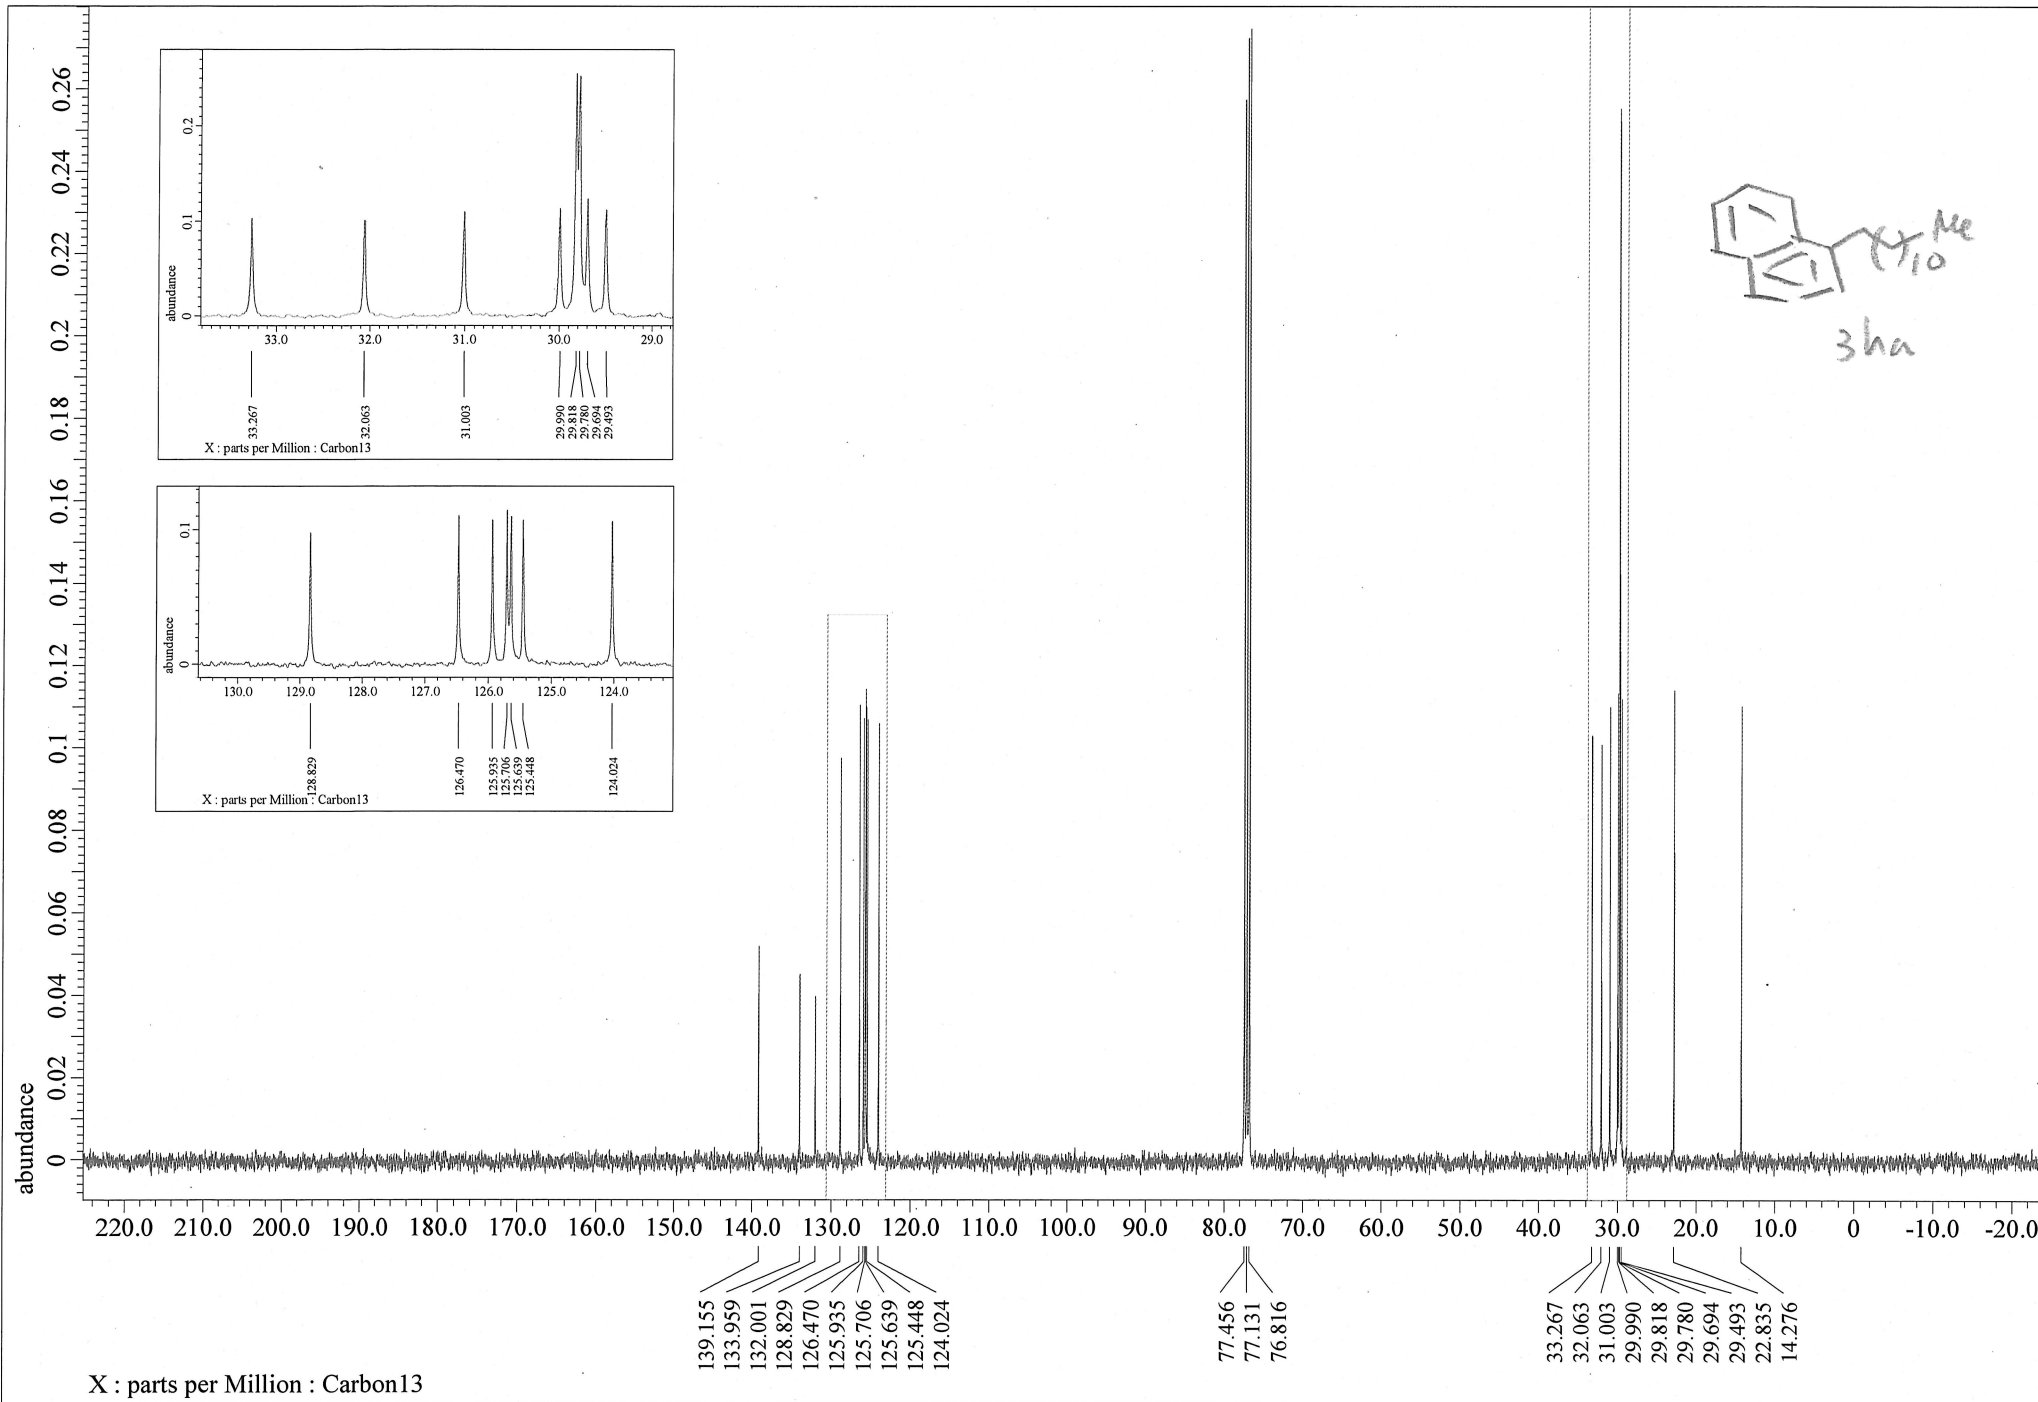

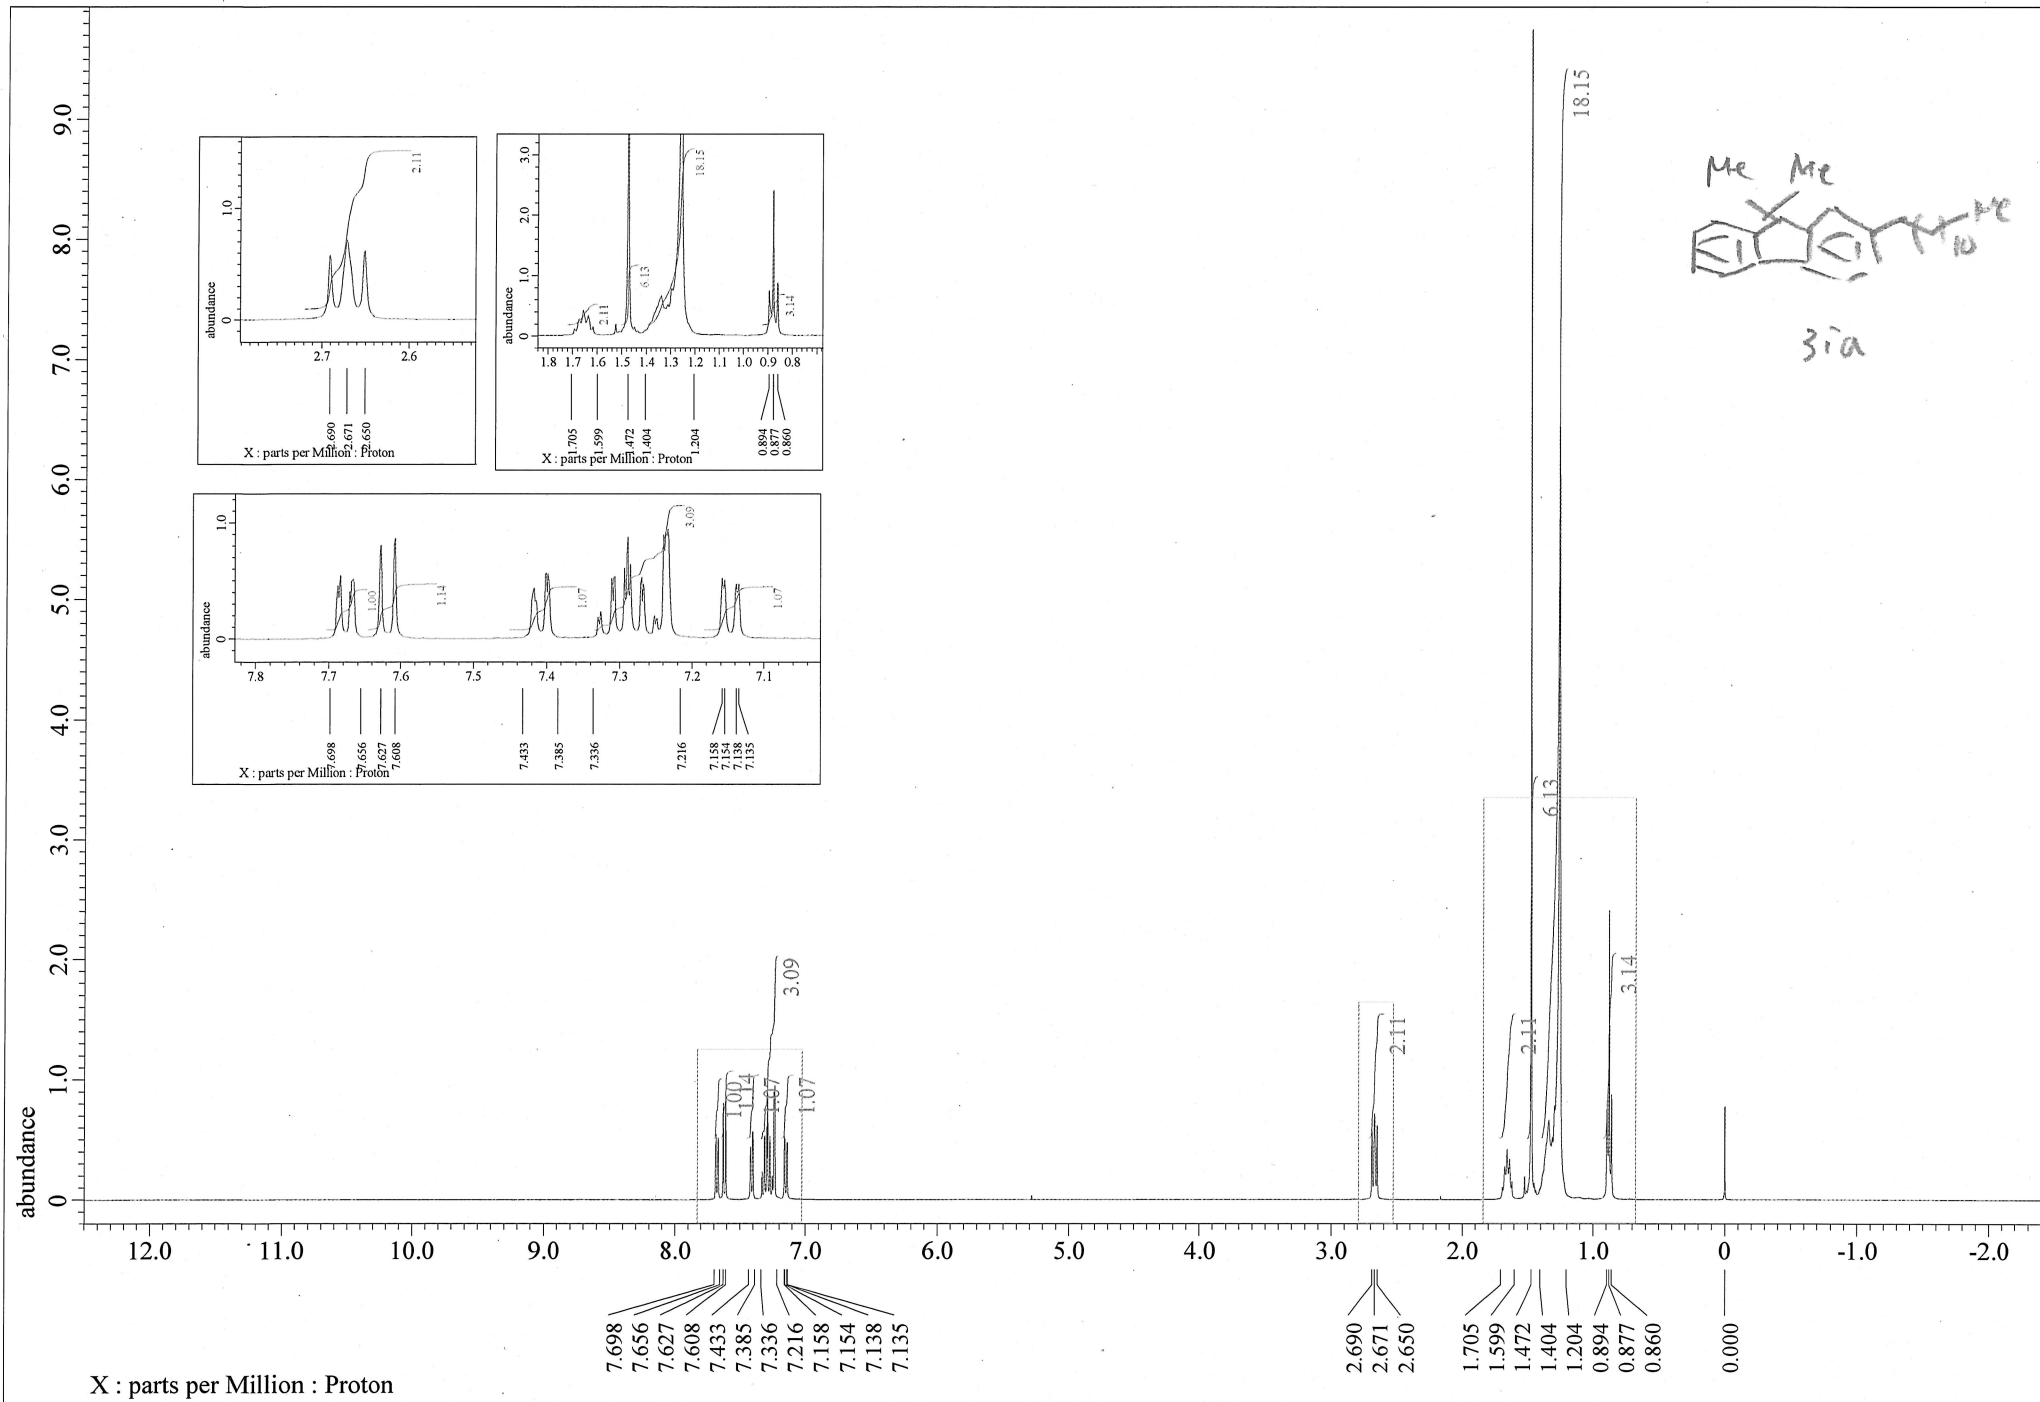

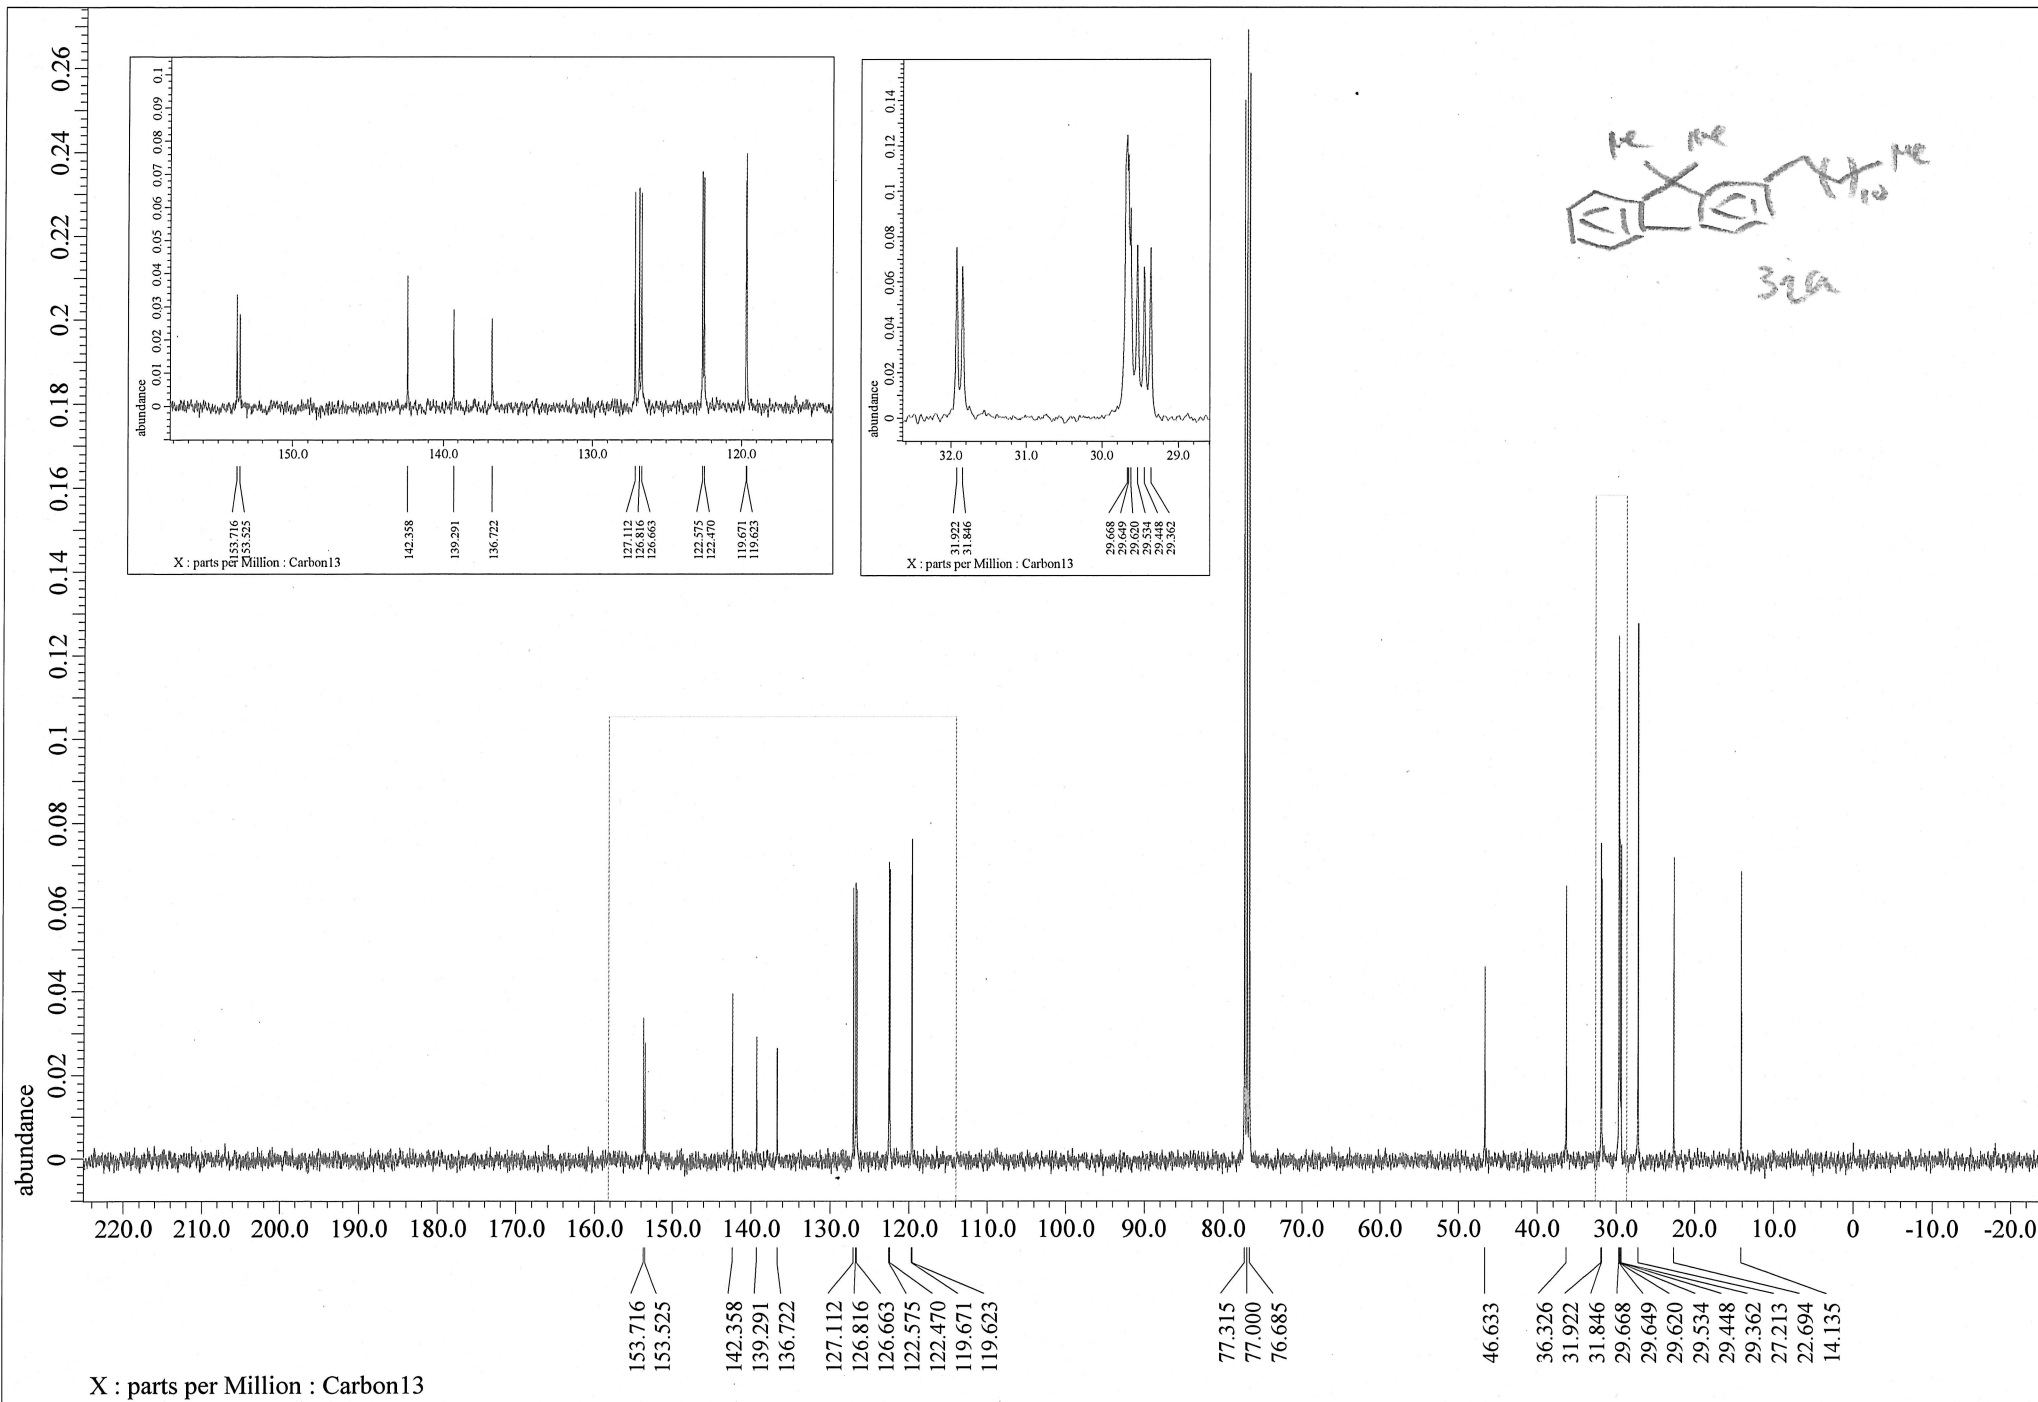

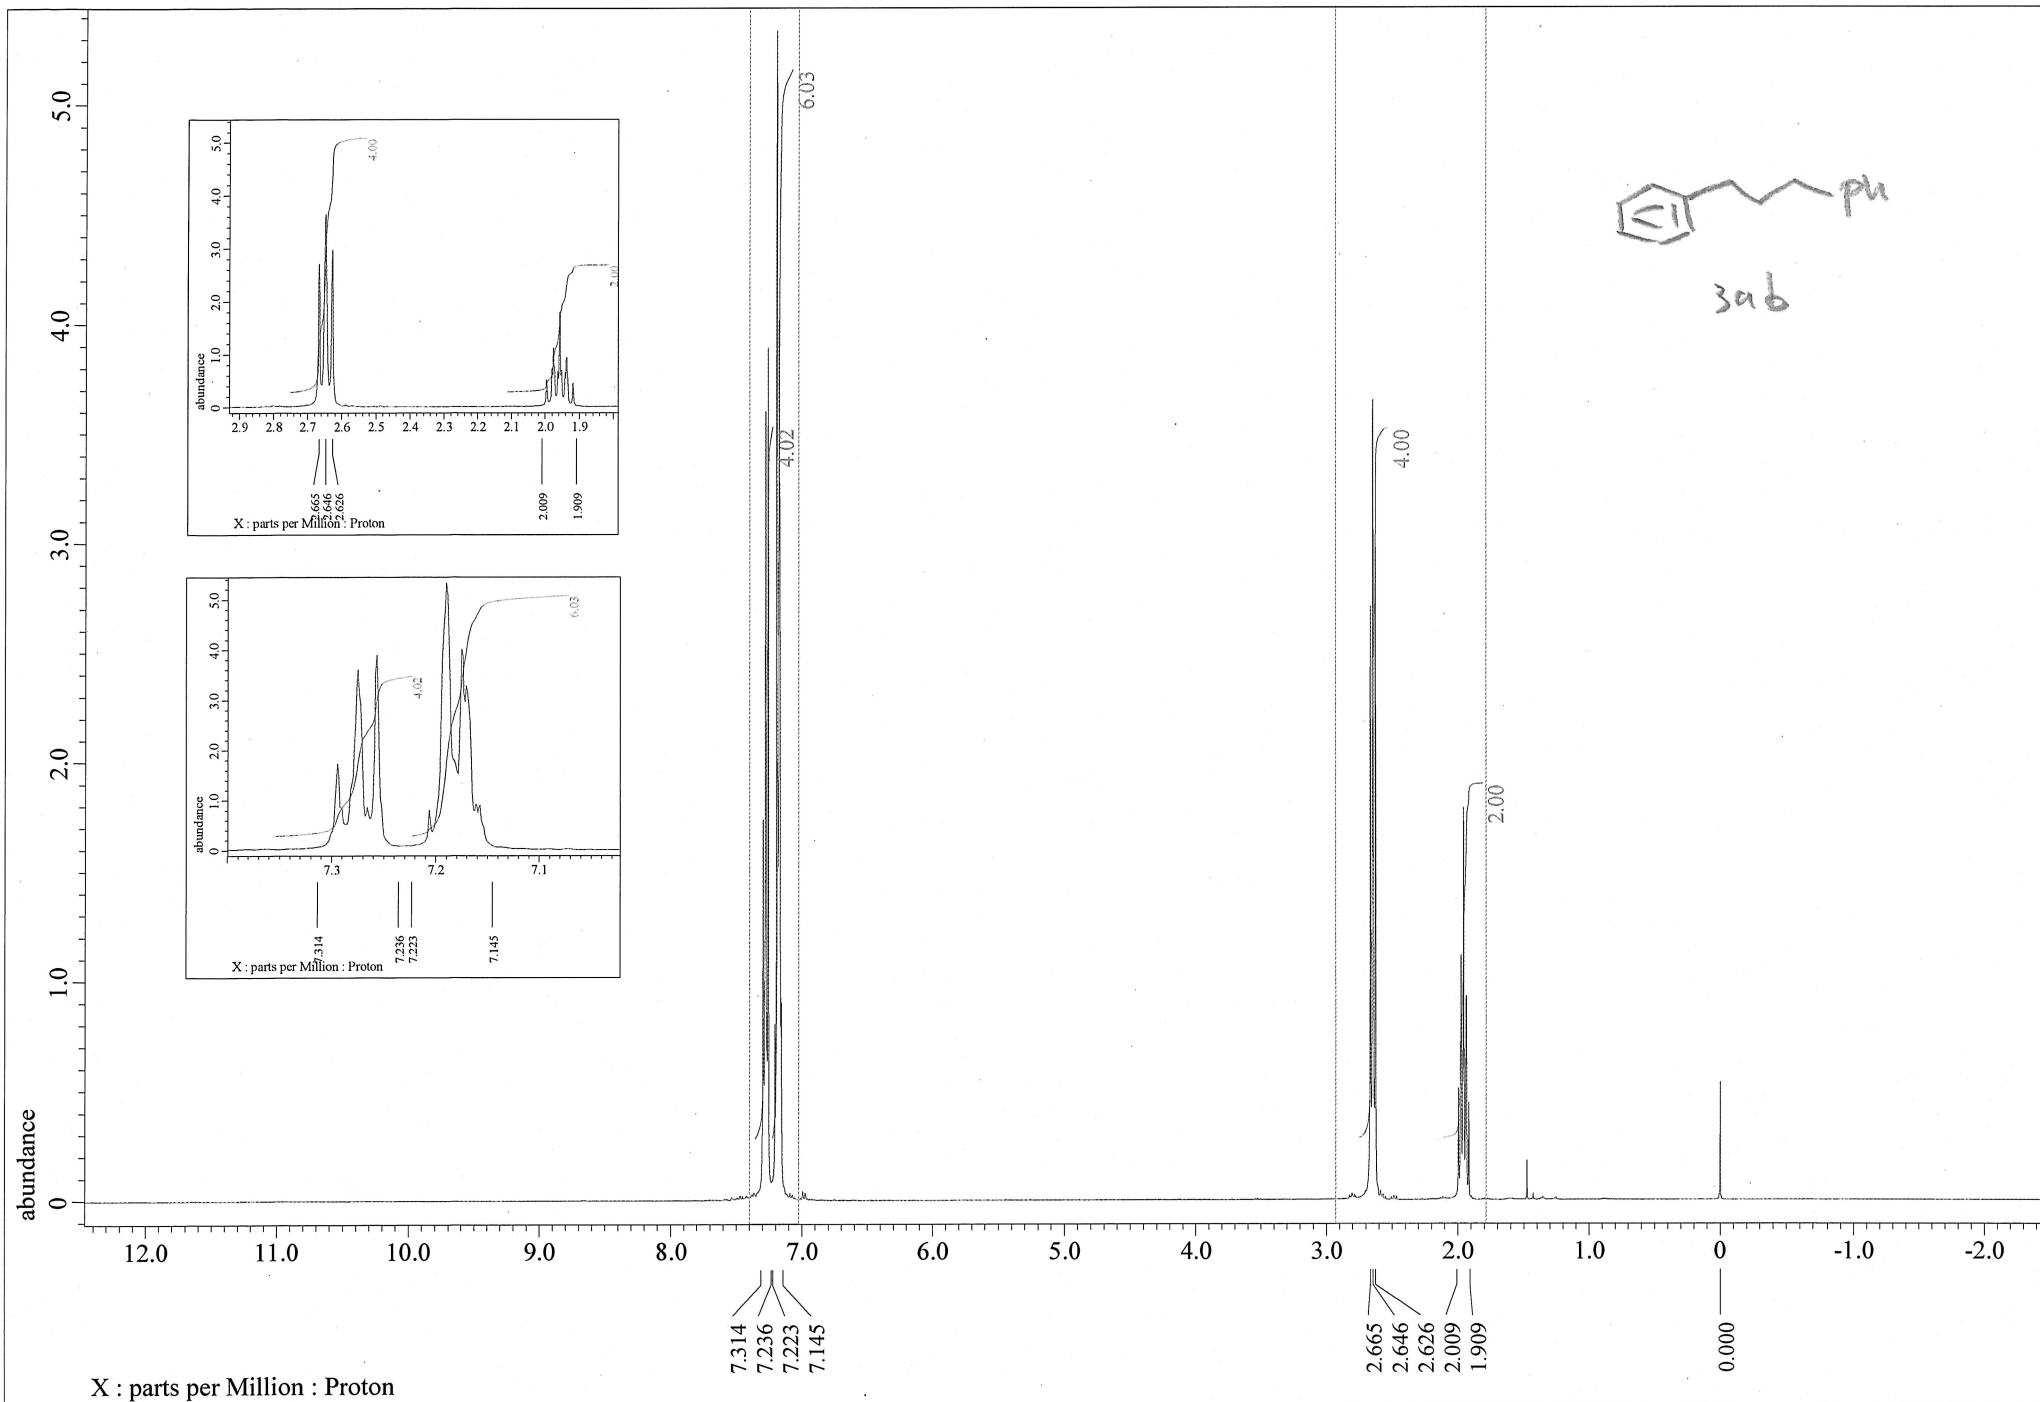

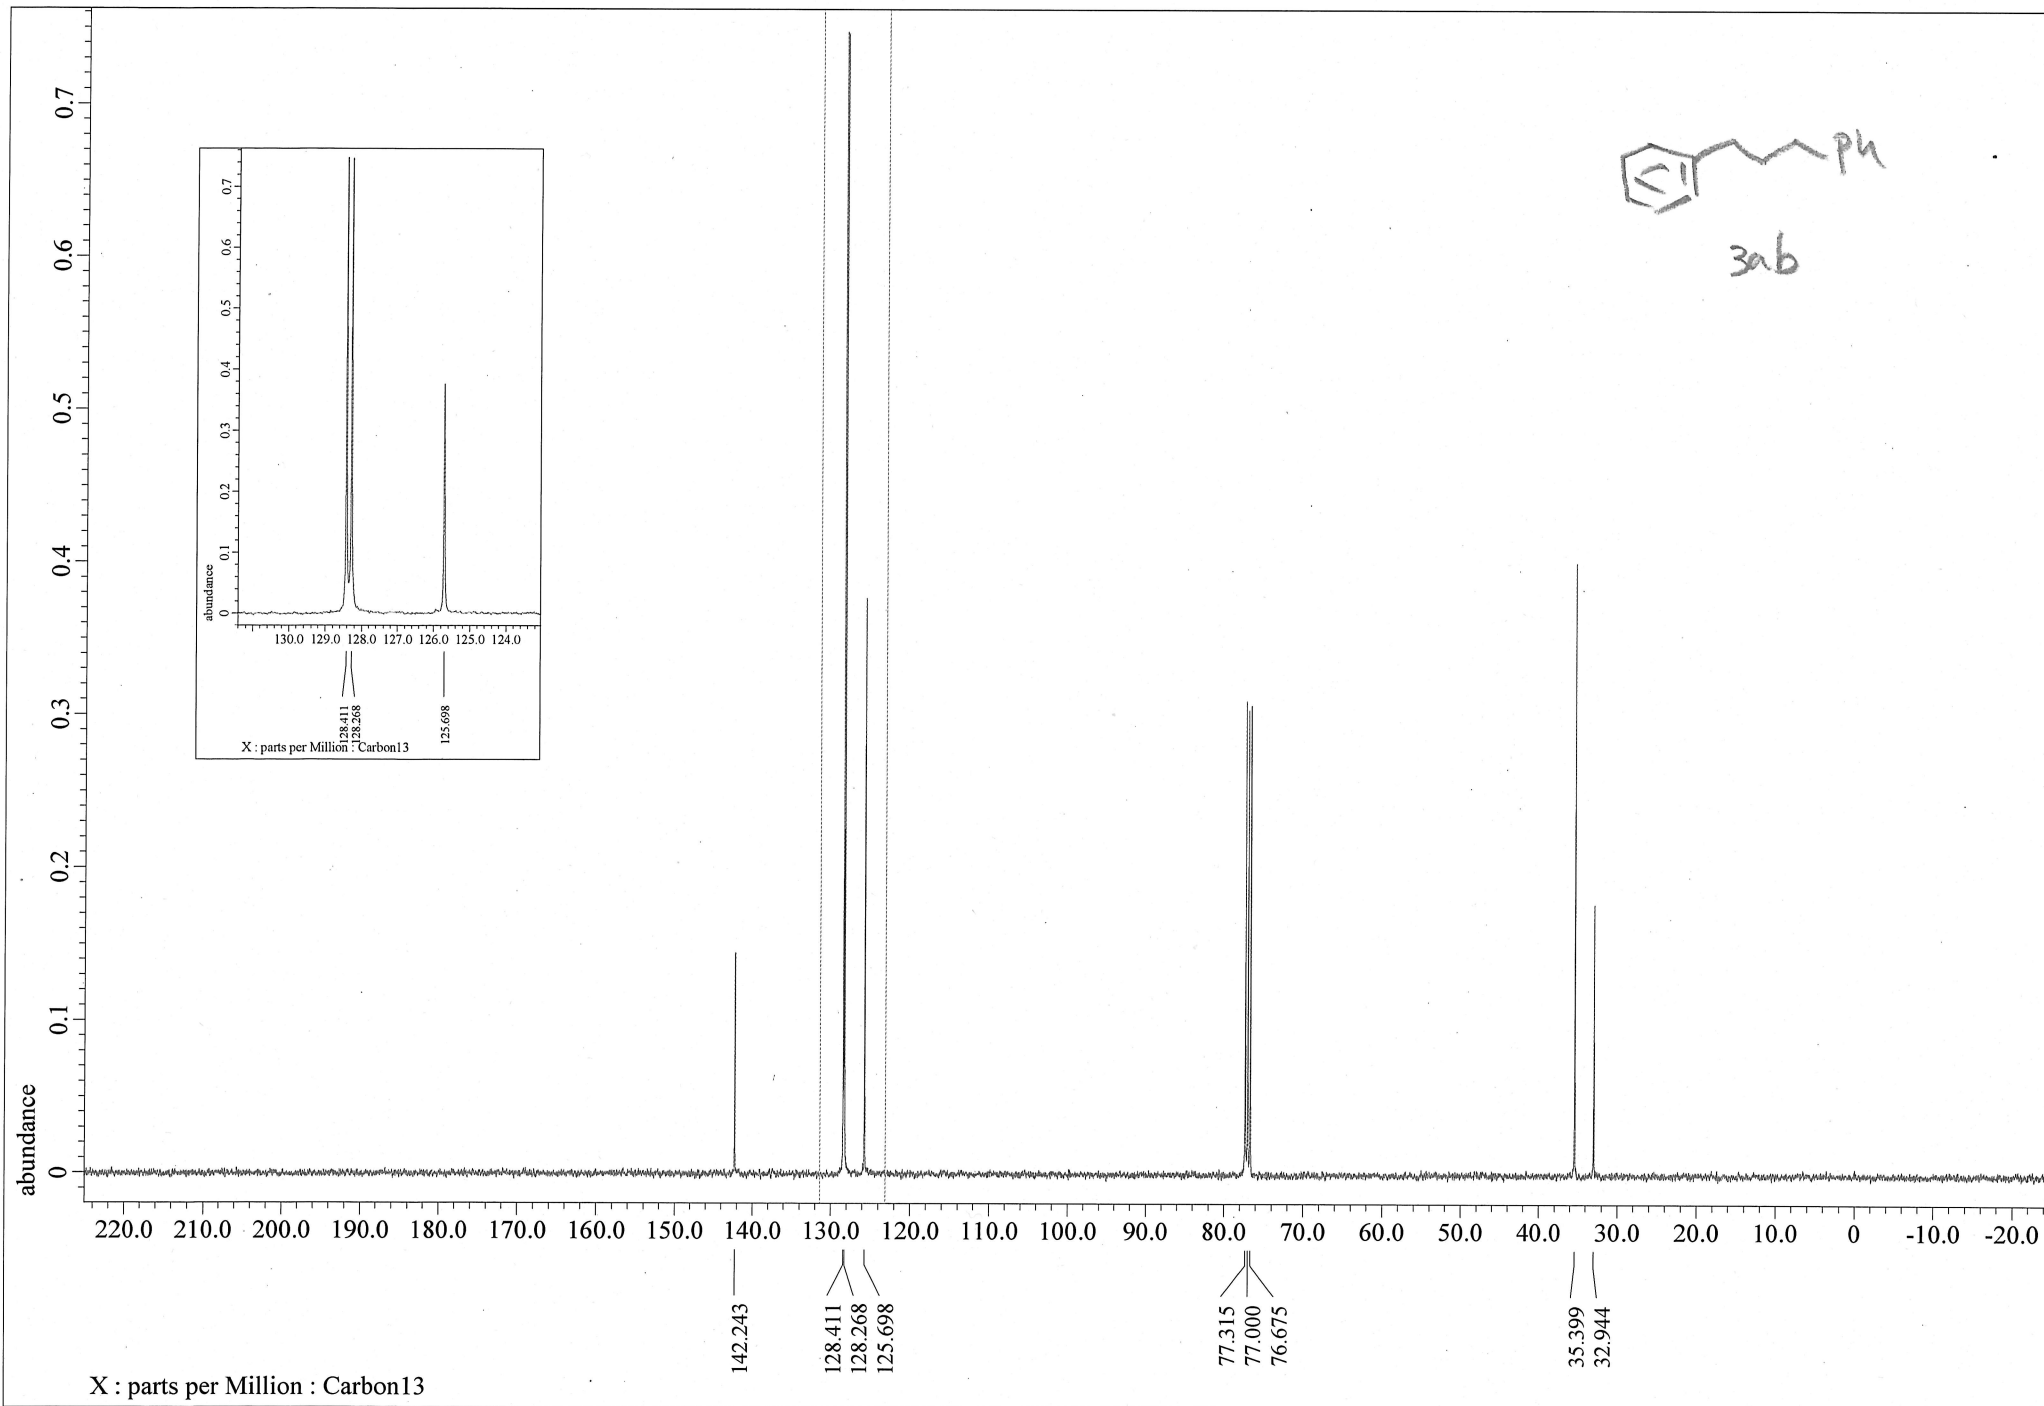

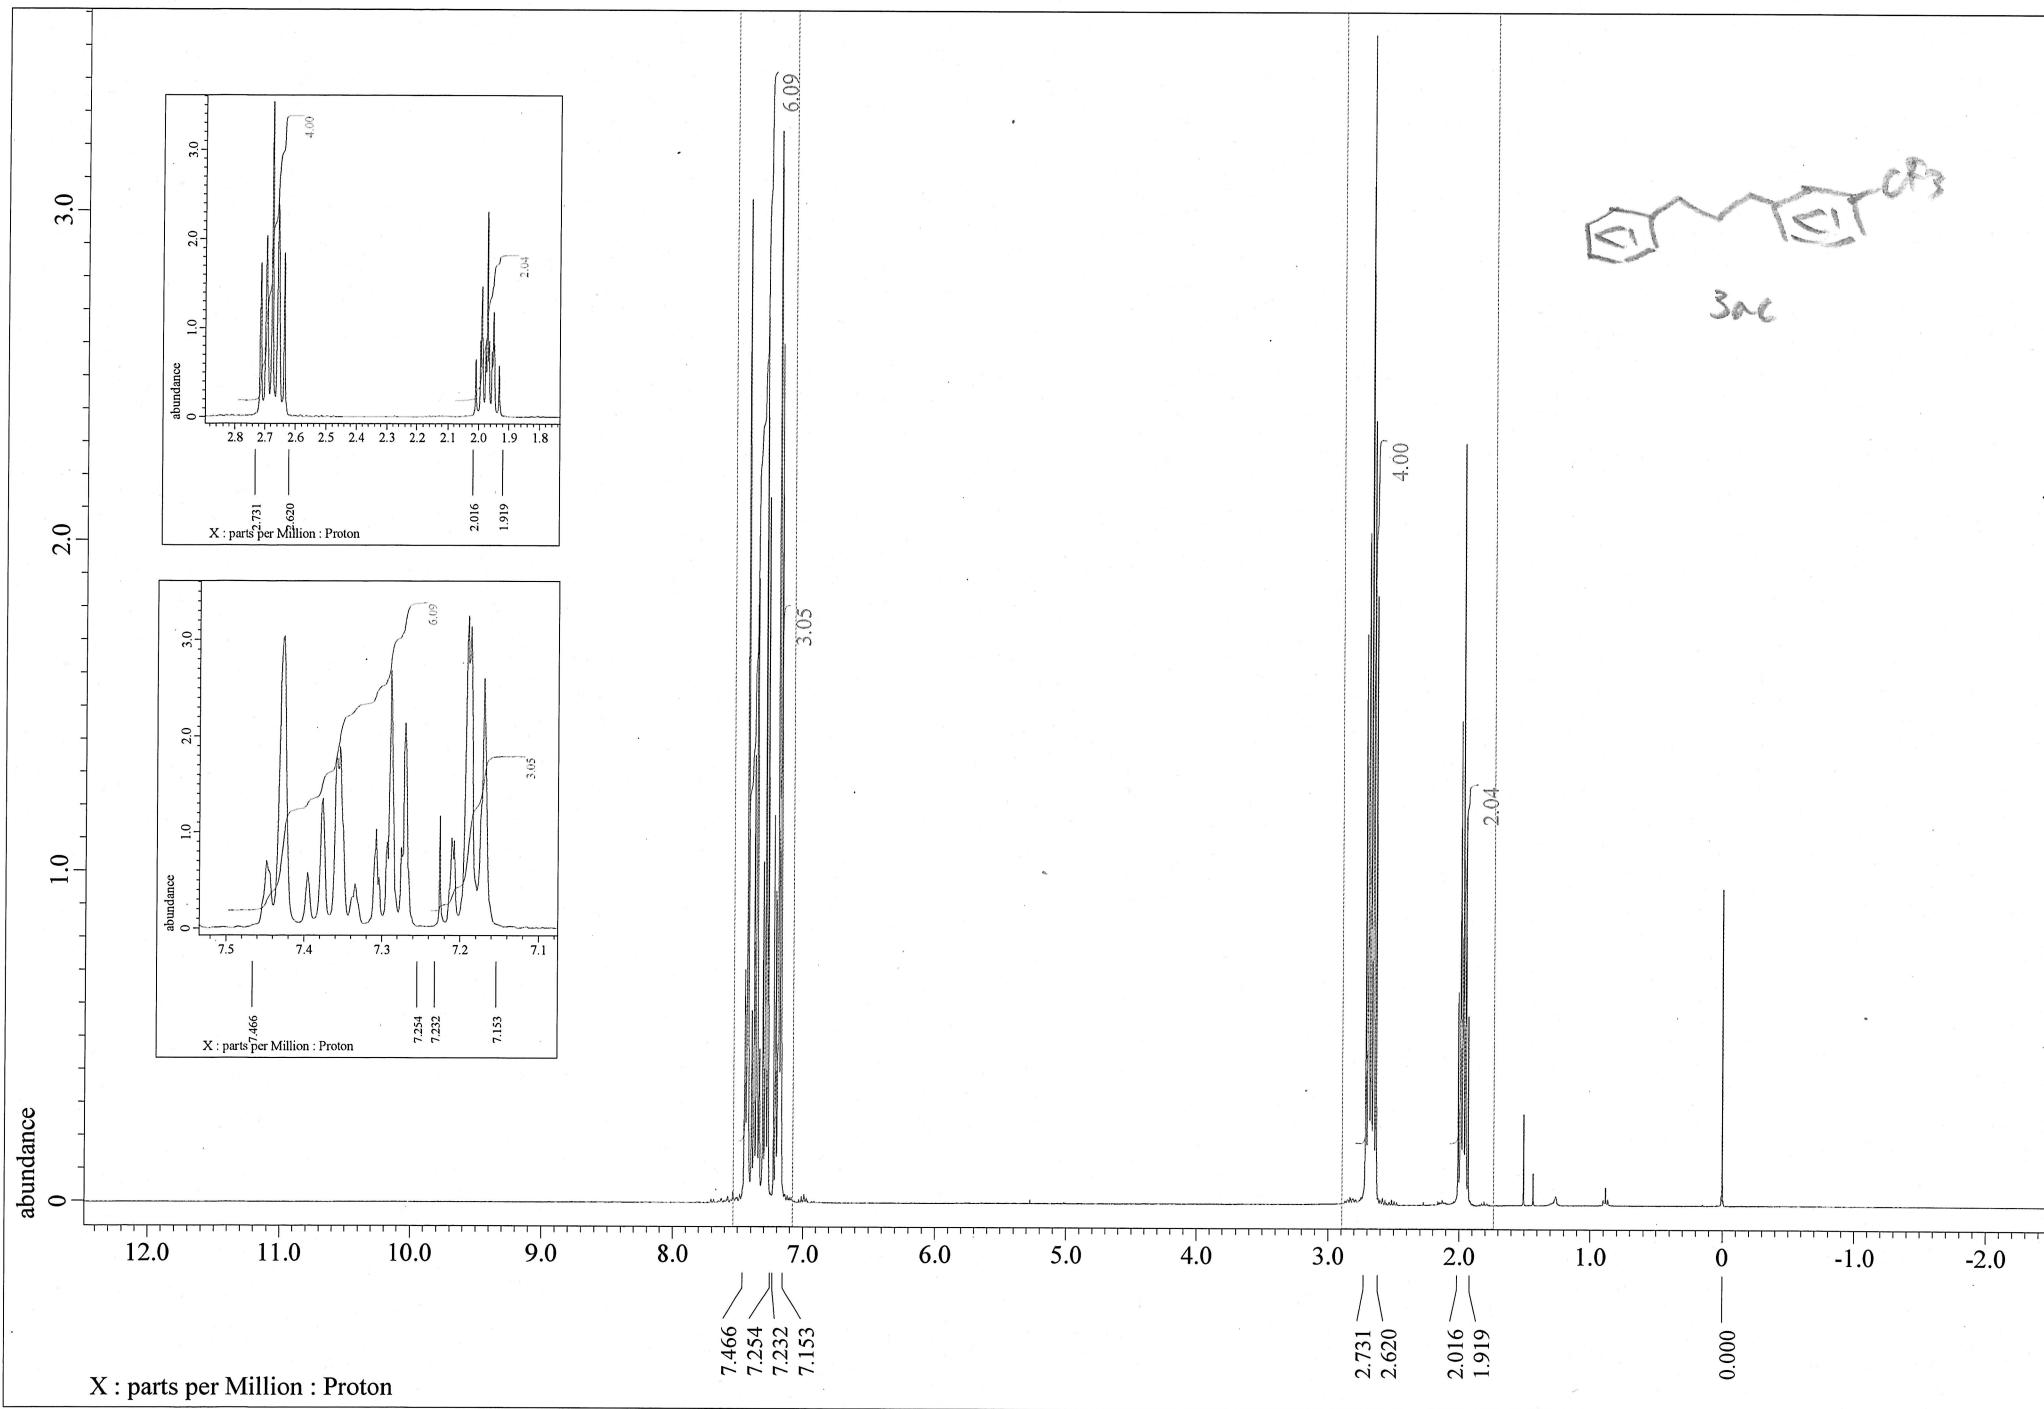



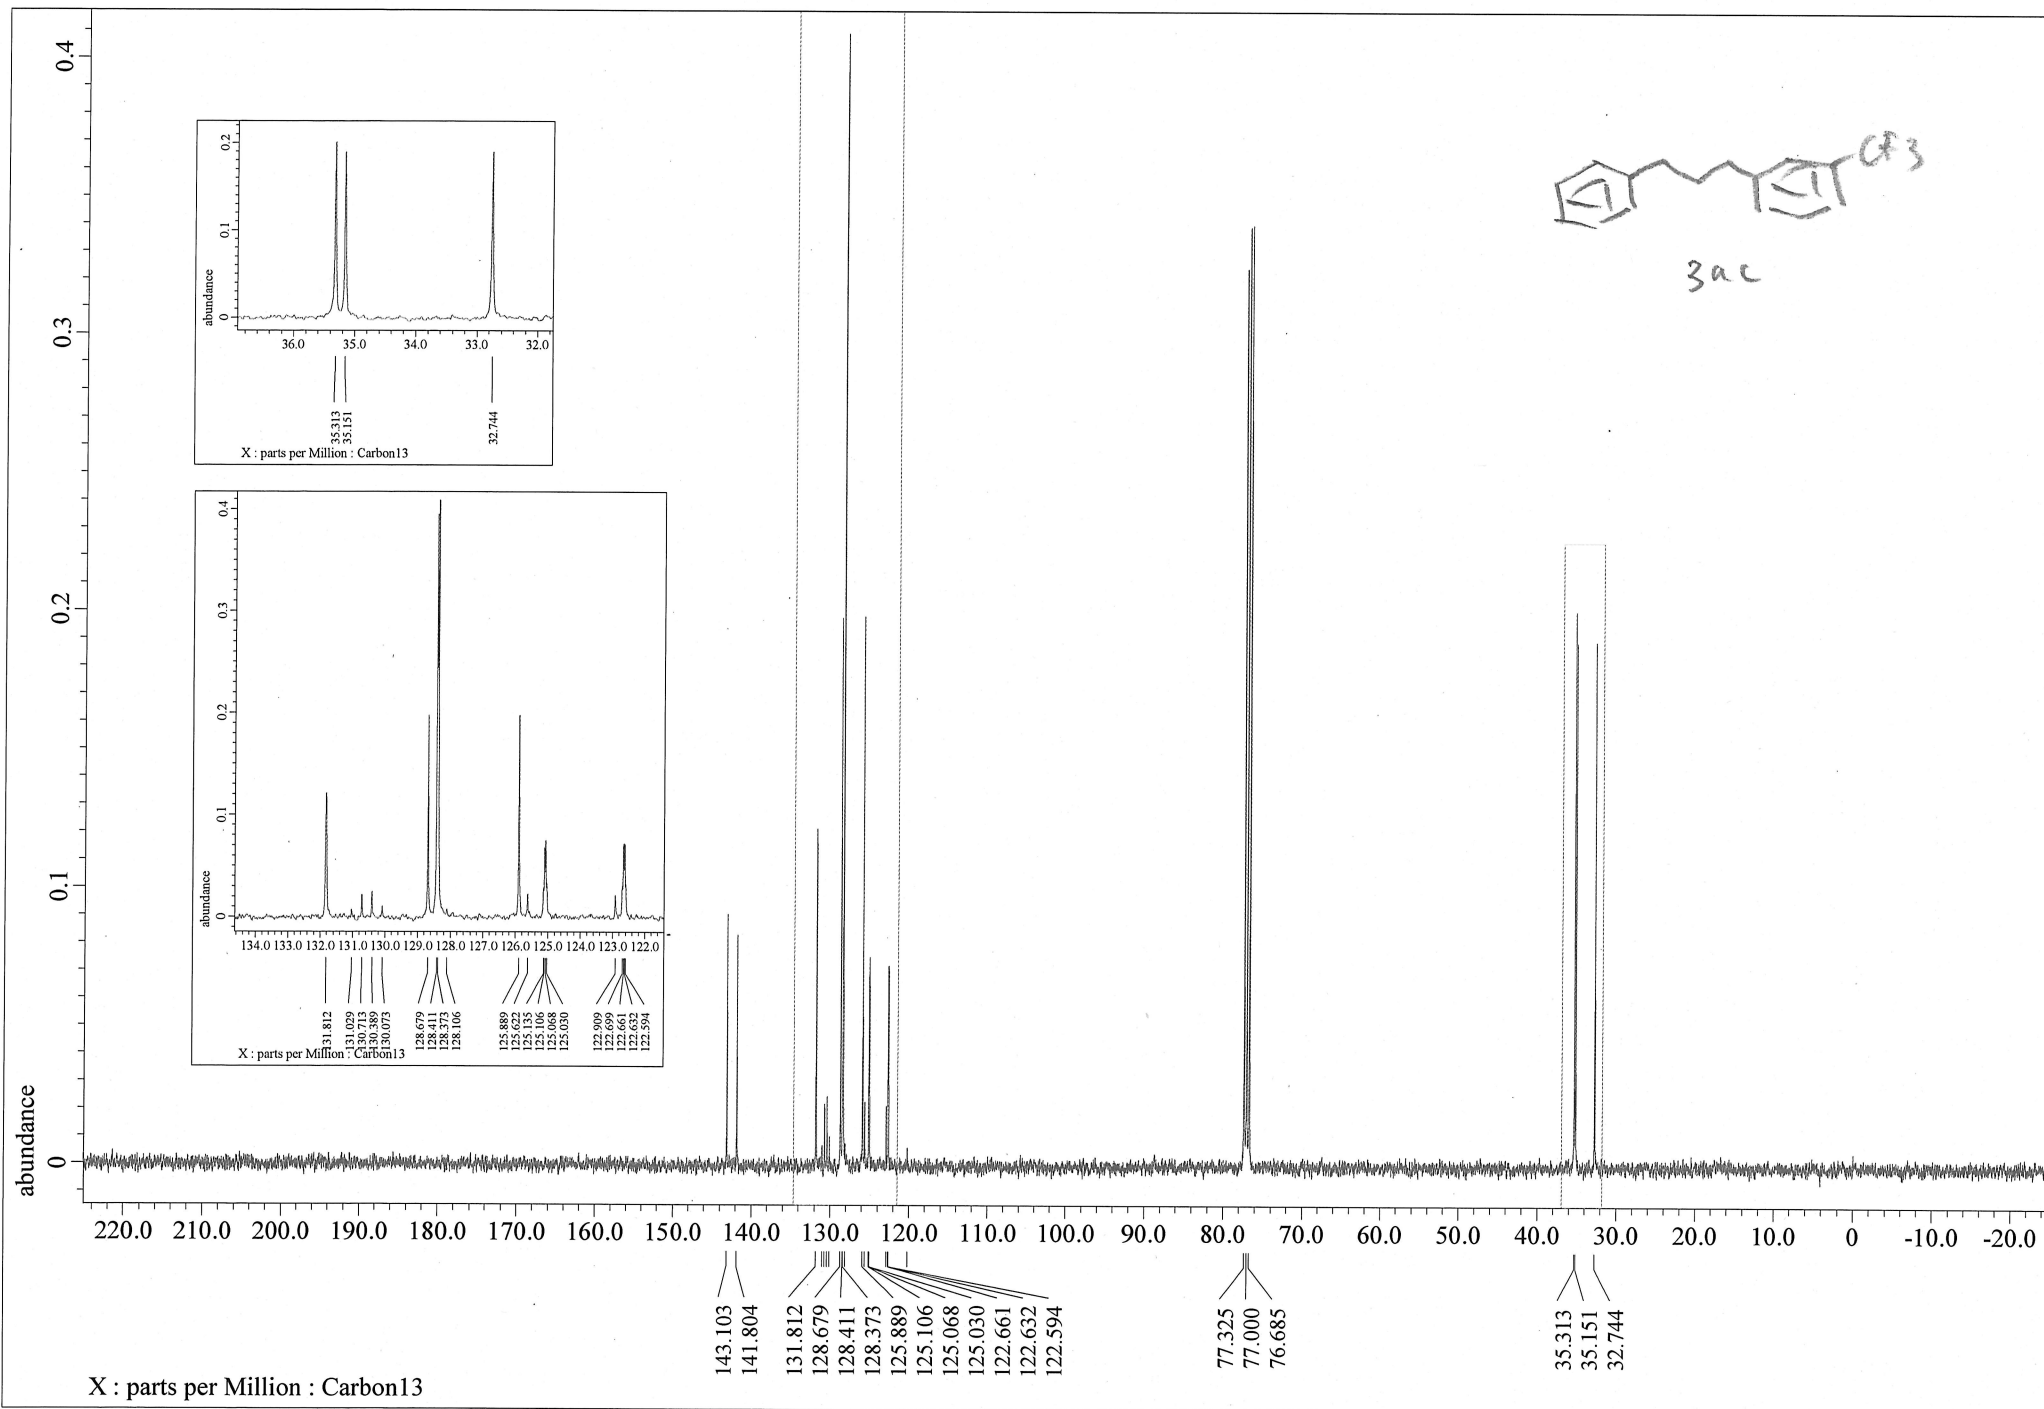

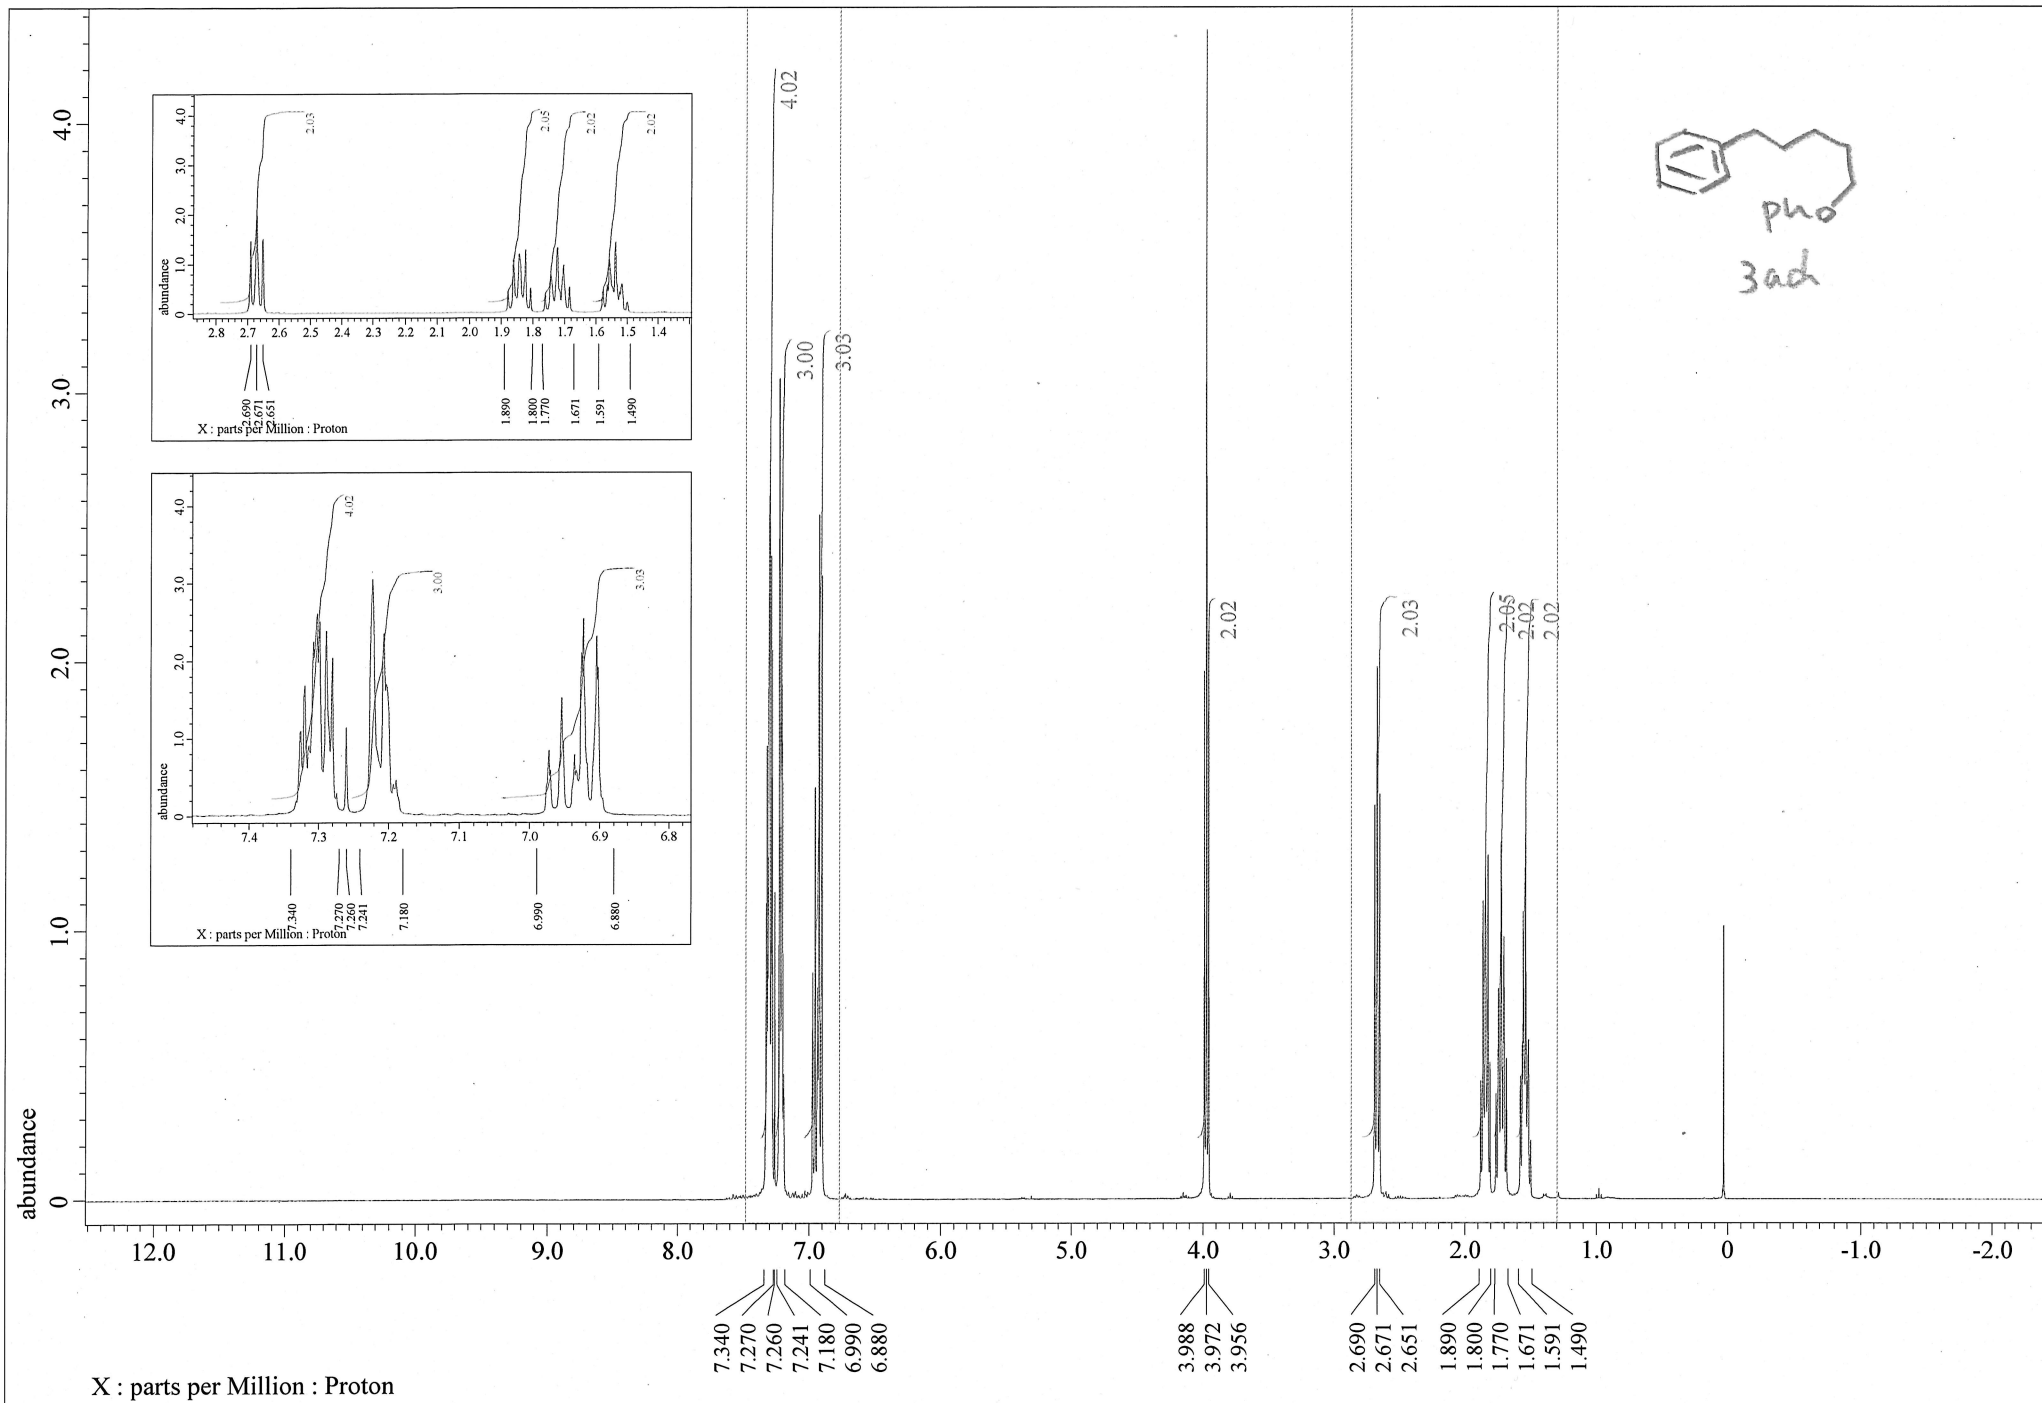

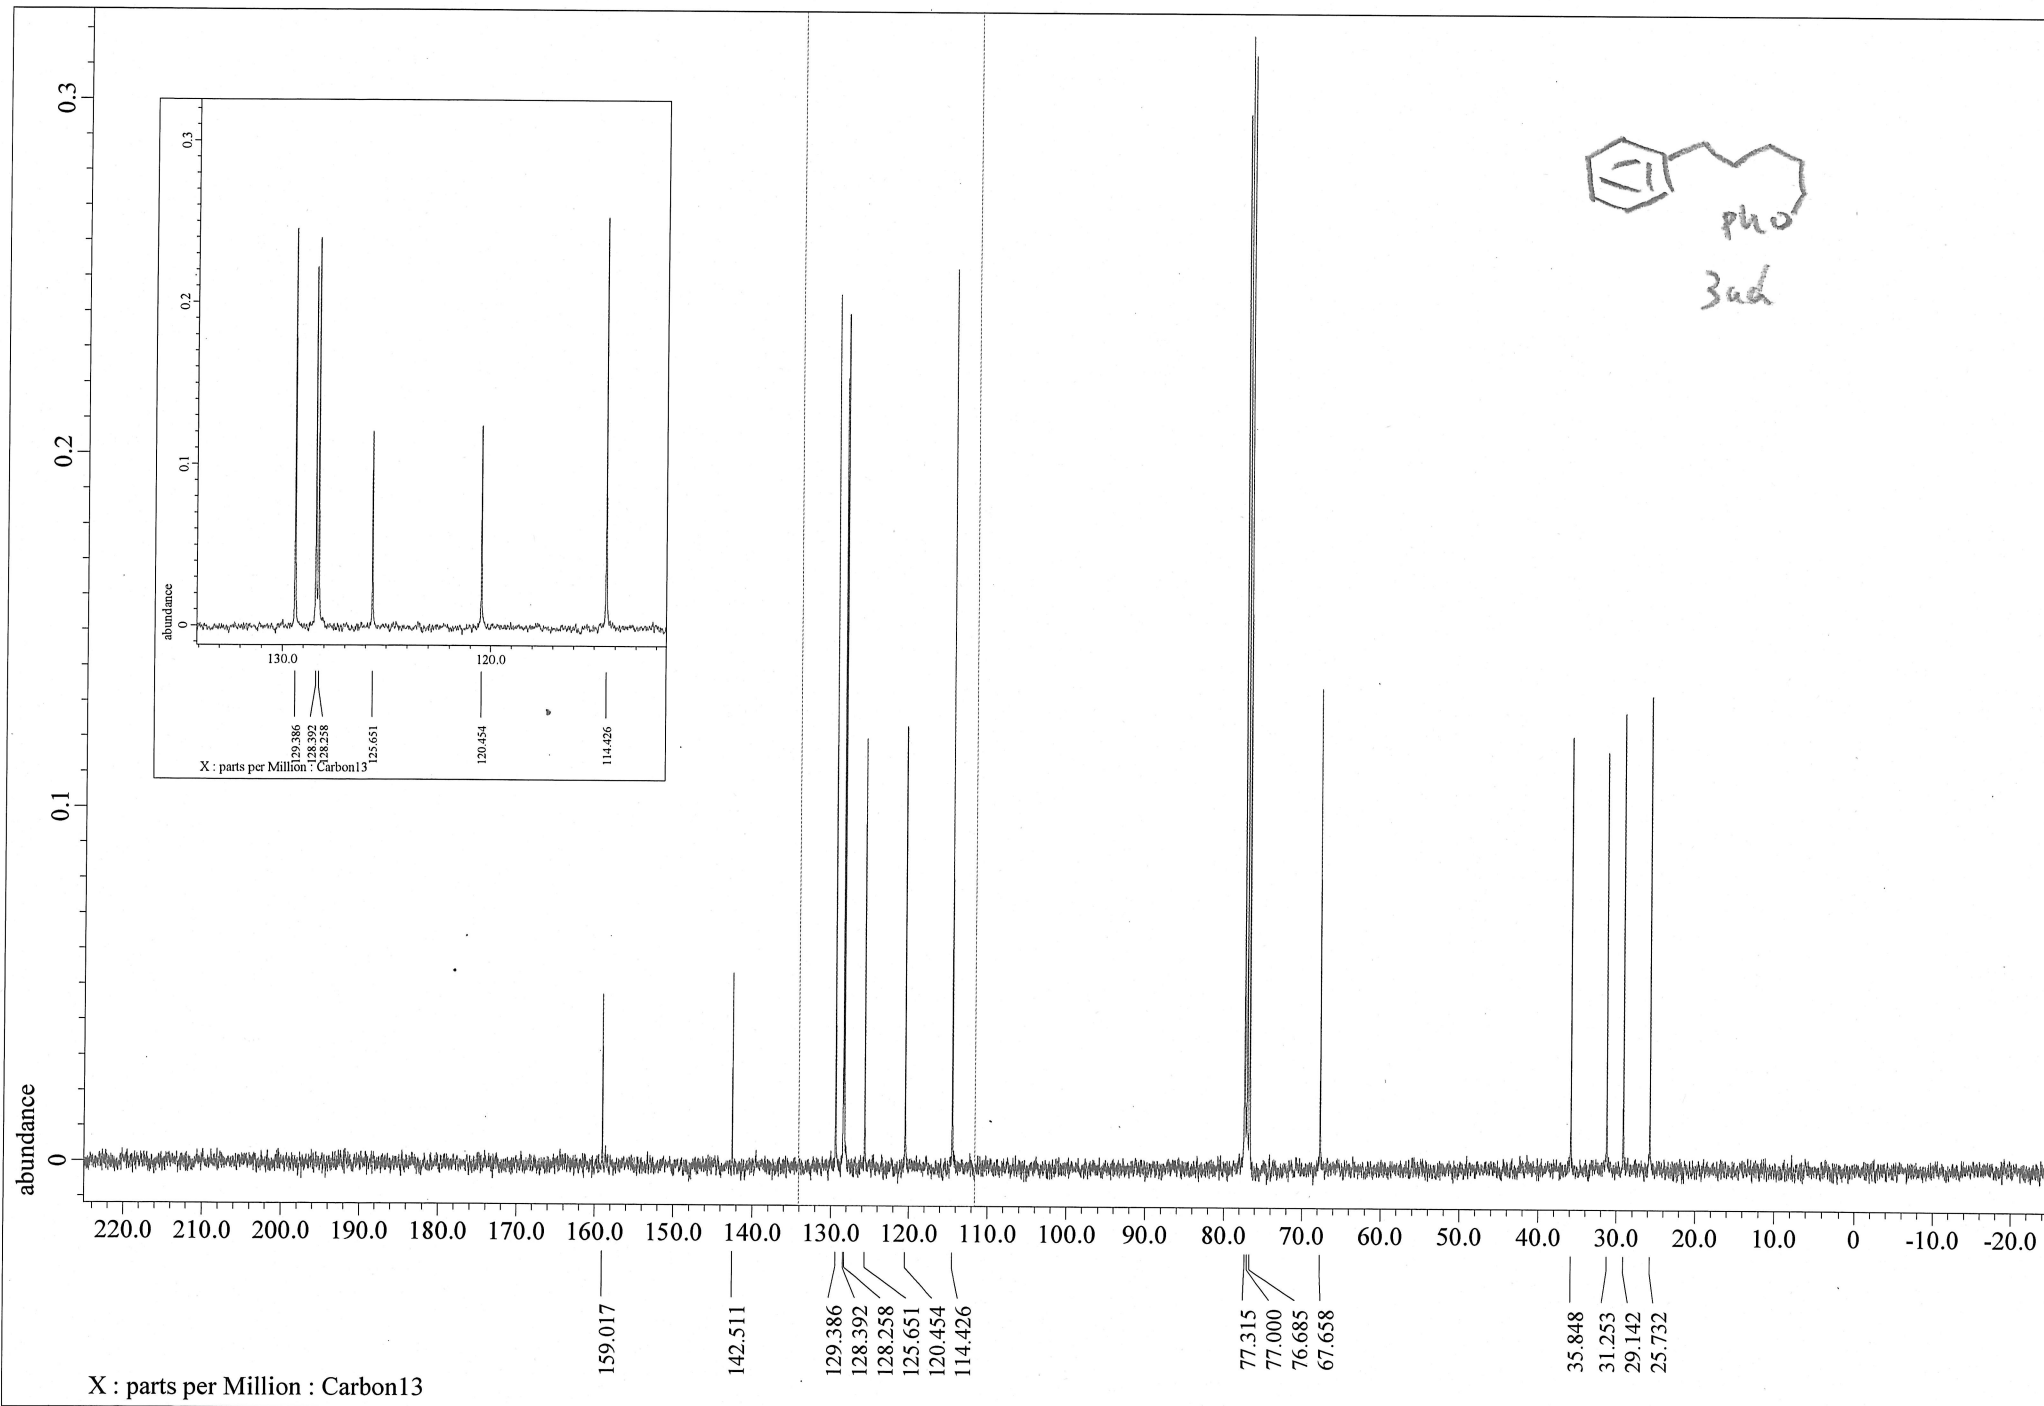

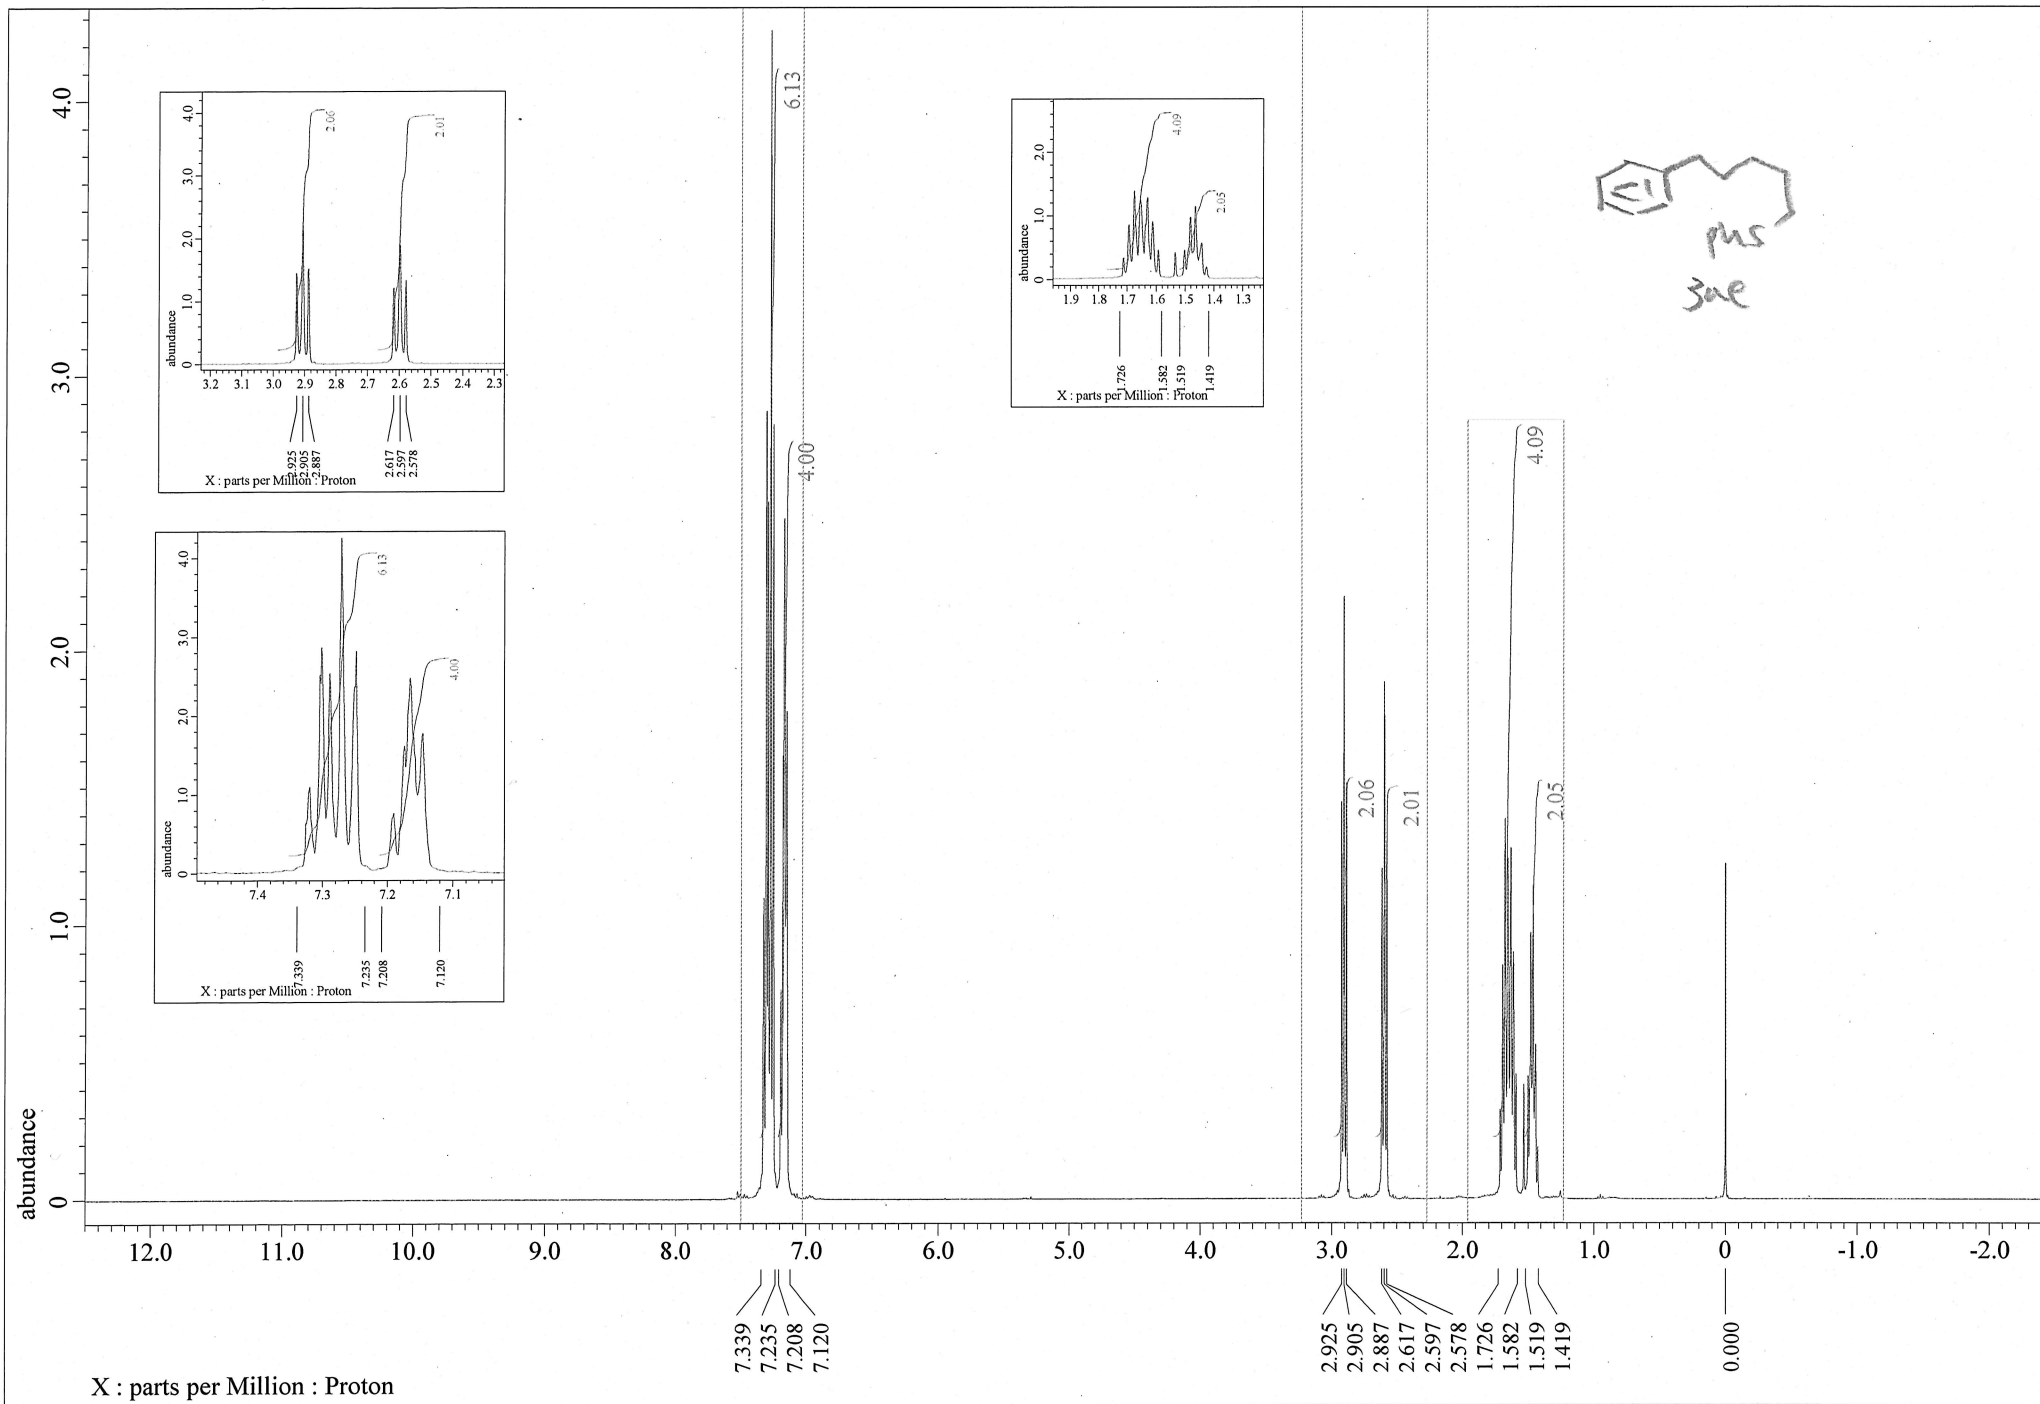

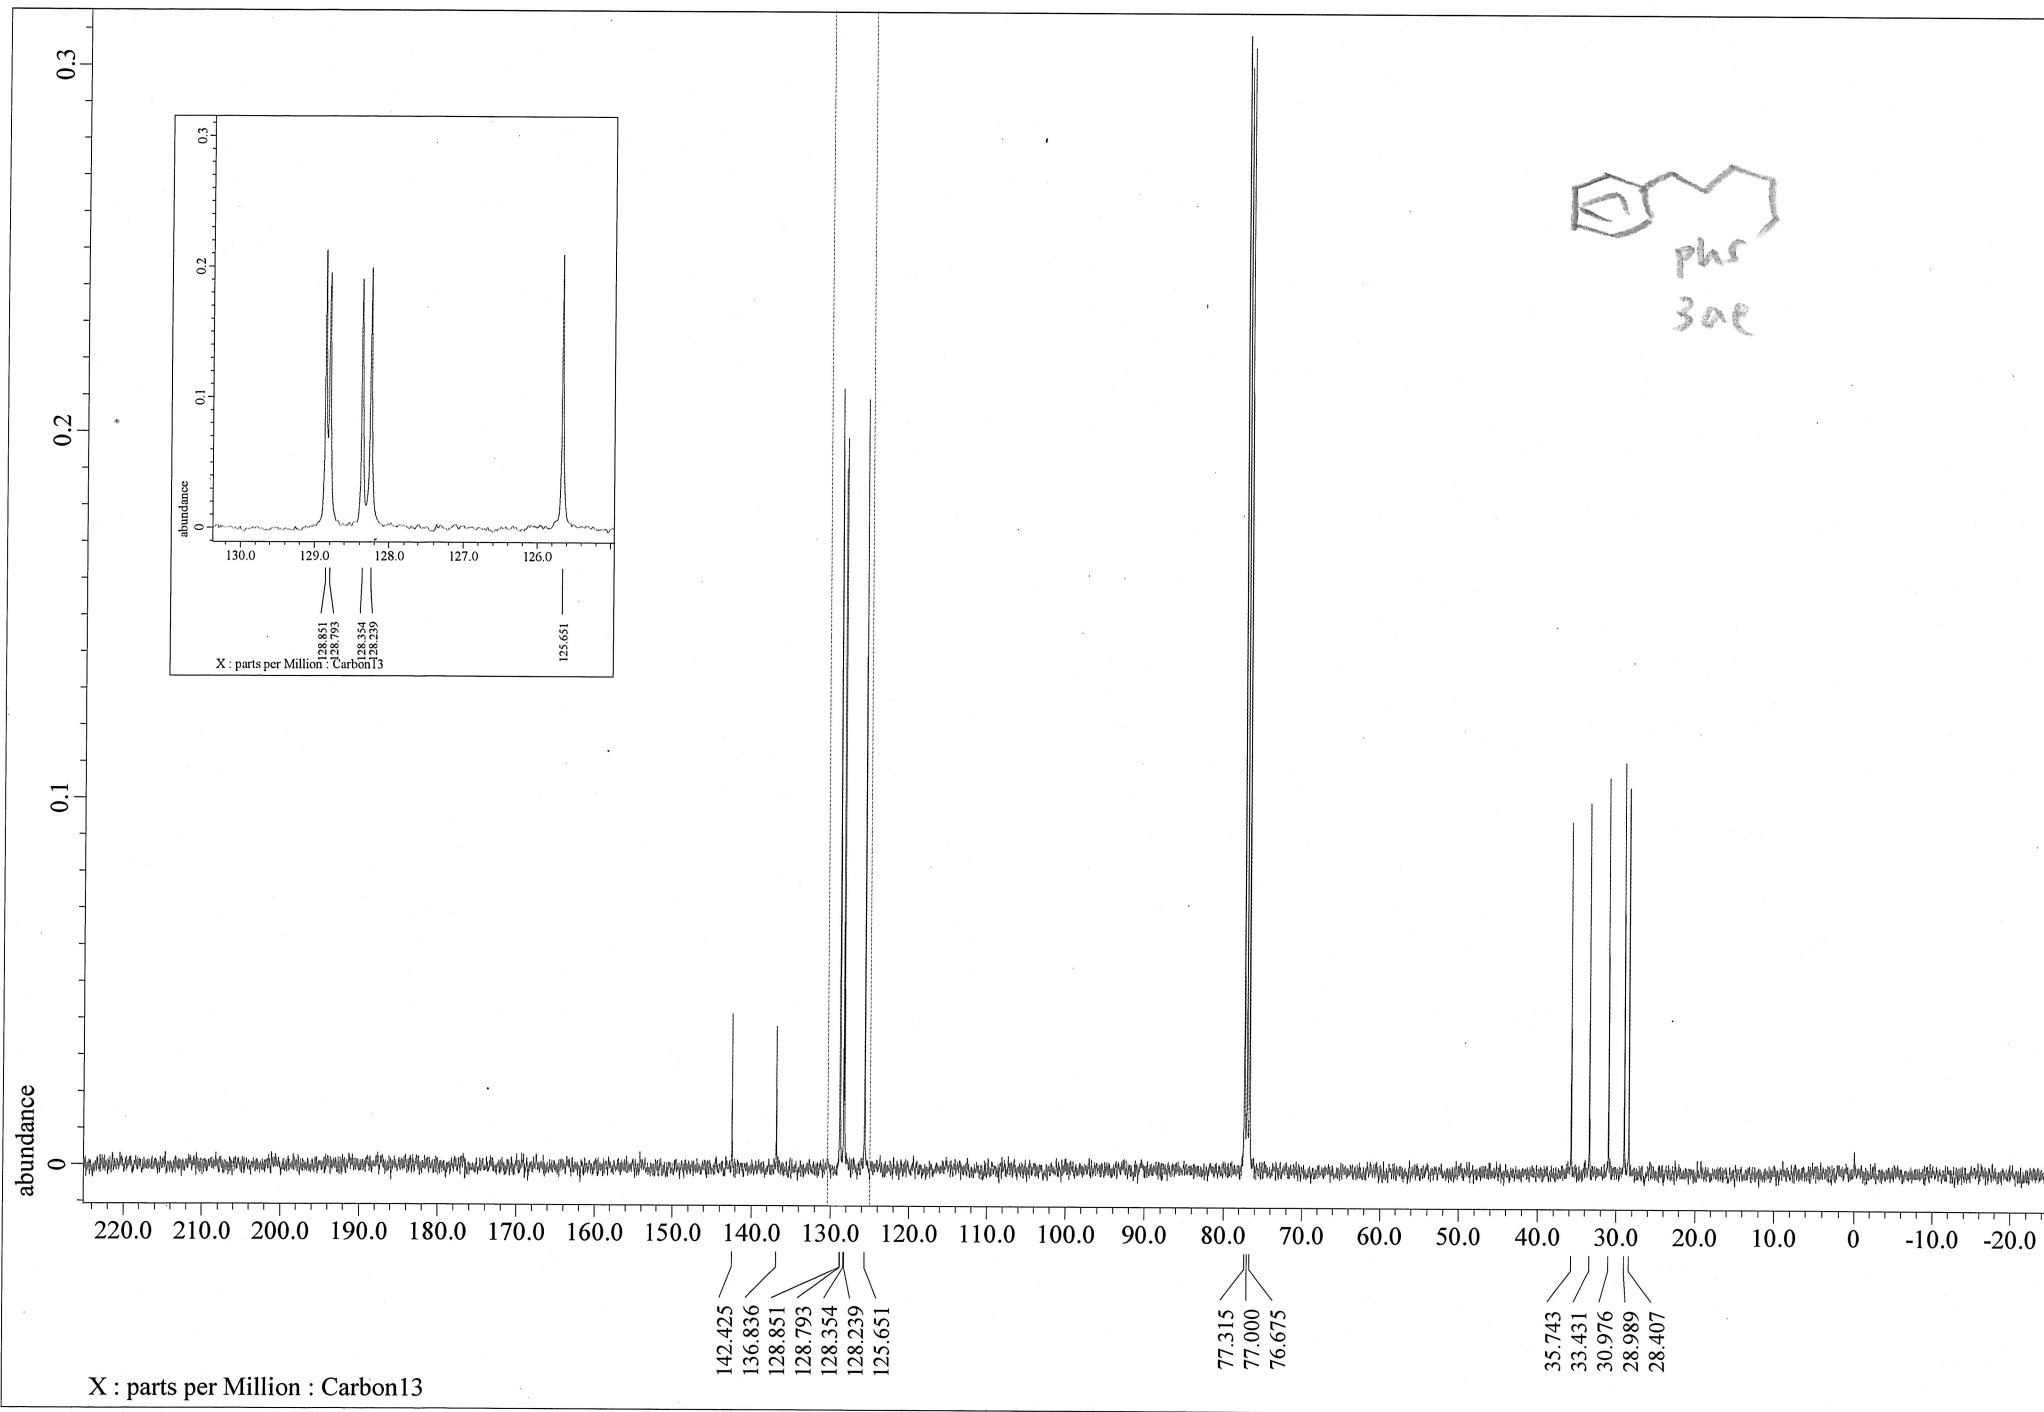

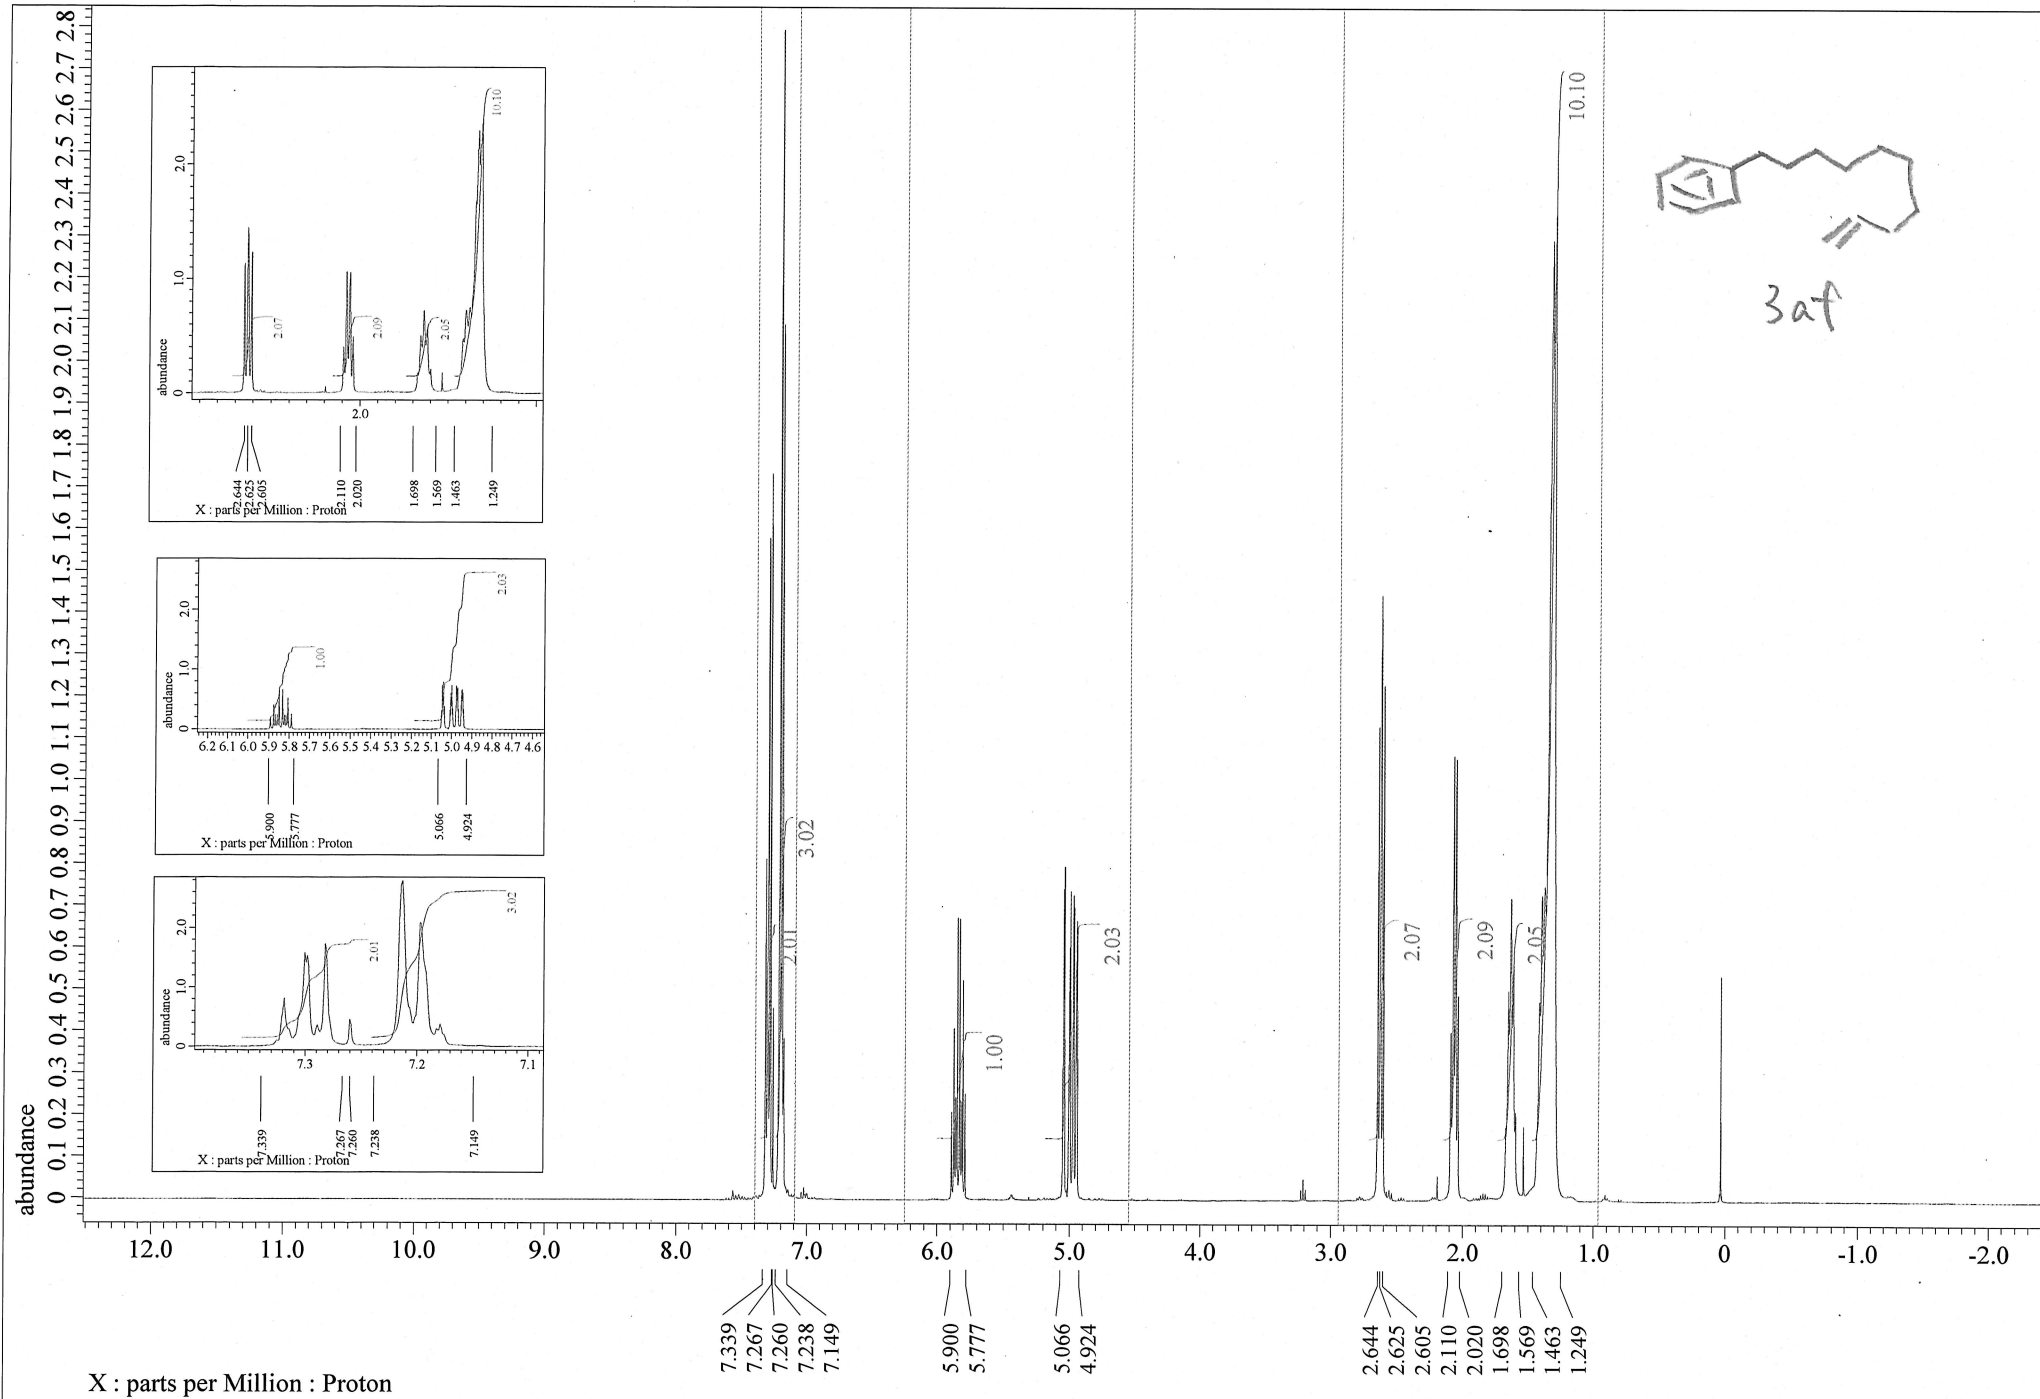

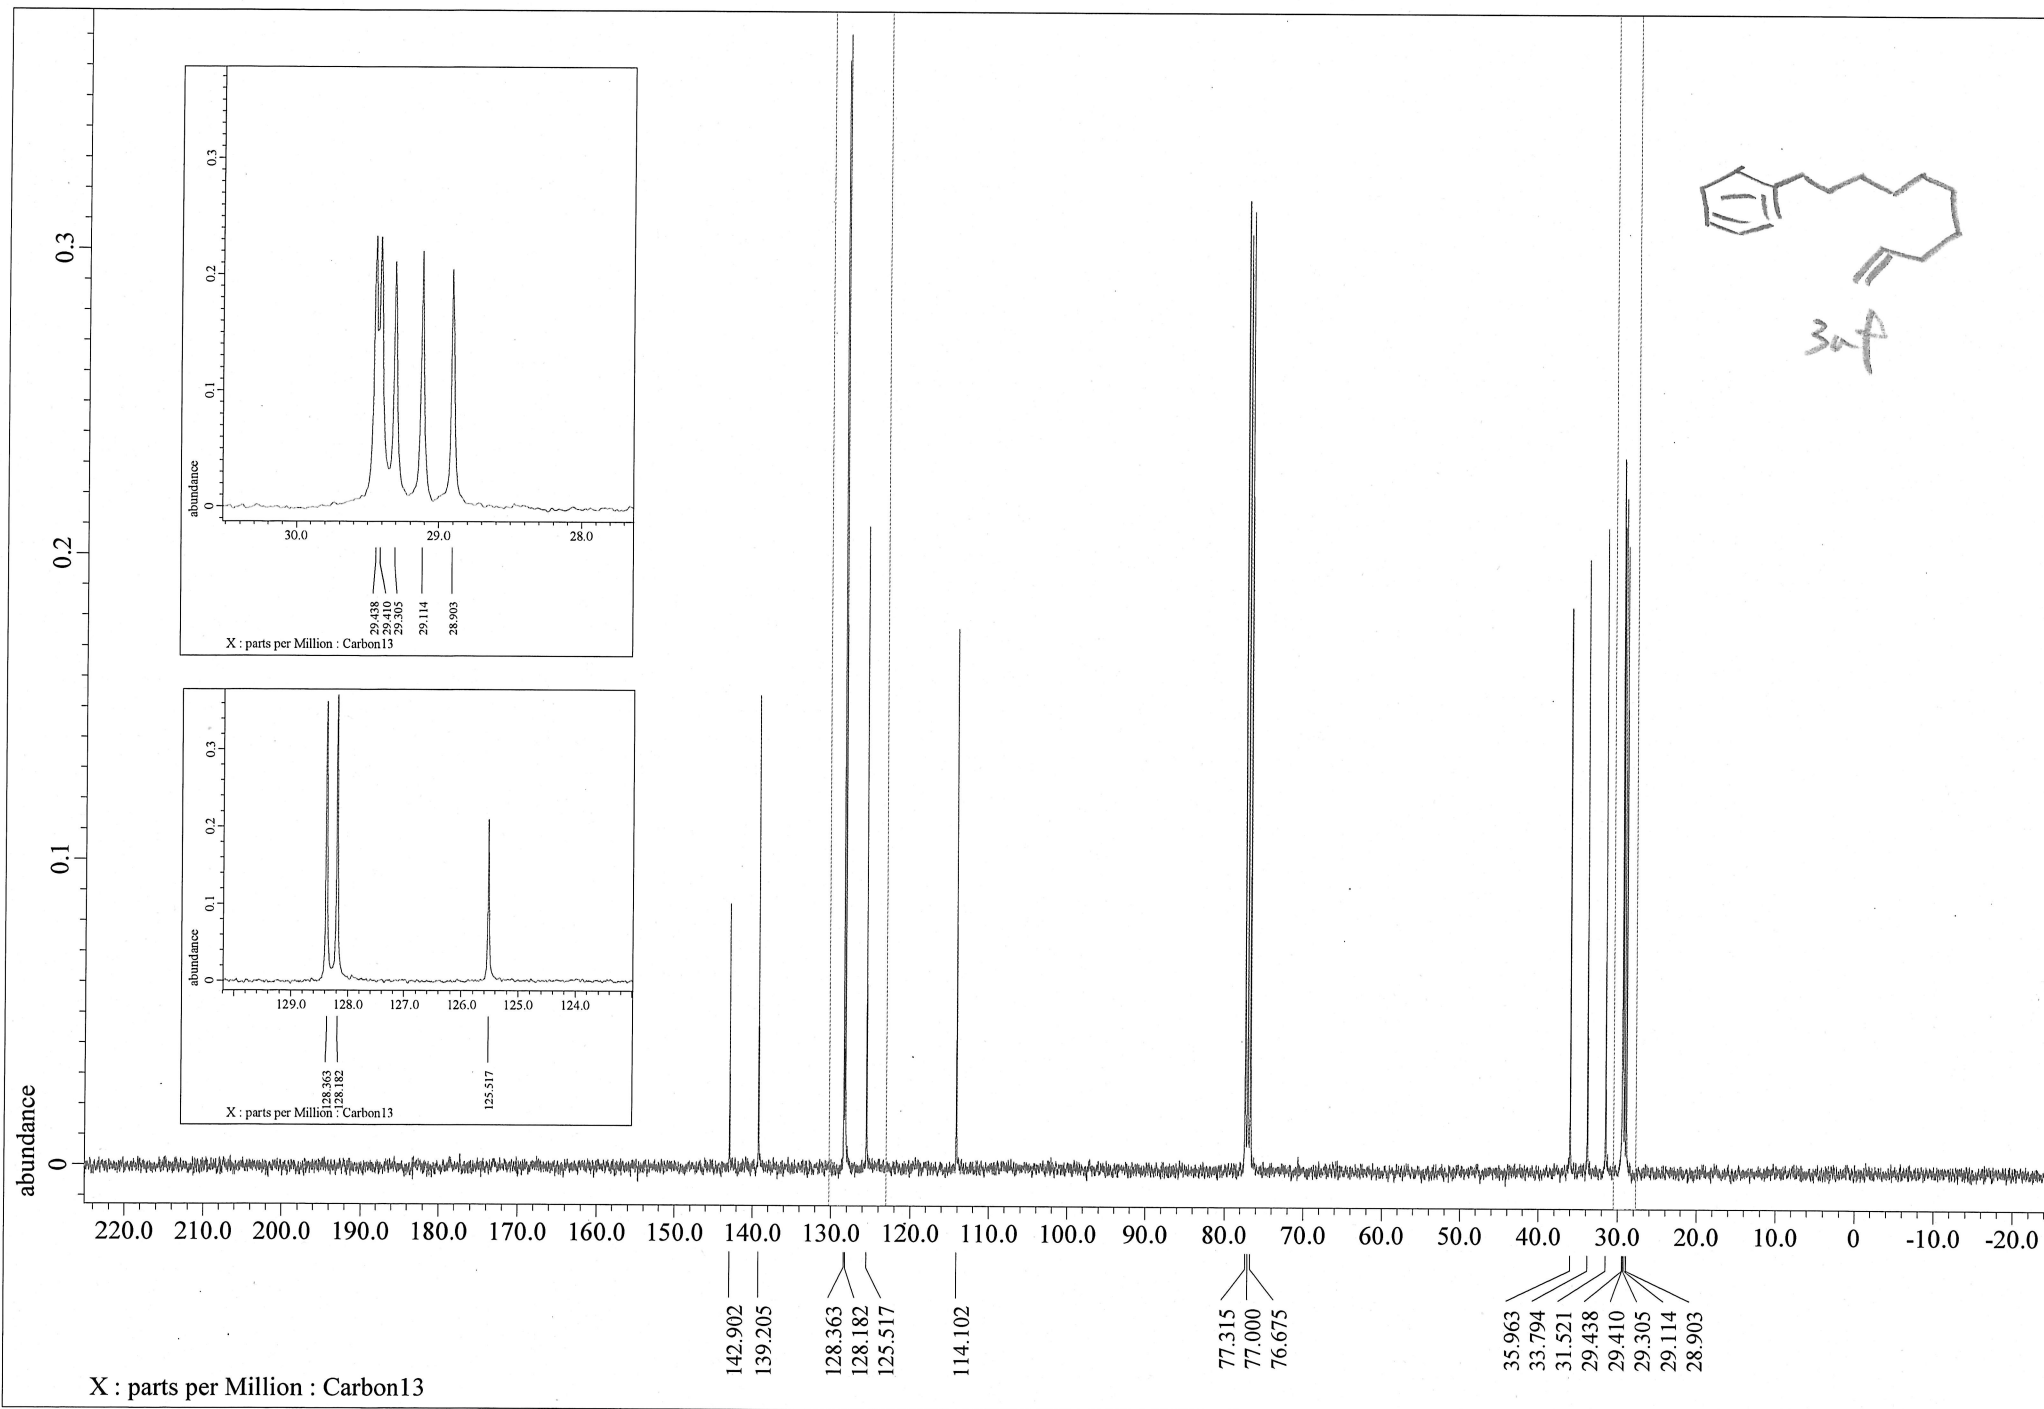

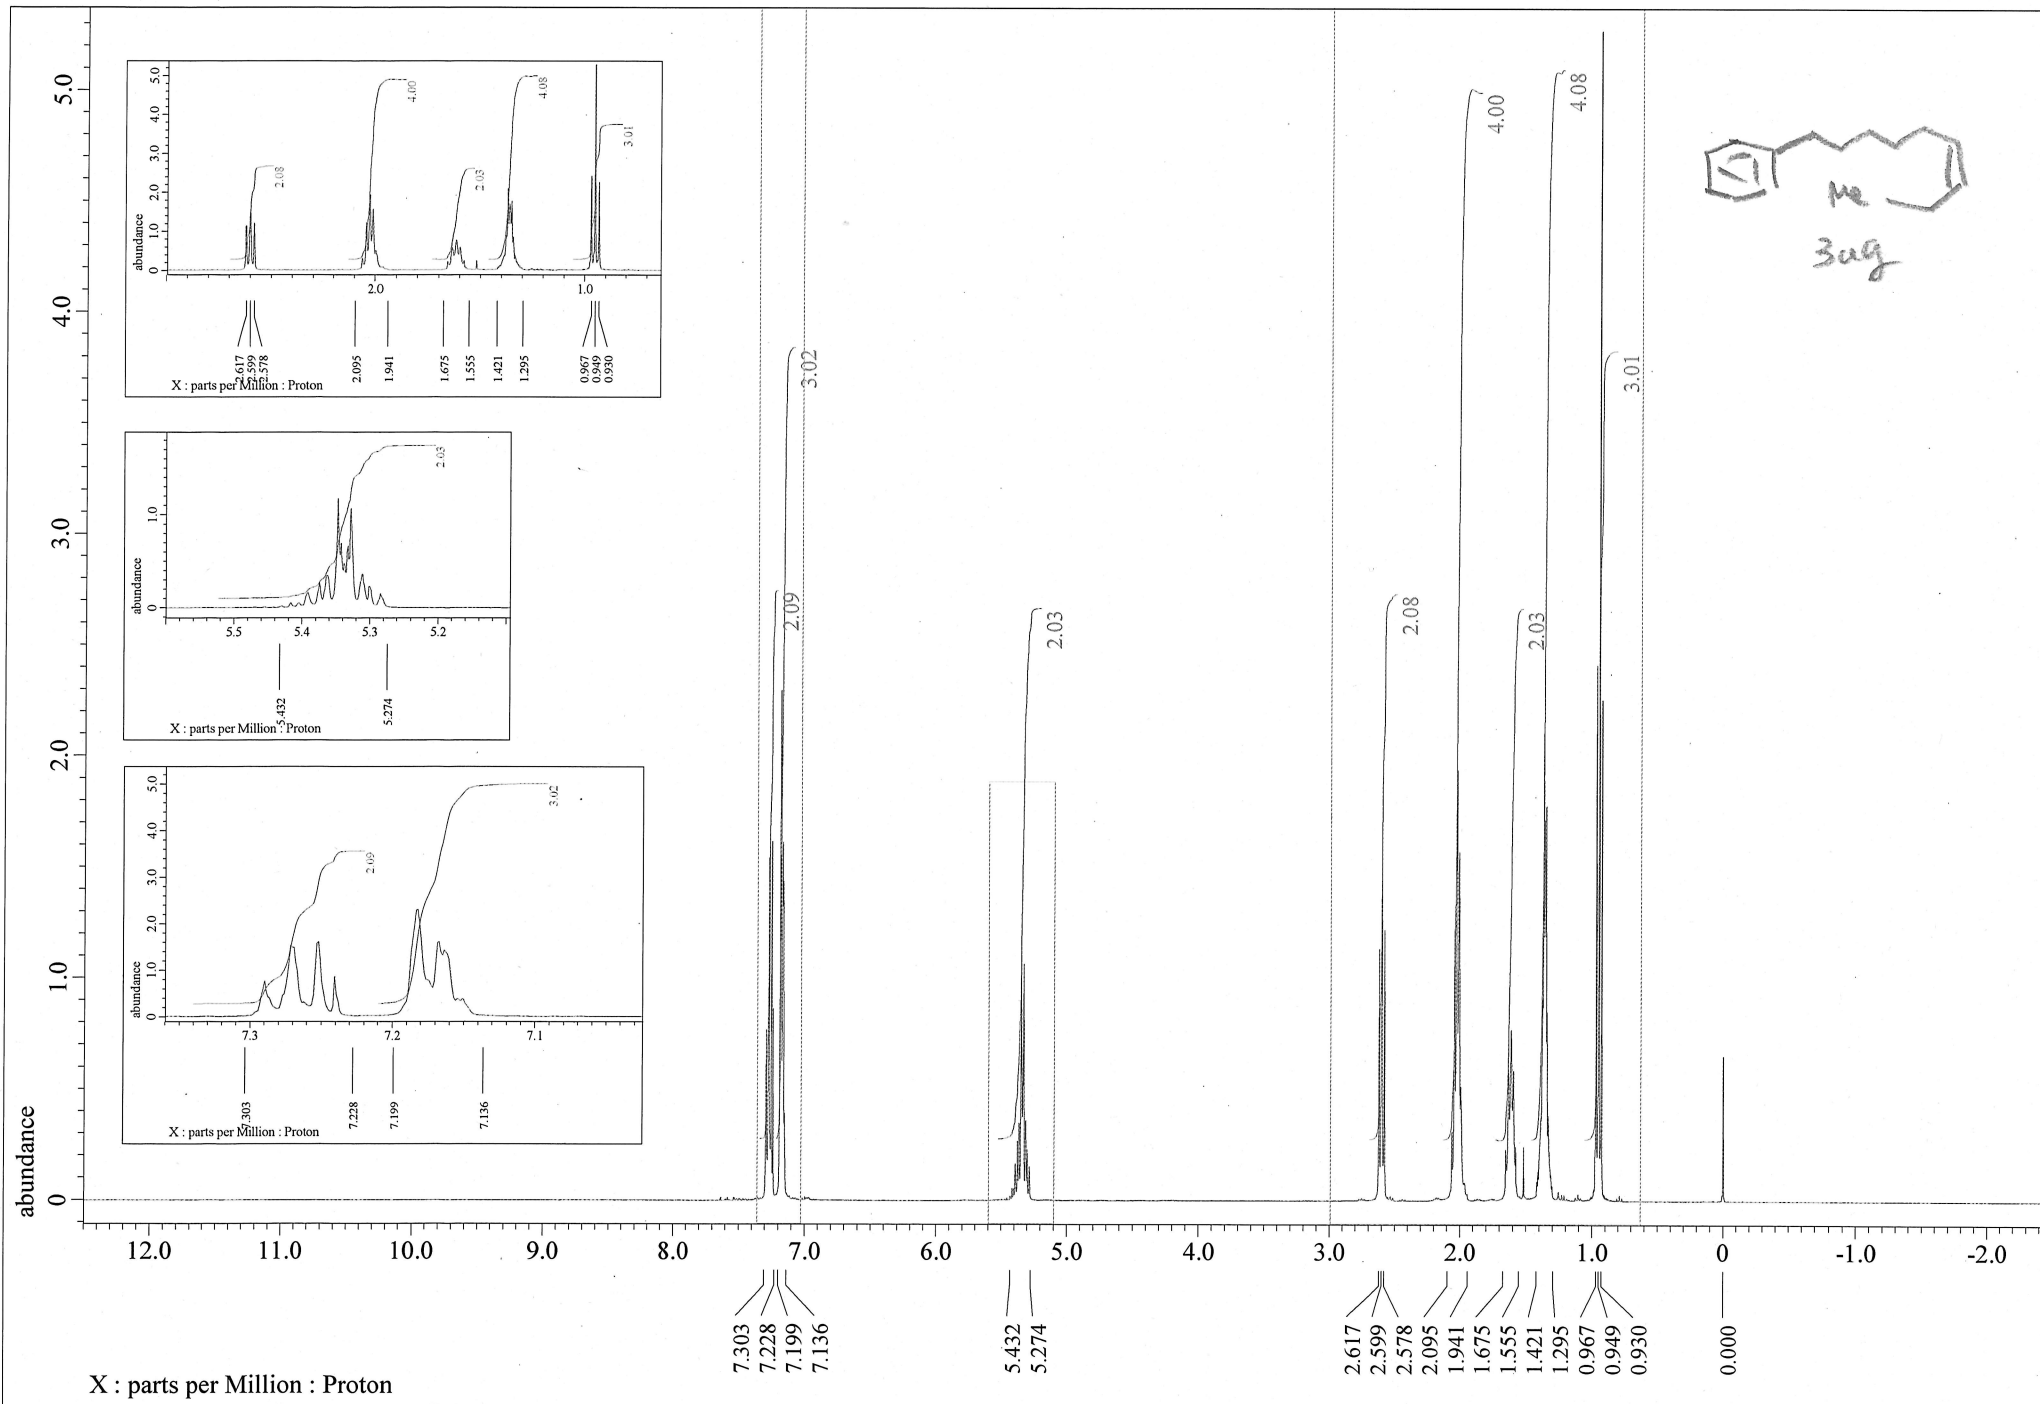



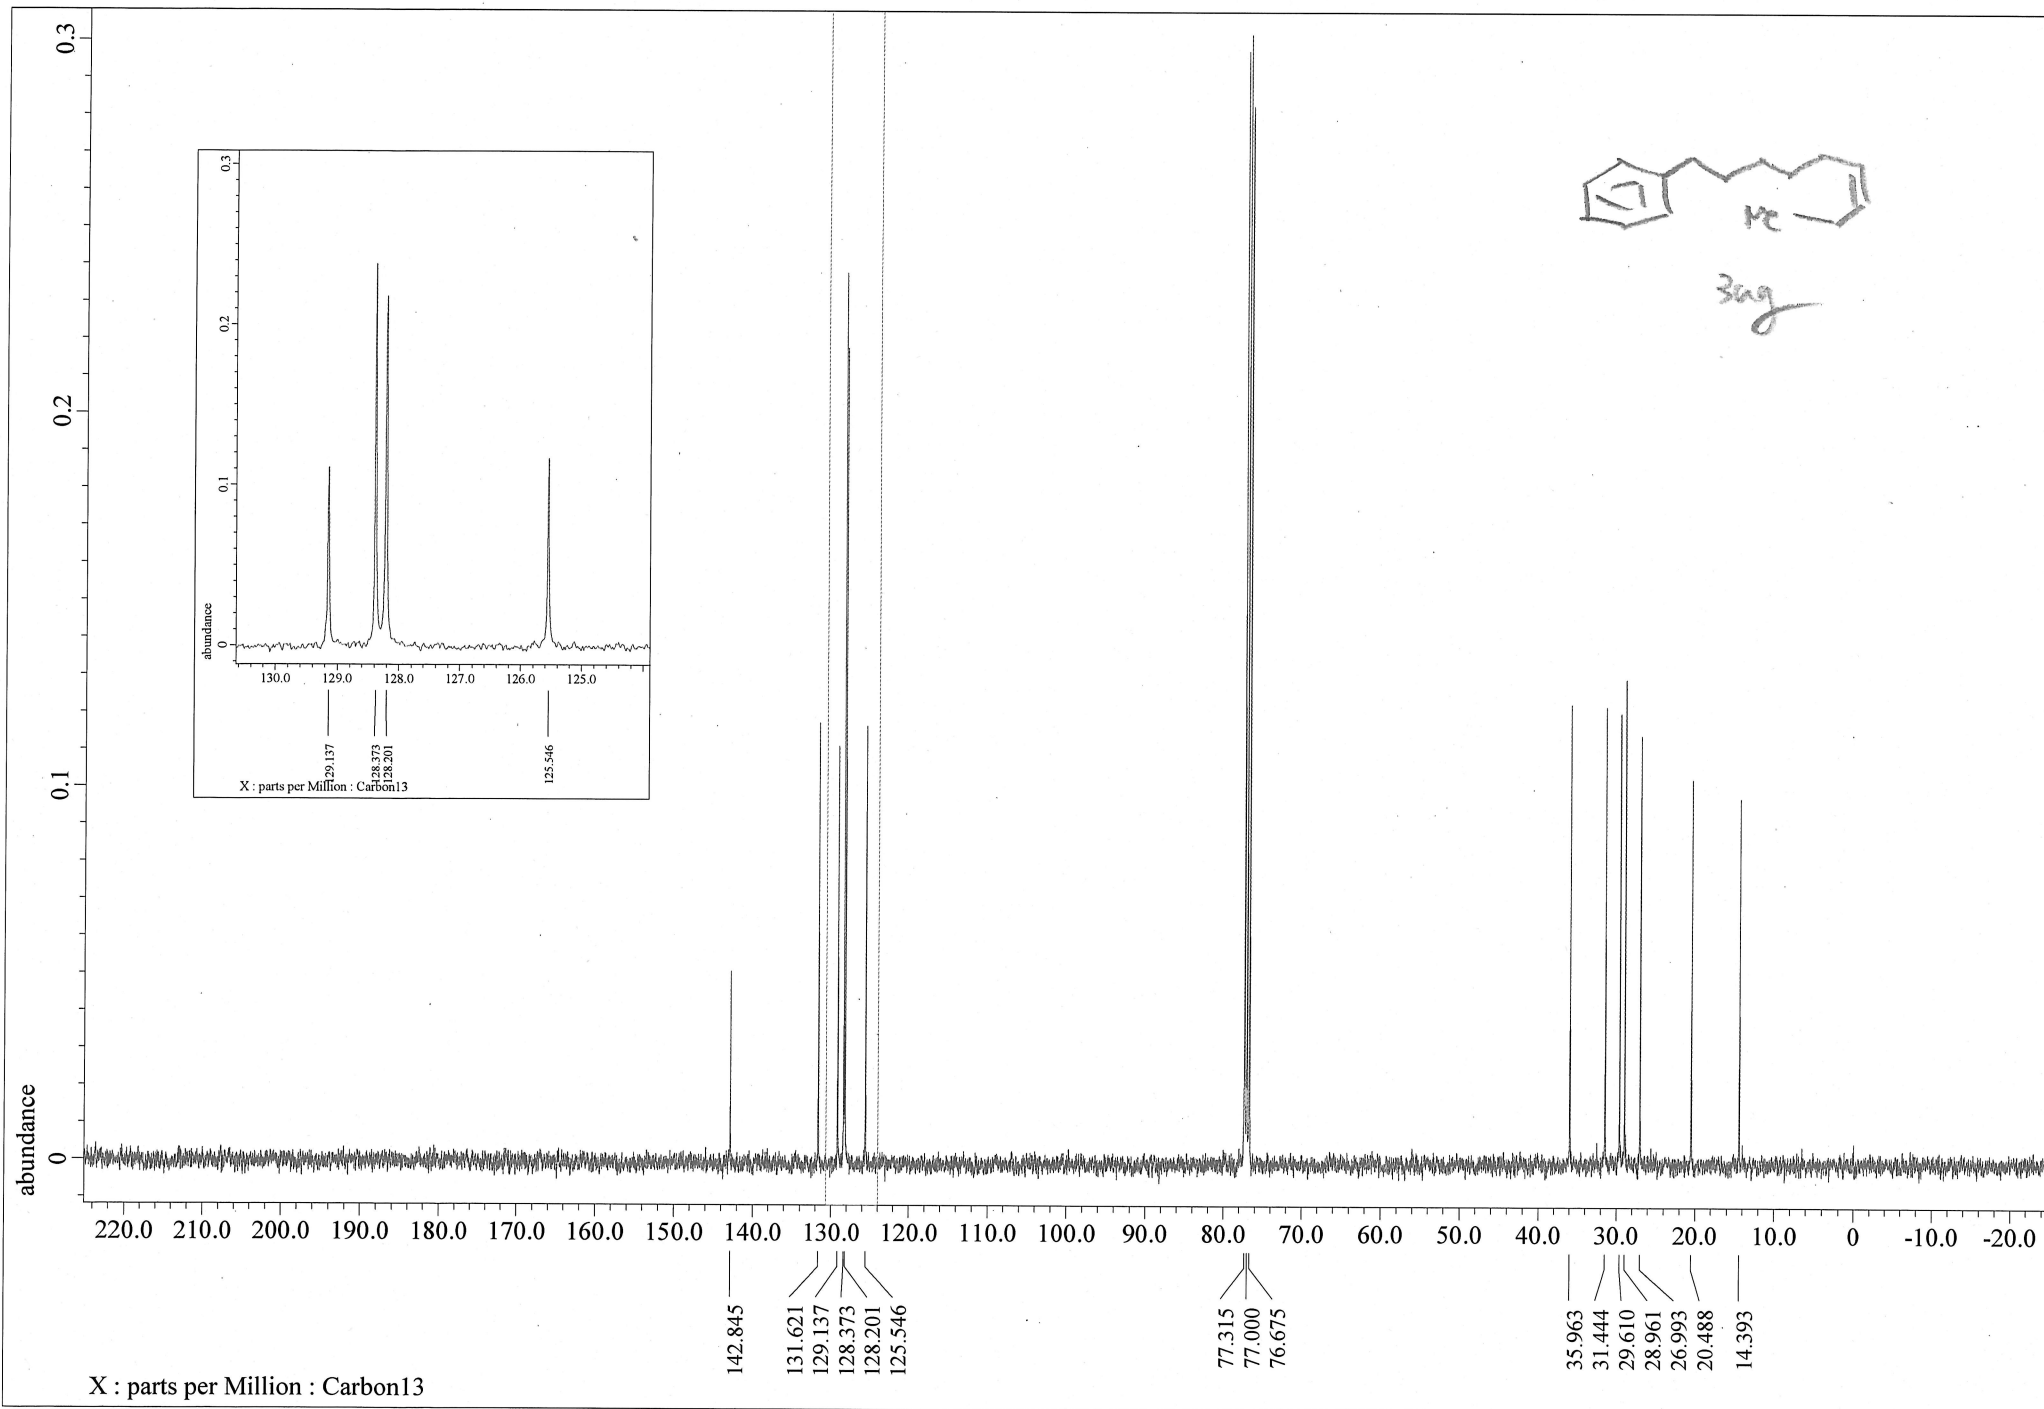

Supplement: d4mr00067f1.pdf [file d4mr00067f1.pdf]
